# Supplementary material for: Discovery of potent thrombin inhibitors from a protease-focused DNA-encoded chemical library
Source: PubMed Central journal article supplement (PMC7382296; doi:10.1073/pnas.2005447117), 2020-07-08

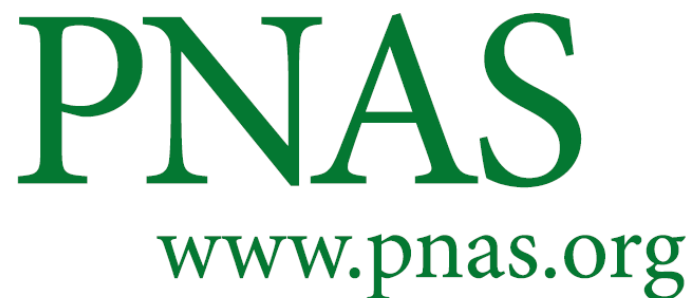

Supplementary Information for

**Discovery of potent thrombin inhibitors from a protease-focused DNA-encoded chemical library**

Surendra Dawadi,\* Nicholas Simmons, Gabriella Miklossy, Kurt M. Bohren, John C. Faver, Melek Nihan Ucisik, Pranavanand Nyshadham, Zhifeng Yu, and Martin M. Matzuk\*

Center for Drug Discovery, Department of Pathology and Immunology, Baylor College of Medicine, Houston, Texas 77030, United States

Surendra Dawadi; Martin M. Matzuk  
Email: [dawadi@bcm.edu](mailto:dawadi@bcm.edu) or [mmatzuk@bcm.edu](mailto:mmatzuk@bcm.edu)

## Table of Contents

### 1. General Information

|                                                                     |    |
|---------------------------------------------------------------------|----|
| 1a) Materials and instrumentation.....                              | S3 |
| 1b) General analytical procedure for oligonucleotides.....          | S4 |
| 1c) General procedure for the isolation of oligonucleotides.....    | S4 |
| 1d) General procedure for DNA ligation and gel electrophoresis..... | S4 |

### 2. General Procedure for Chemical Reactions on DNA

|                                                                                             |    |
|---------------------------------------------------------------------------------------------|----|
| 2a) DNA-HP synthesis.....                                                                   | S5 |
| 2b) Acylation using HATU/HOAt.....                                                          | S6 |
| 2c) Reverse acylation using DMTMM.....                                                      | S6 |
| 2d) -NBoc deprotection.....                                                                 | S6 |
| 2e) -NFmoc deprotection.....                                                                | S6 |
| 2f) Nitro reduction.....                                                                    | S6 |
| 2g) Nitrile reduction.....                                                                  | S7 |
| 2h) Guanidine formation.....                                                                | S7 |
| 2i) Reaction of amines with electrophiles.....                                              | S7 |
| 2j) Conversion of primary amines to isocyanates followed by reaction with nucleophiles..... | S7 |

### 3. Optimization of Guanidine Formation

|                                |    |
|--------------------------------|----|
| 3a) Substrate preparation..... | S8 |
| 3b) Guanidine formation.....   | S9 |

### 4. Optimization of Nitrile Reduction

|                                                                                         |     |
|-----------------------------------------------------------------------------------------|-----|
| 4a) Substrate preparation.....                                                          | S10 |
| 4b) Nitrile reduction.....                                                              | S11 |
| 4c) Validation of two reactions: nitrile reduction followed by guanidine formation..... | S11 |

### 5. Construction of Guanidine Functionalized DNA-Encoded Chemical Library

|                               |     |
|-------------------------------|-----|
| 5a) Chemistry validation..... | S12 |
| 5b) Library synthesis.....    | S15 |

### 6. Selection with Thrombin

|                                                      |     |
|------------------------------------------------------|-----|
| 6a) Affinity selection.....                          | S19 |
| 6b) Cheminformatics and hit identification.....      | S19 |
| 6c) On-DNA hit re-synthesis.....                     | S20 |
| 6d) Off-DNA hit re-synthesis.....                    | S21 |
| 6e) <i>In-vitro</i> assay of hits with thrombin..... | S24 |

### 7. Mass and NMR Spectra

|                                                                                      |      |
|--------------------------------------------------------------------------------------|------|
| 7a) LC/MS traces, $m/z$ peaks, and deconvoluted mass spectra of DTSU and DNA-HP..... | S25  |
| 7b) LC/MS traces and deconvoluted mass spectra of guanidine formation.....           | S27  |
| 7c) LC/MS traces and deconvoluted mass spectra of nitrile reduction.....             | S76  |
| 7d) LC/MS traces and deconvoluted mass spectra of chemistry validation process.....  | S101 |
| 7e) LC/MS traces and deconvoluted mass spectra of on-DNA hit re-synthesis.....       | S137 |
| 7f) $^1\text{H}$ and $^{13}\text{C}$ NMR spectra of off-DNA hit re-synthesis.....    | S143 |

## 1. General Information

**1a. Materials and instrumentation.** The starting material for the synthesis of DNA-encoded chemical libraries, DTSU (“DEC-Tec Starting Unit”) **20** (Figure S1), and other 5'-phosphorylated oligonucleotides were obtained from LGC Biosearch Technologies and assessed for purity through the general analytical procedure for DNA oligonucleotides. T4 DNA ligase was obtained from Enzymatics (Qiagen) and the activity was experimentally determined through test DNA oligomer ligations. Standard reagents and solvents were acquired from commercial sources and used without further purification. Chemical building blocks were sourced from a variety of suppliers and solutions were prepared in acetonitrile or mixed aqueous acetonitrile, and aliquots (200 mM) were stored in Tracetraq barcoded tubes (Biosero) at  $-80^{\circ}\text{C}$ . Barcoded tubes were read using a SampleScan 96 scanner (BiomicroLab) and decoded using Vortex software (Dotmatics). All buffers, including HEPES 10X ligation buffer (300 mM HEPES, 100 mM  $\text{MgCl}_2$ , 100 mM dithiothreitol, 10 mM adenosine triphosphate, pH 7.8), basic borate buffer (250 mM sodium borate/boric acid, pH 9.5), MOPS buffer (250 mM MOPS, pH 7.4), and MES buffer (250 mM MES, pH 5.6) were prepared in-house. Library working solutions were prepared using DNase/RNase-free ultra-pure water (Invitrogen), HPLC-grade acetonitrile (Fisher) or high-purity absolute ethanol (Koptec). LC/MS running solvents were made from Optima LC/MS grade water (Fisher), Optima LC/MS grade methanol (Fisher), 99+% purity hexafluoroisopropanol (Sigma) and HPLC-grade triethylamine (Fisher). Solutions were generally transferred or pooled utilizing Biotix brand pipette tips and reservoirs (various sizes), reactions were generally performed in polypropylene, 96-well, deep-well plates (USA Scientific, various sizes), plates were sealed for incubation with AlumaSeal II foil seals (Excel Scientific) and large volume DNA precipitations were performed in polypropylene 250 mL screw-cap bottles (from various vendors). Heated reactions were either performed in ep384 Mastercyclers (Eppendorf) or in laboratory ovens (Fisher). Solutions were centrifuged in either Avanti J-30I or Allegra X-15R centrifuges (Beckman-Coulter). Optical density measurements were made using a Biophotometer (Eppendorf). Resynthesized hits were purified using Teledyne ISCO CombiFlash system equipped with C-18 column. Organic compounds were characterized using a Bruker 600 MHz or 800 MHz NMR spectroscopy. HRMS measurements were performed using ThermoFisher Scientific Q Exactive instrument. Biochemical validation of hit compounds with thrombin was performed using a commercial Thrombin Inhibitor Screening Kit (Fluorometric, Catalog Number MAK243, Sigma-Aldrich). Linear progress curves were obtained in kinetic mode using a Spectramax M5 plate reader (Molecular Devices, San Jose, CA).

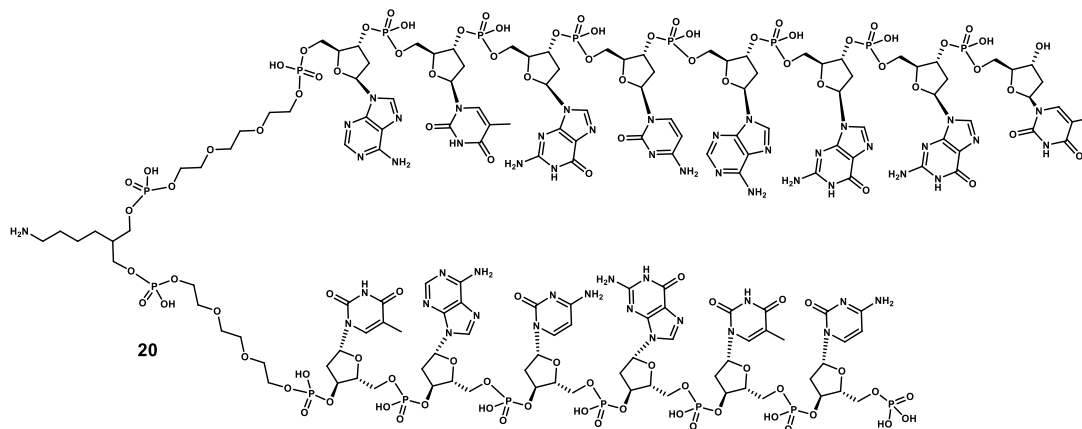

**Figure S1.** Structure of DTSU **20** (5'-Phos-CTGCAT-Spacer 9-Amino C7-Spacer 9-ATGCAGGT 3').

**1b. General analytical procedure for the analysis of DNA oligonucleotide compositions.** A Vanquish UHPLC system was integrated with LTQ XL ion trap mass spectrometer (ThermoFisher Scientific) for LC/MS analysis of oligonucleotides. Injection amounts were typically 5–10  $\mu$ L containing 50–100 pmol DNA analyte. Following LC/MS Parameters were used:

**I) LC settings**

Column: Thermo DNAPac RP (2.1 x 50 mm, 4 $\mu$ m)

Solvent A: 15 mM triethylamine (TEA)/100 mM hexafluoroisopropanol (HFIP) in water

Solvent B: 15 mM TEA/100 mM HFIP in 50% methanol

Solvent C: Methanol

Flow rate: 0.65 mL/min

Run time: 2 min

Column temperature: 100 °C (post column cooler at 40 °C)

**II) MS settings**

Source: ESI in negative mode

Spray voltage: 4100 V

Source heater temperature: 390 °C

Sheath Gas: 28 (instrument units)

Auxiliary Gas: 8 (instrument units)

Sweep Gas: 2 (instrument units)

Capillary temperature: 350 °C

Capillary voltage: -33.0 V

Tube lens: -92.0 V

MS Scan: 500 – 2000  $m/z$

The data analysis was performed by exporting the raw instrument data (.RAW) to an automated biomolecule deconvolution and reporting software (ProMass) which uses a novel algorithm known as ZNova to produce artifact-free mass spectra. The percent abundance of each species in the deconvoluted mass spectra were used to calculate the conversion of chemical reactions.

**1c. General procedure for the isolation of oligonucleotides from aqueous solutions (ethanol precipitation).** Based on the DNA solution volume  $n$ ,  $n/25$  volume of a 5 M NaCl stock solution was added and the solution was gently mixed. Then absolute ethanol ( $3n$  volume, 75%  $v/v$  final ethanol concentration) was added, the solution was thoroughly mixed, and then stored at -20 °C overnight to precipitate the DNA. The resulting slurry was centrifuged (10,000  $\times g$  for 1 h), the supernatant decanted, an addition  $2n$  volume of chilled 70% ethanol ( $v/v$ ) was added, and the pellet was centrifuged again (10,000  $\times g$  for 30 min). After decantation of the supernatant, the pellet was dried (in open air or under gentle vacuum) and reconstituted in neutral water or buffer (to a concentration of  $\sim 1$  mM; assessed by optical density measurements). The solution was then centrifuged (10,000  $\times g$  for 10 min) to pellet any leftover solids (unremoved chemical building blocks or byproducts, denatured ligase, etc.), and the solution was transferred to leave these solids behind. The DNA may undergo a second round of precipitation if the purity is insufficient as assessed by the general analytical procedure. In addition, if the initial solution contains high amounts of organic co-solvent or chaotropic reagents (e.g., piperidine), the solution may be initially diluted with neutral water (by  $n$  or  $2n$ ) to enhance the overall precipitation yield.

**1d. General procedure for DNA ligation and gel electrophoresis.** To a  $\sim 1$  mM solution of the HP-containing library intermediate (1 equiv.), a premixed solution of the duplex oligonucleotide (“codon”) with the appropriate overhang was added (1 mM stock solution in neutral water, 1.05-1.1 equiv.). Separately, a

master-mix consisting of additional water, HEPES 10X ligation buffer, and 200X T4 DNA ligase was prepared and immediately added to the previous DNA mixture with mixing and incubated at rt for overnight. The concentration of the DTSU in the final solution was 0.24 mM (the amount of HEPES 10X ligation buffer was 1/10<sup>th</sup> and the amount of T4 DNA ligase was 1/200<sup>th</sup> of the final volume). After the overnight incubation, the ligation progress was assessed by gel electrophoresis. If incomplete, additional buffer, ligase or codon may be added. Gel electrophoresis was performed with a Bio-Rad PowerPac 1000 power supply. Typically, ligation samples were run on a denaturing 6% TBE-Urea gel (Invitrogen) in TBE buffer at 150 V for 40 min. Gels were stained with ethidium bromide, visualized with a Gel Doc (Bio rad), and assessed for transformation into a new, higher-MW band of ligation product (Figure 5A-C).

## 2. General Procedure for Chemical Reactions on DNA

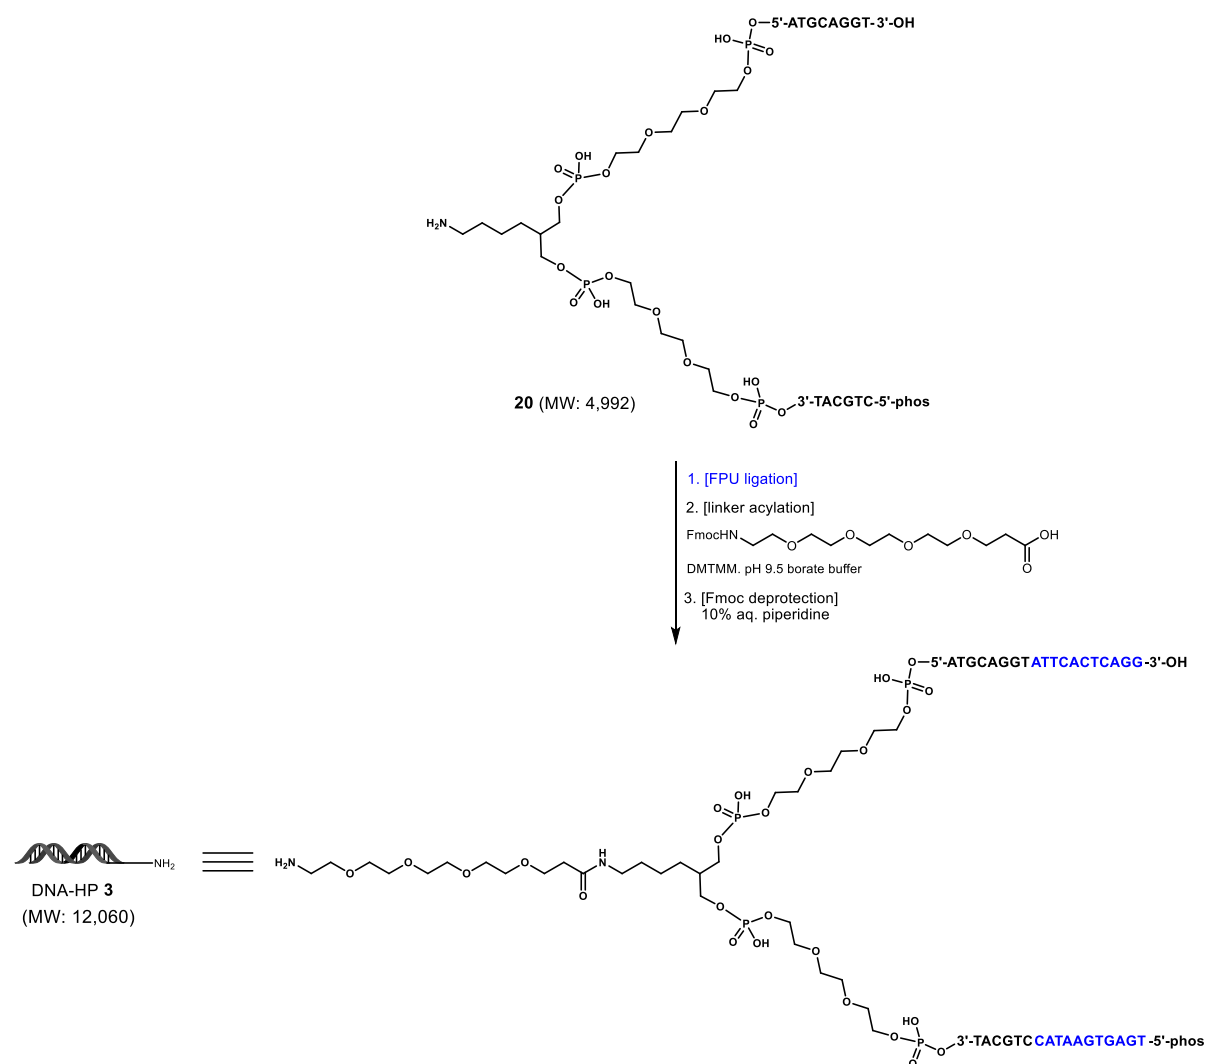

**Scheme S1.** Synthesis of DNA-HP (DNA-Headpiece) **3**.

**2a. DNA-HP synthesis.** To a solution of DTSU **20** (10  $\mu$ mol, 12.1 mM in H<sub>2</sub>O, 1 equiv.) in a 250-mL centrifuge bottle, two 5'-Phos 11-mer DNA oligomers FPU ("forward primer unit", FPU-upper = 5'-phos-ATTCAGT, FPU-lower = 5'-phos-TGAGTGAATAC) was added (10.5  $\mu$ mol each, ~10 mM

solution in H<sub>2</sub>O, 1.05 equiv.) and the reaction was performed using the general ligation procedure. After the overnight incubation, the ligation progress was assessed by LC/MS (conversion to the expected product, MW = 11,814). The ligation product was isolated by ethanol precipitation and reconstituted in 10 mL H<sub>2</sub>O to give an approximate 1 mM solution. To this solution (10 μmol, 1 mM, 1 equiv.), aqueous sodium borate buffer (5,000 μmol, 20 mL, 250 mM, 500 equiv., pH 9.5), MeCN (2.5 mL), and a solution of Fmoc-15-amino-4,7,10,13-tetraoxapentadecanoic acid (1,000 μmol, 2.0 mL, 500 mM in MeCN, 100 equiv.) was added. After brief mixing, DMTMM (1,000 μmol, 2.0 mL, 500 mM in H<sub>2</sub>O, 100 equiv.) was added and the solution was incubated at rt for 2 h. With verification of reaction completion by LC/MS (by formation of expected product, MW = 12,284), the DNA was isolated by ethanol precipitation. To the reconstituted DNA solution (~1 mM, in 10 mL H<sub>2</sub>O), an aq. solution of piperidine (10 mL of 10% piperidine v/v) was added. After incubation at rt for 3 h, the full deprotection of *N*-Fmoc was verified by LC/MS (formation of expected product, MW = 12,060). After DNA isolation by ethanol precipitation method, the pellets were reconstituted in H<sub>2</sub>O (~10 mL) to give a 1.01 mM solution of **3** as assessed by OD measurements. The DNA-headpiece (“DNA-HP”) **3** was used in the next steps without further purification.

**2b. Acylation using HATU/HOAt.** To a solution of carboxylic acid building block (1000 nmol, 5 μL, 200 mM, 100 equiv.) in MeCN (or 50% DMSO in MeCN) was added a pre-mixed solution of HOAt and DIPEA (1000 nmol each, 10 μL, 100 mM each in MeCN, 100 equiv. each) and HATU (1000 nmol, 5 μL, 200 mM in MeCN, 100 equiv.) and the mixture was kept at rt for 30 min. In another tube, to a solution of amine functionalized DNA (10 nmol, 10 μL, 1.0 mM in H<sub>2</sub>O, 1 equiv.) was added pH 9.5 borate buffer (5000 nmol, 20 μL, 250 mM, 500 equiv.). To this DNA solution was added the previously prepared acid mixture and the reaction was allowed to incubate at rt overnight. After the completion of reaction as assessed by LC/MS, DNA was isolated by ethanol precipitation.

**2c. Reverse acylation using DMTMM.** To a solution of carboxylic acid functionalized DNA (10 nmol, 10 μL, 1.0 mM in H<sub>2</sub>O, 1 equiv.) was added pH 5.6 MES buffer (5000 nmol, 20 μL, 250 mM, 500 equiv.), MeCN (10 μL, 30% v/v), amine (1000 nmol, 5 μL, 200 mM in MeCN, 100 equiv.), and DMTMM (1000 nmol, 5 μL, 200 mM in H<sub>2</sub>O, 100 equiv.) sequentially. The reaction was allowed to incubate at rt overnight and DNA was isolated by ethanol precipitation.

**2d. -NBoc deprotection.** To a solution of DNA containing –NBoc group (10 nmol, 10 μL, 1.0 mM in H<sub>2</sub>O, 1 equiv.) was added pH 9.5 borate buffer (5000 nmol, 20 μL, 250 mM, 500 equiv.) and the reaction mixture was allowed to incubate at 80 °C. After the completion of reaction, which took 24–48 h depending on the nature of amine, DNA was isolated by ethanol precipitation.

**2e. -NFmoc deprotection.** To a solution of DNA containing –NFmoc group (10 nmol, 10 μL, 1.0 mM in H<sub>2</sub>O, 1 equiv.) an aq. solution of piperidine (10 μL of 10% piperidine v/v) was added. After incubation at rt for 3 h, DNA was isolated by ethanol precipitation.

**2f. Nitro reduction.** Reduction of aromatic nitro compounds to anilines was carried out using a previously reported method (S1). Briefly, to a solution of DNA containing nitro group (10 nmol, 10 μL, 1.0 mM in H<sub>2</sub>O, 1 equiv.) was added EtOH (12 μL, 30% v/v), 1.5 M NaOH (5000 nmol, 3.3 μL, 500 equiv.), and hypodiboric acid (1500 nmol, 15 μL, 100 mM in H<sub>2</sub>O, 150 equiv.) sequentially. After incubation at rt for 2 h, DNA was isolated by ethanol precipitation.

**2g. Nitrile reduction.** To a solution of DNA-conjugated cyano substrates (50 nmol, 50  $\mu$ L, 1.0 mM in H<sub>2</sub>O, 1 equiv.) was added pH 5.6 MES buffer (25000 nmol, 100  $\mu$ L, 250 mM in H<sub>2</sub>O, 500 equiv.), MeOH (128  $\mu$ L, 40% v/v), and Raney Nickel (2  $\mu$ L, 50% w/v in H<sub>2</sub>O) and the mixture was briefly vortexed and kept at rt for 10 min. To the mixture was added a freshly prepared NaBH<sub>4</sub> solution (200000 nmol, 40  $\mu$ L, 5000 mM in pH 5.6 MES buffer, 4000 equiv.) and the mixture was incubated at rt for 2 h at which point the effervescence formation subsided. The metal was pelleted by centrifugation (15,000  $\times$ g for 10 min), the supernatant was carefully transferred to a fresh tube. The metal was washed with 100  $\mu$ L H<sub>2</sub>O by repeating the centrifugation process. The supernatants were combined and DNA was isolated by ethanol precipitation.

**2h. Guanidine formation.** To a solution of amine or aniline functionalized DNA (10 nmol, 10  $\mu$ L, 1.0 mM in H<sub>2</sub>O, 1 equiv.) was added pH 9.5 borate buffer (5000 nmol, 20  $\mu$ L, 250 mM, 500 equiv.), and reagent A or B or C or D (2000 nmol, 10  $\mu$ L, 200 mM in MeCN [reagent A was prepared in 1:1 H<sub>2</sub>O/MeCN], 200 equiv.). The reaction was allowed to incubate at 45 °C overnight and DNA was isolated by ethanol precipitation.

**2i. Reaction of amines with electrophiles.** To a solution of amine functionalized DNA (10 nmol, 10  $\mu$ L, 1.0 mM in H<sub>2</sub>O, 1 equiv.) was added pH 9.5 borate buffer (5000 nmol, 20  $\mu$ L, 250 mM, 500 equiv.), and electrophiles such as sulfonyl chlorides or isocyanates or anhydrides (2000 nmol, 10  $\mu$ L, 200 mM in MeCN, 200 equiv.). The reaction was allowed to incubate at rt overnight and DNA was isolated by ethanol precipitation.

**2j. Conversion of primary amine to isocyanates followed by reaction with nucleophiles.** To a solution of primary amine functionalized DNA (10 nmol, 10  $\mu$ L, 1.0 mM in H<sub>2</sub>O, 1 equiv.) was added pH 7.4 MOPS buffer (5000 nmol, 20  $\mu$ L, 250 mM, 500 equiv.), and di-2-pyridyl carbonate (1000 nmol, 5  $\mu$ L, 200 mM in MeCN, 100 equiv.) and the mixture was kept at rt for 1 h. To avoid the formation of carbamate byproduct due to the reaction between intermediate isocyanate and residual EtOH, the DNA was well dried in speed-vac before use for this reaction. After the complete conversion primary amine to isocyanate as assessed by LC/MS, nucleophiles such as amines, anilines, and phenols (2000 nmol, 10  $\mu$ L, 200 mM in MeCN, 200 equiv.) were added. The reaction was allowed to incubate at rt overnight and DNA was isolated by ethanol precipitation.

### 3. Optimization of Guanidine Formation

**3a) Substrate preparation.** Compounds **1a-u** were obtained from DNA-HP **3** and twenty-one commercially available *N*-Boc amino acids using HATU/HOAt acylation method followed by using the general *N*-Boc deprotection method. The structure of the products and the conversions are listed below.

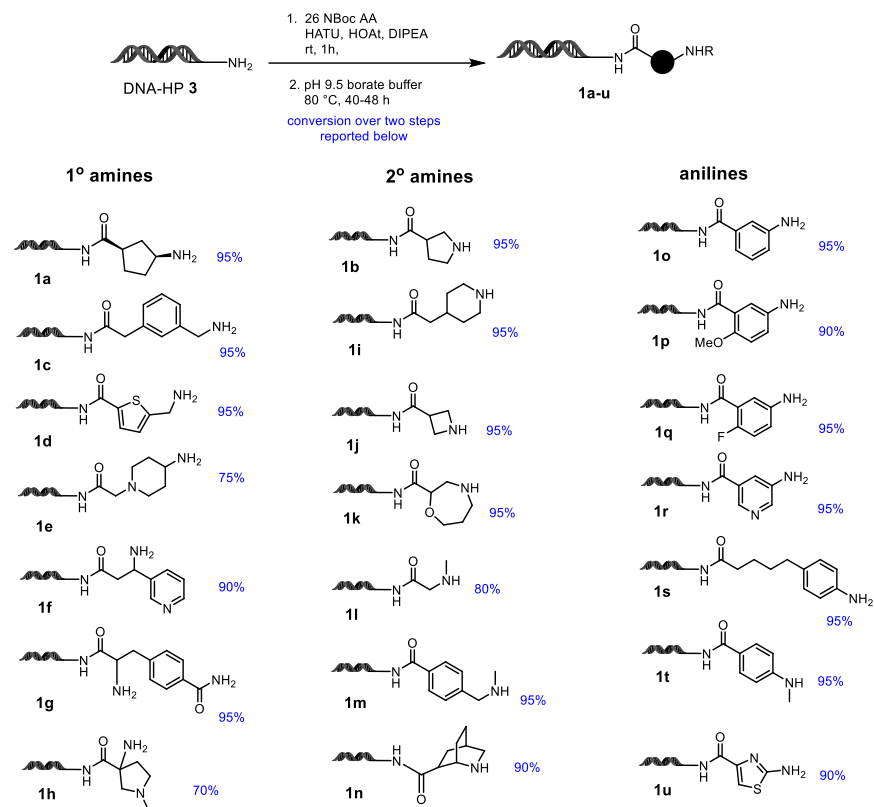

**Figure S2.** Structure and yield of amines and anilines synthesized to study substrate scope of guanidinylation.



### 3b) Guanidine formation

**Table S1.** Optimization of DNA-compatible guanidine formation conditions employing primary amine **1a** and secondary amine **1b**.

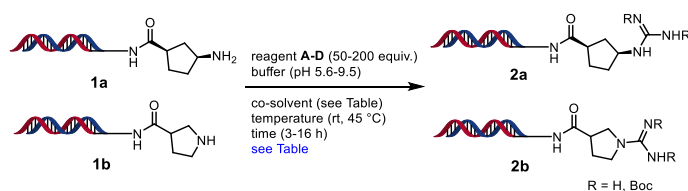

| Entry          | Substrate                  | Product   | Reagent        | Condition                         | Co-solvent     | Conversion (%)          |                          |
|----------------|----------------------------|-----------|----------------|-----------------------------------|----------------|-------------------------|--------------------------|
| 1              | <b>1a</b>                  | <b>2a</b> | A (200 equiv.) | pH 9.5 borate, rt, 16 h           | MeCN (25% v/v) | 65                      |                          |
|                |                            |           |                | <b>pH 9.5 borate, 45 °C, 16 h</b> |                | <b>90</b>               |                          |
|                |                            |           |                | pH 7.4 MOPS, rt, 16 h             |                | <5                      |                          |
|                |                            |           |                | pH 7.4 MOPS, 45 °C, 16 h          |                | 30                      |                          |
|                |                            |           |                | pH 5.6 MES, rt, 16 h              |                | <5                      |                          |
| 2              | <b>1a</b>                  | <b>2a</b> | B (200 equiv.) | pH 9.5 borate, rt, 16 h           | MeCN (25% v/v) | <5                      |                          |
|                |                            |           |                | pH 9.5 borate, 45 °C, 16 h        |                | <5                      |                          |
|                |                            |           |                | pH 7.4 MOPS, rt, 16 h             |                | <5                      |                          |
|                |                            |           |                | pH 7.4 MOPS, 45 °C, 16 h          |                | <5                      |                          |
|                |                            |           |                | pH 5.6 MES, rt, 16 h              |                | <5                      |                          |
| 3 <sup>a</sup> | <b>1a</b>                  | <b>2a</b> | C (200 equiv.) | <b>pH 9.5 borate, rt, 16 h</b>    | MeCN (25% v/v) | <b>90</b> (85:15:0)     |                          |
|                |                            |           |                | <b>pH 9.5 borate, 45 °C, 16 h</b> |                | <b>&gt;95</b> (0:40:60) |                          |
|                |                            |           |                | pH 7.4 MOPS, rt, 16 h             |                | 10 (100:0:0)            |                          |
|                |                            |           |                | pH 7.4 MOPS, 45 °C, 16 h          |                | 80 (0:0:100)            |                          |
|                |                            |           |                | pH 5.6 MES, rt, 16 h              |                | <5                      |                          |
| 4 <sup>b</sup> | <b>1a</b>                  | <b>2a</b> | D (200 equiv.) | pH 9.5 borate, rt, 16 h           | MeCN (25% v/v) | 10                      |                          |
|                |                            |           |                | pH 9.5 borate, 45 °C, 16 h        |                | 70                      |                          |
|                |                            |           |                | pH 7.4 MOPS, rt, 16 h             |                | <5                      |                          |
|                |                            |           |                | pH 7.4 MOPS, 45 °C, 16 h          |                | 50                      |                          |
|                |                            |           |                | pH 5.6 MES, rt, 16 h              |                | <5                      |                          |
| 6              | <b>1a</b>                  | <b>2a</b> | A (200 equiv.) | pH 9.5 borate, 45 °C, 3 h         | MeCN (25% v/v) | 15                      |                          |
|                |                            |           | A (200 equiv.) | pH 9.5 borate, 45 °C, 8 h         |                | 35                      |                          |
|                |                            |           | C (200 equiv.) | pH 9.5 borate, 45 °C, 3 h         |                | 70                      |                          |
|                |                            |           | C (200 equiv.) | pH 9.5 borate, 45 °C, 8 h         |                | 80                      |                          |
|                |                            |           | A (50 equiv.)  | pH 9.5 borate, 45 °C, 16 h        |                | 30                      |                          |
|                |                            |           | A (100 equiv.) | pH 9.5 borate, 45 °C, 16 h        |                | 60                      |                          |
|                |                            |           | C (50 equiv.)  | pH 9.5 borate, 45 °C, 16 h        |                | 80                      |                          |
| C (100 equiv.) | pH 9.5 borate, 45 °C, 16 h | 85        |                |                                   |                |                         |                          |
| 7 <sup>a</sup> | <b>1b</b>                  | <b>2b</b> | A (200 equiv.) | <b>pH 9.5 borate, 45 °C, 16 h</b> | MeCN (25% v/v) | <b>&gt;95</b>           |                          |
|                |                            |           | A (200 equiv.) | pH 9.5 borate, 45 °C, 16 h        |                | MeCN (40% v/v)          | >95                      |
|                |                            |           | A (200 equiv.) | pH 9.5 borate, 45 °C, 16 h        |                | EtOH (30% v/v)          | >95                      |
|                |                            |           | B (200 equiv.) | pH 9.5 borate, 45 °C, 16 h        |                | MeCN (25% v/v)          | 20                       |
|                |                            |           | C (200 equiv.) | <b>pH 9.5 borate, 45 °C, 16 h</b> |                | MeCN (25% v/v)          | <b>&gt;95</b> (50:40:10) |
|                |                            |           | D (200 equiv.) | <b>pH 9.5 borate, 45 °C, 16 h</b> |                | MeCN (25% v/v)          | <b>&gt;95</b>            |
| 8              | <b>1b</b>                  | <b>2b</b> | A (200 equiv.) | pH 9.5 borate, 45 °C, 3 h         | MeCN (25% v/v) | 70                      |                          |
|                |                            |           | A (200 equiv.) | pH 9.5 borate, 45 °C, 8 h         |                | 95                      |                          |
|                |                            |           | C (200 equiv.) | pH 9.5 borate, 45 °C, 3 h         |                | 80                      |                          |
|                |                            |           | C (200 equiv.) | pH 9.5 borate, 45 °C, 8 h         |                | 90                      |                          |
|                |                            |           | A (50 equiv.)  | pH 9.5 borate, 45 °C, 16 h        |                | 90                      |                          |
|                |                            |           | A (100 equiv.) | pH 9.5 borate, 45 °C, 16 h        |                | >95                     |                          |
|                |                            |           | C (50 equiv.)  | pH 9.5 borate, 45 °C, 16 h        |                | 90                      |                          |
| C (100 equiv.) | pH 9.5 borate, 45 °C, 16 h | 95        |                |                                   |                |                         |                          |

<sup>a</sup>For reagent C, ratio of bis-Boc guanidine/mono-Boc guanidine/free guanidine is provided in parenthesis. <sup>b</sup>Reagents B, and D can generate products with or without the protecting groups; the conversion reported is the sum of all possible forms.

## 4. Optimization of Nitrile Reduction

**4a) Substrate preparation.** The cyano functionalized DNA-conjugates **21** and **22** were obtained from DTSU **20** and 4-cyanobenzoic acid and 1-cyano cyclopropanecarboxylic acid using HATU/HOAt acylation method, respectively. Compounds **23-27** were obtained from DNA-HP **3** and five cyano-acids using HATU/HOAt acylation method.

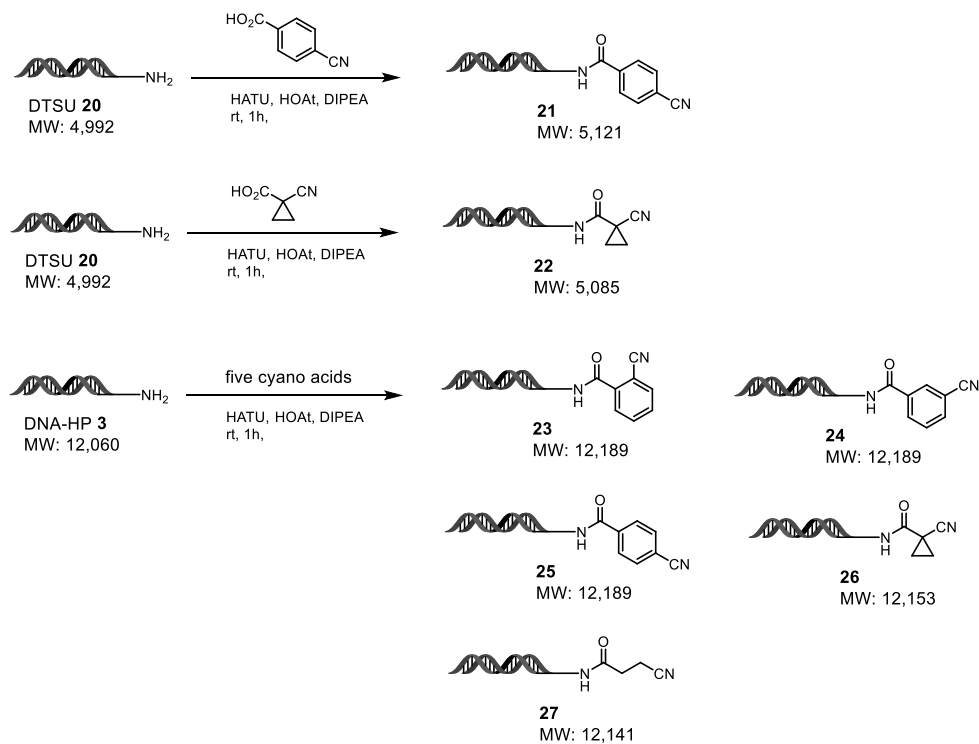

**Figure S3.** Preparation of nitrile functionalized DNA-conjugates for the study of nitrile reduction.

#### 4b) Nitrile reduction

**Table S2.** Optimization of DNA-compatible nitrile reduction conditions employing substrates **21-27**. Raney Ni in the presence of NaBH<sub>4</sub> in pH 5.6 MES buffer at room temperature gave the best conversions.

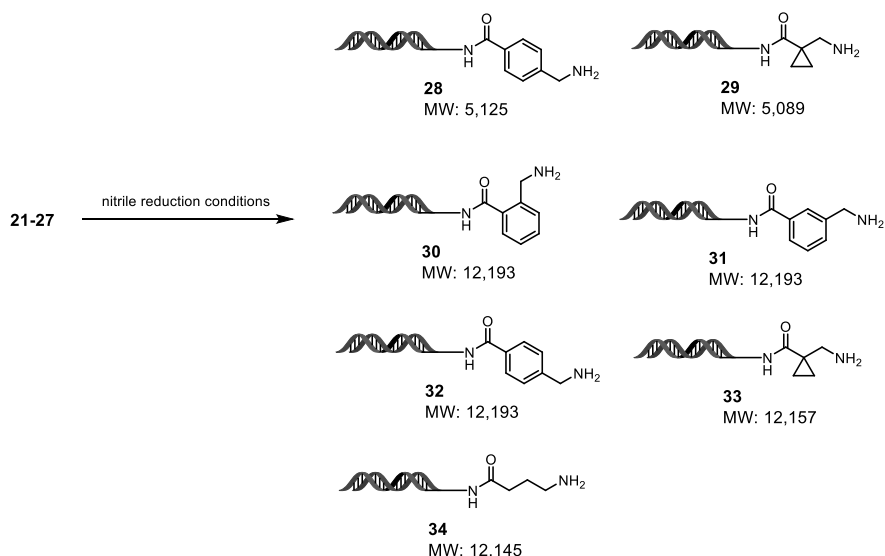

| Entry | Substrate                                                     | Product                                                       | Reducing agent                                                                                                                               | Condition                                                                                      | Conversion (%)                                                                                                                                    |
|-------|---------------------------------------------------------------|---------------------------------------------------------------|----------------------------------------------------------------------------------------------------------------------------------------------|------------------------------------------------------------------------------------------------|---------------------------------------------------------------------------------------------------------------------------------------------------|
| 1     | <b>21</b>                                                     | <b>28</b>                                                     | Hypodiboric acid<br>Hypodiboric acid + Raney Ni<br>Hypodiboric acid + Pd (0)<br>Hypodiboric acid + Pt (0)                                    | 3 pH systems studied<br>(total 12 reactions)                                                   | Not detected<br>Not detected<br>Not detected (DNA damage)<br>Not detected (DNA damage)                                                            |
| 2     | <b>21</b>                                                     | <b>28</b>                                                     | <b>NaBH<sub>4</sub> + NiCl<sub>2</sub>·6H<sub>2</sub>O</b><br>NaBH <sub>4</sub> + InCl <sub>3</sub><br>NaBH <sub>4</sub> + CuSO <sub>4</sub> | 3 pH systems studied<br>(total 9 reactions)                                                    | <b>40 (pH 5.6 MES)</b><br>Not detected<br>Not detected                                                                                            |
| 3     | <b>21</b>                                                     | <b>28</b>                                                     | <b>NaBH<sub>4</sub> + NiCl<sub>2</sub>·6H<sub>2</sub>O</b>                                                                                   | 6 pH systems studied +<br>EtOH (25% v/v)<br>(total 6 reactions)                                | Not detected (500 eq NaOH)<br>Not detected (pH 9.5 borate)<br>18 (pH 8.2 borate)<br>20 (pH 7.4 MOPS)<br><b>50 (pH 5.6 MES)</b><br>50 (pH 5.6 MES) |
| 4     | <b>21</b><br><b>22</b>                                        | <b>28</b><br><b>29</b>                                        | <b>NaBH<sub>4</sub> (4000 equiv.)</b><br><b>+ Raney Ni</b>                                                                                   | 6 pH systems studied +<br>40% co-solvents (MeOH,<br>EtOH, MeCN, MISOP)<br>(total 24 reactions) | <b>&gt;95 (pH 5.6 MES, 40% MeOH)</b><br><b>90 (pH 5.6 MES, 40% MeOH)</b>                                                                          |
| 6     | <b>23</b><br><b>24</b><br><b>25</b><br><b>26</b><br><b>27</b> | <b>30</b><br><b>31</b><br><b>32</b><br><b>33</b><br><b>34</b> | <b>NaBH<sub>4</sub> (4000 equiv.)</b><br><b>+ Raney Ni</b>                                                                                   | <b>pH 5.6 MES, 40%</b><br><b>MeOH, rt, 1 h</b>                                                 | 80<br><b>&gt;95</b><br><b>&gt;95</b><br><b>&gt;95</b><br>50                                                                                       |

**4c) Validation of two reactions: nitrile reduction followed by guanidine formation.** We studied the formation of guanidine on the primary amine produced by nitrile reduction using guanidinyllating reagent A (Scheme S2). This reaction sequence further validates the library design. The validation began with on-DNA secondary amine **1b**.

Compounds **35-37** were obtained from **1b** and three commercially available cyano-acids, using the general HATU/HOAt acylation method.

Compounds **38-40** were obtained from **35-37** using the general nitrile reduction method.

Compounds **41-43** were obtained from benzylic amines **38-40** using the general guanidine formation method employing guanidinyllating reagent A. Each intermediate and products was analyzed by UPLC-MS methods.

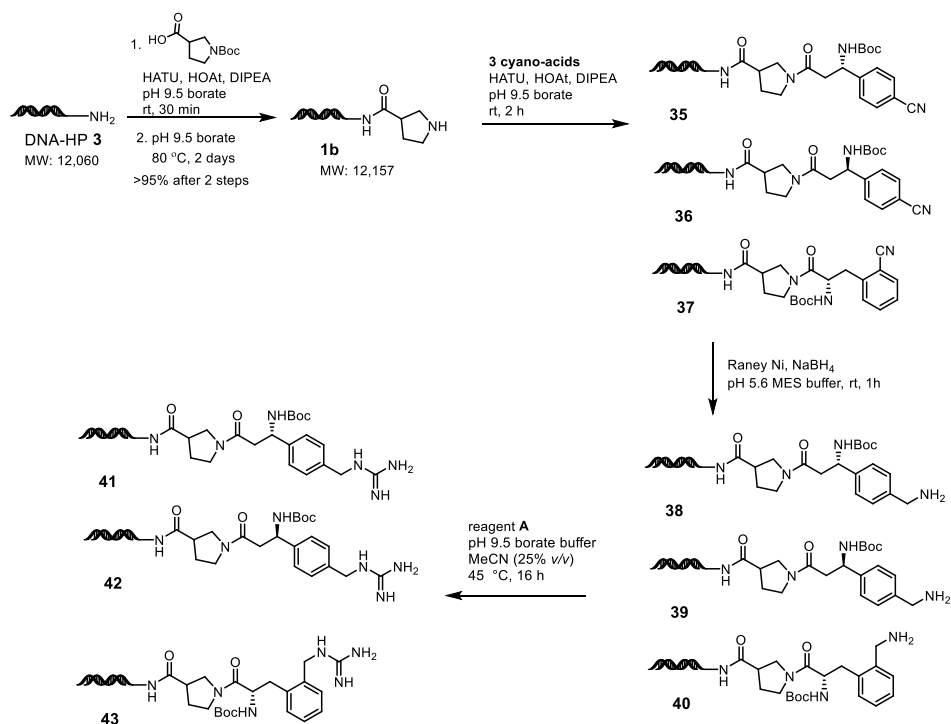

**Scheme S2.** Validation of nitrile reduction and guanidine formation by the synthesis of products **41-43**.

## 5. Construction of Guanidine Functionalized DNA-Encoded Chemical Library

### 5a) Chemistry validation

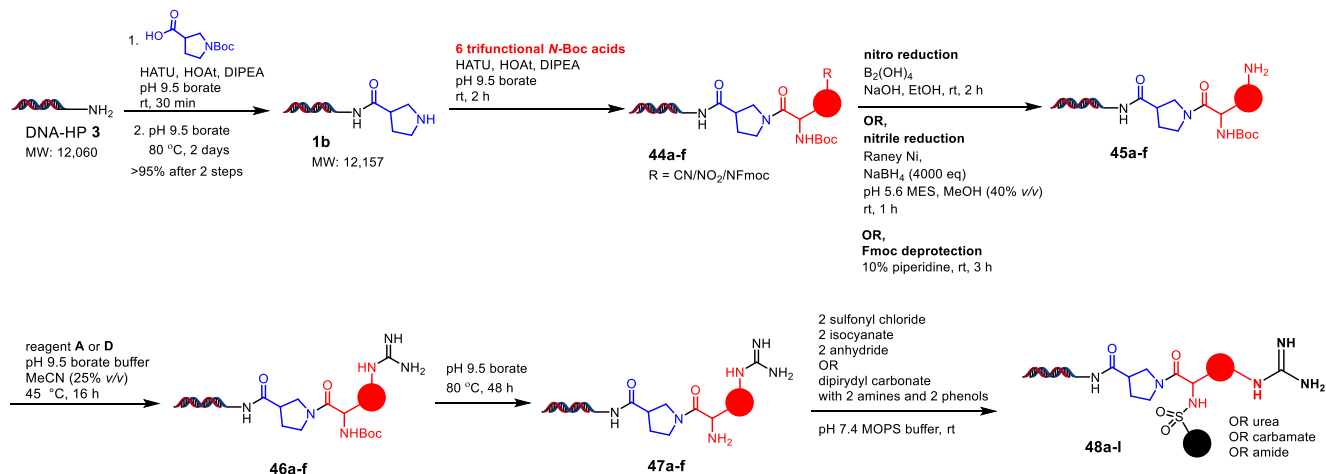

**Scheme S3.** Validation of chemical reactions that will be employed in protease-focused DECL construction using selected building blocks in each cycle.

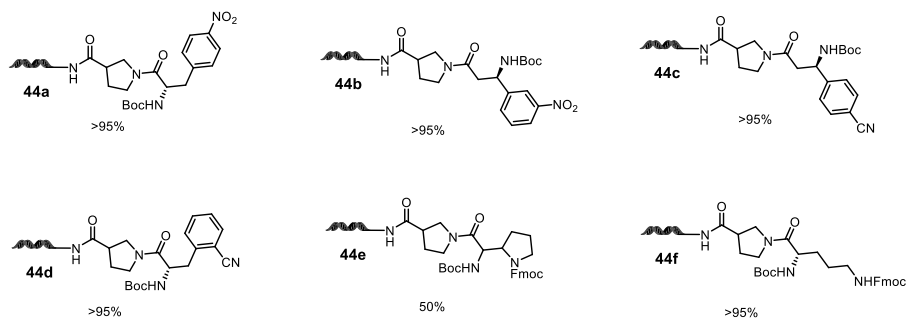

**44a-f.** Compounds **44a-f** were obtained from **1b** and six commercially available  $-MHoc$  amino acids (Boc-4-nitro-L-phenylalanine, Boc-(*R*)-3-amino-3-(3-nitrophenyl)propionic acid, Boc-4-cyano-L- $\beta$ -phenylalanine, Boc-2-cyano-L-phenylalanine, 2-(2-tert-Butoxycarbonylamino-2-carboxy-ethyl)-pyrrolidine-1-carboxylic acid 9*H*-fluoren-9-ylmethyl ester, *N*- $\alpha$ -Boc-*N*- $\delta$ -Fmoc-L-ornithine, respectively) using the general HATU/HOAt acylation method.

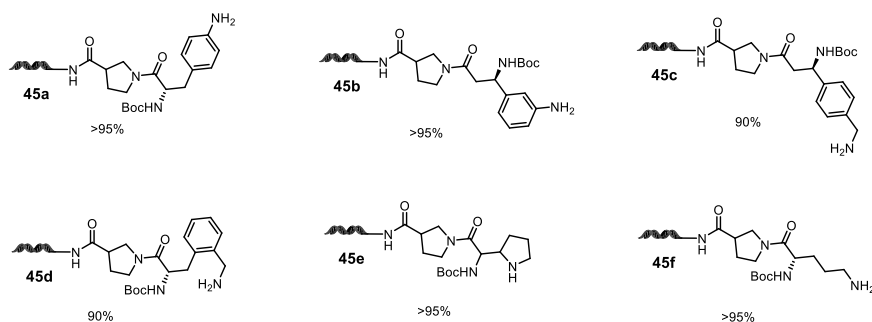

**45a-f.** Compounds **45a-b** were obtained from **44a-b** using the general nitro reduction. Compounds **45c-d** were obtained from **44c-d** using the general nitrile reduction method. Compounds **45e-f** were obtained from **44e-f** using the general  $-NFmoc$  deprotection method.

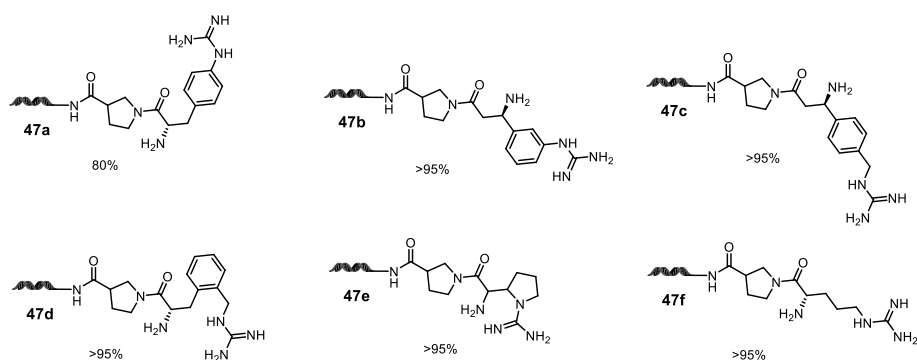

**47a-f.** Compounds **46a-f** were obtained from **45a-f** using the general guanidine formation method. For **46a**, **46b**, and **46e** reagent D was used and for **46c**, **46d**, and **46f**, reagent A was used. Compounds **47a-f** were obtained from **46a-f** using the general  $-NBoc$  deprotection method.

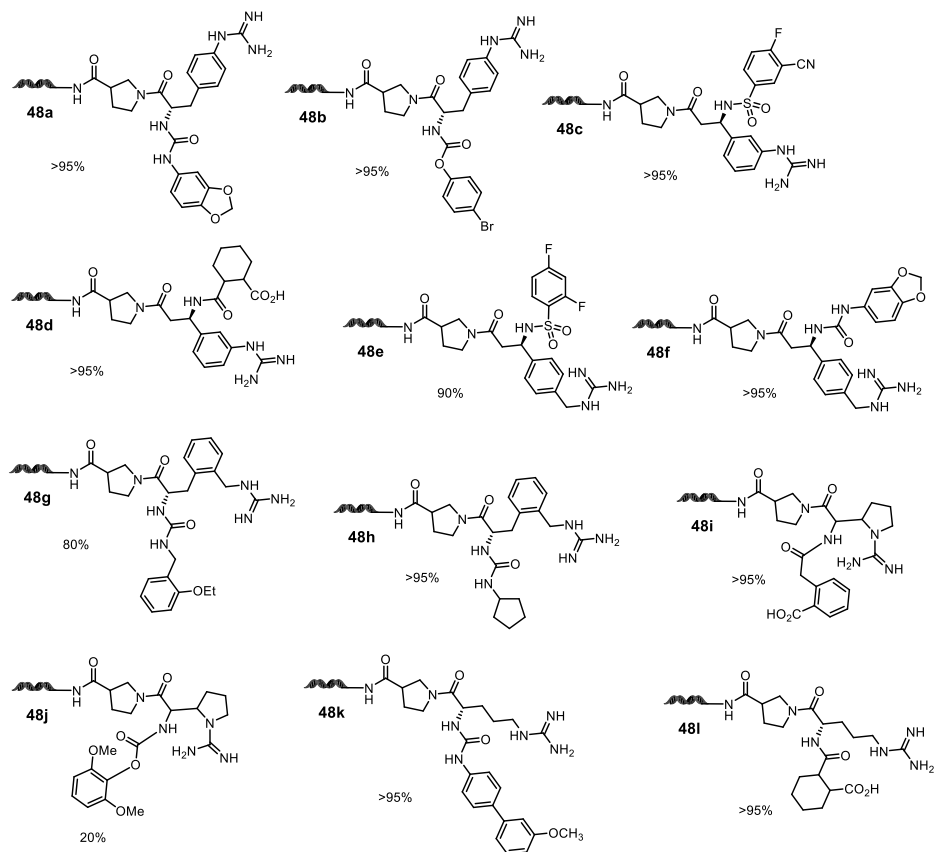

**48a-l.** Compound **48a** was obtained from **47a** and 3,4-(methylenedioxy)phenyl isocyanate using the general method 2i. Compound **48b** was obtained from **47a** and 4-bromophenol using the general method 2j. Compound **48c** was obtained from **47b** and 3-cyano-4-fluorobenzenesulfonyl chloride using the general method 2i. Compound **48d** was obtained from **47b** and *trans*-1,2-cyclohexanedicarboxylic anhydride using the general method 2i. Compound **48e** was obtained from **47c** and 2,4-difluorobenzenesulfonyl chloride using the general method 2i. Compound **48f** was obtained from **47c** and 3,4-(methylenedioxy)phenyl isocyanate using the general method 2i. Compound **48g** was obtained from **47d** and (2-ethoxyphenyl)methanamine using the general method 2j. Compound **48h** was obtained from **47d** and cyclopentyl isocyanate using the general method 2i. Compound **48i** was obtained from **47e** and homophthalic anhydride using the general method 2i. Compound **48j** was obtained from **47e** and 2,6-dimethoxyphenol using the general method 2j. Compound **48k** was obtained from **47f** and 4-(3-Methoxyphenyl)aniline using the general method 2j. Compound **48l** was obtained from **47f** and *trans*-1,2-cyclohexanedicarboxylic anhydride using the general method 2i.

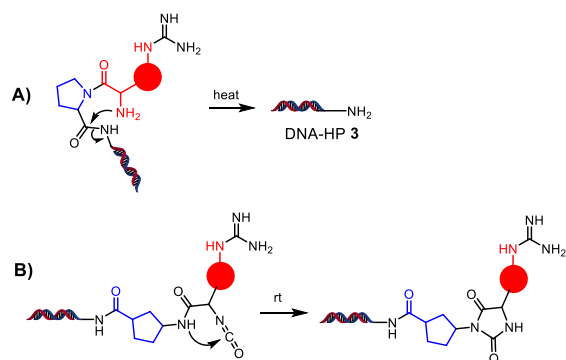

**Figure S4.** (A) If  $\alpha$ -amino acid is used in cycle-1, then amide bond is cleaved by cycle-2 amino group during the Boc deprotection step, producing the DNA-HP 3. (B) If primary -NHBoc amino acid is used in cycle-1, then the amide -NH reacts with isocyanate intramolecularly in cycle-3 to produce stable hydantoin.

## 5b) Library synthesis

**Architecture of the main library build.** The DECL build described is a three-cycle split-and-pool combinatorial library, produced through three iterative cycles each containing a chemical reaction phase, an encoding DNA oligonucleotide (codon) ligation phase with a final pooling phase. The library is constructed on DNA-HP 3, which had been further diversified on the “small molecule end” with two different amino- or carboxy-terminating linkers (Figure S5). Overhangs between codons are two base pairs and encoding regions within codons are eleven base pairs. Specific details and principles related to the overall oligonucleotide sequence design utilized in our DECL production pipeline have been discussed previously (S2).

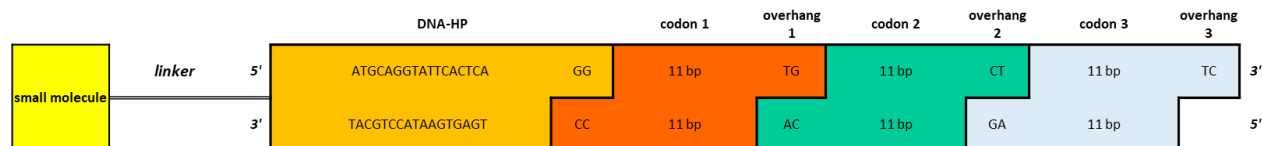

**Figure S5.** The structure of a completed main library build which consists an oligonucleotide portion and a small molecule portion covalently attached with each other with a linker. Separately assembled/ligated oligonucleotides (codons) in each three cycles are shown in alternate colors.

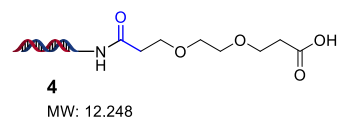

**Synthesis of 4.** To a solution of DNA-HP 3 (5  $\mu$ mol, 5 mL, 1.0 mM in H<sub>2</sub>O, 1 equiv.) was added pH 9.5 borate buffer (2500  $\mu$ mol, 10 mL, 250 mM, 500 equiv.), MeCN (1.3 mL), 3,3'-(ethane-1,2-diylbis(oxy))dipropionic acid (500  $\mu$ mol, 1 mL, 500 mM in MeCN, 100 equiv.), and DMTMM (500  $\mu$ mol, 1 mL, 500 mM in H<sub>2</sub>O, 100 equiv.) sequentially. The reaction was allowed to incubate at rt overnight and DNA was isolated by ethanol precipitation. The DNA pellets were reconstituted in H<sub>2</sub>O (5 mL) to give a ~1.0 mM solution of 4.

**Cycle 1.** A 1 mM solution of each 3 and 4 was split into 186 and 186 wells in 96-well plates (22.5 nmol/well) respectively to make a total of four plates. To each well was added an aliquot of one of 372 codon-1 stock solutions (25 nmol, 25  $\mu$ L, 1 mM in H<sub>2</sub>O, 1.1 equiv.) and ligase master-mix (46.5  $\mu$ L containing 36.7  $\mu$ L H<sub>2</sub>O, 9.4  $\mu$ L of 10X ligation buffer, and 0.47  $\mu$ L of T4 DNA ligase). The ligation was allowed to proceed

at rt for overnight and the completion of ligation was confirmed by LC-MS analysis of each wells as well as by gel electrophoresis of selected wells (Figure S6A). The product DNA was isolated by ethanol precipitation and reconstituted in 22.5  $\mu$ L H<sub>2</sub>O to make ~1.0 mM solution. After the ligation was complete, acylation was carried out in the two plates containing DNA-HP **3** with 92 *-NBoc* amino acid using the general HATU/HOAt acylation method. Each building block is thus encoded twice as well as two wells were reserved for blanks (without acylation reaction, no building block was added but all the reagents were added). Reverse-acylation was carried out in the two plates containing carboxylic acid functionalized DNA **4** with 92 *-NBoc* di-amines using the general DMTMM reverse-acylation method. Again, each building block is encoded twice in addition to two blanks. Each well is assessed for the completion of reaction by LC/MS. Seven building blocks in reverse-acylation plates underwent less than 30% conversion, and those wells were discarded. DNA was isolated by ethanol precipitation and reconstituted in H<sub>2</sub>O (22.5  $\mu$ L). DNA material was pooled (except those seven wells) to give a 9 mL of 0.93 mM solution. To this solution was added pH 9.5 borate buffer (18 mL) and Boc deprotection was carried out using the general *-NBoc* deprotection method. After 48 h, the DNA was isolated by ethanol precipitation and reconstituted in 7.0 mL H<sub>2</sub>O to make ~1.03 mM solution based on OD measurement.

**Cycle 2.** The pooled DNA material from cycle-1 was split into 140 wells (42 nmol/well) in a total of four 96-well plates. The first plate utilized 42 wells in six rows, with each rows containing seven wells for each seven building blocks (*-NHBoc* amino acid containing a nitro group). The second plate utilized 36 wells in six rows, with each rows containing six wells for each six building blocks (*-NHBoc* amino acid containing a nitrile group). The third plate utilized 48 wells in six rows, with each rows containing eight wells for each eight building blocks (*-NHBoc* amino acid containing a *-NHFmoc* group). The fourth plate utilized 14 wells, five wells in each two rows for each five building blocks (*-NHBoc* amino acid with no other functional group, these wells do not undergo guanidine formation), third row containing two wells for two blanks (no building block added), and fourth two wells for two blanks that undergoes guanidinylation of cycle-1 material. Each building blocks and the blanks were encoded twice. To each well acylation reactions was performed using the 26 cycle-2 building blocks mentioned above and the general HATU/HOAt acylation method. DNA was isolated by ethanol precipitation and reconstituted in H<sub>2</sub>O to make ~1 mM solution. No further reactions were performed in the first two rows of plates 1-4. Plate-1 rows 3-6 underwent nitro reduction, plate-2 rows 3-6 underwent nitrile reduction, plate-3 rows 3-6 underwent Fmoc deprotection. After those reactions were complete, DNA was isolated by ethanol precipitation and reconstituted in H<sub>2</sub>O to make ~1 mM solution. Furthermore, plates 1-3 rows 5-6 underwent guanidine formation as well as the two wells of plate-4 row 4. After the completion of guanidinylation, DNA was isolated by ethanol precipitation and reconstituted in H<sub>2</sub>O to make ~1 mM solution. To each well was added an aliquot of one of 140 codon-2 stock solutions and the ligation was allowed to proceed at rt for overnight and the completion of ligation was confirmed by gel electrophoresis of selected wells (Figure S6B). The product DNA was isolated by ethanol precipitation and reconstituted in H<sub>2</sub>O. DNA material was pooled to give a total 10 mL solution. To this solution was added pH 9.5 borate buffer (20 mL) and Boc deprotection was carried out using the general *-NBoc* deprotection method. After 30 h, the DNA was isolated by ethanol precipitation and reconstituted in H<sub>2</sub>O (8.0 mL) to make ~0.65 mM solution based on OD measurement.

**Cycle 3.** The pooled DNA material from cycle-2 was split into 795 wells (6.2 nmol/well) in a total of ten plates. To each well was added an aliquot of one of 795 codon-3 stock solutions and the ligation was allowed to proceed at rt for overnight and the completion of ligation was confirmed by gel electrophoresis of selected



wells (Figure S6C). The product DNA was isolated by ethanol precipitation and reconstituted in H<sub>2</sub>O (10  $\mu$ L) to give  $\sim$ 0.62 mM solution. Each building blocks and the blanks were encoded once. To 94 wells in plate-1, 93 sulfonyl chlorides were added and the reactions were performed using the general method 2i. The last well is for encoding the blank, so no building block was added. To 91 wells in plate-2, 91 isocyanates were added and the reactions were performed using the general method 2i. To 10 wells in plate-3, 10 anhydrides were added and the reactions were performed using the general method 2i. To 24 wells in plate-4, the reactions were performed with 23 phenols using the general method 2j. The last well is for encoding the blank with isocyanate formation, so dipyrindyl carbonate was added but not the building blocks. To 192 wells in plates5-6, the reactions were performed with 192 anilines using the general method 2j. To 384 wells in plates7-10, the reactions were performed with 384 anilines using the general method 2j. After overnight, DNA was isolated by ethanol precipitation and reconstituted in H<sub>2</sub>O and pooled together (final volume: 4.0 mL) to make  $\sim$ 1.2 mM solution based on OD measurement. This makes a 59% recovery of DNA material after 3 cycles of chemistry and ligations.

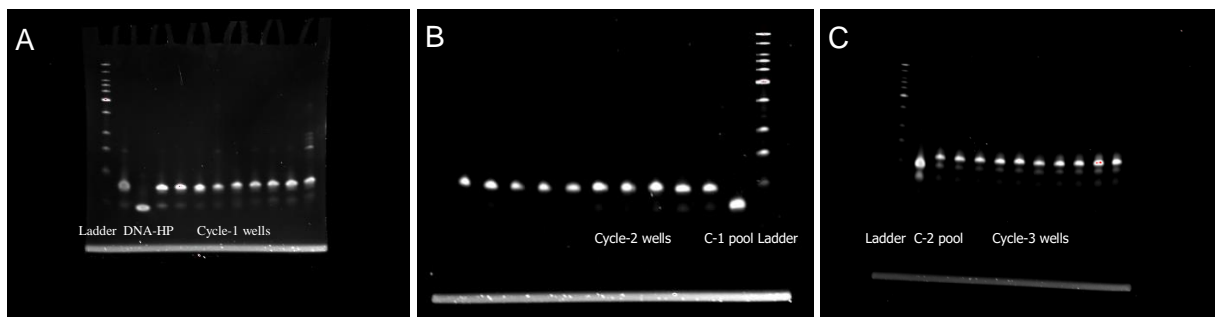

**Figure S6.** (A) 6% TBE-urea denaturing gel of selected wells that demonstrates the completion of codon-1 ligation with DNA-HP **3**. (B) Gel of codon-2 ligation with C-1 pool DNA material. (C) Gel of codon-3 ligation with C-2 pool DNA material.

**Preparation of amplifiable DEL samples (“shots”) for naïve sequencing and selection experiments.** After completion of the main library builds, the entire library material was ligated with a duplexed pair of 12-bp oligonucleotides to encode the library structure/design. The completion of ligation was confirmed by gel electrophoresis (Figure S7A). After DNA isolation by ethanol precipitation, small portions of this material were further ligated with two oligonucleotides called closing primer (CP) containing a region to encode experimental usage, a degenerate region as an amplification control, a segment to increase sequencing base diversity, and a reverse primer region to enable post-selection PCR amplification (the purposes/design of these components are discussed elsewhere) (S2). The completion of the CP ligation was confirmed by gel electrophoresis (Figure S7B).

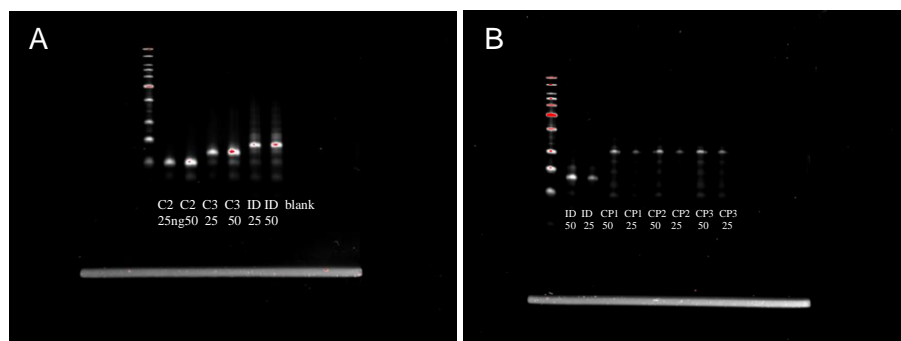

**Figure S7.** (A) 6% TBE-urea denaturing gel demonstrating the completion of library ID ligation. (B) 6% TBE-urea denaturing gel demonstrating the completion of closing primer (CP) ligation.

**Naïve sequencing.** An amplifiable DECL shot was quantified by quantitative Real-Time PCR (qPCR) and then a total of  $3 \times 10^7$  DNA copies were amplified by PCR with primers adaptors to add the sequences compatible with Illumina sequencing flowcells. Platinum Taq DNA Polymerase High Fidelity (Thermo Fisher Scientific) PCR reagent was used for PCR amplification. A total of 13 PCR cycles were used for amplification and the following PCR conditions were used (Initial denaturation at 95 °C for 2.5 min, denaturation at 95 °C for 30 s, annealing at 58 °C for 30 s, extension at 72 °C for 1 min and final extension at 72 °C for 10 min). PCR library template was purified using Agencount AMPure XP SPRI beads according to the manufacturer's instructions. The purified library was analyzed in Bioanalyzer 2100 (Agilent Technologies, Santa Clara, CA) by using Agilent high sensitivity DNA kit to verify library size and concentration before clustering. Illumina NextSeq 500 was used for sequencing. The sequenced data was analyzed for population distribution of codons. We separately analyzed populations of cycle 1, 2, and 3 mono-synthons as well as all di-synthons involving pairs of cycles. All codon sequences were observed after naïve sequencing, and distributions of codon populations were nominal (Figure S8), with the exception of some low populated codons in cycle 3, which encoded a subset of sulfonyl chloride building blocks (appearing at around 40-50% of the mean population).

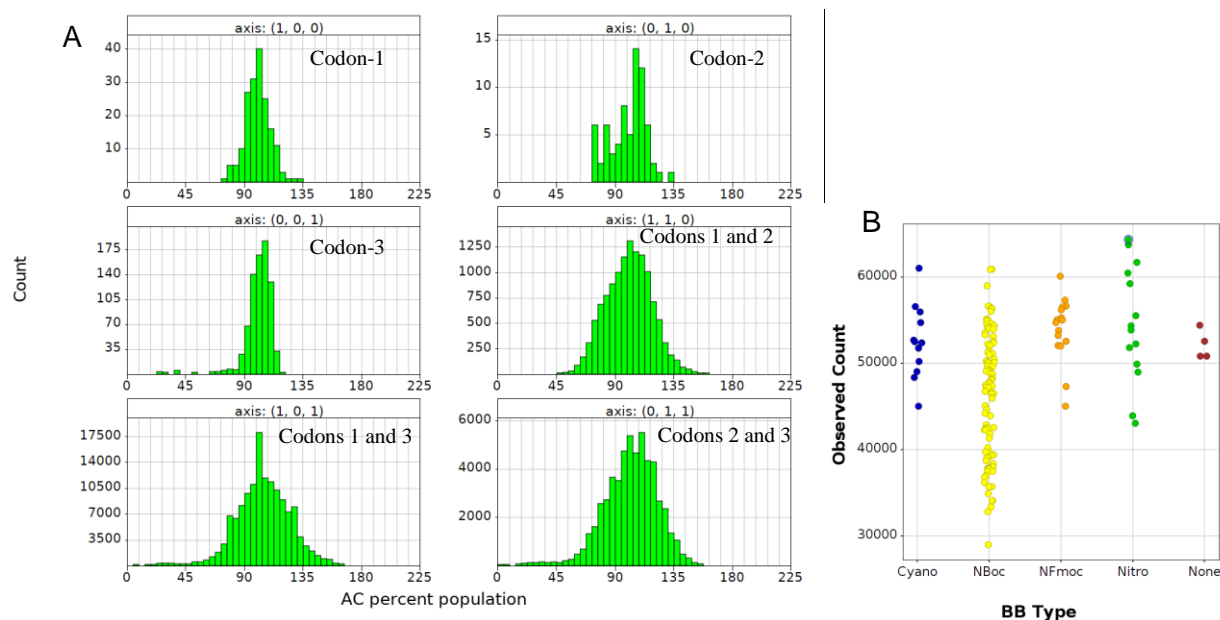

**Figure S8.** Codon distribution analysis of protease-focused DNA-encoded chemical library. (A) Distribution of codons representing mono-synthons and various combination of di-synthons. All codons were represented well except few in cycle-3 encoding sulfonyl chlorides. (B) Analysis of the relative codon distributions between each of the cycle 2 subpools. Codons encoding all building blocks were observed. The *NFmoc* codon distribution is a control for DNA integrity when compared to the new nitrile reduction method. This is an additional evidence of DNA stability under newly developed the reaction conditions.

## 6. Selection with Thrombin

**6a) Affinity selection.** 0.5  $\mu$ M biotinylated human thrombin (Novagen, # 69672-3) was immobilized on streptavidin C1 magnetic beads (ThermoFisher, # 65001) in the selection buffer (20 mM Tris-HCl, pH 8.0, 150 mM NaCl, 1 mM CHAPS, 2.5 mM CaCl<sub>2</sub>) for 30 min at rt with gentle shaking. The beads were washed three times with wash buffer (20 mM Tris-HCl, pH 8.0, 150 mM NaCl, 1 mM CHAPS, 2.5 mM CaCl<sub>2</sub>, 0.5mM biotin) and once with the selection buffer. Library selection was then performed by incubating the thrombin-coated beads with the DNA-encoded chemical library where 1 million copies of each compound were present in the selection buffer containing 0.1 mg/ml sheared salmon sperm DNA (Invitrogen, 15632011) for 30 min at rt with continuous shaking. The Non-Target Control (NTC) in the absence of protein was performed in parallel as a reference. At the end of the incubation, beads were washed twice with the selection buffer without salmon sperm DNA by brief and vigorous vortex. The binding molecules were then eluted by heating the beads at 80 °C for 10 min in selection buffer without salmon sperm DNA. The resulting eluent was quantitated using qPCR and determined whether another round selection was needed. Totally 4 rounds of selection were performed, and the oligonucleotides in the final eluent were PCR amplified for 15 cycles using Platinum Taq DNA Polymerase High Fidelity (Thermo Fisher Scientific, 10966026) with denaturation at 95 °C, annealing at 58 °C, and extension at 72 °C using primers that incorporate complementary sequences to the library headpiece or tailpiece along with the Illumina READ 1 or READ 2 sequences required for Illumina clustering and sequencing. The amplified DNA was cleaned by Agencourt AMPure XP beads and quantitated with Agilent high sensitivity DNA kit using a Bioanalyzer before the sequencing.

**6b) Cheminformatics and hit identification.** Raw DNA sequence reads (in the form of FASTQ files), quality metrics, and sequencing index-to-sample attribute value pairs were obtained from Illumina BaseSpace at the conclusion of sequencing. Samples were linked to their respective FASTQ files based on their sequencing index (DTSU) and were expanded into individual experiments if they were part of a larger pool. Individual samples were then decoded by perfectly matching individual oligonucleotide sub-structures without gaps and in the order defined by the known DNA encoding structure. Valid DNA barcodes were annotated with the corresponding oligonucleotide sequence-to-building block lookup for each of the three codon cycles, which collectively represent a distinct small molecule within a specific DECL. The degenerate UMI (unique molecular identifier) portions of the DNA barcodes were accumulated into a list of UMIs for each unique codon tuple as a method to distinguish experimental vs. amplification events. Unique molecule counts were then evaluated using a directed-graph counting model as described previously (S2). The set of unique codon tuples with unique molecule counts was then aggregated across all possible combinations of codons (all n-synthons), and enrichment for each n-synthon was evaluated independently. Enrichment was evaluated with a normalized z-score metric which normalizes for sampling and library diversity (S2). The resulting enrichment values were then compared by plotting the enrichment in the target sample against enrichment in the NTC sample (Figure 4 in main text). DECL members with significant binding affinity for the target are detected by observing their component n-synthons as enriched on the target axis but not the NTC axis. Figure 5 (main text) highlights tri-synthon components of the thrombin hit series. Importantly, the measured enrichment of each displayed tri-synthons were observed in multiple encodings in each cycle.

### 6c) On-DNA re-synthesis of top two hits.

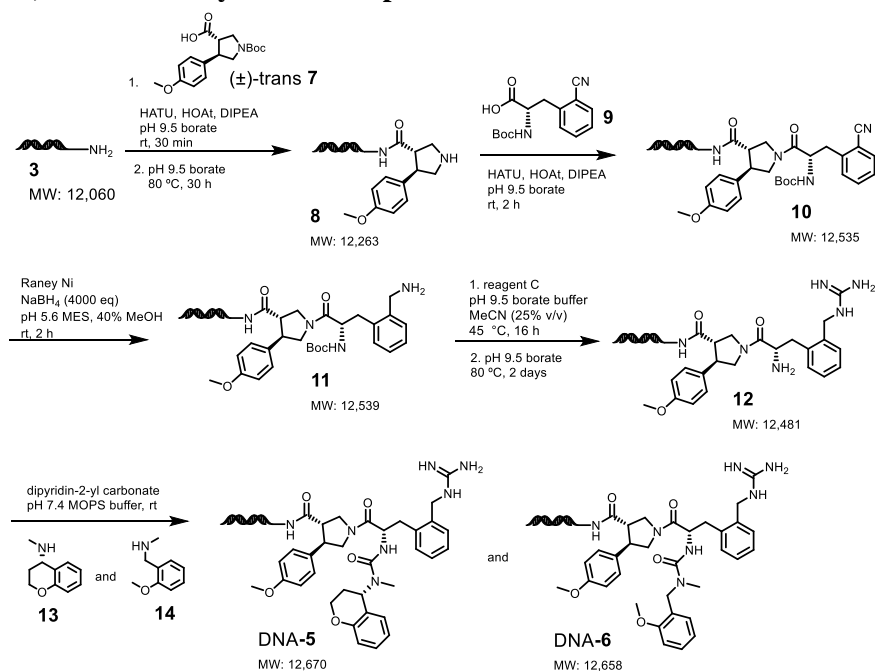

**Scheme S4.** Synthesis of thrombin hits as DNA conjugates, **DNA-5** and **DNA-6**. The DNA oligonucleotide used for this purpose is the 17-base pair DNA-HP **3**.

**8.** Compound **8** was obtained from DNA-HP **3** and  $(\pm)$ -*trans*-1-(*tert*-butoxycarbonyl)-4-(4-methoxyphenyl)pyrrolidine-3-carboxylic acid **7** using the general HATU/HOAt acylation method followed by the general  $-N$ Boc deprotection method. MS: calcd 12,263, found 12,264.

**10.** Compound **10** was obtained from **8** and (*S*)-2-((*tert*-butoxycarbonyl)amino)-3-(2-cyanophenyl)propanoic acid **9** using the general HATU/HOAt acylation method. MS: calcd 12,535, found 12,537.

**11.** Compound **11** was obtained from **10** using the general nitrile reduction method. MS: calcd 12,539, found 12,542.

**12.** Compound **12** was obtained from **11** using the general guanidine formation method followed by the general  $-N$ Boc deprotection method. MS: calcd 12,481, found 12,484.

**DNA-5.** Compound **DNA-5** was obtained from **12** using the general isocyanate formation method 2j followed by the addition of amine **13**. **DNA-5** was purified using Agilent 1260 Infinity II series HPLC system consisting of an autosampler, degasser, quaternary pump and a diode array detector coupled to an analytical scale fraction collector. The mobile phase comprised of following solvent systems: Solvent A: 0.1 M TEAA (pH 7.0) and Solvent B: Acetonitrile/0.1M TEAA, 40/60, v/v. HPLC separations were performed under gradient conditions (5% B at 1.0 min to 30% B at 4.0 min to 60% B at 11.0 min to 95% B at 12.0 min) at a flow rate of 3.0 ml/min using waters xbridge BEH C18 column (10 x 50 mm, 2.5  $\mu$ m) with a run time of 15 minutes. UV detection was done at a wavelength of 260 nm. The compound eluted at a retention time of 10.1 min and the collected fractions were evaporated and lyophilized to obtain **DNA-5** as solid residue. MS: calcd 12,670, found 12,672.

**DNA-6.** Compound **DNA-6** was obtained from **12** using the general isocyanate formation method 2j followed by the addition of amine **14**. It is purified by C-18 reverse phase preparative HPLC method described above. MS: calcd 12,658, found 12,658.

#### 6d) Off-DNA re-synthesis of the top hit

##### (+)-(3*S*,4*R*)-4-(4-methoxyphenyl)-*N*-methylpyrrolidine-3-carboxamide ((+)-**15**)

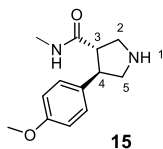

Chemical Formula: C<sub>13</sub>H<sub>18</sub>N<sub>2</sub>O<sub>2</sub>  
Molecular Weight: 234.3

The (±)-**7** enantiomer separation was carried out using Agilent 1260 Infinity prep HPLC system equipped with CHIRALPAK IC (21 × 250 mm, 10 μm) preparative column. Solvent system comprising of heptane (A) and ethanol (B) were used under gradient conditions (5% B at 1.0 min to 40% B at 10.0 min to 95% B at 11.0 min) at a flow rate of 20 ml/min with a run time of 15 minutes. UV detection was performed at a wavelength of 220 nm with a peak width > 0.025 min (0.5 s response time). The enantiomers were eluted at retention times of 9.4 min and 10.9 min respectively and collected using prep scale fraction collector. The collected fractions were evaporated to obtain enantiomers of **7** as white solids. To a solution of (3*S*,4*R*)-1-(*tert*-butoxycarbonyl)-4-(4-methoxyphenyl)pyrrolidine-3-carboxylic acid **7** (100 mg, 0.311 mmol, 1 equiv., retention time 9.4 min) in DMF (6.2 mL) was added HOAt/DIPEA mixture (6.2 mL, 100 mM each in MeCN, 2 equiv.), HATU (236 mg, 0.622 mmol, 2 equiv.), and methylamine hydrochloride (42 mg, 0.622 mmol, 2 equiv.) and the mixture was stirred at rt for 1 h. The reaction mixture was concentrated under reduced pressure, dissolved in EtOAc (10 mL), and washed with sat. NaHCO<sub>3</sub> (10 mL) and brine. The organic layer was dried (Na<sub>2</sub>SO<sub>4</sub>) and concentrated under reduced pressure. Purification by flash chromatography (SiO<sub>2</sub>, MeOH/CH<sub>2</sub>Cl<sub>2</sub> gradient) afforded the coupled product as a white foam. This product was dissolved in 40% TFA in CH<sub>2</sub>Cl<sub>2</sub> (5 mL) and the mixture was stirred at rt for 30 min at which point the Boc deprotection was completed as monitored by LCMS. The reaction mixture was concentrated under reduced pressure and purified by C-18 reverse phase chromatography (10% MeCN/0.1% FA in H<sub>2</sub>O to 100% MeCN) afforded the product **15** as a white solid (67 mg, 92%). [α]<sub>D</sub><sup>25</sup> +108.7 (c 1.0, MeOH); <sup>1</sup>H NMR (600 MHz, CD<sub>3</sub>OD) δ 2.64 (s, 3H), 3.14 (app q, *J* = 9.3 Hz, 1H), 3.35 (app t, *J* = 11.4 Hz, 1H), 3.51–3.47 (m, 1H), 3.64–3.59 (m, 1H), 3.72–3.69 (m, 2H), 3.77 (s, 3H), 6.91 (d, *J* = 8.7 Hz, 2H), 7.23 (d, *J* = 8.7 Hz, 2H); <sup>13</sup>C NMR (151 MHz, CD<sub>3</sub>OD) δ 26.6, 49.2, 49.4, 52.3, 52.6, 55.9, 115.6, 129.7, 129.8, 161.0, 172.7; HRMS (ESI+) *m/z* calcd for C<sub>13</sub>H<sub>19</sub>N<sub>2</sub>O<sub>2</sub><sup>+</sup> [(M + H)<sup>+</sup>] 235.1441, found 235.1436 (Δ -1.9 ppm).

##### methyl (*S*)-2-amino-3-(2-cyanophenyl)propanoate ((+)-**16**)

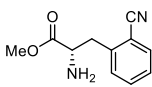

Chemical Formula: C<sub>11</sub>H<sub>12</sub>N<sub>2</sub>O<sub>2</sub>  
Molecular Weight: 204.2

To a solution of (*S*)-2-((*tert*-butoxycarbonyl)amino)-3-(2-cyanophenyl)propanoic acid **9** (290 mg, 1 mmol, 1 equiv.) in DMF (10 mL) was added anhydrous K<sub>2</sub>CO<sub>3</sub> (415 mg, 3 mmol, 3 equiv.), and iodomethane (421 mg, 3 mmol, 3 equiv.) and the mixture was stirred at rt for 1 h. The reaction mixture was filtered and concentrated under reduced pressure. Purification by flash chromatography (SiO<sub>2</sub>, EtOAc/hexanes gradient) afforded the coupled product as a white foam. This product was dissolved in 40% TFA in CH<sub>2</sub>Cl<sub>2</sub> (10 mL) and the mixture was stirred at rt for 30 min at which point the Boc deprotection was completed as monitored by LCMS. The reaction mixture was concentrated under reduced pressure, dissolved in CH<sub>2</sub>Cl<sub>2</sub> and washed with sat. NaHCO<sub>3</sub> (10 mL). The organic layer was dried (Na<sub>2</sub>SO<sub>4</sub>) and concentrated under reduced pressure to afford the product **16** as a white solid (200 mg, >95%). [α]<sub>D</sub><sup>25</sup> +25.1 (c 1.0, CHCl<sub>3</sub>); <sup>1</sup>H NMR (600 MHz, CDCl<sub>3</sub>) δ 1.70 (br s, 2H), 3.05 (dd, *J* = 13.9, 8.5 Hz, 1H), 3.30 (dd, *J* = 13.7, 5.4 Hz, 1H), 3.72 (s, 3H), 3.82–3.80 (m, 1H), 7.34

(app t,  $J = 7.6$  Hz, 1H), 7.37 (app d,  $J = 7.8$  Hz, 1H), 7.53 (app t,  $J = 7.6$  Hz, 1H), 7.63 (app d,  $J = 7.7$  Hz, 1H);  $^{13}\text{C}$  NMR (151 MHz,  $\text{CDCl}_3$ )  $\delta$  39.5, 52.4, 55.5, 113.4, 118.1, 127.5, 130.6, 132.9, 133.1, 141.7, 174.9; HRMS (ESI+)  $m/z$  calcd for  $\text{C}_{11}\text{H}_{13}\text{N}_2\text{O}_2^+$  [(M + H) $^+$ ] 205.0972, found 205.0970 ( $\Delta -0.7$  ppm).

**(*S*)-2-(3-((*S*)-chroman-4-yl)-3-methylureido)-3-(2-cyanophenyl)propanoic acid ((-)-18)**

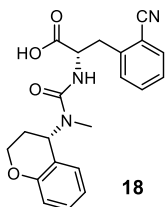

Chemical Formula:  $\text{C}_{21}\text{H}_{21}\text{N}_3\text{O}_4$   
Molecular Weight: 379.4

Step1: To a solution of (+)-**16** (200 mg, 0.98 mmol, 1 equiv.) in MeCN (3 mL) was added DIPEA (348  $\mu\text{L}$ , 1.98 mmol, 2 equiv.) and the mixture was cooled to 0  $^\circ\text{C}$  and stirred at that temperature for 10 min. Dipyridin-2-yl carbonate (440 mg, 2.0 mmol, 2 equiv.) was added and the mixture was stirred at 0  $^\circ\text{C}$  for 1 h.

Step2: (*S*)-*N*-Methylchroman-4-amine **13** was freshly prepared by a previously reported selective monomethylation method (S3). To a solution of (*S*)-chroman-4-amine (free-amine, 200 mg, 1.34 mmol, 1 equiv.) in HFIP (1.4 mL, 13.4 mmol, 10 equiv.) was added methyl triflate (230  $\mu\text{L}$ , 2.01 mmol, 1.5 equiv.) and the mixture was stirred at rt for exactly 1 h. The reaction mixture was quenched by

adding 2N HCl (2 mL) and the volatiles were removed under reduced pressure. The mixture was neutralized by adding sat.  $\text{NaHCO}_3$  and extracted with  $\text{CH}_2\text{Cl}_2$  ( $3 \times 5$  mL). The combined organic layer was dried ( $\text{Na}_2\text{SO}_4$ ) and concentrated under reduced pressure to afford the amine **13** as a pale yellow solid. The solid residue was dissolved in  $\text{CH}_2\text{Cl}_2$  (3 mL) and added to the reaction mixture from step 1 and the mixture was stirred at rt for 16 h. The reaction mixture was concentrated under reduced pressure and purification by flash chromatography ( $\text{SiO}_2$ , EtOAc/hexanes gradient) afforded a mixture of the desired methyl ester **17** and a byproduct (total 208 mg). The byproduct was identified to be the dimer urea of **16**. Multiple attempts to separate the desired urea and the byproduct urea were unsuccessful and the mixture was taken for ester hydrolysis.

Step3: To the solution of this mixture in THF (5 mL) was added  $\text{H}_2\text{O}$  (5 mL) and the biphasic mixture was stirred vigorously at 0  $^\circ\text{C}$  for 10 min.  $\text{LiOH}\cdot\text{H}_2\text{O}$  (68 mg, 1.62 mmol,  $\sim 3$  equiv.) was added and the mixture was stirred at rt for 30 min. The layers were separated and to the aqueous layer was added 1N HCl dropwise to adjust the pH to  $\sim 3$ . The aqueous layer was extracted with EtOAc and the combined organic layer was dried ( $\text{Na}_2\text{SO}_4$ ) and concentrated under reduced pressure. Purification by flash chromatography ( $\text{SiO}_2$ , MeOH/ $\text{CH}_2\text{Cl}_2$  gradient) afforded the product **18** as a white foam (155 mg, 42% after 3 steps).  $R_f$  0.30 (15% MeOH/ $\text{CH}_2\text{Cl}_2$ );  $[\alpha]_{\text{D}}^{25} -129.8$  (c 1.0, MeOH);  $^1\text{H}$  NMR (600 MHz,  $\text{CD}_3\text{OD}$ )  $\delta$  1.97–1.93 (m, 1H), 2.12–2.06 (m, 1H), 2.55 (s, 3H), 3.26 (dd,  $J = 13.8, 10.0$  Hz, 1H), 3.57 (dd,  $J = 13.9, 4.2$  Hz, 1H), 4.11 (td,  $J = 11.4, 1.8$  Hz, 1H), 4.29 (dt,  $J = 11.3, 3.7$  Hz, 1H), 4.81 (dd,  $J = 9.4, 3.8$  Hz, 1H), 5.49 (dd,  $J = 9.7, 6.5$  Hz, 1H), 6.71 (br d,  $J = 7.0$  Hz, 1H), 6.74 (d,  $J = 8.2$  Hz, 1H), 6.82 (t,  $J = 7.4$  Hz, 1H), 7.09 (app t,  $J = 7.9$  Hz, 1H), 7.45 (t,  $J = 7.6$  Hz, 1H), 7.53 (d,  $J = 7.8$  Hz, 1H), 7.64 (t,  $J = 7.6$  Hz, 1H), 7.73 (d,  $J = 7.4$  Hz, 1H);  $^{13}\text{C}$  NMR (151 MHz,  $\text{CD}_3\text{OD}$ )  $\delta$  27.8, 29.9, 37.8, 49.1, 51.4, 66.5, 114.4, 118.1, 119.2, 121.8, 123.1, 128.7, 128.9, 129.7, 132.2, 133.5, 134.1, 134.2, 143.5, 157.9, 160.6; HRMS (ESI+)  $m/z$  calcd for  $\text{C}_{21}\text{H}_{22}\text{N}_3\text{O}_4^+$  [(M + H) $^+$ ] 380.1605, found 380.1608 ( $\Delta 0.9$  ppm).

**(3*S*,4*R*)-1-((*S*)-2-(3-((*S*)-chroman-4-yl)-3-methylureido)-3-(2-cyanophenyl)propanoyl)-4-(4-methoxyphenyl)-*N*-methylpyrrolidine-3-carboxamide ((+)-19)**

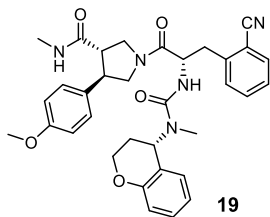

Chemical Formula: C<sub>34</sub>H<sub>37</sub>N<sub>5</sub>O<sub>5</sub>  
Molecular Weight: 595.7

To a solution of **18** (29 mg, 0.077 mmol, 1 equiv.) in DMF (2 mL) was added HOAt/DIPEA mixture (1.54 mL, 100 mM each in MeCN, 2 equiv.), HATU (58 mg, 0.153 mmol, 2 equiv.), and a solution of **15** (29 mg, 0.123 mmol, 1.6 equiv.) in DMF (2 mL) and the mixture was stirred at rt for 16 h. The reaction mixture was concentrated under reduced pressure, dissolved in EtOAc (10 mL), and washed with sat. NaHCO<sub>3</sub> (10 mL) and brine. The organic layer was dried (Na<sub>2</sub>SO<sub>4</sub>) and concentrated under reduced pressure. Purification by flash chromatography (SiO<sub>2</sub>, MeOH/CH<sub>2</sub>Cl<sub>2</sub> gradient) afforded the coupled product **19** as a colorless oil (27 mg, 60%). *R*<sub>f</sub> 0.45 (10% MeOH/CH<sub>2</sub>Cl<sub>2</sub>); [α]<sub>D</sub><sup>25</sup> +22.8 (c 0.47, MeOH); <sup>1</sup>H NMR (600 MHz, CD<sub>3</sub>OD, observed as a mixture of

rotamers) δ 1.93–1.86 (m, 1H), 2.11–2.03 (m, 1H), 2.57 (s, 3H), 2.63–2.61 (four singlets, 3H), 3.01 (app q, *J* = 8.6 Hz, 0.61 H), 3.09 (app q, *J* = 7.9 Hz, 0.38 H), 3.24 (dd, *J* = 13.8, 9.2 Hz, 1H), 3.57–3.35 (m, 3H), 3.71 (t, *J* = 10.6 Hz, 0.64H), 3.77–3.76 (two singlets, 3H), 3.87 (t, *J* = 10.2 Hz, 0.4H), 3.97–3.92 (m, 1.2H), 4.04–4.00 (m, 0.8H), 4.13–4.07 (m, 1H), 4.29–4.26 (m, 1H), 4.99–4.95 (m, 0.62H), 5.10–5.07 (m, 0.38H), 5.47–5.44 (m, 1H), 6.54 (br dd, *J* = 19.2, 7.2 Hz, 0.5H), 6.66 (br dd, *J* = 20.0, 6.9 Hz, 0.5H), 6.75 (d, *J* = 8.2 Hz, 1H), 6.89–6.81 (m, 3H), 7.10 (app t, *J* = 7.7 Hz, 1H), 7.19–7.17 (m, 2H), 7.50–7.47 (m, 1H), 7.55 (d, *J* = 7.5 Hz, 1H), 7.66 (app t, *J* = 7.6 Hz, 1H), 7.75 (d, *J* = 7.7 Hz, 1H), 7.96–7.90 (m, 0.7H); <sup>13</sup>C NMR (151 MHz, CD<sub>3</sub>OD, observed as a mixture of rotamers) δ 26.5, 27.8, 30.0, 37.7, 37.8, 47.4, 50.9, 51.3, 51.5, 53.7, 53.9, 54.0, 54.3, 54.5, 55.8, 66.4, 66.5, 114.4, 115.0, 115.3, 115.4, 118.2, 119.3, 119.4, 121.8, 122.9, 123.1, 128.7, 128.8, 128.9, 129.1, 129.6, 129.7, 129.8, 131.3, 131.8, 132.6, 132.7, 134.1, 134.2, 134.22, 134.3, 142.7, 142.8, 157.9, 160.0, 160.3, 160.6, 160.7, 171.9, 172.3, 173.4, 174.0; HRMS (ESI+) *m/z* calcd for C<sub>34</sub>H<sub>38</sub>N<sub>5</sub>O<sub>5</sub><sup>+</sup> [(M + H)<sup>+</sup>] 596.2867, found 596.2865 (Δ -0.3 ppm).

**(3*S*,4*R*)-1-((*S*)-2-(3-((*S*)-chroman-4-yl)-3-methylureido)-3-(2-(guanidinomethyl)phenyl)propanoyl)-4-(4-methoxyphenyl)-*N*-methylpyrrolidine-3-carboxamide ((+)-5)**

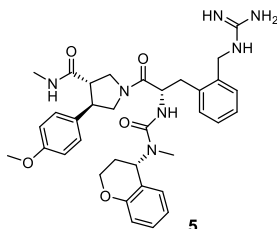

Chemical Formula: C<sub>35</sub>H<sub>43</sub>N<sub>7</sub>O<sub>5</sub>  
Molecular Weight: 641.8

To a solution of **19** (18 mg, 0.030 mmol, 1 equiv.) in MeOH (4 mL) was added Raney Ni (25 μL, 50% wet in H<sub>2</sub>O) followed by a freshly prepared solution of NaBH<sub>4</sub> (114 mg, 3.0 mmol, 100 equiv.) in MeOH (1 mL) and the mixture was stirred at rt for 1 h. The reaction mixture was filtered through a short pad of Celite and concentrated under reduced pressure. The residue was fractionated between H<sub>2</sub>O and CH<sub>2</sub>Cl<sub>2</sub>. The organic layer was dried, evaporated and dissolved in MeCN (2 mL) and DIPEA (16 μL, 0.09 mmol, 3 equiv.) and 1*H*-pyrazole-1-carboximidamide hydrochloride (13 mg, 0.09 mmol, 3 equiv.) were added and the mixture was stirred at rt for 16 h. The

reaction mixture was concentrated under reduced pressure. Purification by C-18 reverse phase chromatography (10% MeCN/0.1% FA in H<sub>2</sub>O to 100% MeCN) afforded the product **5** as a white solid (12 mg, 62%) as a formate salt. [α]<sub>D</sub><sup>25</sup> +30.0 (c 1.0, 9:1 MeOH/DMSO); <sup>1</sup>H NMR (600 MHz, CD<sub>3</sub>OD, observed as a mixture of rotamers) δ 1.95–1.88 (m, 1H), 2.13–2.07 (m, 1H), 2.61–2.57 (three singlets, 6H), 2.82 (app q, *J* = 9.7 Hz, 0.36 H), 2.96 (app q, *J* = 9.4 Hz, 0.72 H), 3.14–3.08 (m, 1.7H), 3.54–3.21 (m, 5.3H), 2.77–2.75 (two singlets, 3H), 3.87 (dd, *J* = 12.2, 8.3 Hz, 0.8H), 3.98 (dd, *J* = 12.0, 8.0 Hz, 0.3H), 4.14–4.09 (m, 1H), 4.33–4.29 (m, 1H), 4.55 (ABq, Δδ = 60.9 Hz, *J* = 15.1 Hz, 1.5H), 4.62 (ABq, Δδ = 96.6 Hz, *J* = 15.4 Hz, 1.5H), 4.81 (submerged in H<sub>2</sub>O peak, 0.63H), 5.03 (app t, *J* = 8.0 Hz, 0.37H), 5.52–5.49 (m, 1H), 6.57–

6.55 (m, 0.27H), 6.69–6.67 (m, 0.76H), 6.76–6.74 (m, 1H), 6.88–6.82 (m, 3H), 7.12–7.07 (m, 3H), 7.47–7.34 (m, 4H), 8.44 (br s, 1.3H, formate ion); <sup>13</sup>C NMR (151 MHz, CD<sub>3</sub>OD, observed as a mixture of rotamers) δ 26.5, 27.8, 30.0, 36.2, 36.3, 43.9, 44.0, 47.5, 50.7, 51.0, 51.5, 51.6, 53.8, 53.9, 54.3, 54.4, 55.8, 66.4, 66.5, 115.3, 115.4, 118.2, 118.3, 121.8, 122.9, 128.7, 128.8, 128.9, 129.0, 129.1, 129.3, 129.4, 129.5, 129.6, 129.7, 129.8, 129.9, 131.1, 131.6, 133.0, 133.1, 136.1, 136.2, 136.7, 136.9, 157.8, 157.9, 158.8, 160.2, 160.4, 160.7, 160.8, 168.6, 172.3, 172.6, 173.4, 174.1; HRMS (ESI+) *m/z* calcd for C<sub>35</sub>H<sub>44</sub>N<sub>7</sub>O<sub>5</sub><sup>+</sup> [(M + H)<sup>+</sup>] 642.3398, found 642.3385 (Δ –2.0 ppm).

**6e) *In-vitro* assay of hits with thrombin.** A thrombin inhibitor screening kit (Sigma-Aldrich cat # MAK243) was used according to the manufacturer's instructions to measure the activity of thrombin in the presence and absence of inhibitors. The kit uses the ability of thrombin to cleave a synthetic AMC-based peptide (AMC = 7-amino-4-methylcoumarin) to release AMC. Upon release AMC becomes fluorescent which can be measured (λ<sub>ex</sub> = 350 nm, λ<sub>em</sub> = 450 nm). The loss of fluorescence intensity due to inhibition of thrombin was measured in kinetic mode every 30 seconds for 10 minutes, and the linear part of the progress curves was used to obtain fractional activity for each curve. Apparent *K<sub>i</sub>* values were calculated as described previously (S4).

#### References:

- S1. H.-C. Du, N. Simmons, J. C. Faver, Z. Yu, M. Palaniappan, K. Riehle, M. M. Matzuk, A Mild, DNA-compatible nitro reduction using B<sub>2</sub>(OH)<sub>4</sub>. *Org. Lett.* **21**, 2194–2199 (2019).
- S2. J. C. Faver, K. Riehle, D. R. Lancia, J. B. J. Milbank, C. S. Kollmann, N. Simmons, Z. Yu, M. M. Matzuk, Quantitative comparison of enrichment from DNA-encoded chemical library selections. *ACS Comb. Sci.* **21**, 75–82 (2019).
- S3. T. Lebleu, X. Ma, J. Maddaluno, J. Legros, Selective monomethylation of primary amines with simple electrophiles. *Chem. Commun.* **50**, 1836–1838 (2014).
- S4. P. Kuzmic, K. C. Elrod, L. M. Cregar, S. Sideris, R. Rai, J. W. Janc, High-throughput Screening of Enzyme Inhibitors: Simultaneous Determination of Tight-Binding Inhibition Constants and Enzyme Concentration. *Anal Biochem.* **286**, 45–50 (2000).



# 7. Representative LC/MS Traces, Mass and NMR spectra

## 7a) DNA-HP synthesis

Y:\Data\Admin\DTSU\DTSU\_

13:30:50

RT: 0.00 - 2.00 SM: 7B

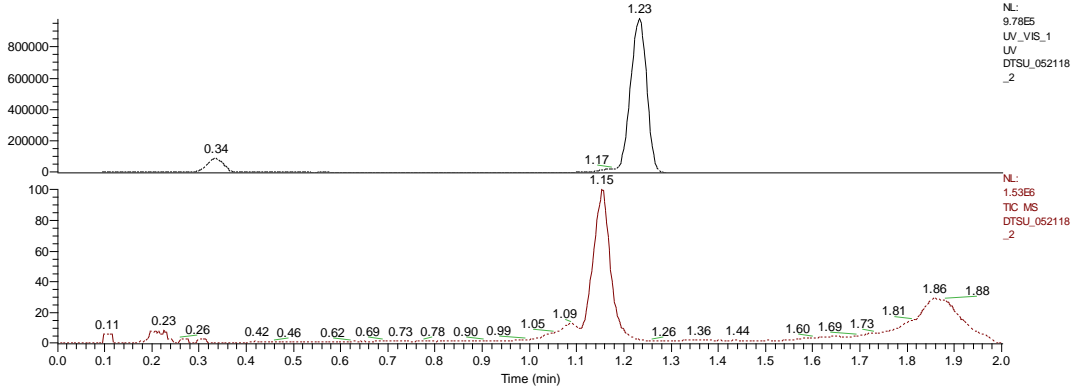

DTSU\_052118\_2 #386-447 RT: 1.09-1.26 AV: 62 NL: 1.62E5

T: ITMS - c ESI Full ms [500.00-2000.00]

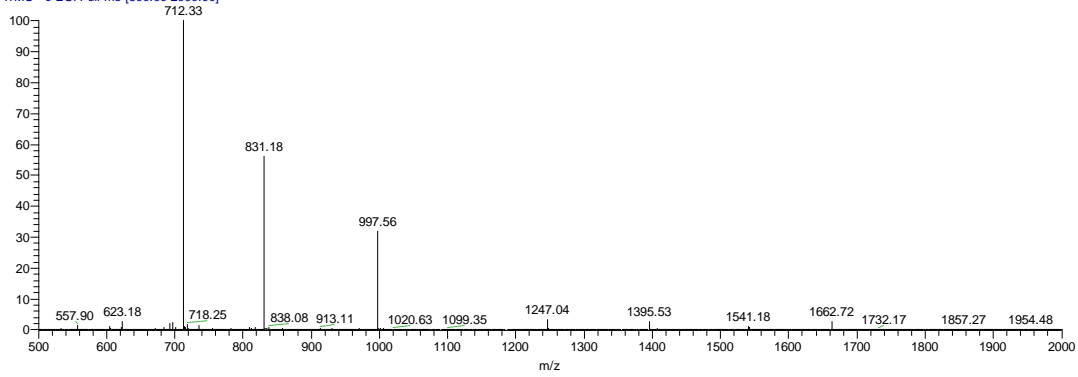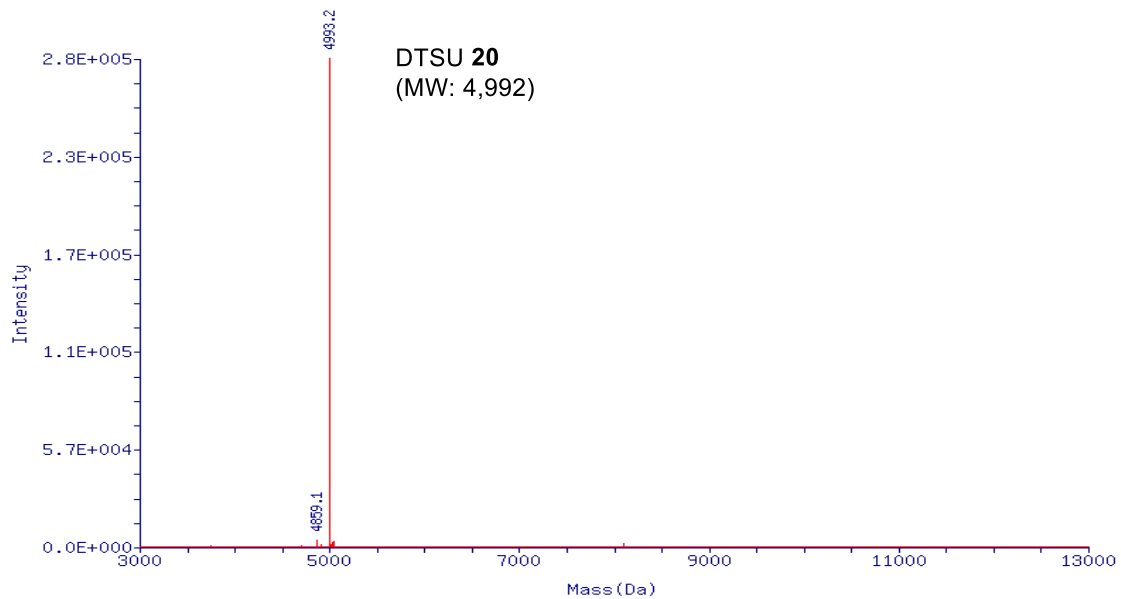

RT: 0.00 - 2.00 SM: 7B

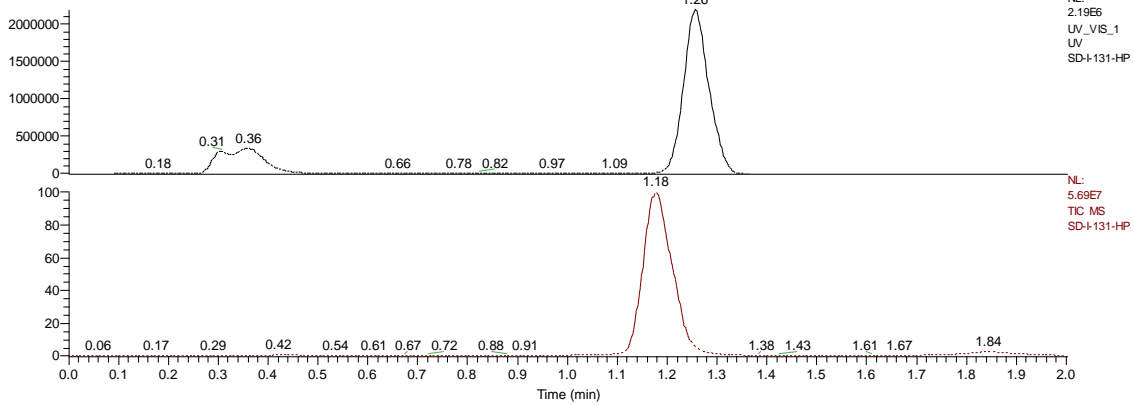

SD-I-131-HP #388-469 RT: 1.10-1.31 AV: 82 NL: 5.66E6  
T: ITMS - c ESI Full ms [500.00-2000.00]

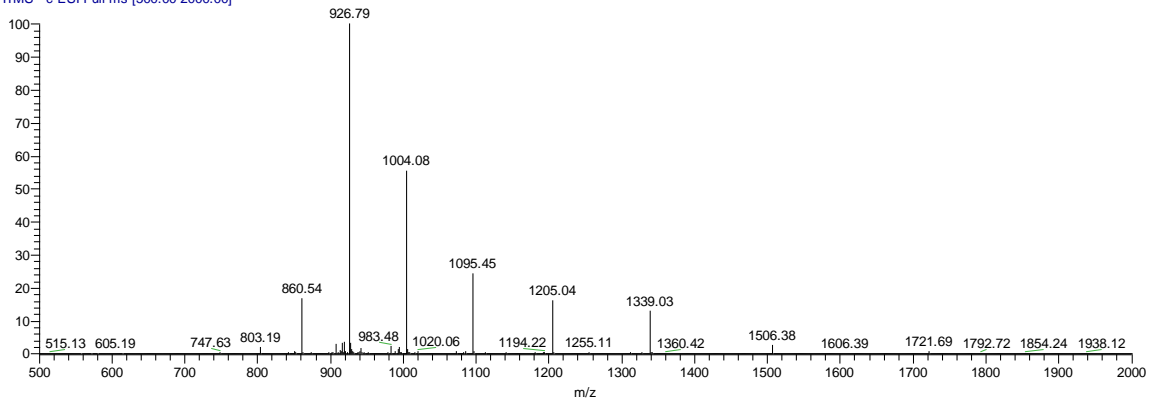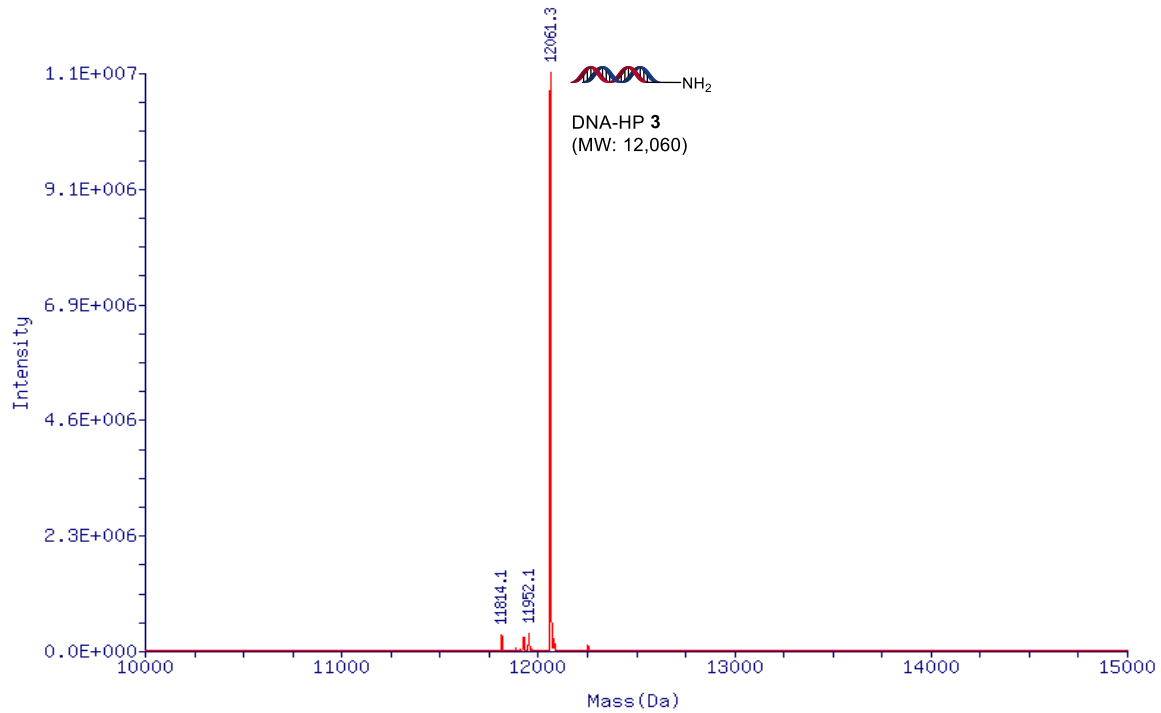

## 7b) Substrate preparation and guanidine formation

C:\Analytical\...11232018\SI

4.37

RT: 0.00 - 2.00 SM: 7B

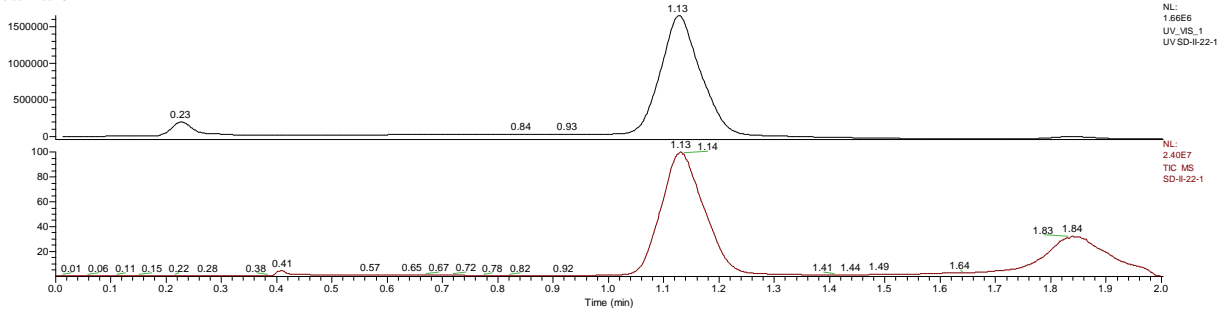

SD-II-22-1 #372-445 RT: 1.05-1.24 AV: 74 NL: 2.47E6  
T: ITMS - c ESI Full ms [500.00-2000.00]

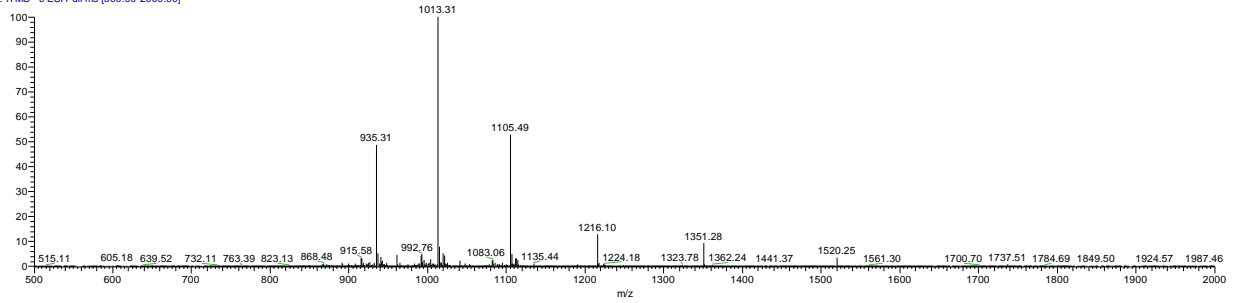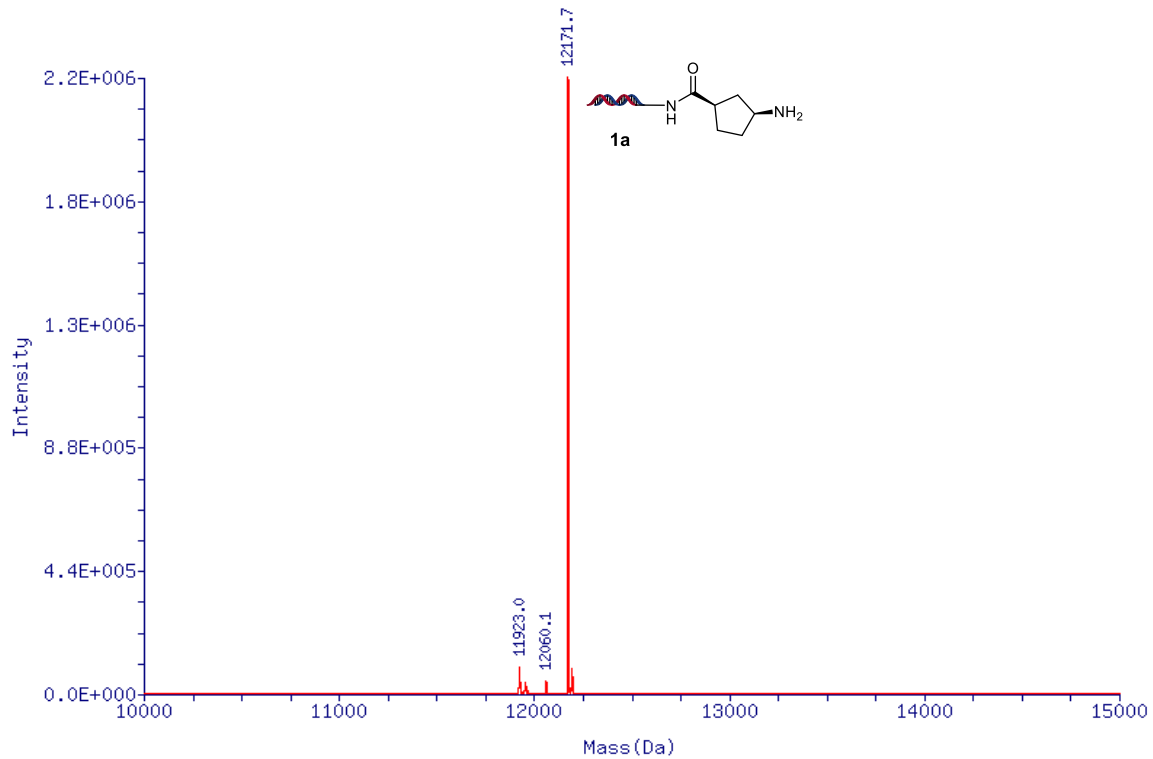

RT: 0.00 - 2.00 SM: 7B

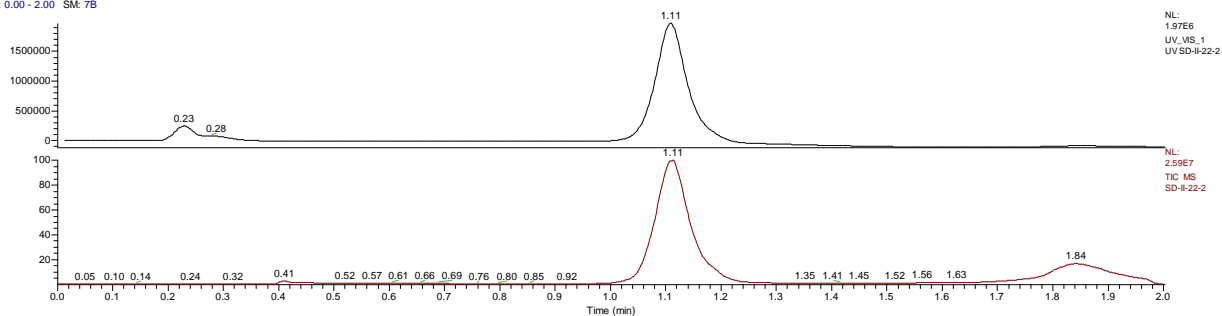

SD-II-22-2 #367-434 RT: 1.04-1.21 AV: 68 NL: 2.18E6  
T: ITMS - c ESI Full ms [500.00-2000.00]

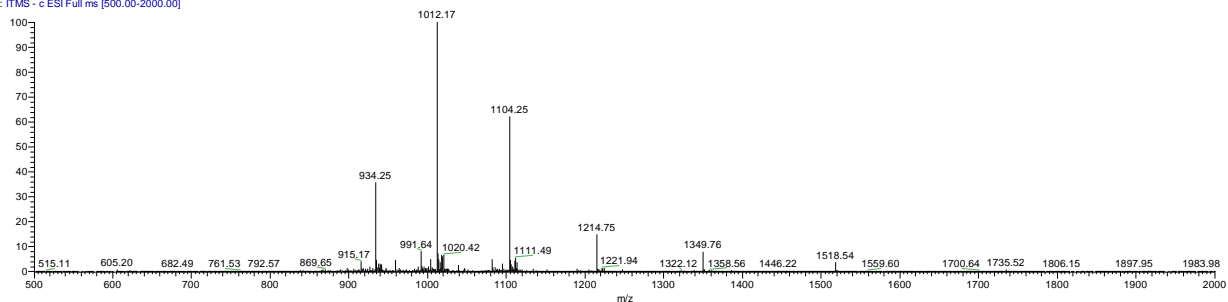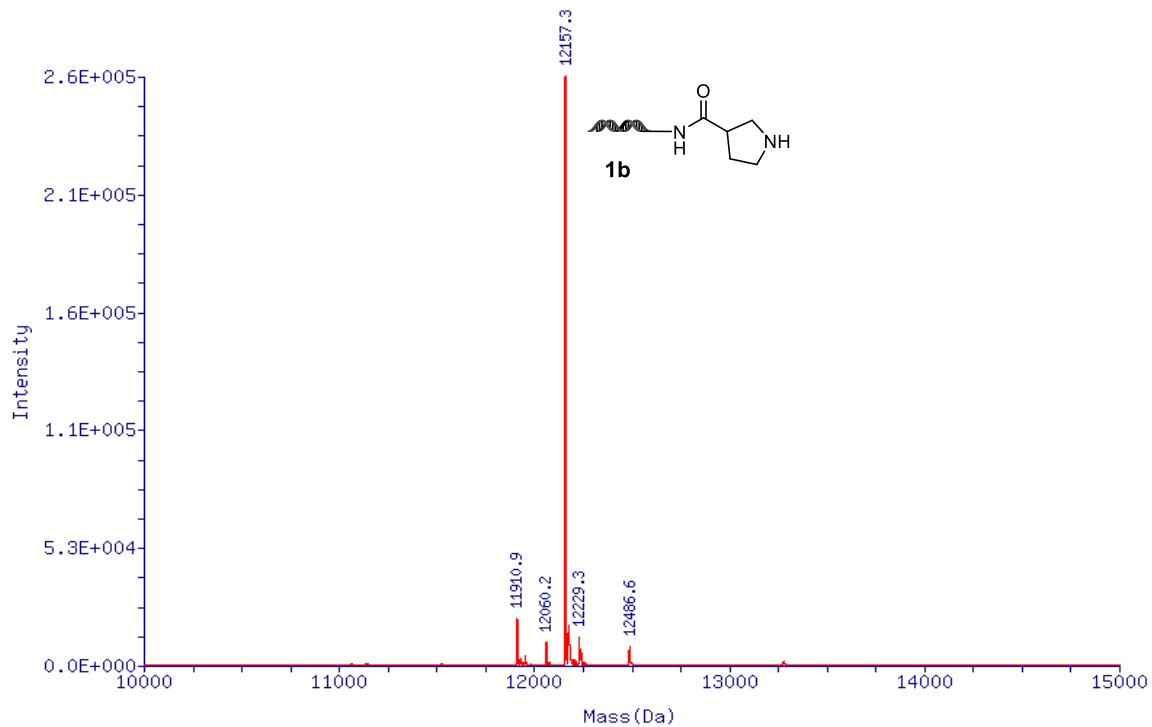

RT: 0.00 - 2.00 SM: 7B

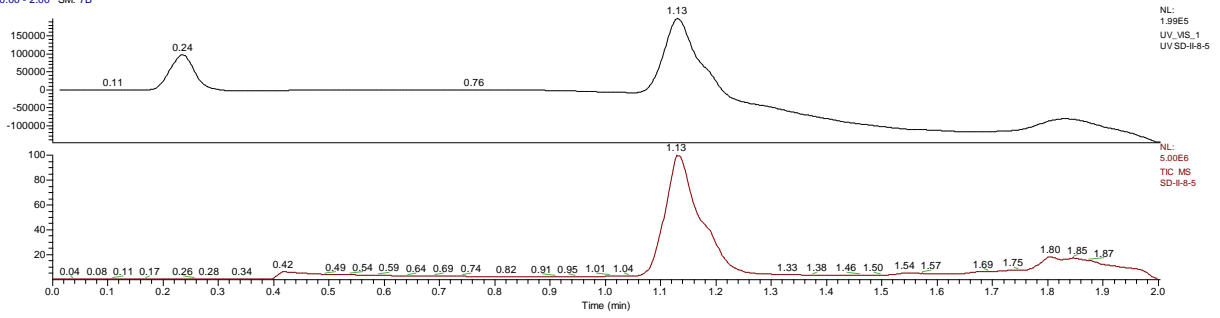

SD-II-8-5 #382-431 RT: 1.08-1.21 AV: 50 NL: 6.63E5  
T: ITMS - c ESI Full ms [500.00-2000.00]

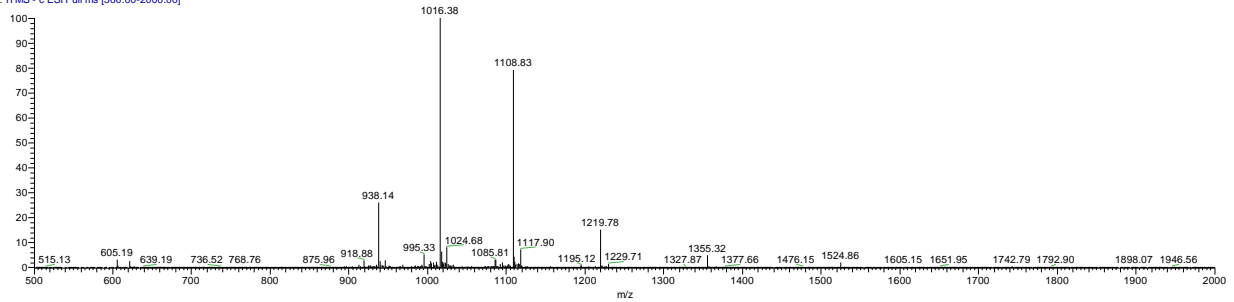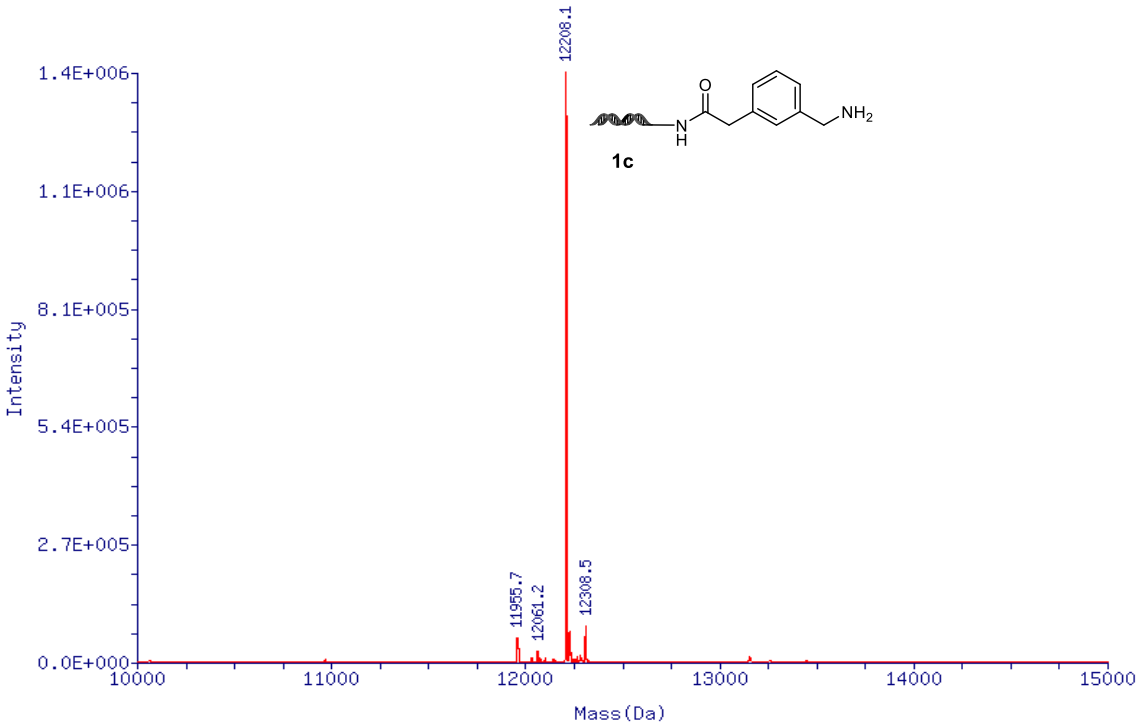

RT: 0.00 - 2.00 SM: 7B

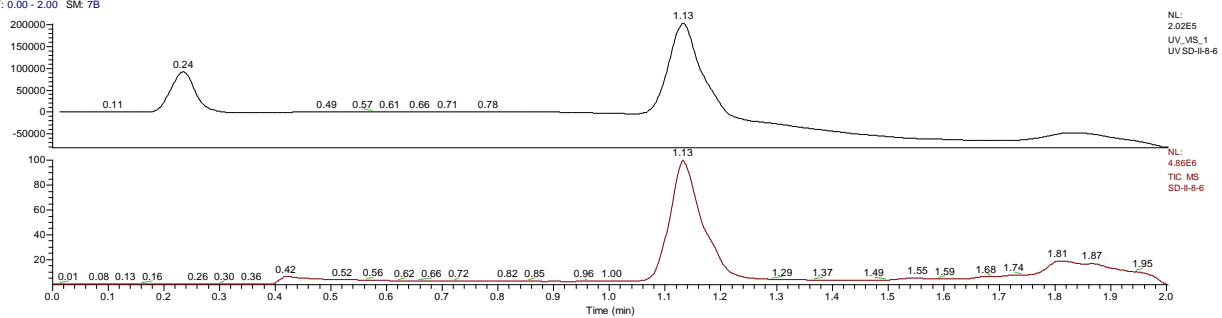SD-II-8-6 #381-434 RT: 1.08-1.22 AV: 54 NL: 5.89E5  
T: ITMS - c ESI Full ms [500.00-2000.00]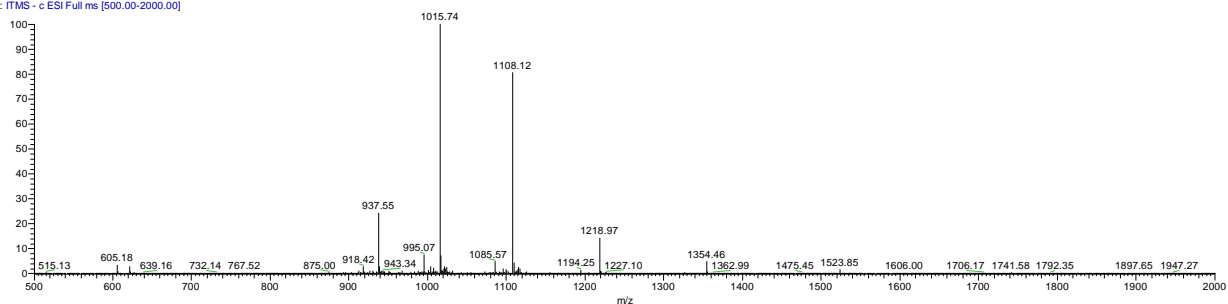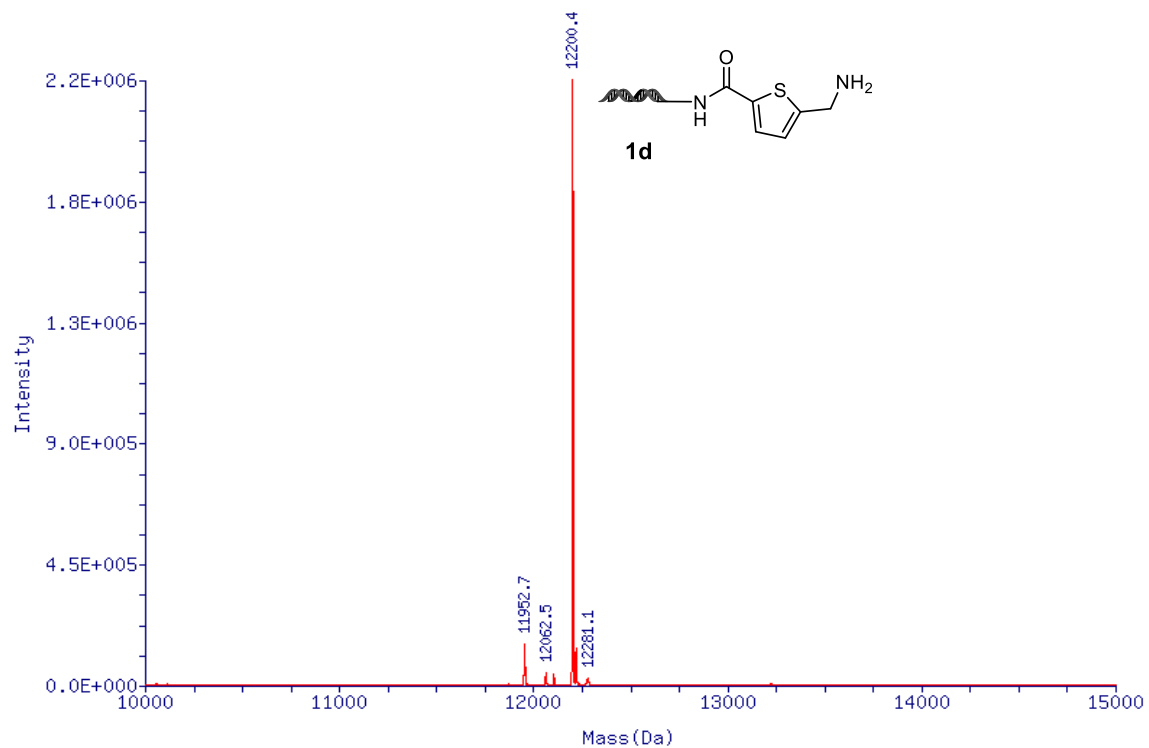

RT: 0.00 - 2.00 SM: 7B

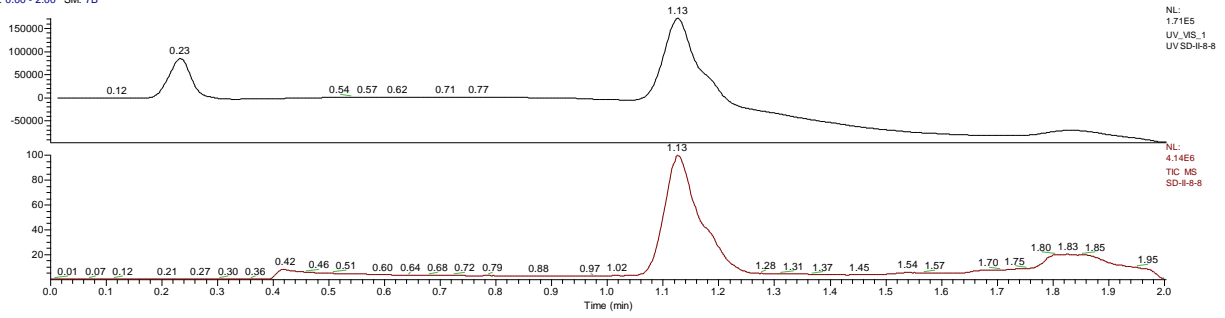

SD-II-8-8 #379-423 RT: 1.07-1.19 AV: 45 NL: 4.28E5  
T: ITMS - c ESI Full ms [500.00-2000.00]

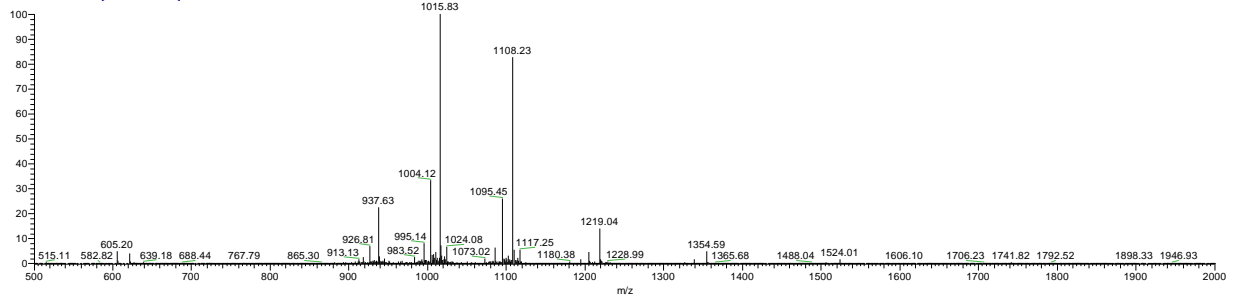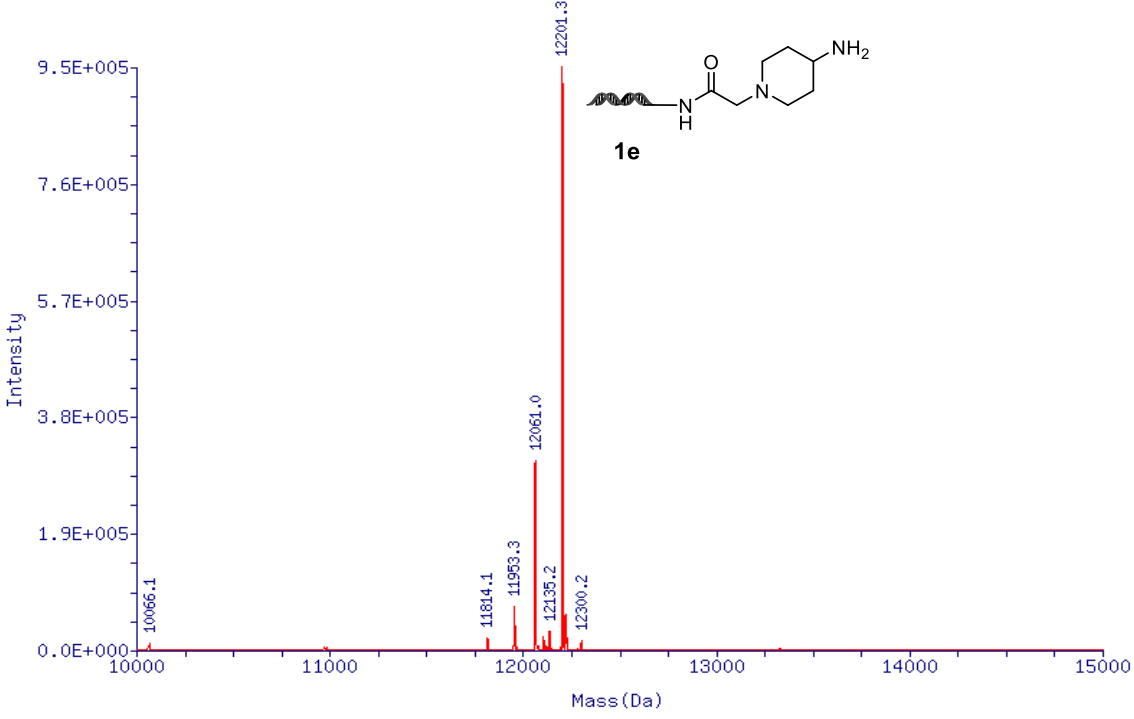

SD-II-28-3\_181203131056

1:36

RT: 0.00 - 2.00 SM: 7B

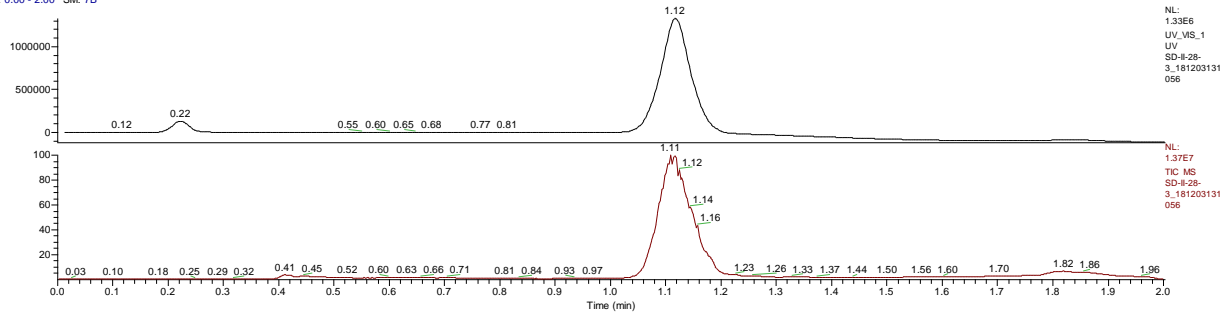

SD-II-28-3\_181203131056 #369-428 RT: 1.04-1.20 AV: 60 NL: 1.34E6  
T: ITMS - c ESI Full ms [500.00-2000.00]

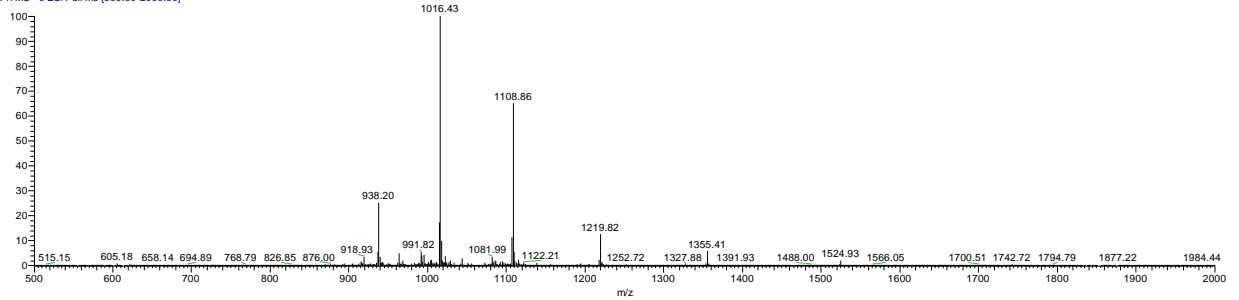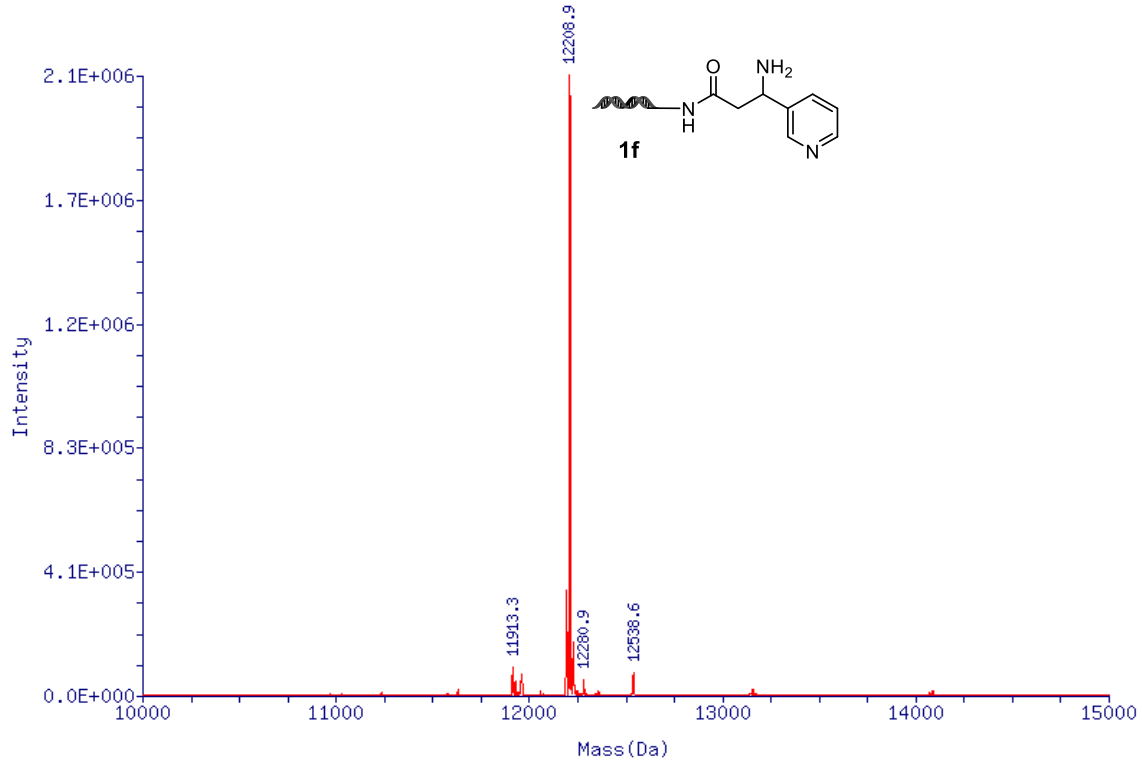



SD-II-28-2\_181203130813

8:51

RT: 0.00 - 2.00 SM: 7B

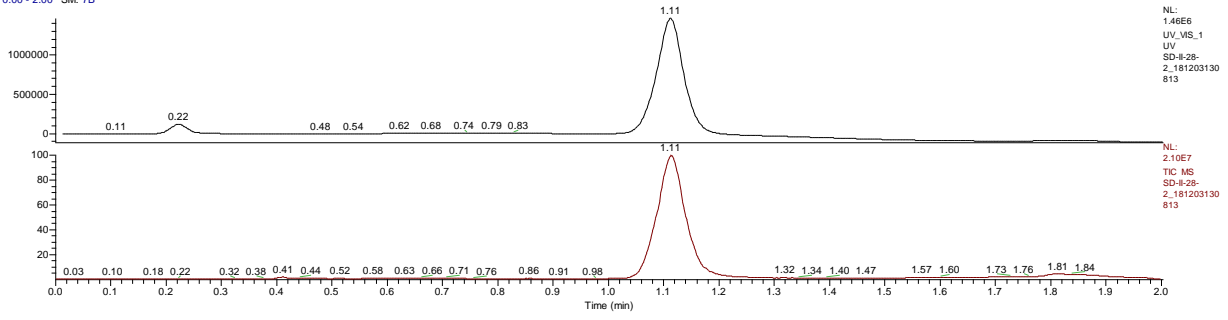

SD-II-28-2\_181203130813 #371-424 RT: 1.05-1.19 AV: 54 NL: 1.98E6  
T: FTMS - c ESI Full ms [500.00-2000.00]

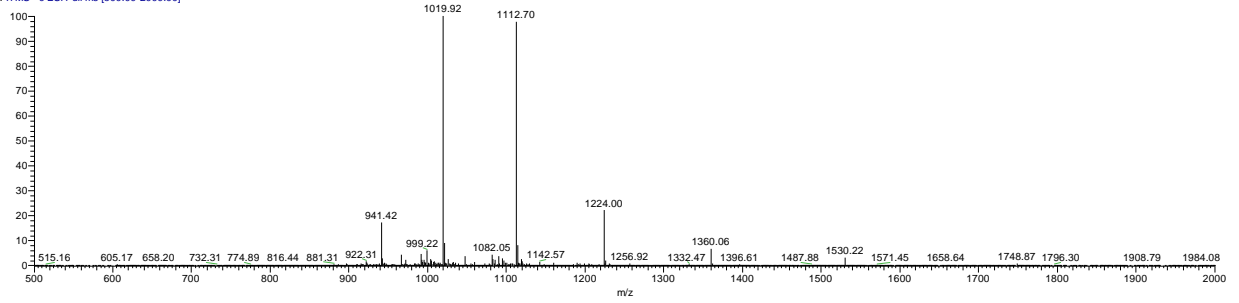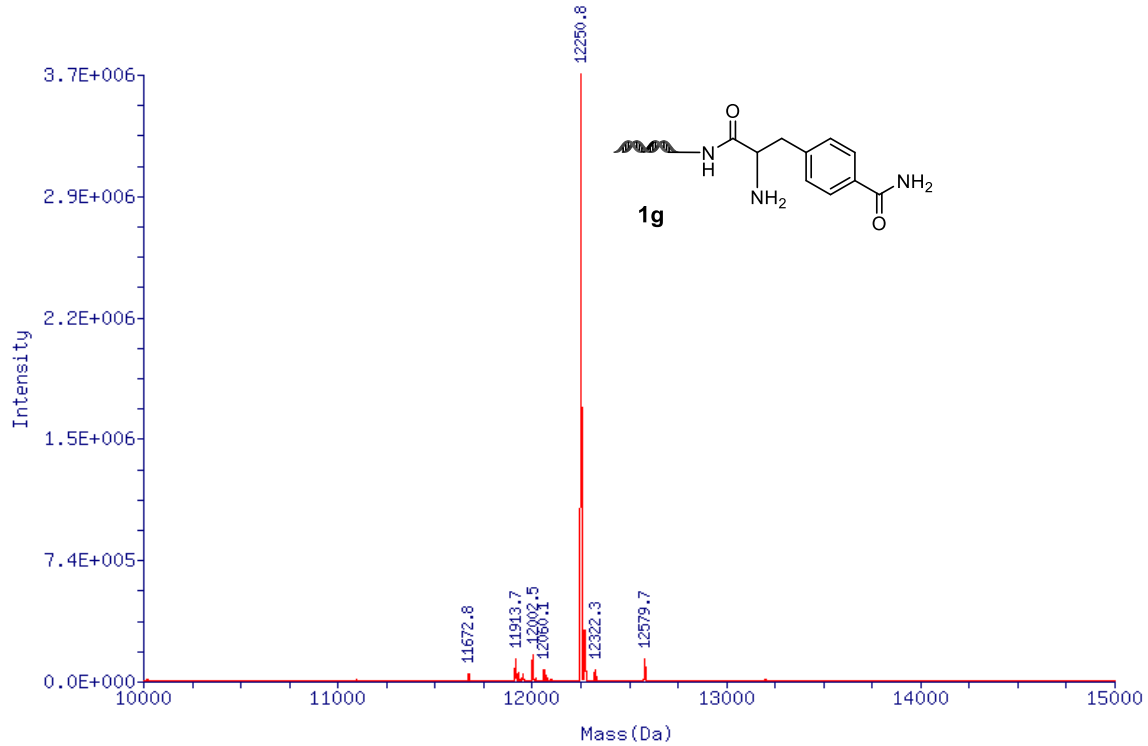

SD-II-28-5\_181203131624

7:04

RT: 0.00 - 2.00 SM: 7B

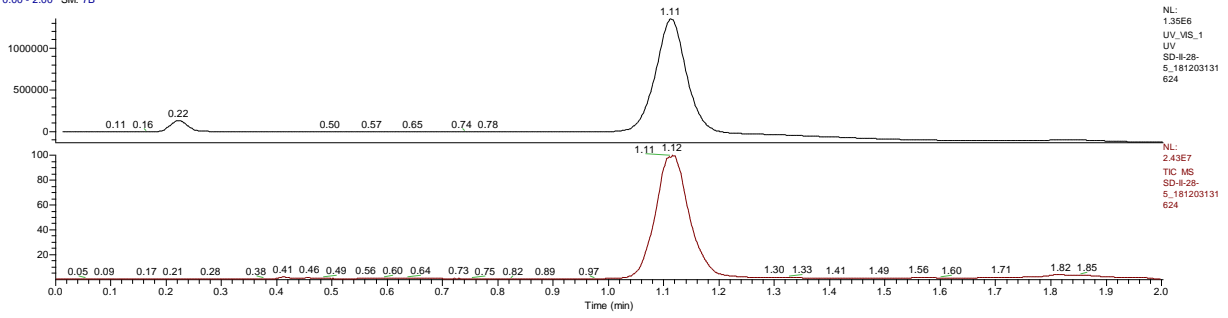

SD-II-28-5\_181203131624 #372-424 RT: 1.05-1.19 AV: 53 NL: 1.17E6  
T: ITMS - c ESI Full ms [500.00-2000.00]

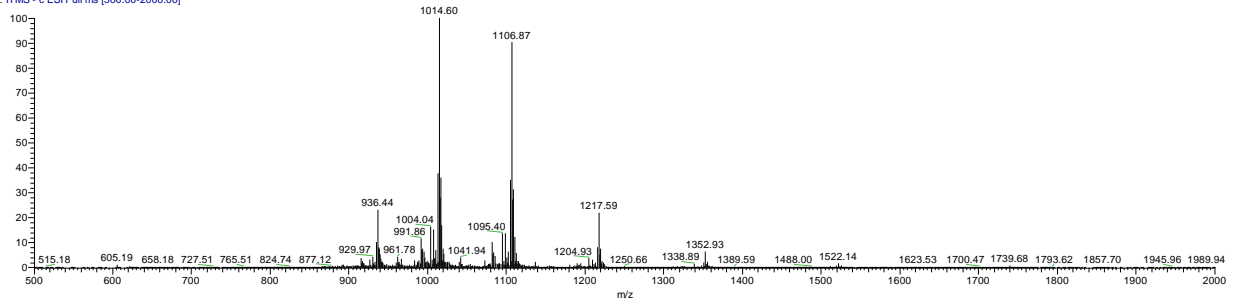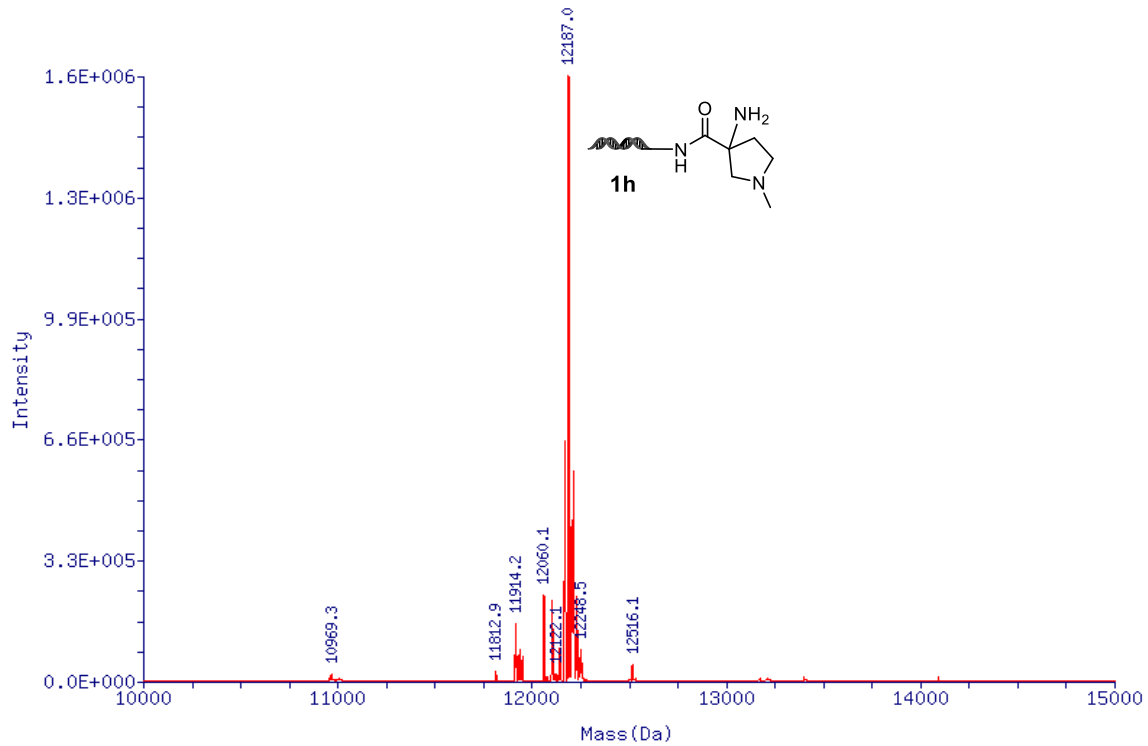

RT: 0.00 - 2.00 SM: 7B

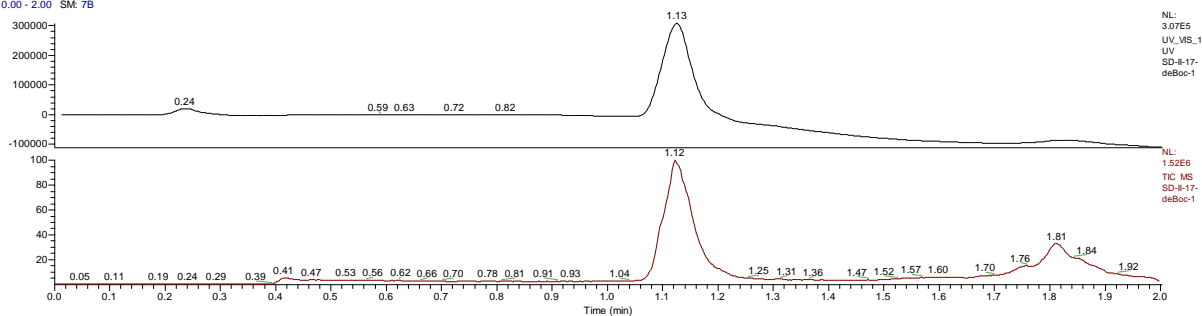

SD-II-17-deBoc-1 #378-438 RT: 1.07-1.23 AV: 61 NL: 1.28E5  
T: ITMS - c ESI Full ms [500.00-2000.00]

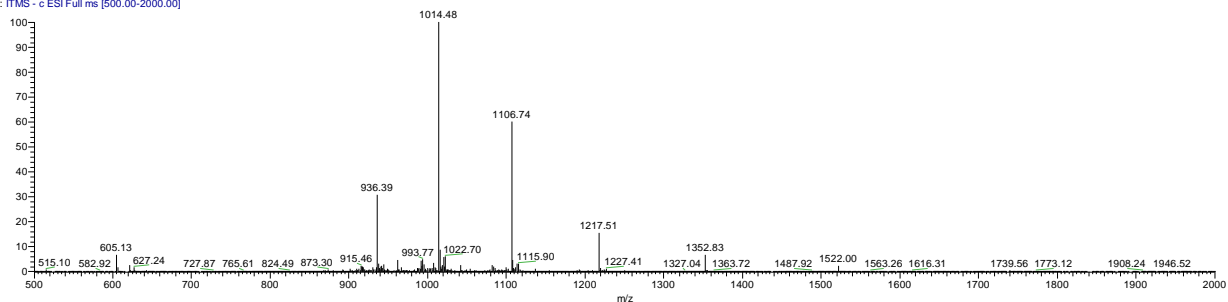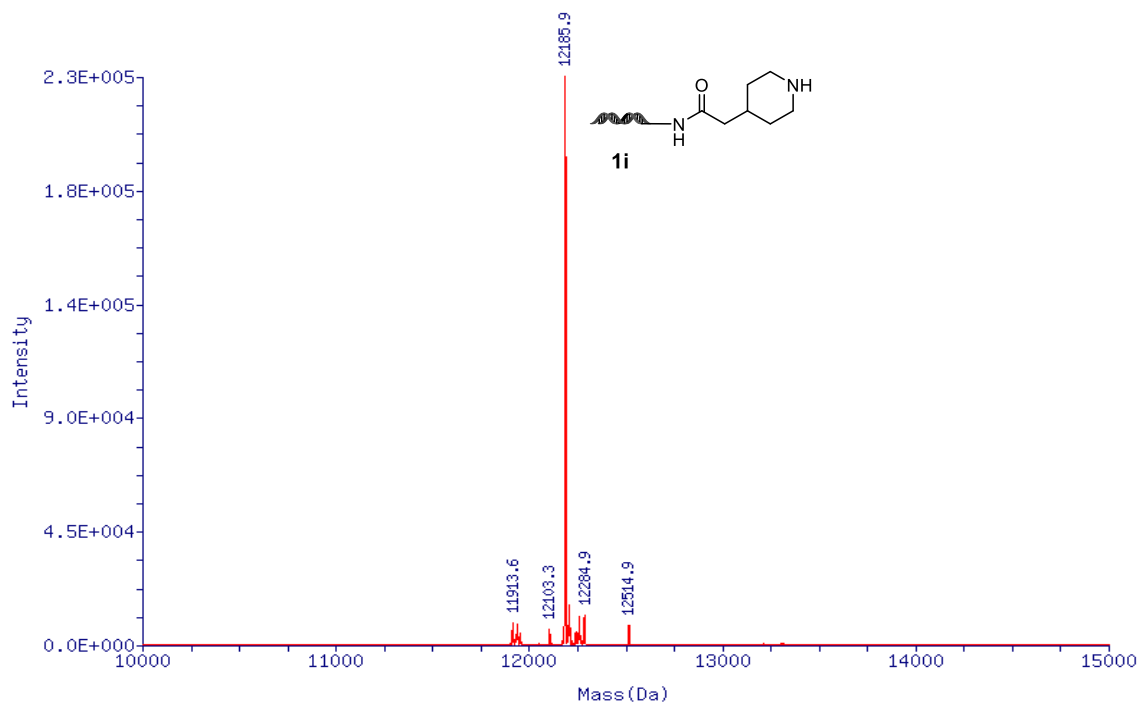

RT: 0.00 - 2.00 SM: 7B

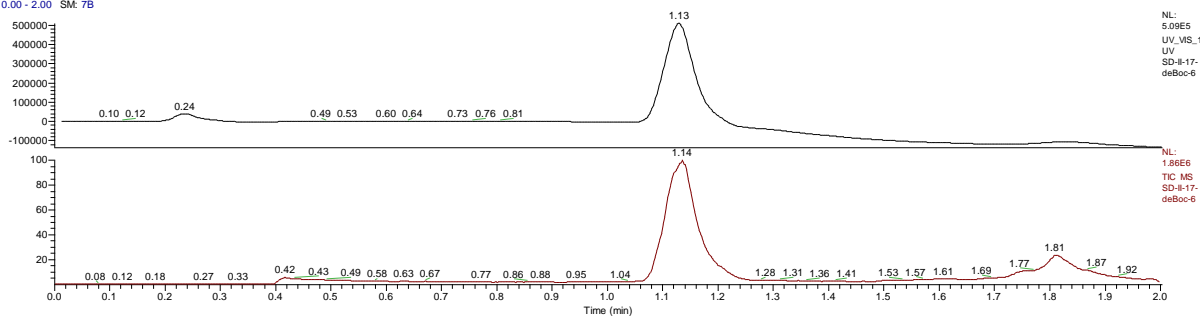

SD-II-17-deBoc-6 #378-437 RT: 1.07-1.23 AV: 60 NL: 1.64E5  
T: ITMS - c ESI Full ms [500.00-2000.00]

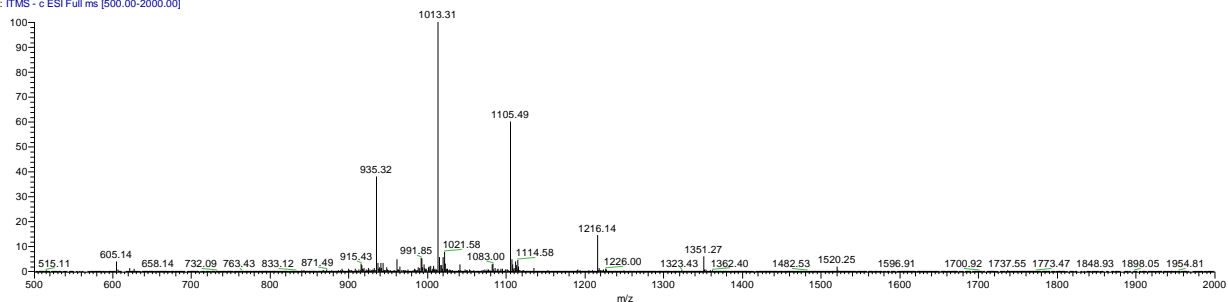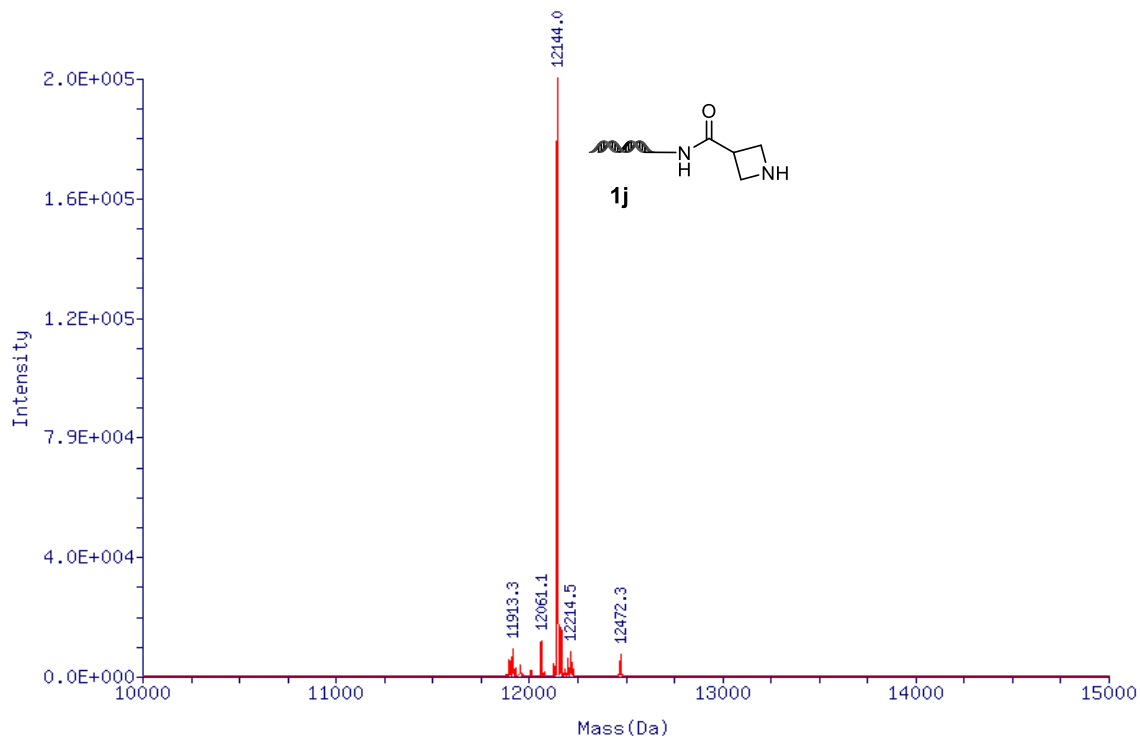

RT: 0.00 - 2.00 SM: 7B

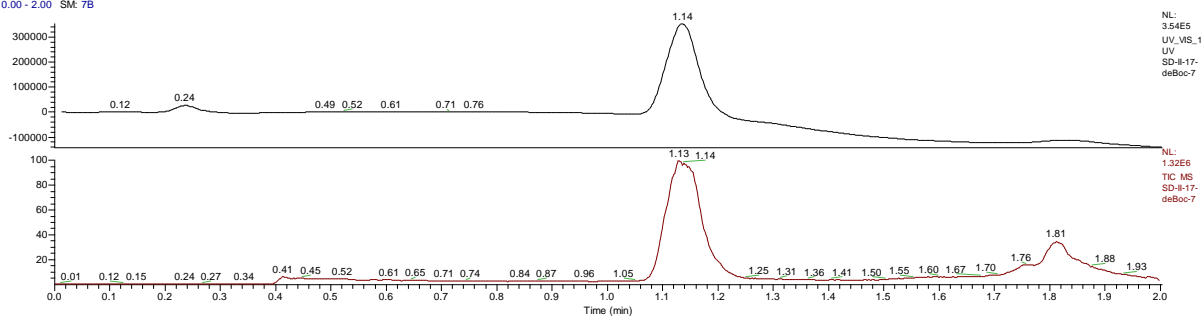

SD-II-17-deBoc-7 #381-444 RT: 1.07-1.25 AV: 64 NL: 1.14E5  
T: ITMS - c ESI Full ms [500.00-2000.00]

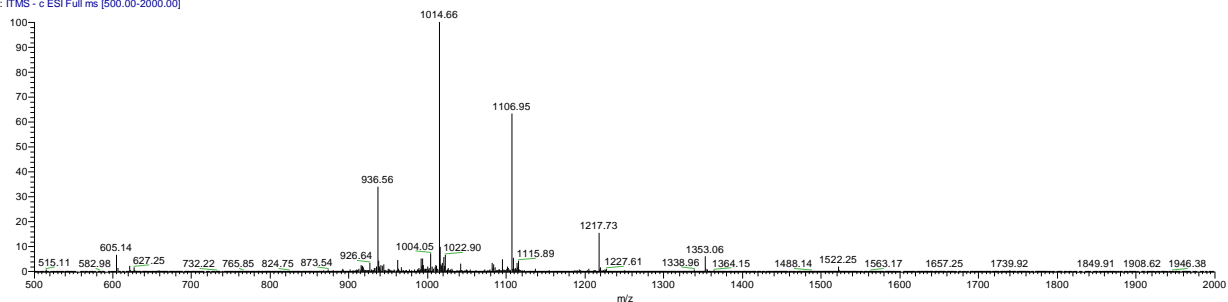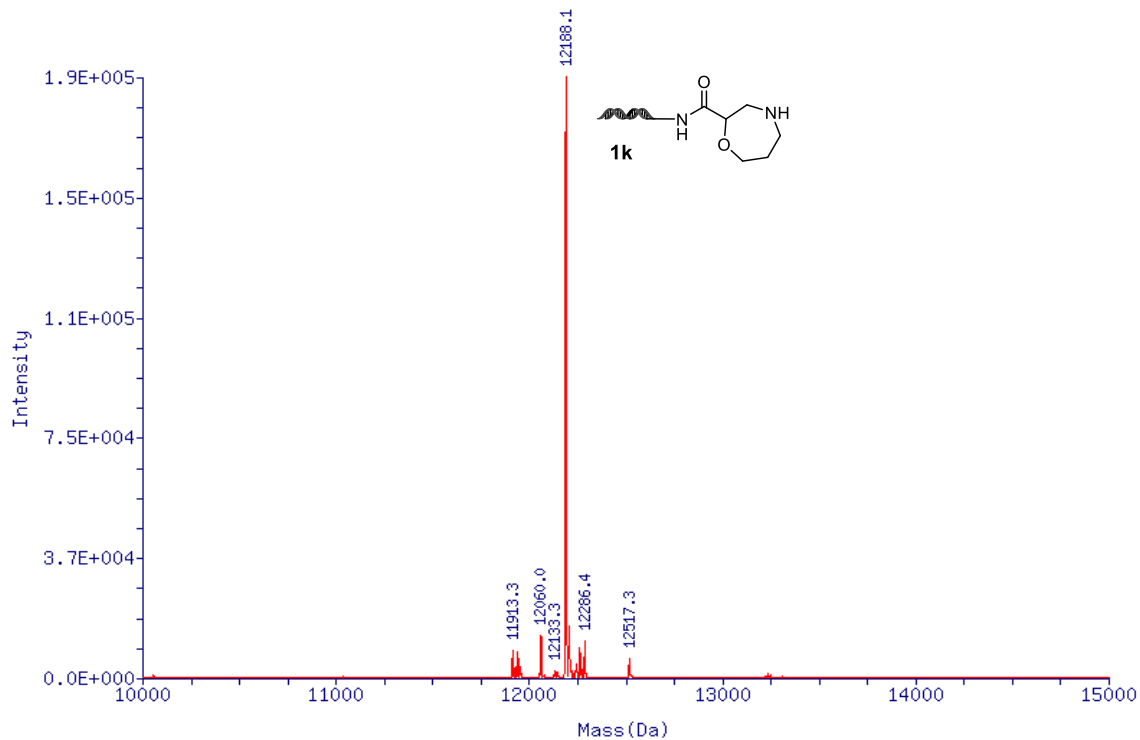

SD-II-28-6\_181203131909

9.47

RT: 0.00 - 2.00 SM: 7B

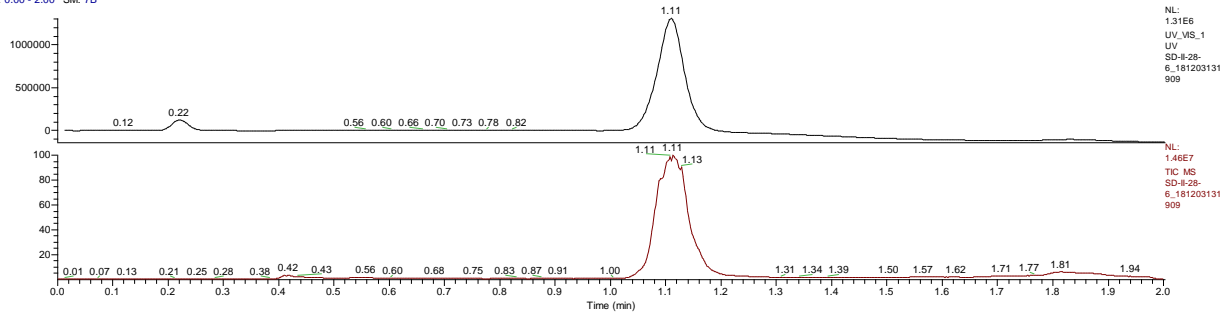

SD-II-28-6\_181203131909 #373-426 RT: 1.05-1.19 AV: 54 NL: 1.44E6  
T: FTMS - c ESI Full ms [500.00-2000.00]

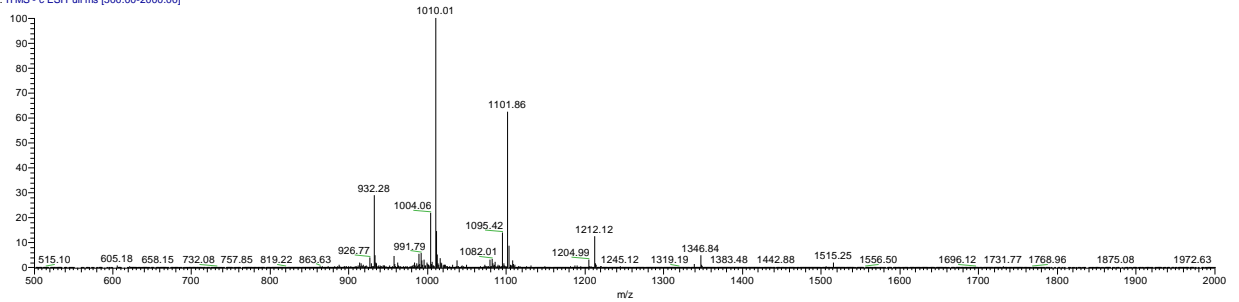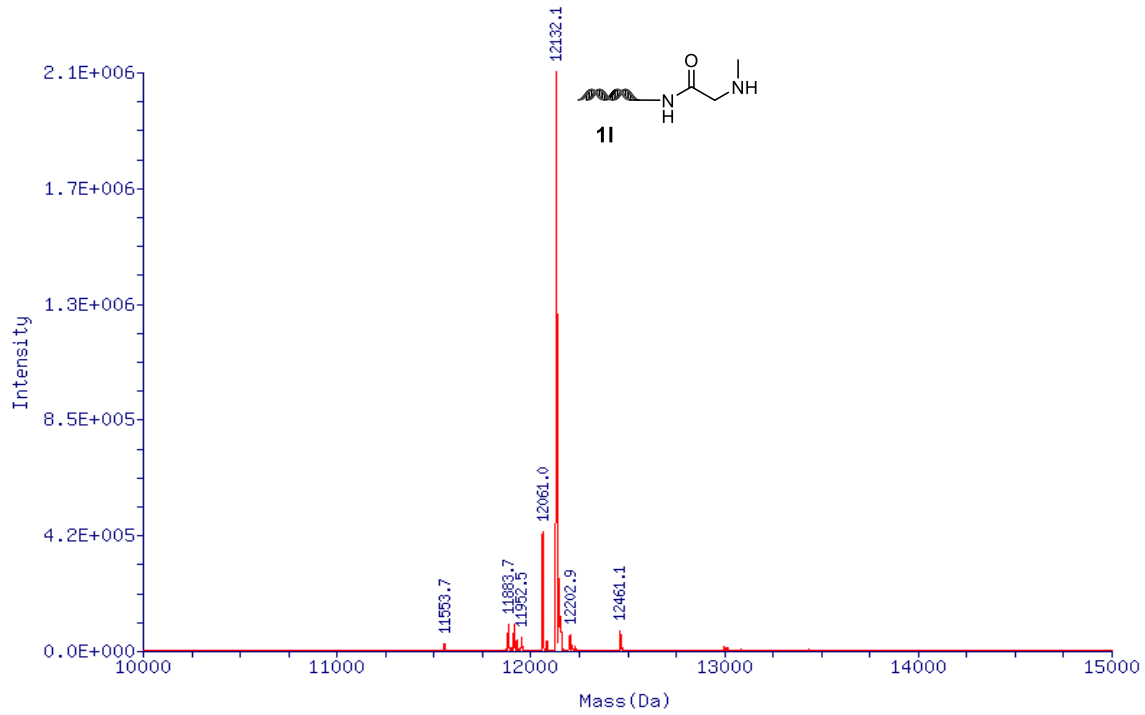

SD-II-28-7\_181203132152

2:32

RT: 0.00 - 2.00 SM: 7B

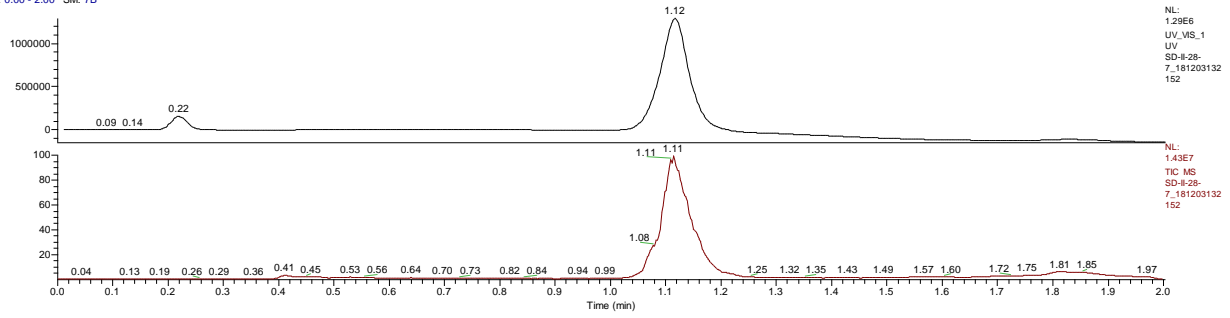

SD-II-28-7\_181203132152 #377-431 RT: 1.06-1.21 AV: 55 NL: 1.49E6  
T: ITMS - c ESI Full ms [500.00-2000.00]

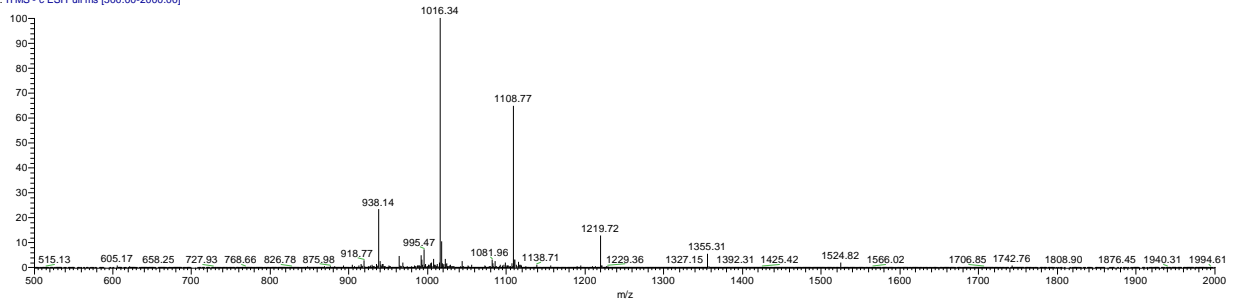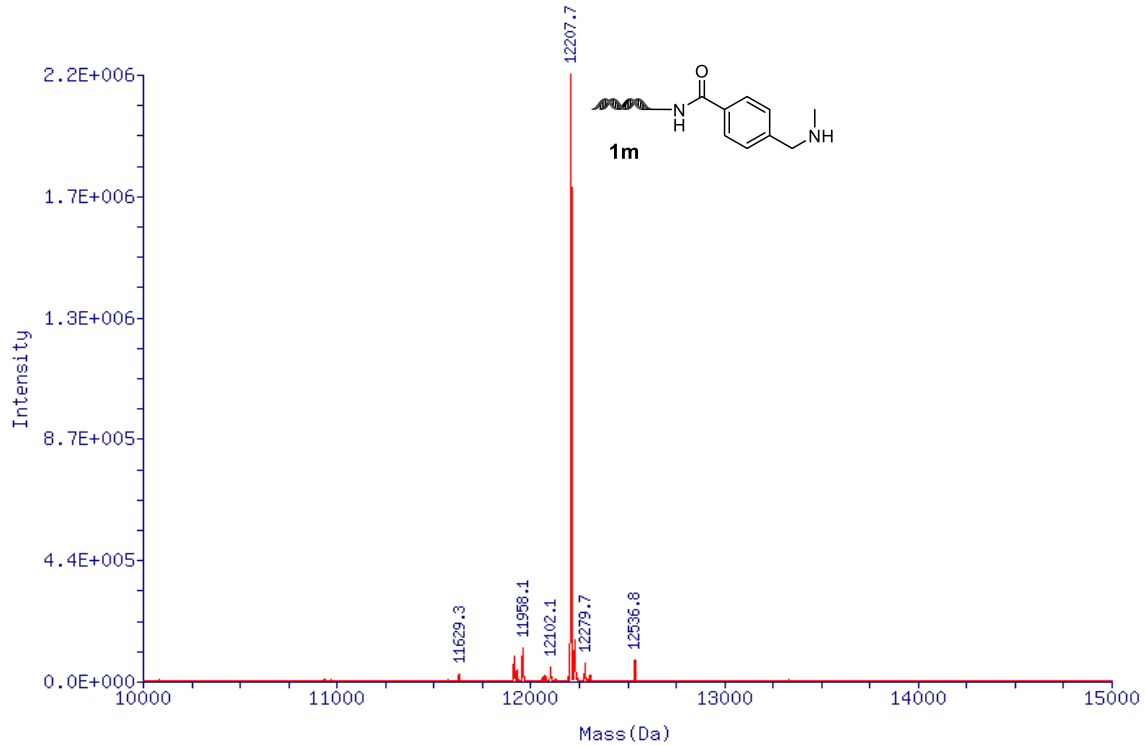

SD-II-28-10\_181203133005

0:45

RT: 0.00 - 2.00 SM: 7B

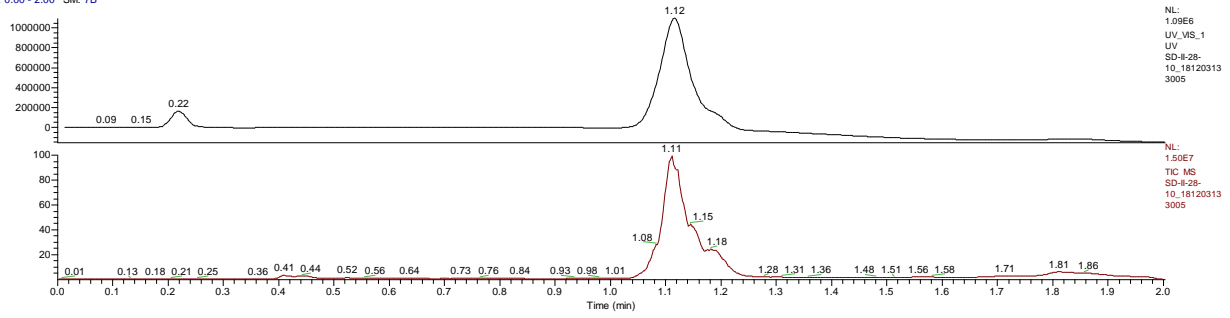

SD-II-28-10\_181203133005 #374-435 RT: 1.06-1.22 AV: 62 NL: 1.10E6  
T: ITMS - c ESI Full ms [500.00-2000.00]

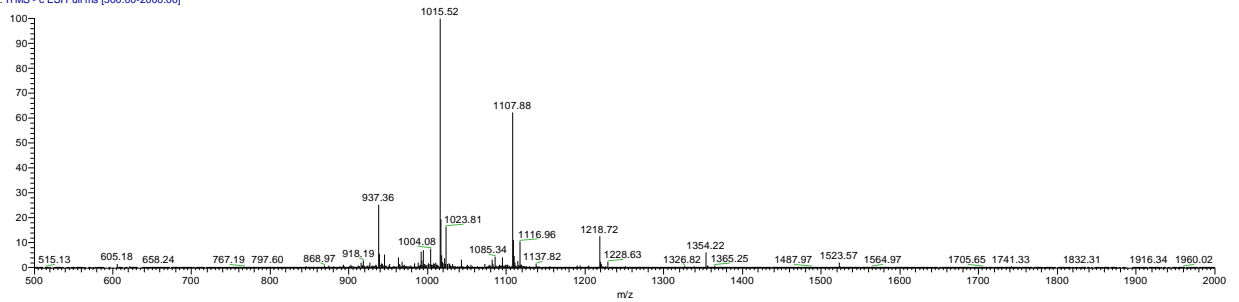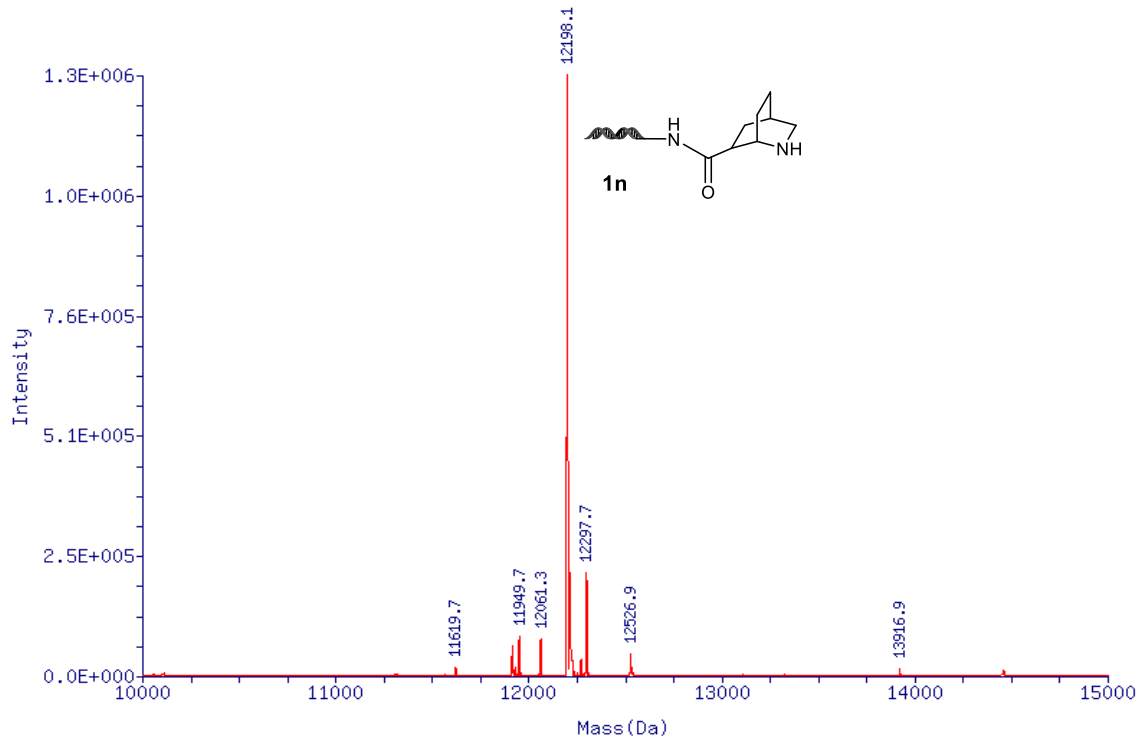



SD-II-34-4\_181210135841

9:21

RT: 0.00 - 2.00 SM: 7B

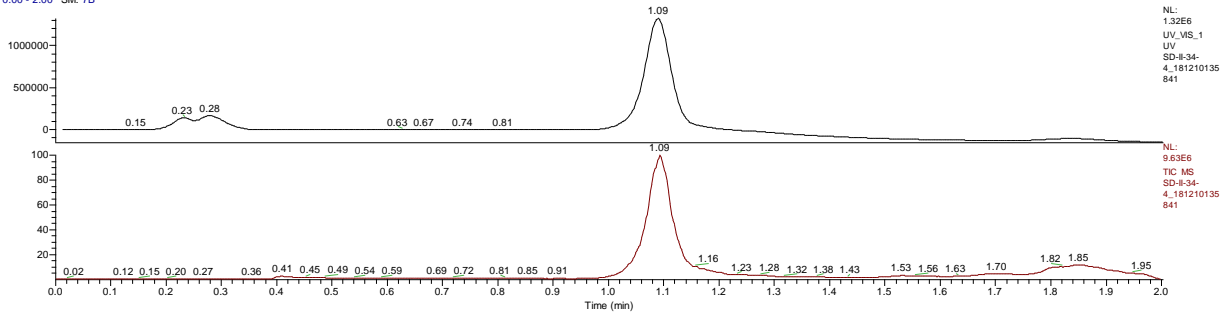

SD-II-34-4\_181210135841 #362-414 RT: 1.02-1.16 AV: 53 NL: 9.94E5  
T: FTMS - c ESI Full ms [500.00-2000.00]

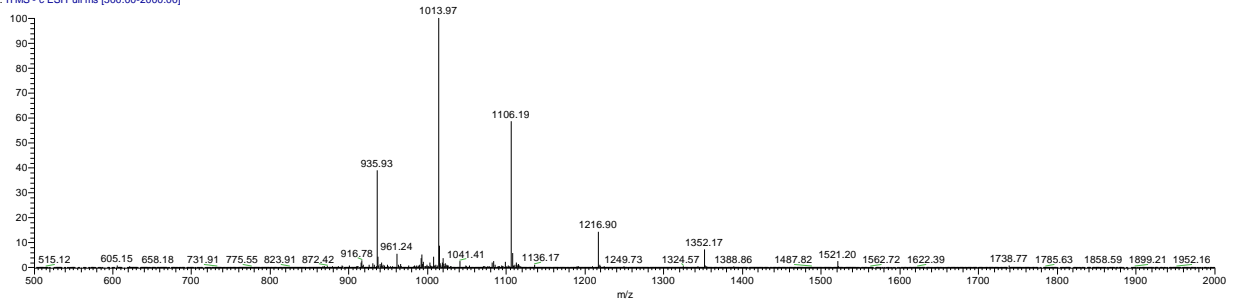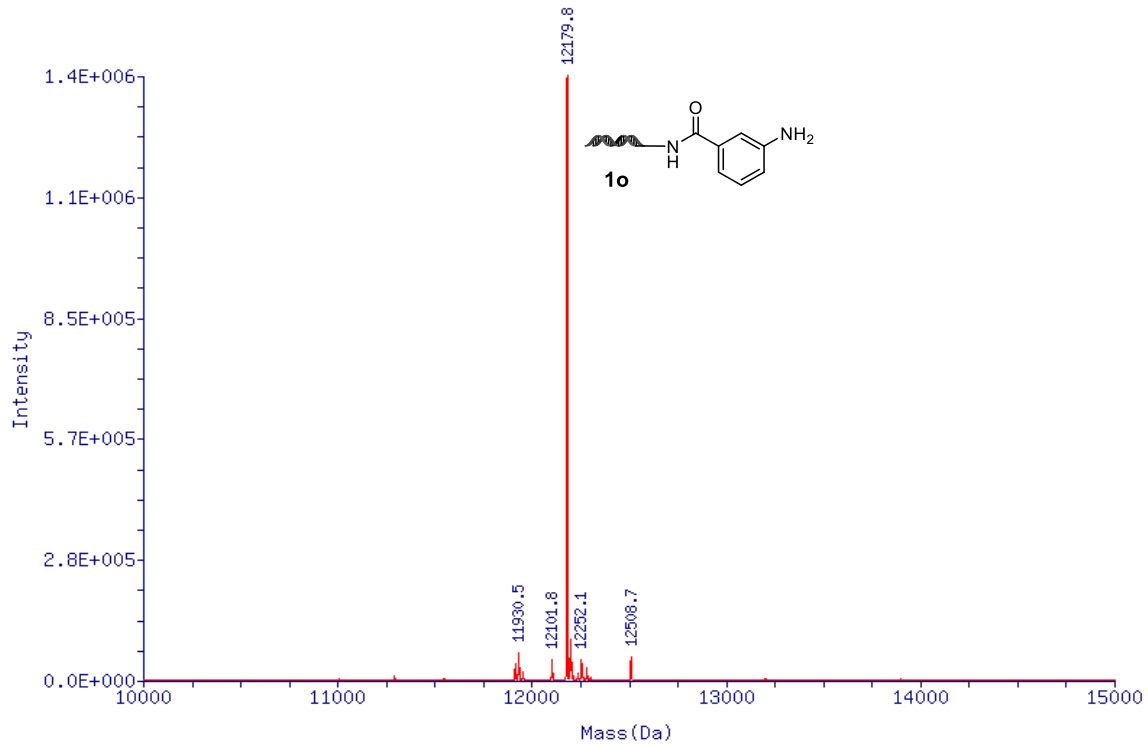

RT: 0.00 - 2.00 SM: 7B

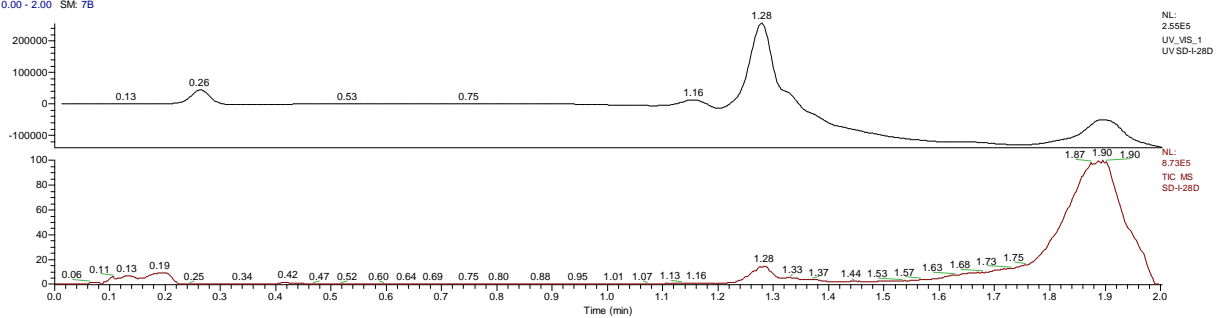

SD-I-28D #440-464 RT: 1.24-1.31 AV: 25 NL: 1.75E4  
T: ITMS - c ESI Full ms [500.00-2000.00]

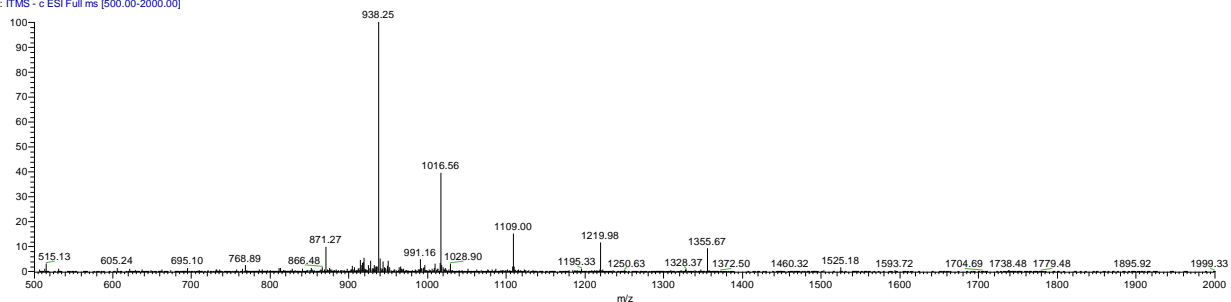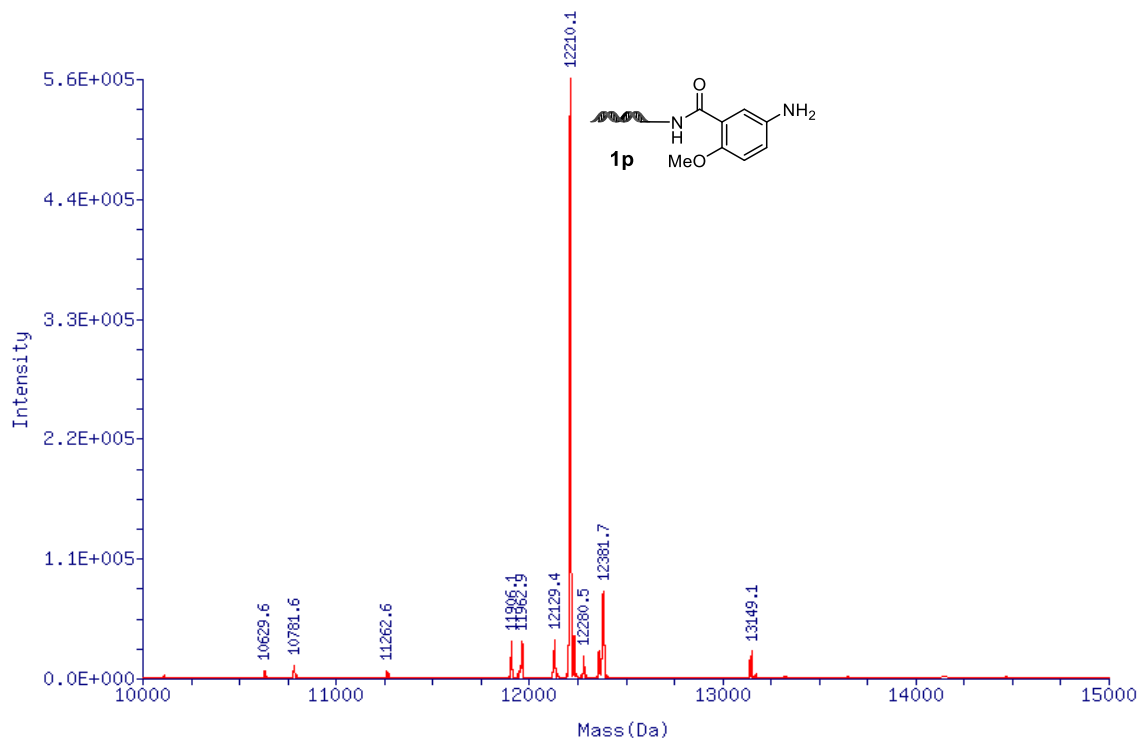

SD-II-28-11\_181203133250

3.36

RT: 0.00 - 2.00 SM: 7B

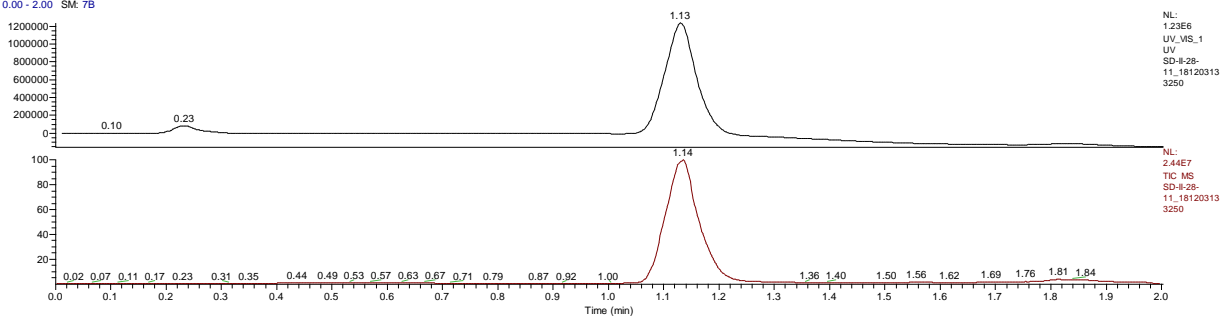

SD-II-28-11\_181203133250 #377-440 RT: 1.06-1.23 AV: 64 NL: 2.40E6  
T: FTMS - c ESI Full ms [500.00-2000.00]

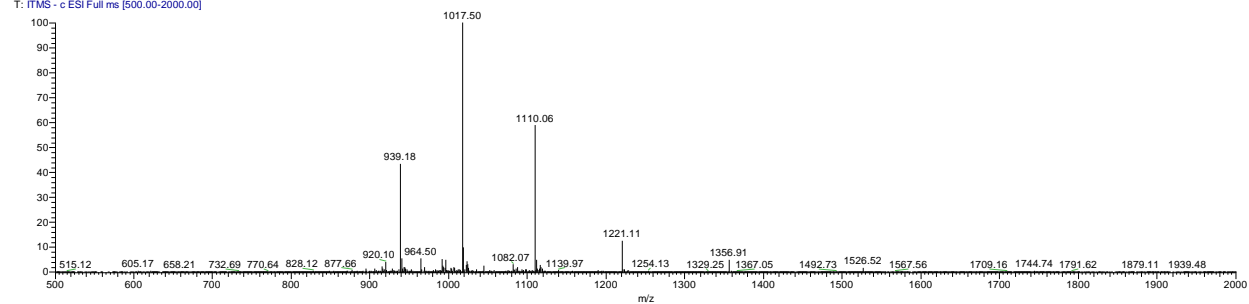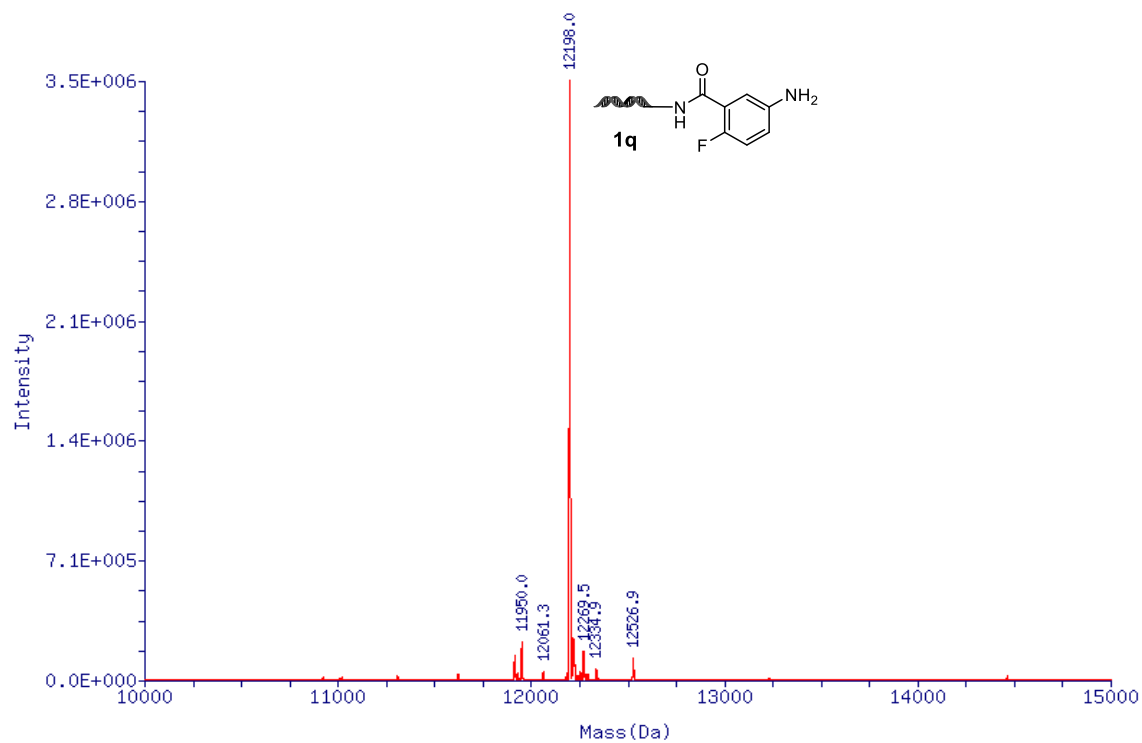

SD-II-28-14\_181203134115

2:01

RT: 0.00 - 2.00 SM: 7B

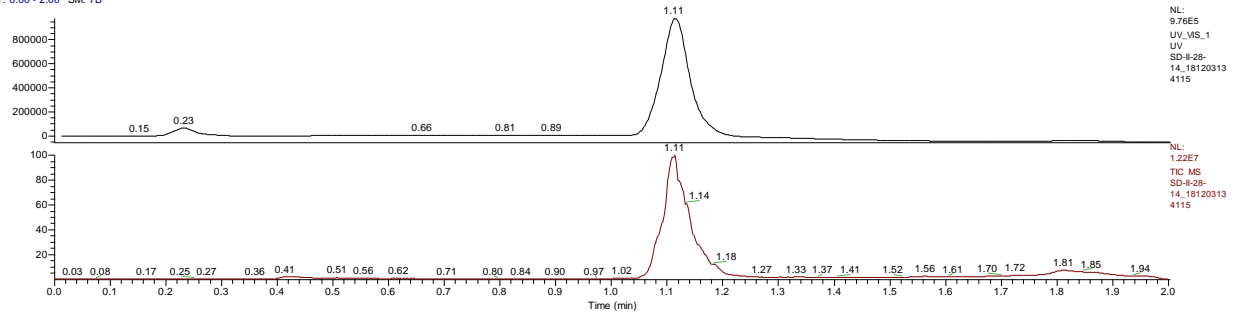

SD-II-28-14\_181203134115 #373-427 RT: 1.05-1.20 AV: 55 NL: 1.04E6  
T: ITMS - c ESI Full ms [500.00-2000.00]

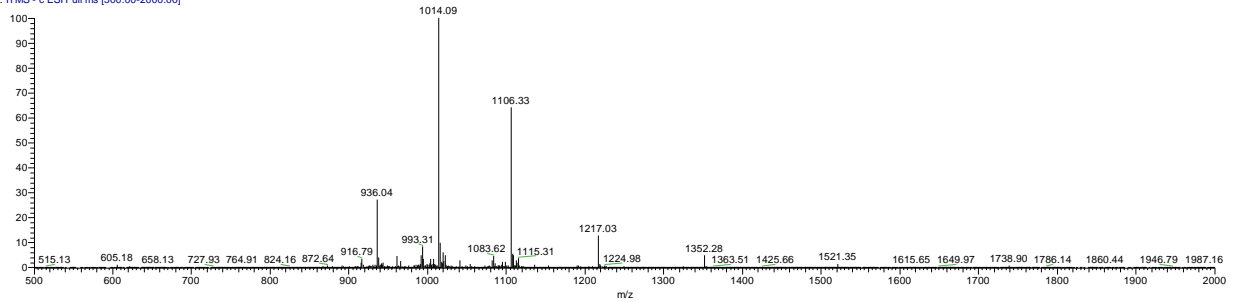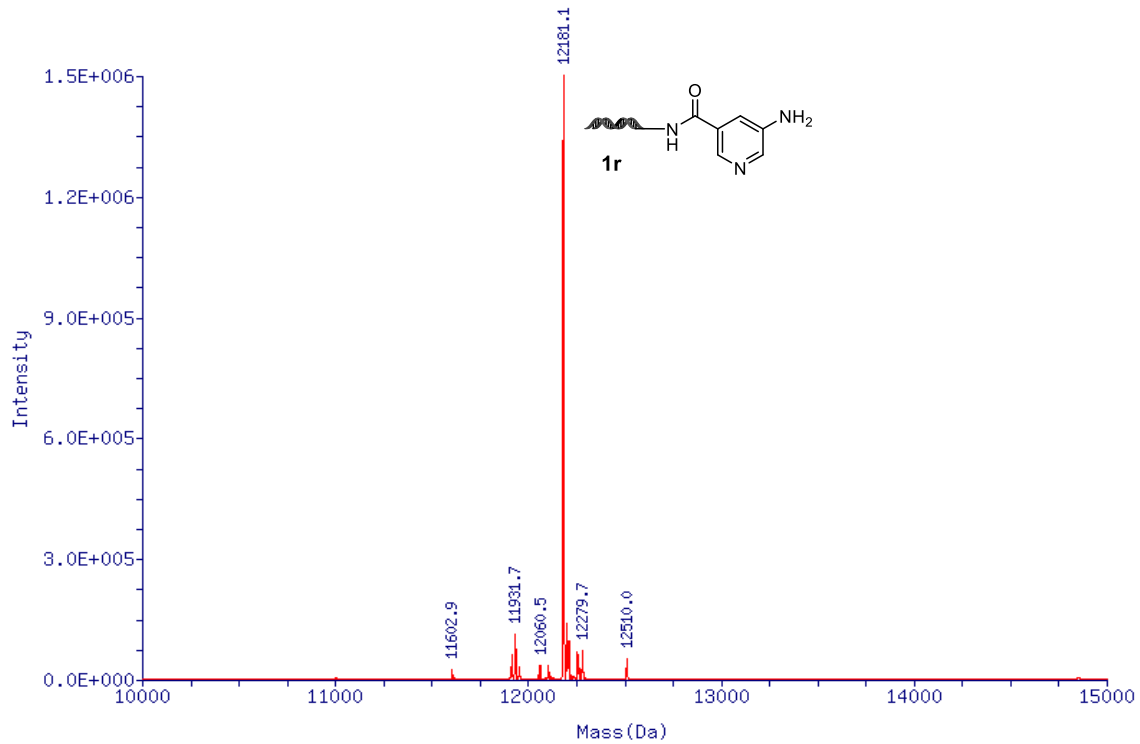

SD-II-28-11\_181203133250

3:36

RT: 0.00 - 2.00 SM: 7B

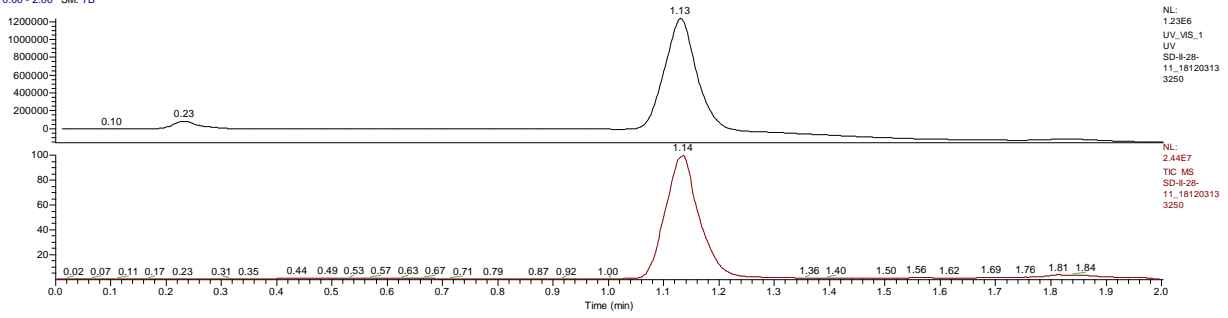

SD-II-28-11\_181203133250 #375-437 RT: 1.06-1.22 AV: 63 NL: 2.43E6  
T: ITMS - c ESI Full ms [500.00-2000.00]

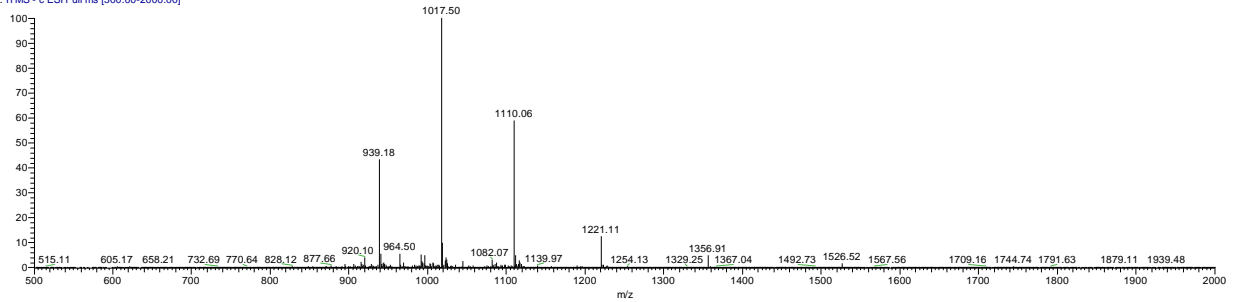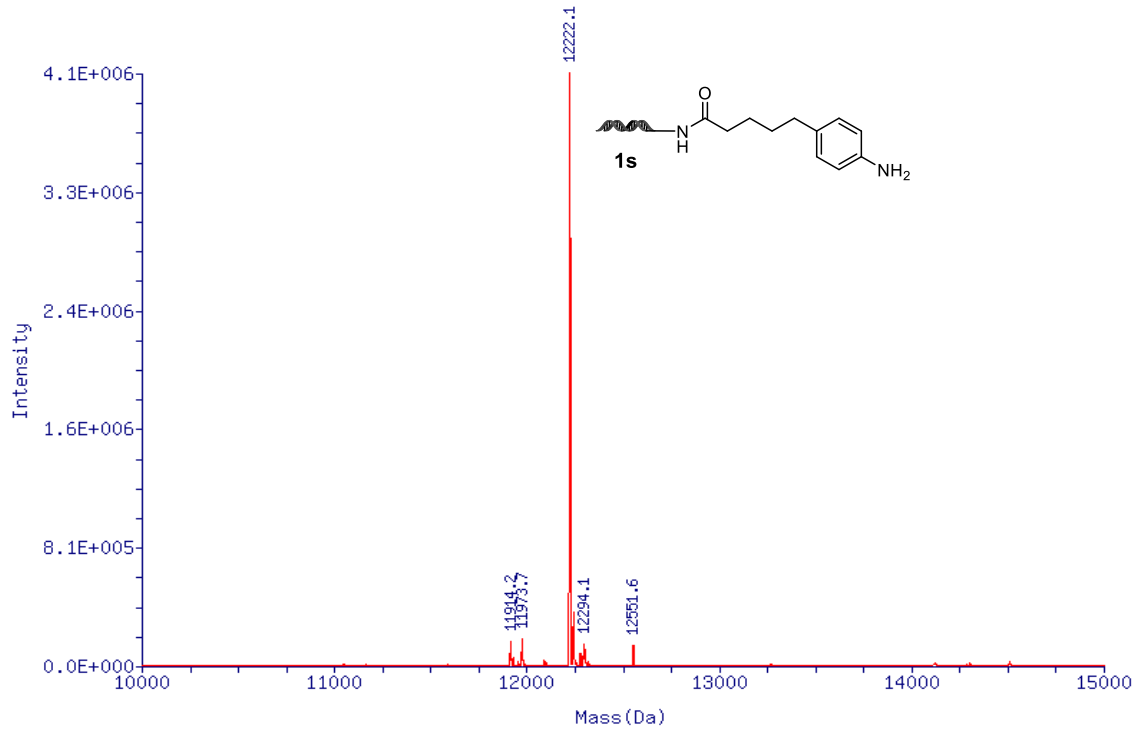

SD-II-34-2\_181210135307

3:53

RT: 0.00 - 2.00 SM: 7B

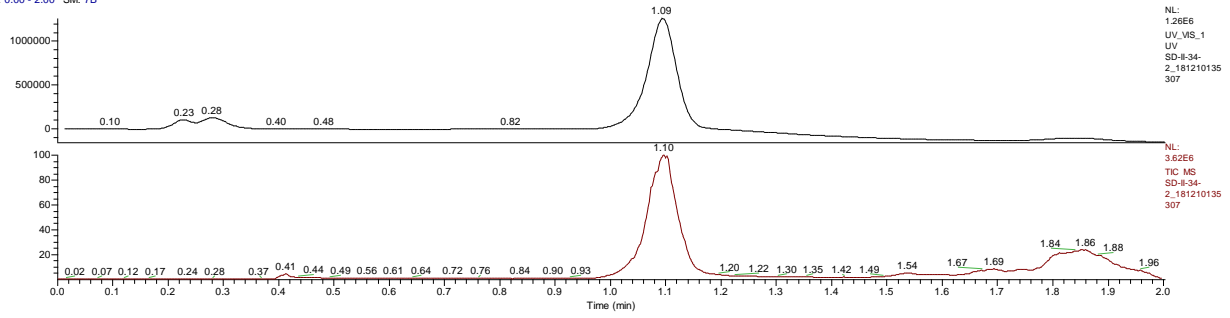

SD-II-34-2\_181210135307 #358-421 RT: 1.01-1.18 AV: 64 NL: 3.60E5  
T: FTMS - c ESI Full ms [500.00-2000.00]

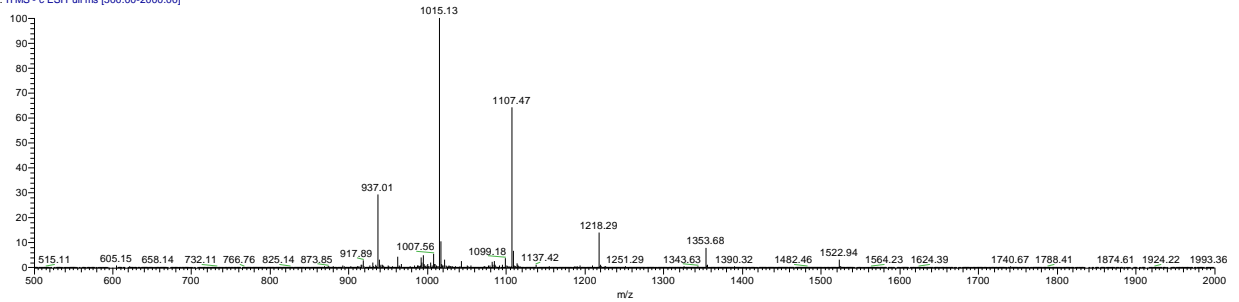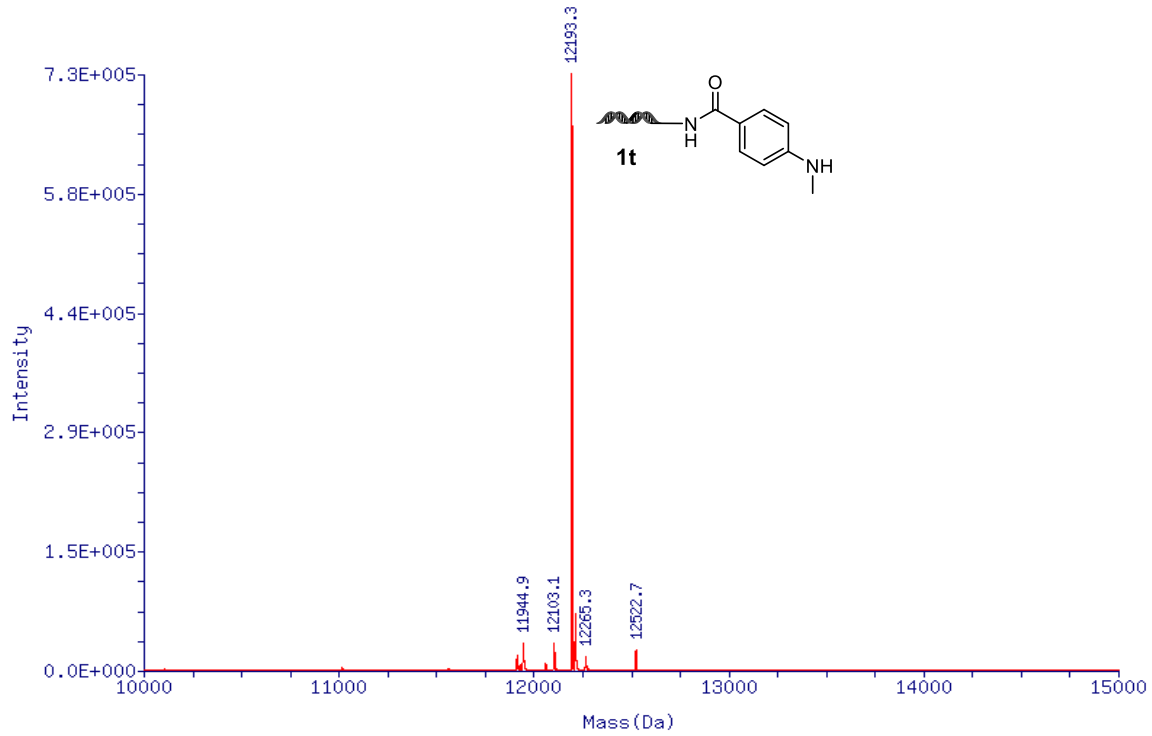

RT: 0.00 - 2.00 SM: 7B

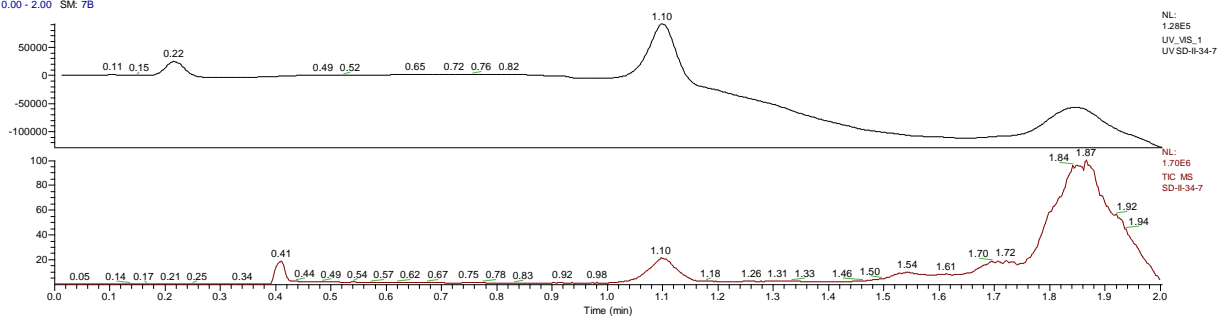

SD-II-34-7 #376-405 RT: 1.06-1.14 AV: 30 NL: 5.58E4  
T: FTMS - c ESI Full ms [500.00-2000.00]

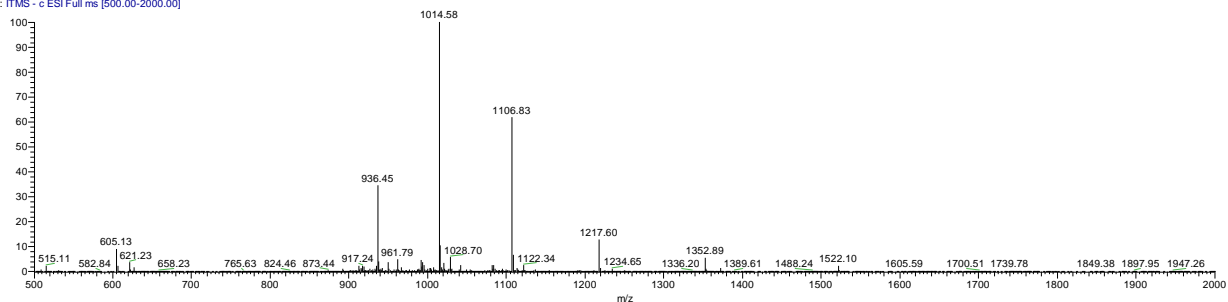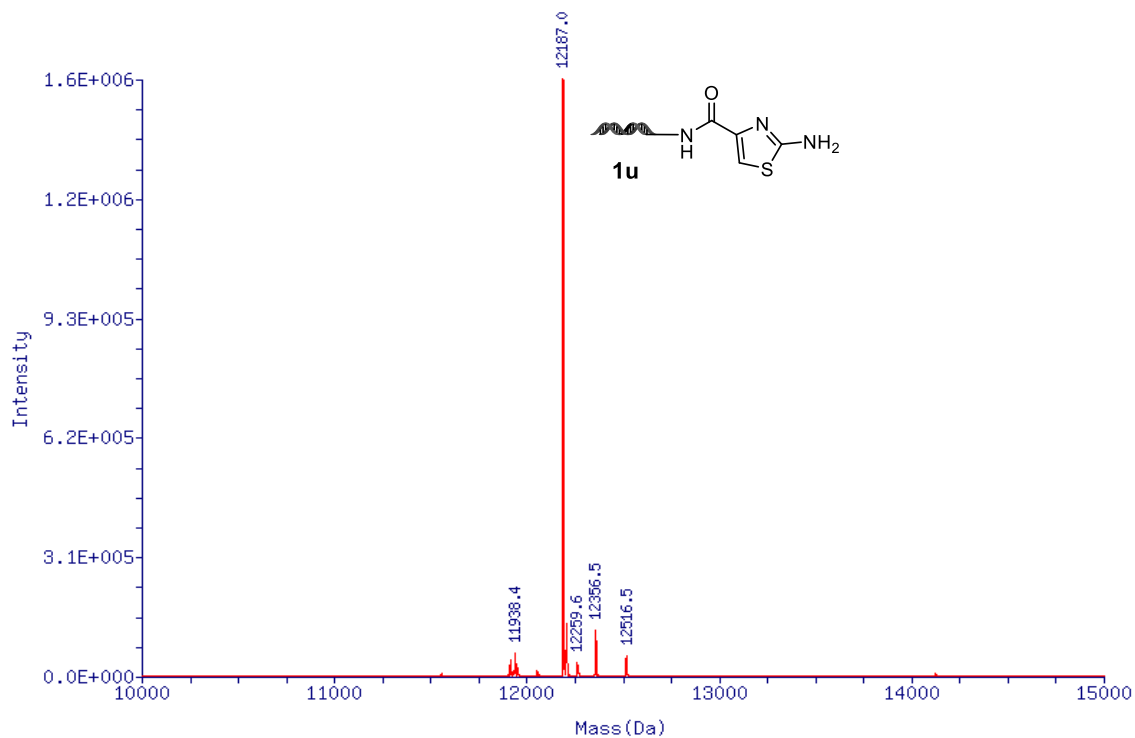

RT: 0.00 - 2.00 SM: 7B

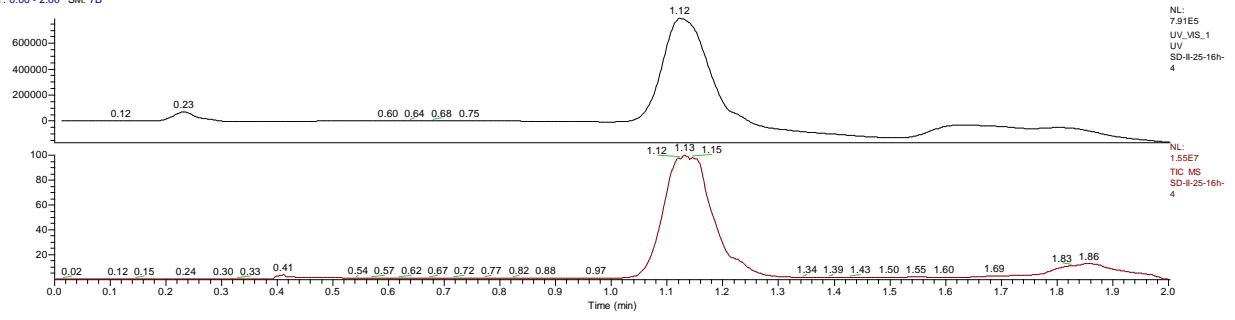

SD-#25-16h-4 #374-437 RT: 1.06-1.22 AV: 64 NL: 1.26E6  
T: ITMS - c ESI Full ms [500.00-2000.00]

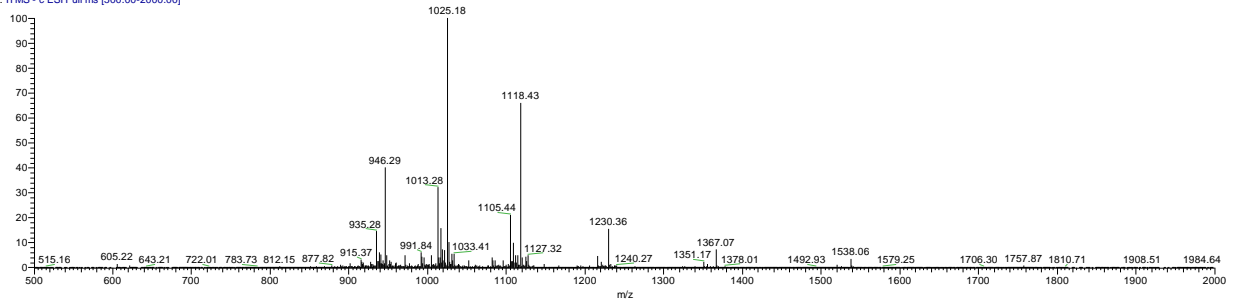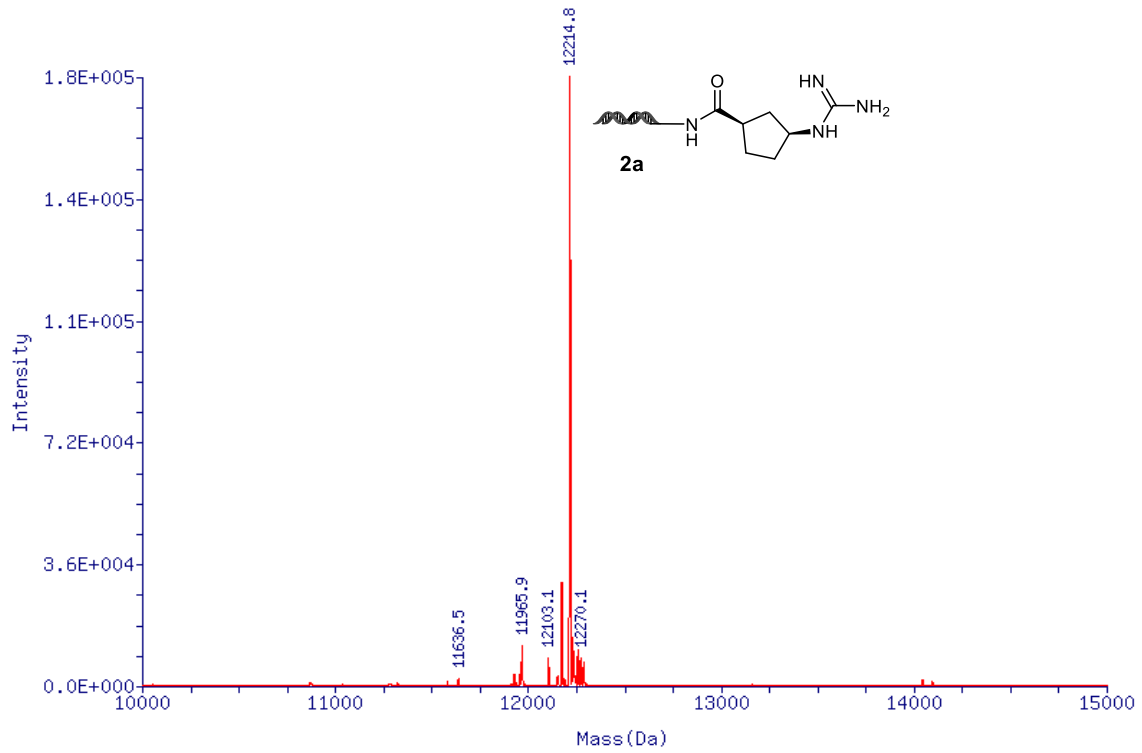



RT: 0.00 - 2.00 SM: 7B

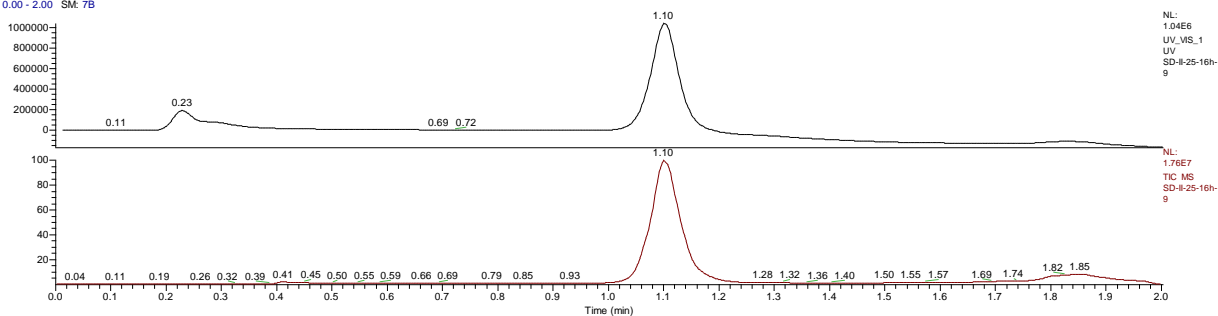

SD-#25-16h-9 #366-424 RT: 1.03-1.19 AV: 59 NL: 1.36E6  
T: ITMS - c ESI Full ms [500.00-2000.00]

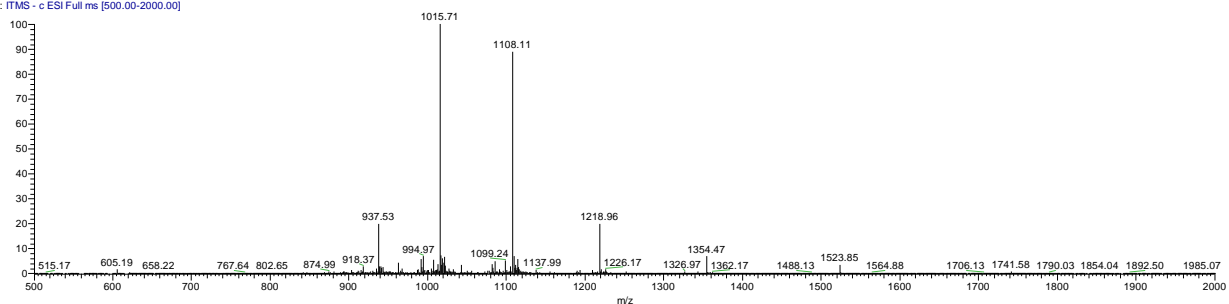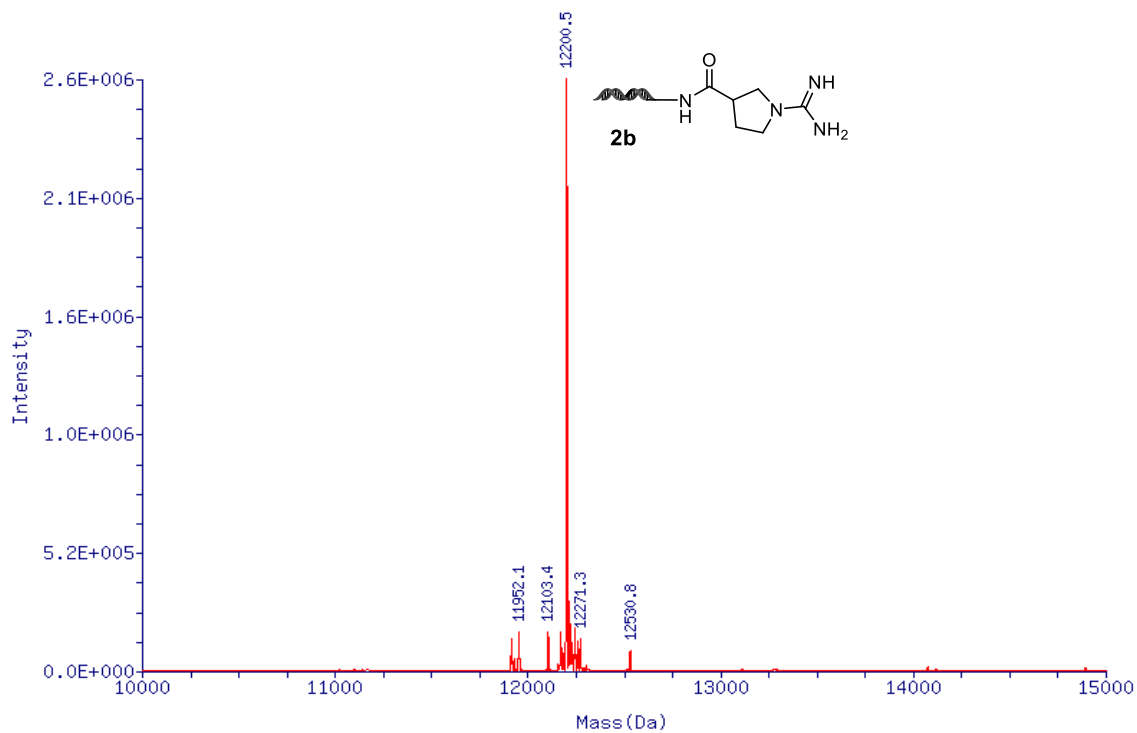

RT: 0.00 - 2.00 SM: 7B

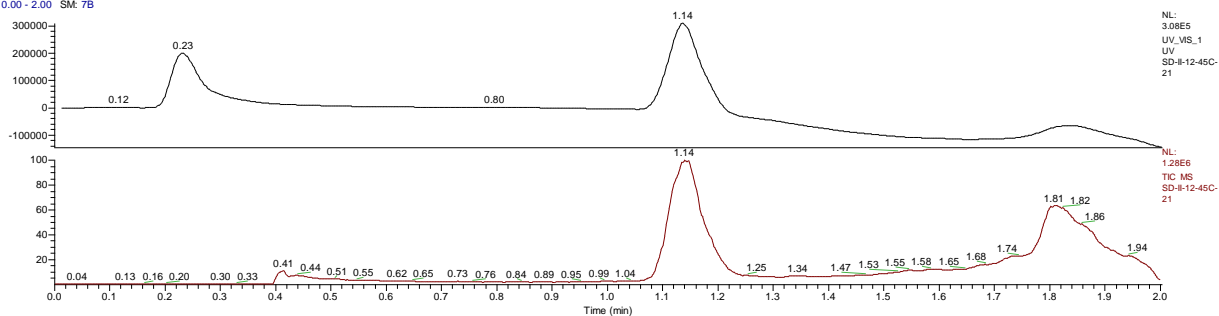

SD-II-12-45C-21 #381-440 RT: 1.07-1.24 AV: 60 NL: 1.17E5  
T: ITMS - c ESI Full ms [500.00-2000.00]

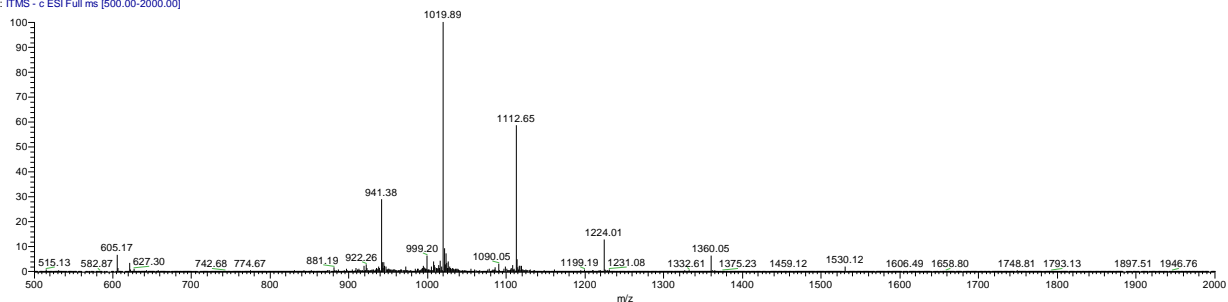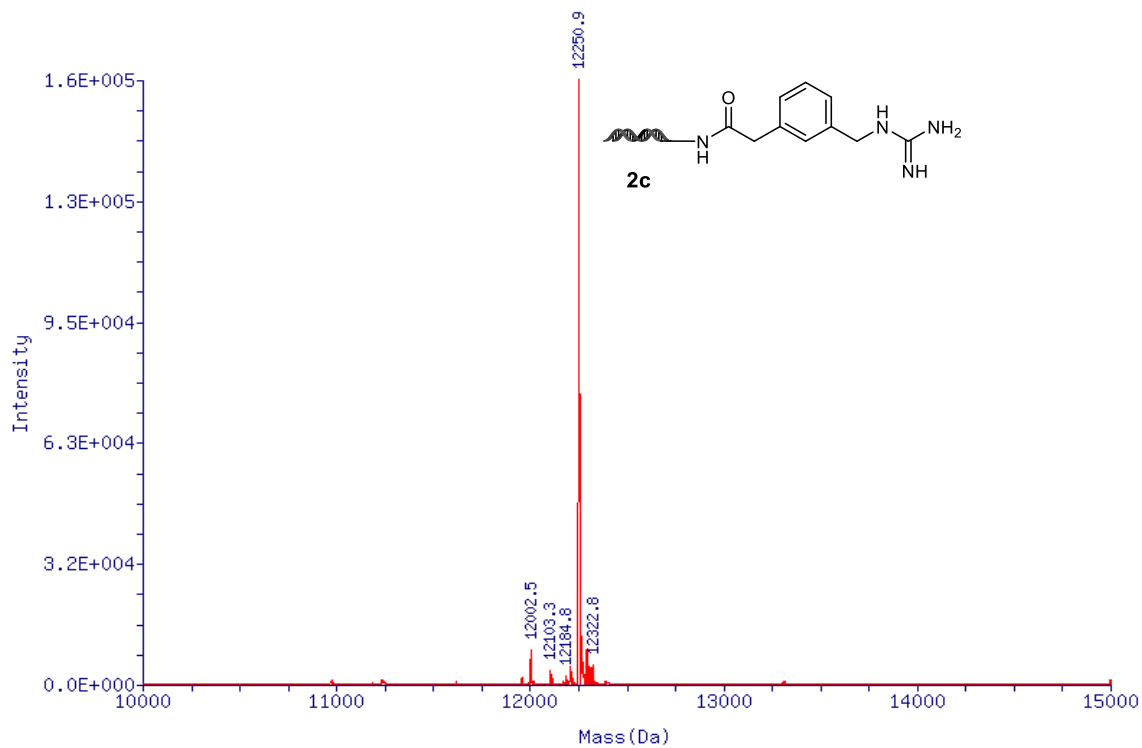

RT: 0.00 - 2.00 SM: 7B

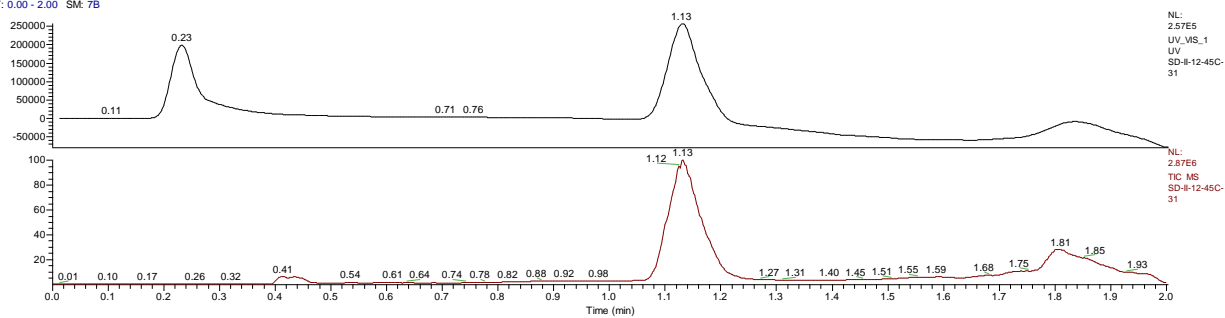

SD-II-12-45C-31 #376-436 RT: 1.06-1.23 AV: 61 NL: 2.44E5  
T: ITMS - c ESI Full ms [500.00-2000.00]

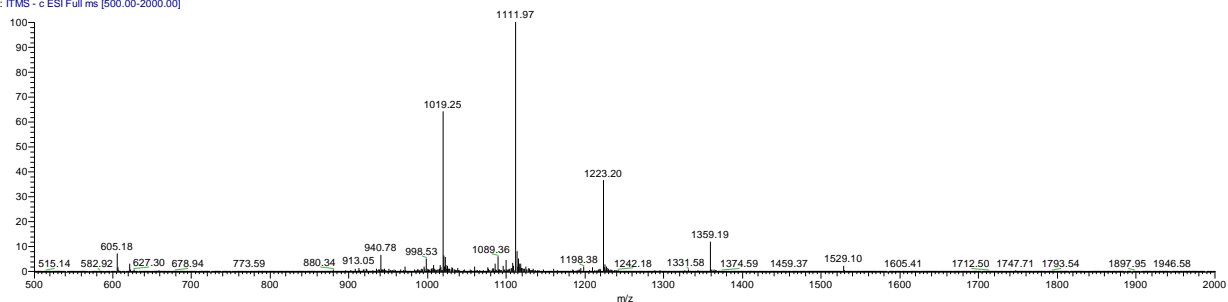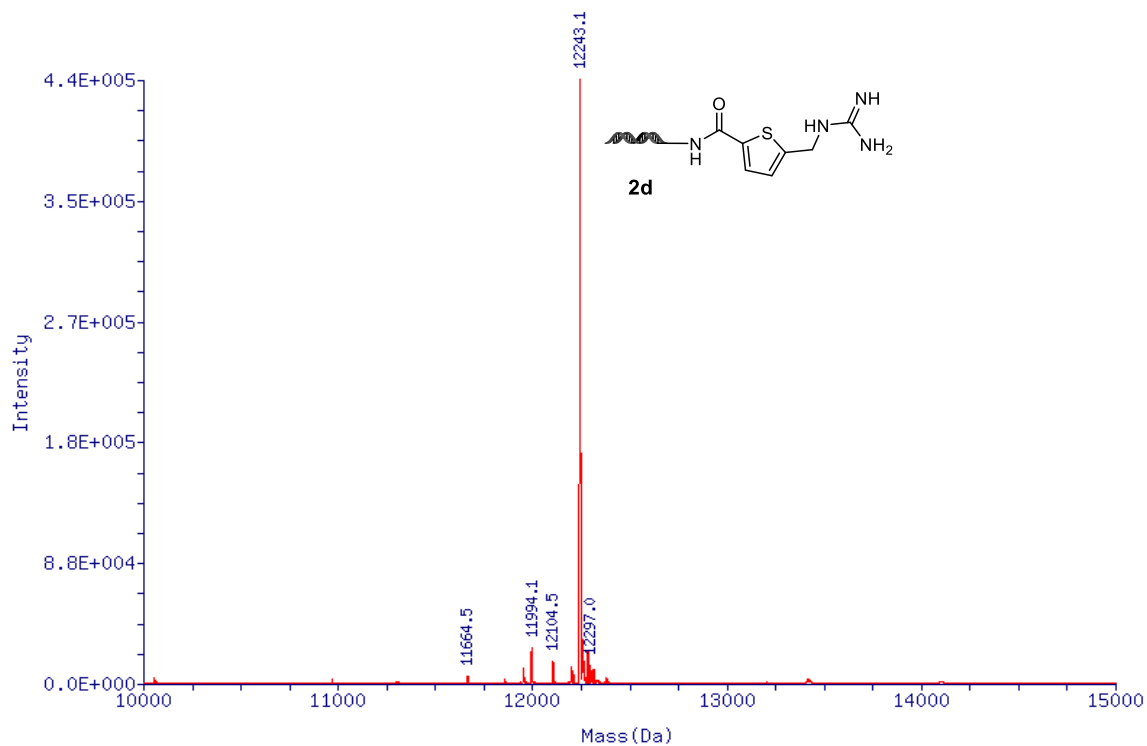

C:\Analytical\...SD-II-12-45C

RT: 0.00 - 2.00 SM: 7B

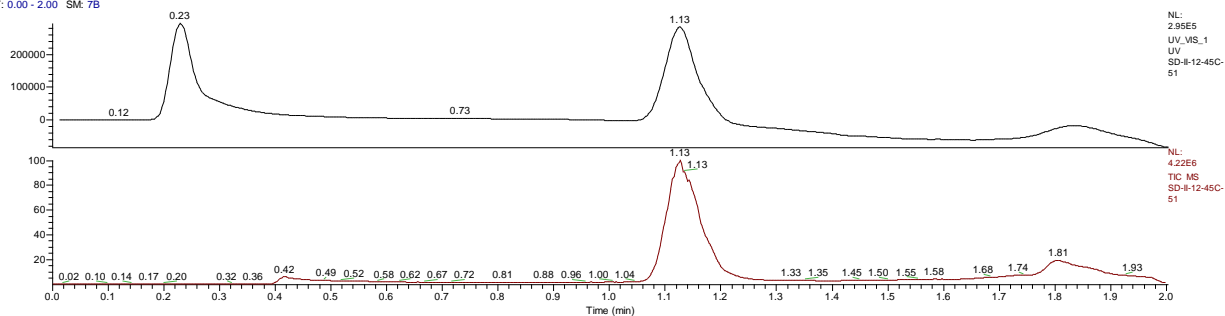

SD-II-12-45C-S1 #377-443 RT: 1.06-1.25 AV: 67 NL: 1.50E5  
T: ITMS - c ESI Full ms [500.00-2000.00]

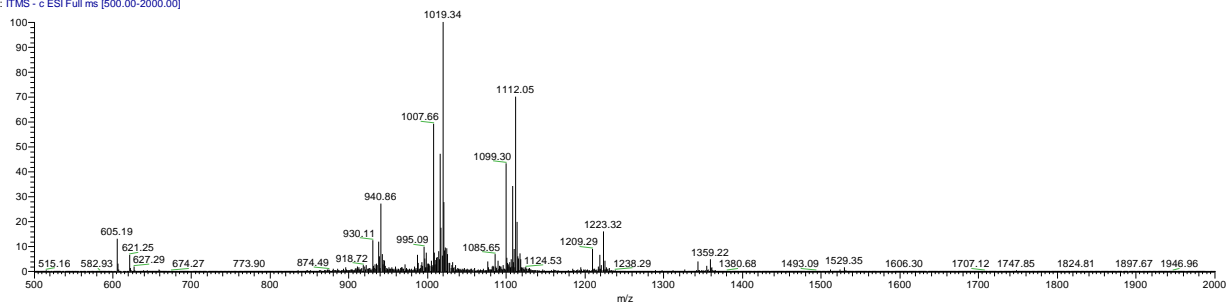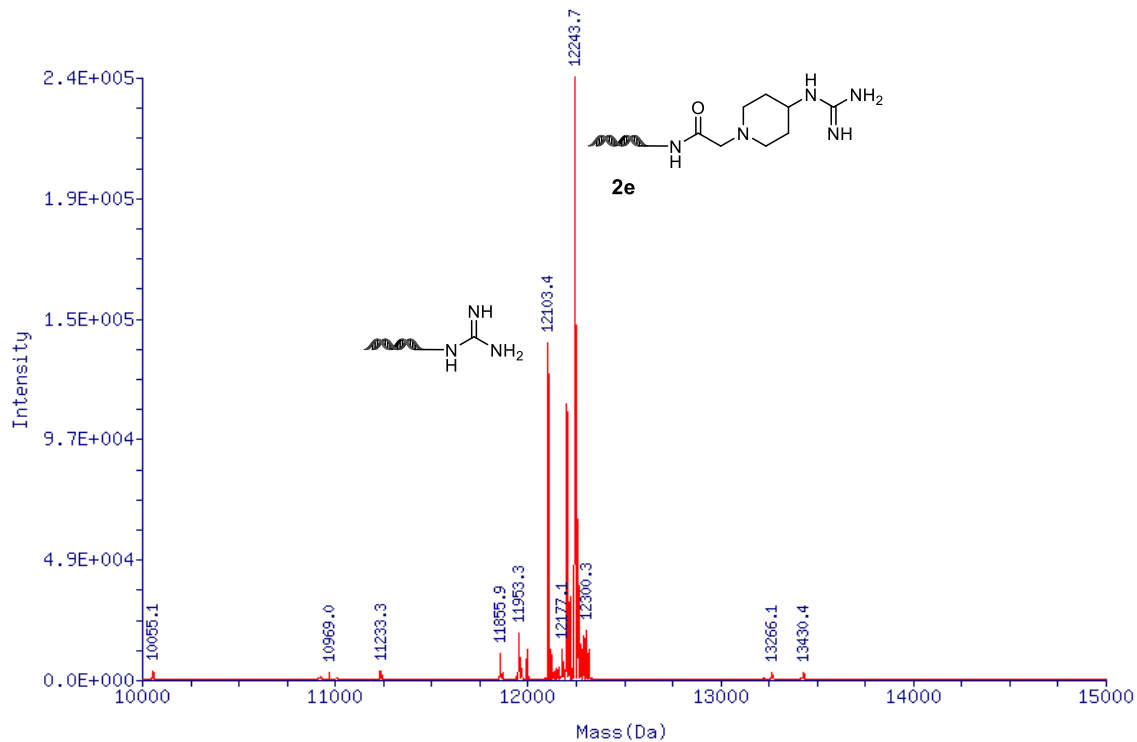

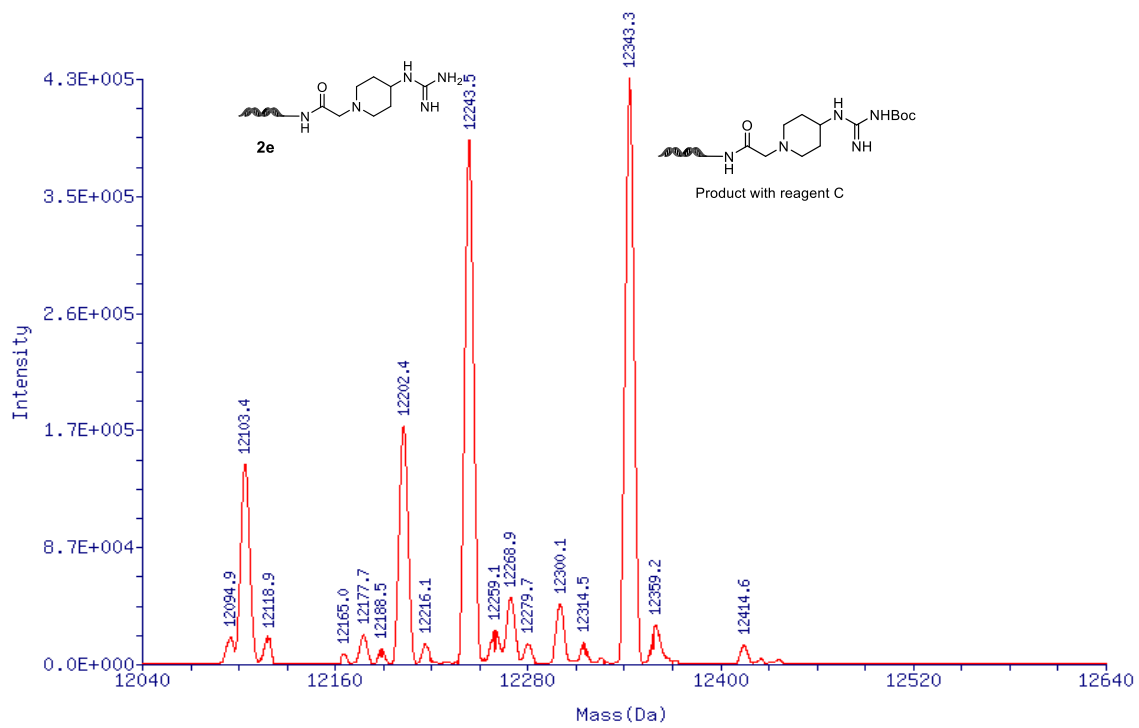

RT: 0.00 - 2.00 SM: 7B

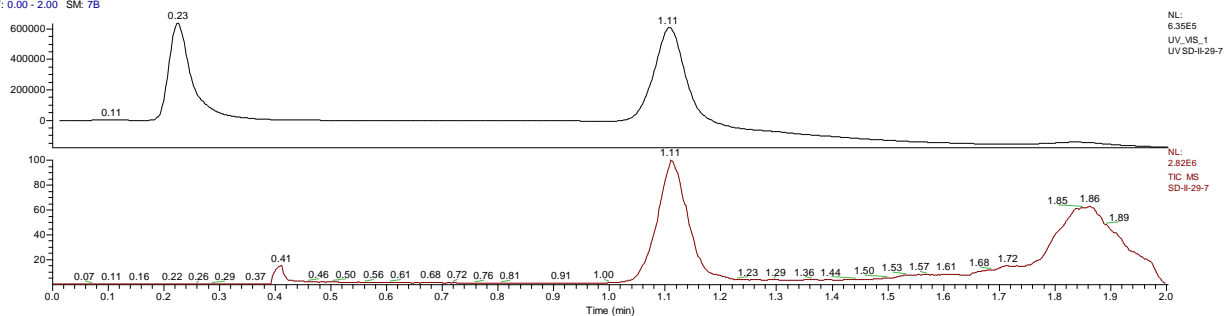

SD-II-29-7 #368-422 RT: 1.04-1.19 AV: 55 NL: 1.03E5  
T: FTMS - c ESI Full ms [500.00-2000.00]

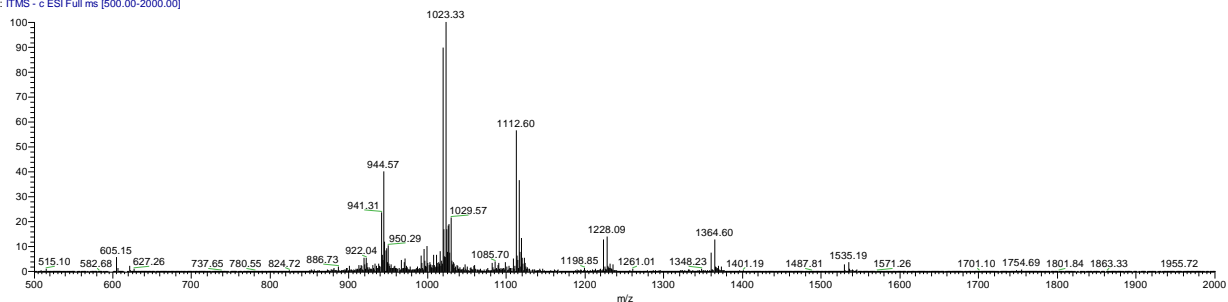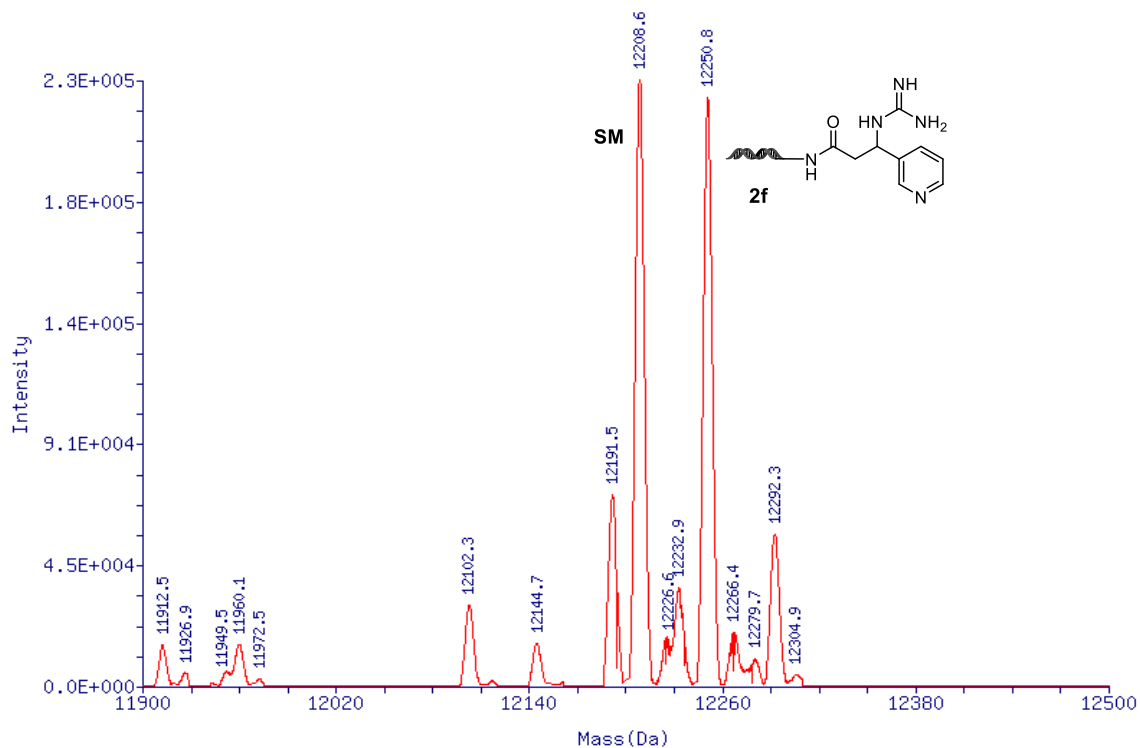

RT: 0.00 - 2.00 SM: 7B

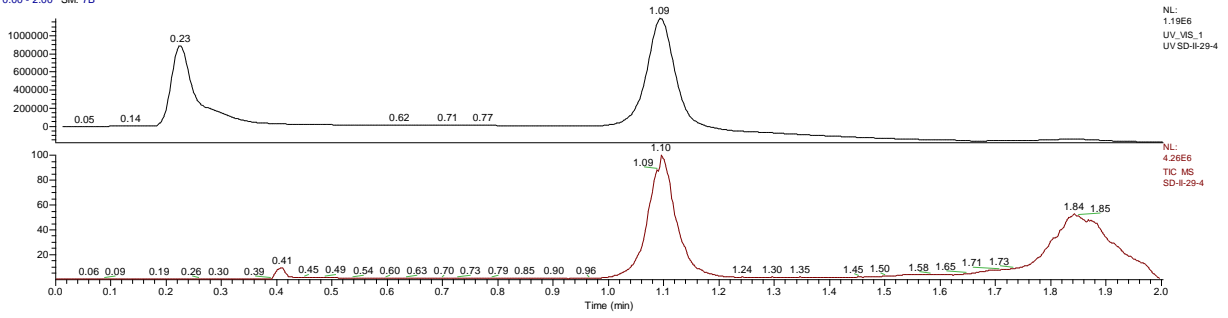

SD-II-29-4 #364-416 RT: 1.03-1.17 AV: 53 NL: 1.82E5  
T: ITMS - c ESI Full ms [500.00-2000.00]

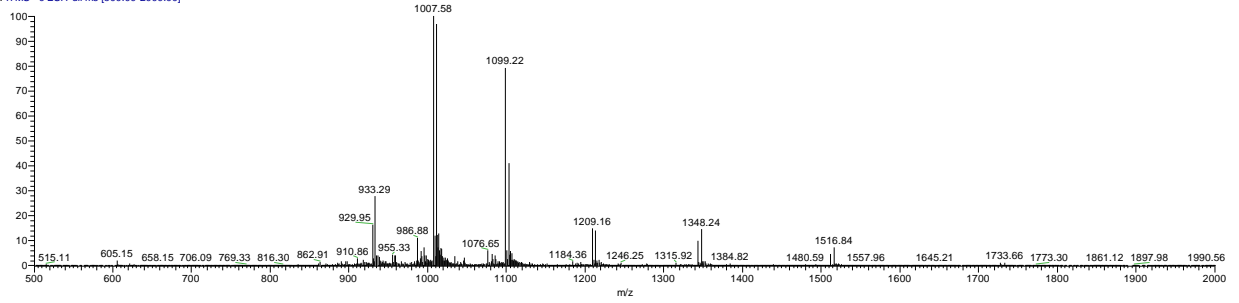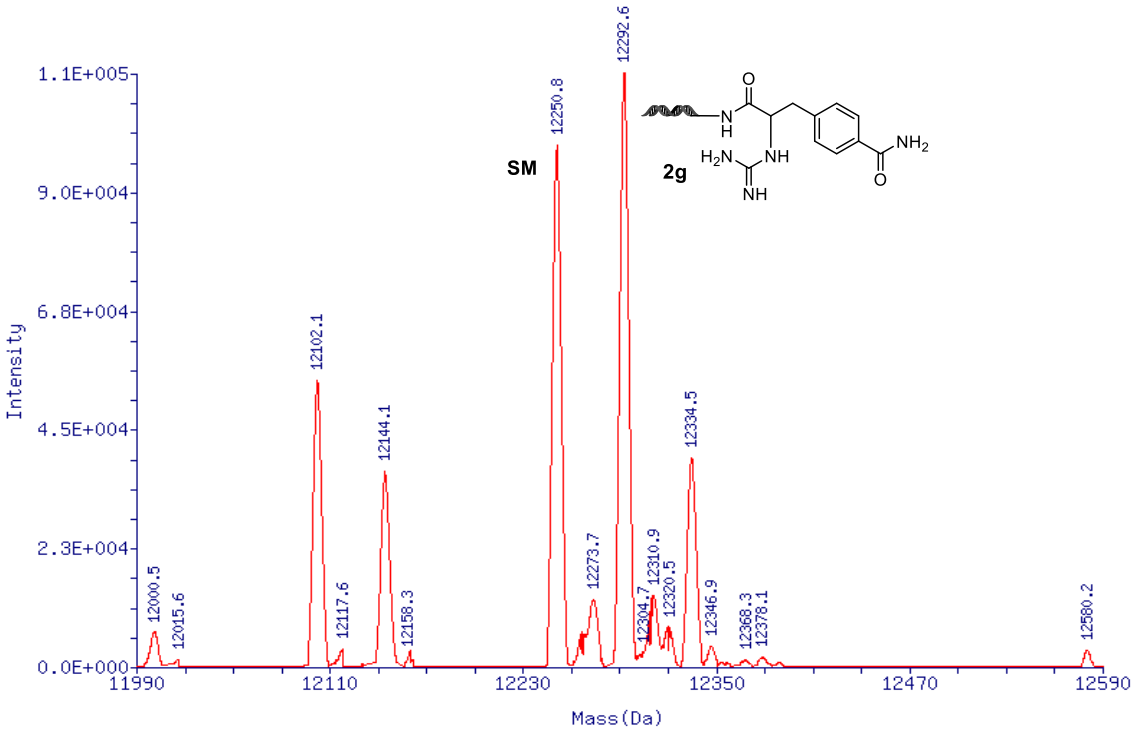

RT: 0.00 - 2.00 SM: 7B

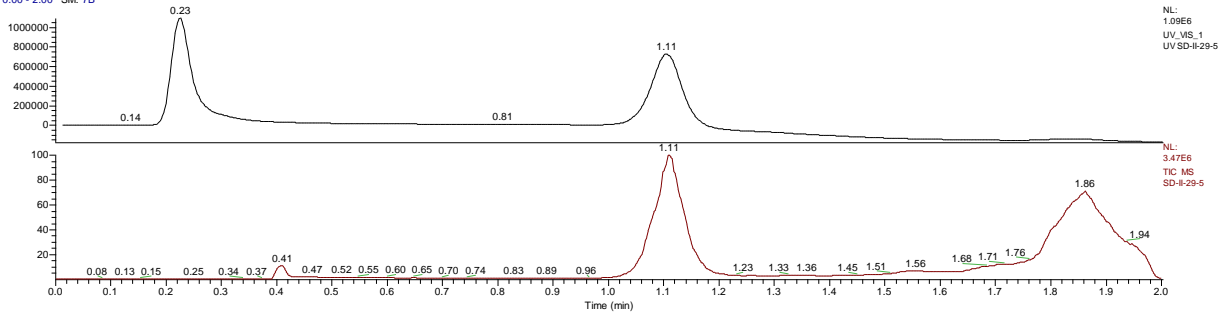

SD-II-29-5 #364-427 RT: 1.03-1.20 AV: 64 NL: 5.67E4  
T: ITMS - c ESI Full ms [500.00-2000.00]

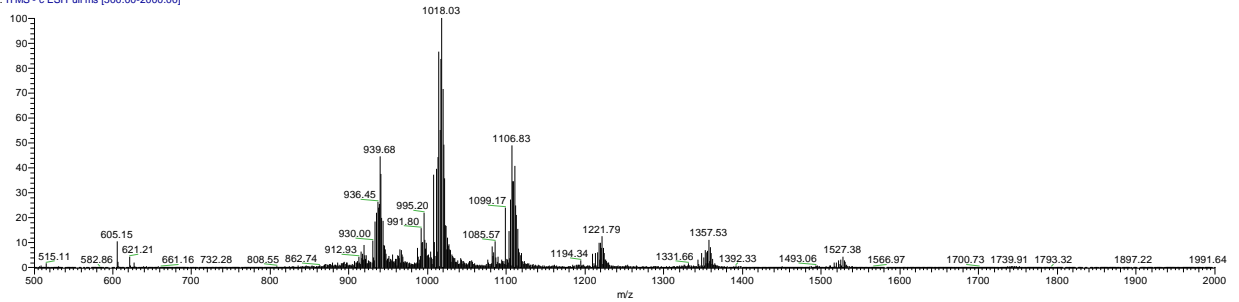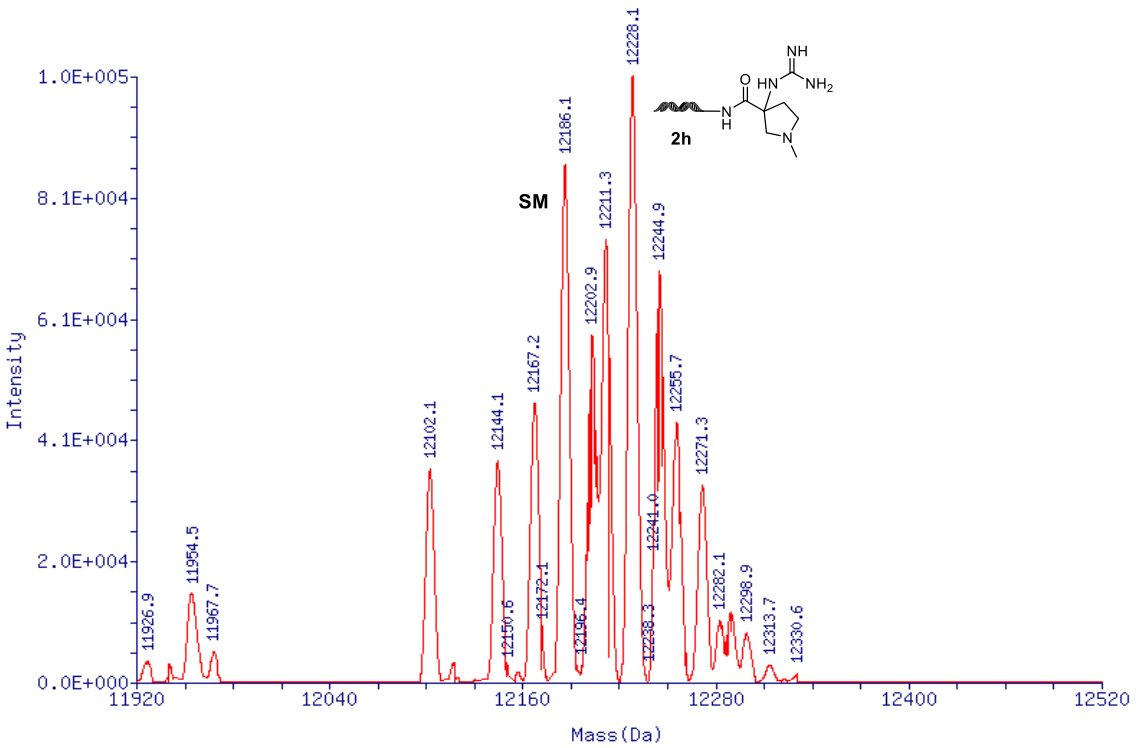



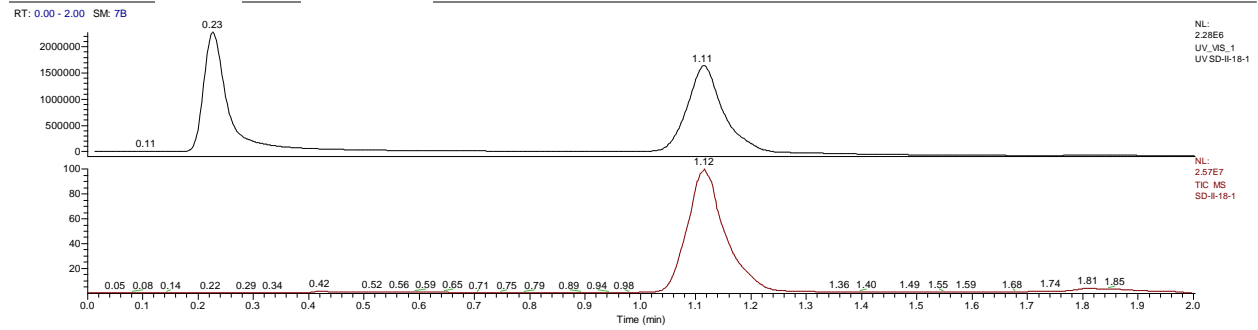

SD-I-18-1 #371-432 RT: 1.05-1.21 AV: 62 NL: 1.09E6  
T: FTMS - c ESI Full ms [500.00-2000.00]

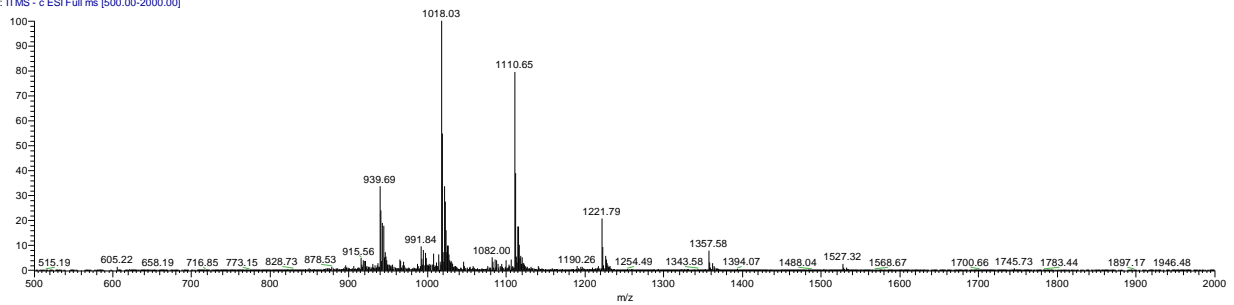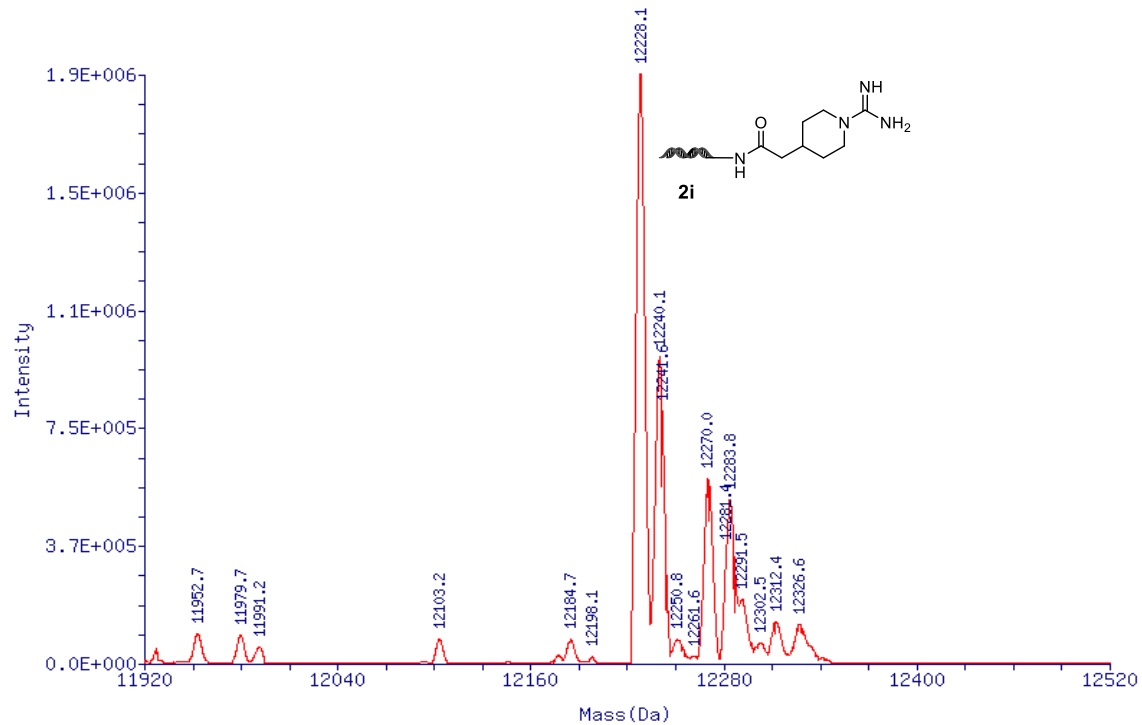

RT: 0.00 - 2.00 SM: 7B

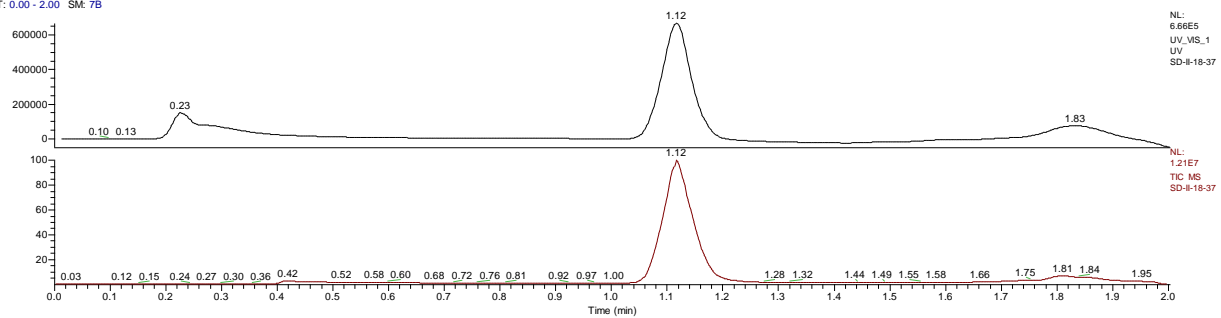

SD-II-18-37 #376-428 RT: 1.06-1.20 AV: 53 NL: 1.21E6  
T: ITMS - c ESI Full ms [500.00-2000.00]

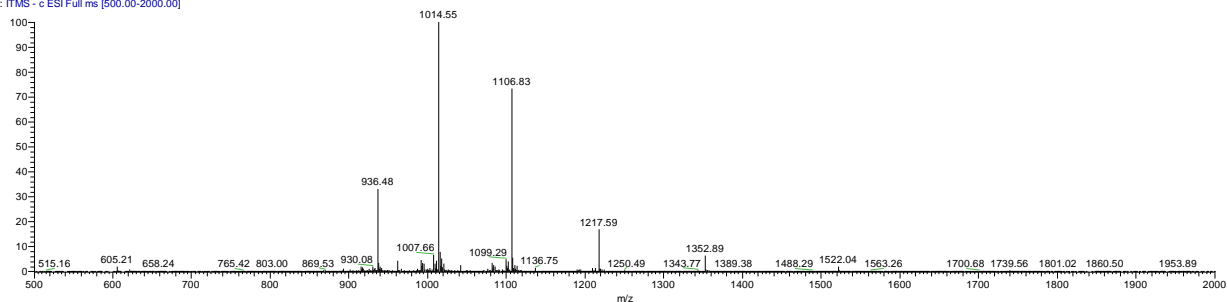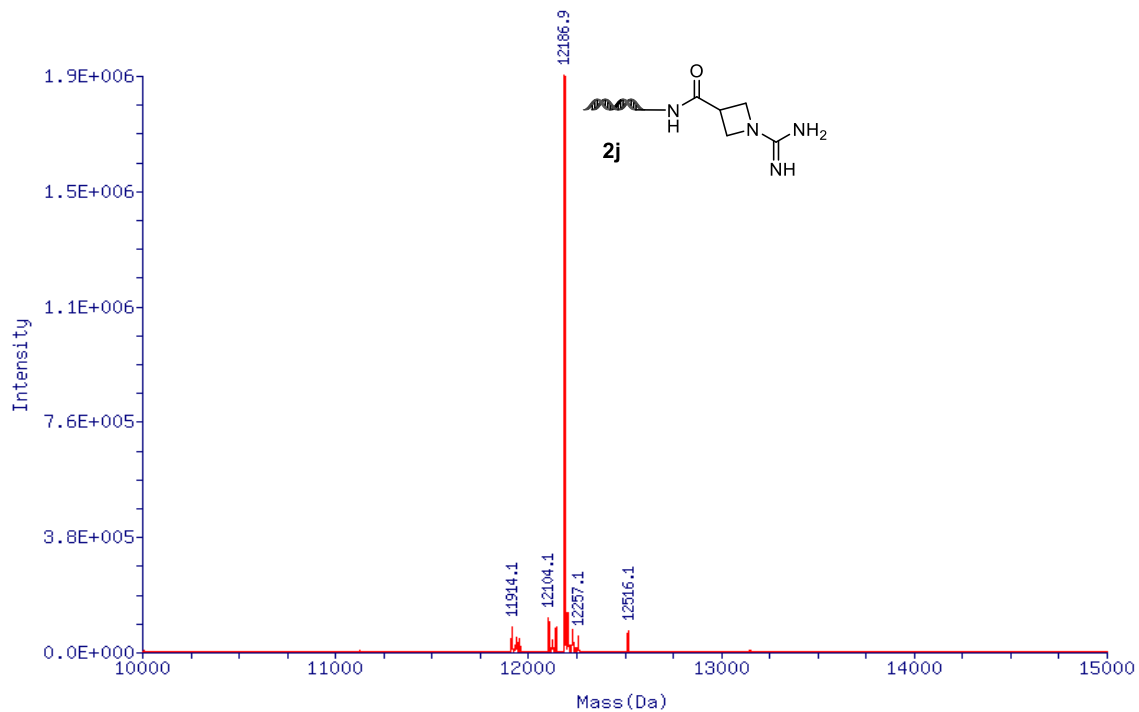

RT: 0.00 - 2.00 SM: 7B

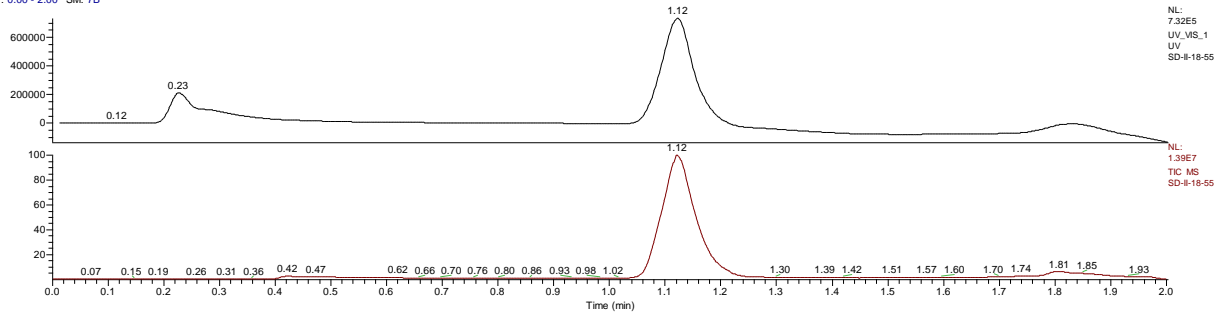

SD-I-18-55 #376-425 RT: 1.06-1.19 AV: 50 NL: 1.02E6  
T: FTMS - c ESI Full ms [500.00-2000.00]

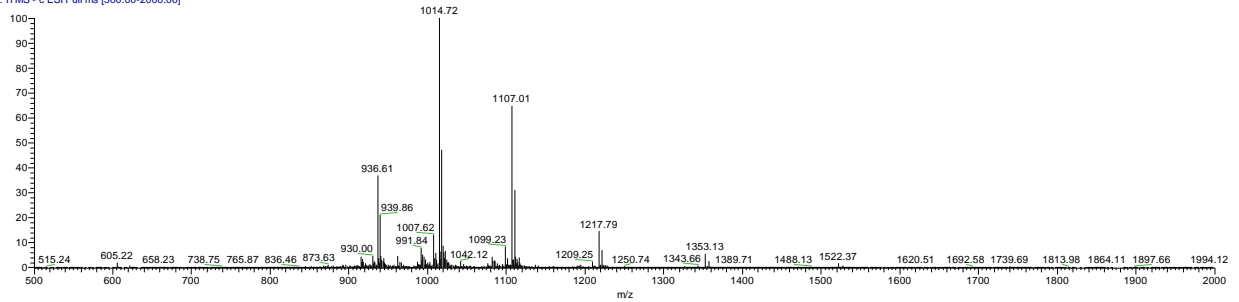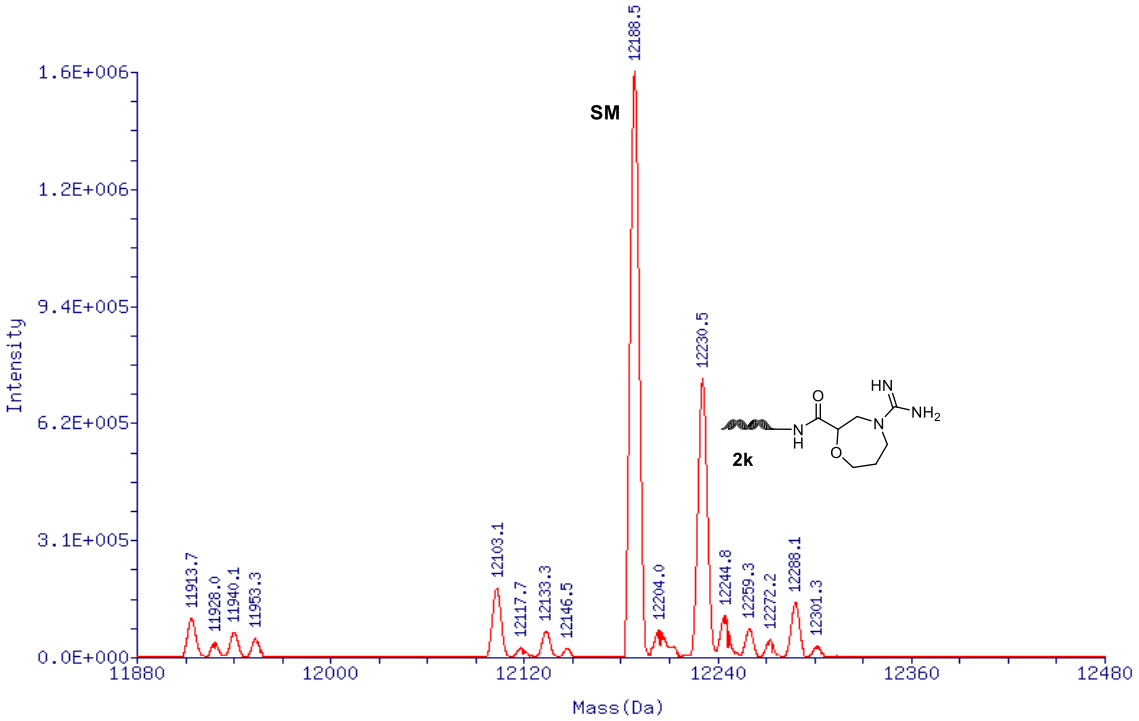

RT: 0.00 - 2.00 SM: 7B

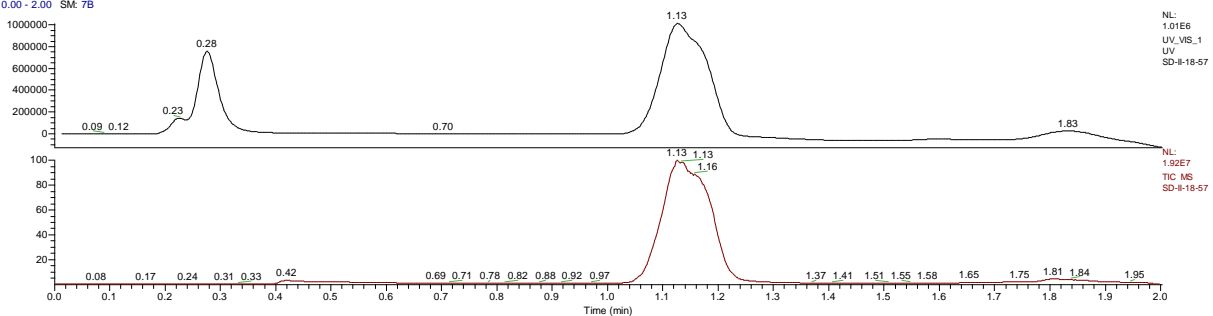

SD-I-18-57 #374-438 RT: 1.06-1.22 AV: 65 NL: 7.81E5  
T: ITMS - c ESI Full ms [500.00-2000.00]

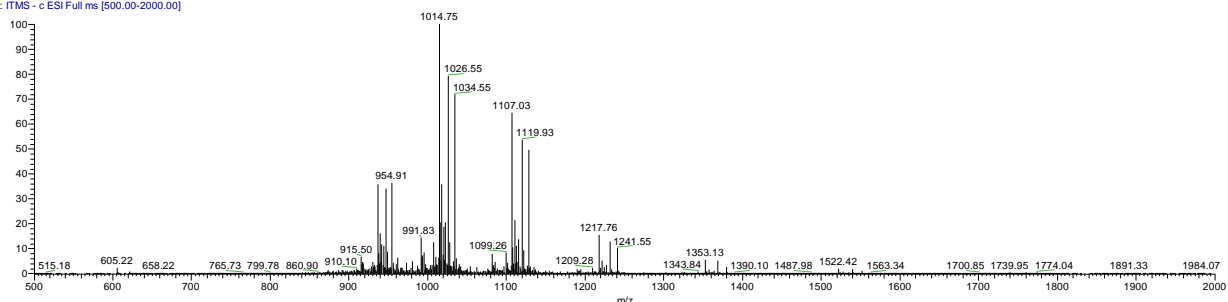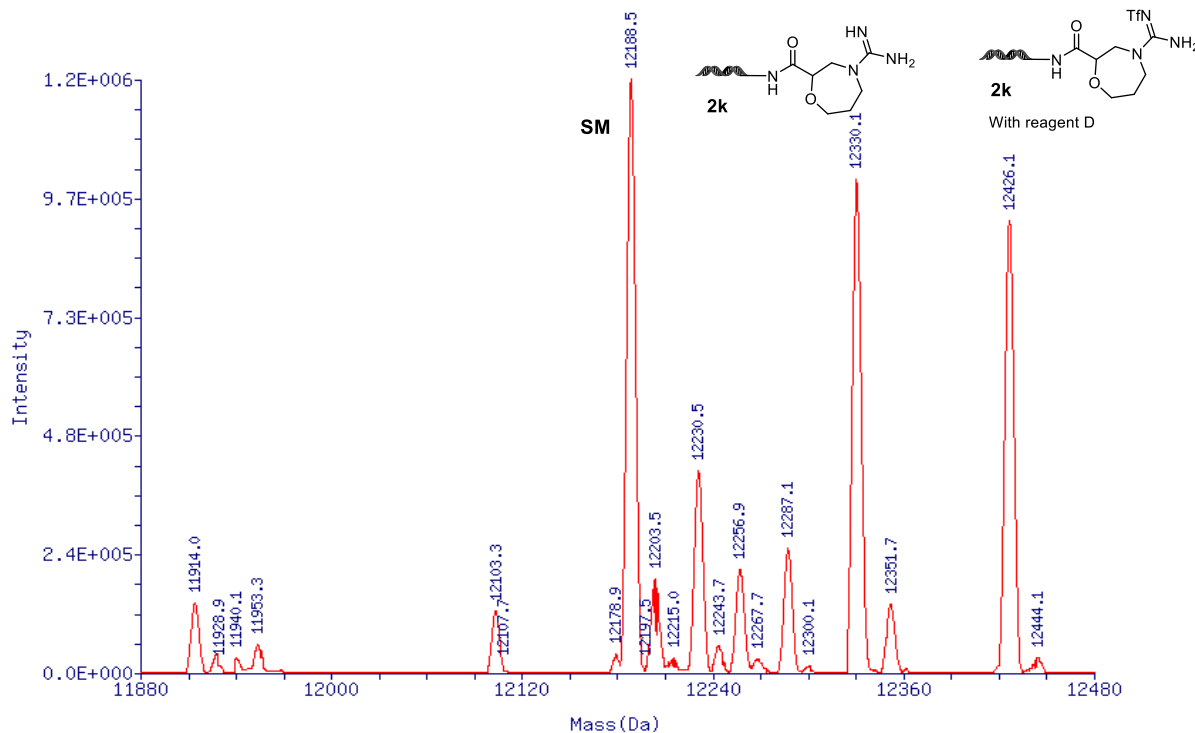

RT: 0.00 - 2.00 SM: 7B

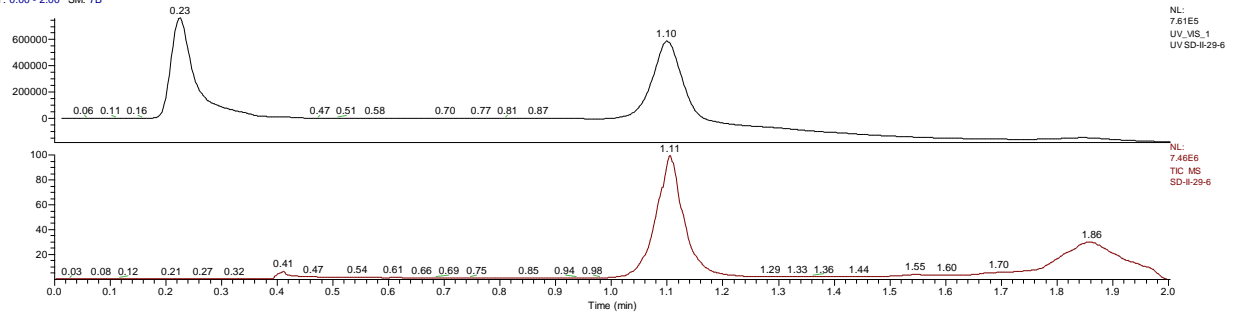

SD-II-29-6 #363-424 RT: 1.02-1.19 AV: 62 NL: 2.70E5  
T: FTMS - c ESI Full ms [500.00-2000.00]

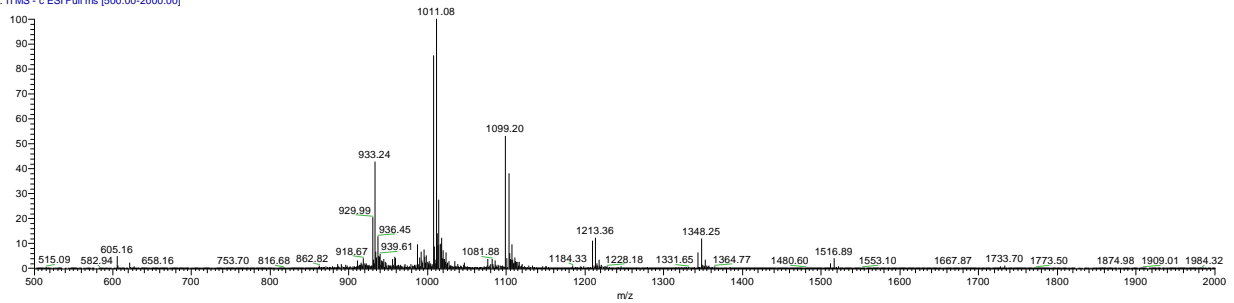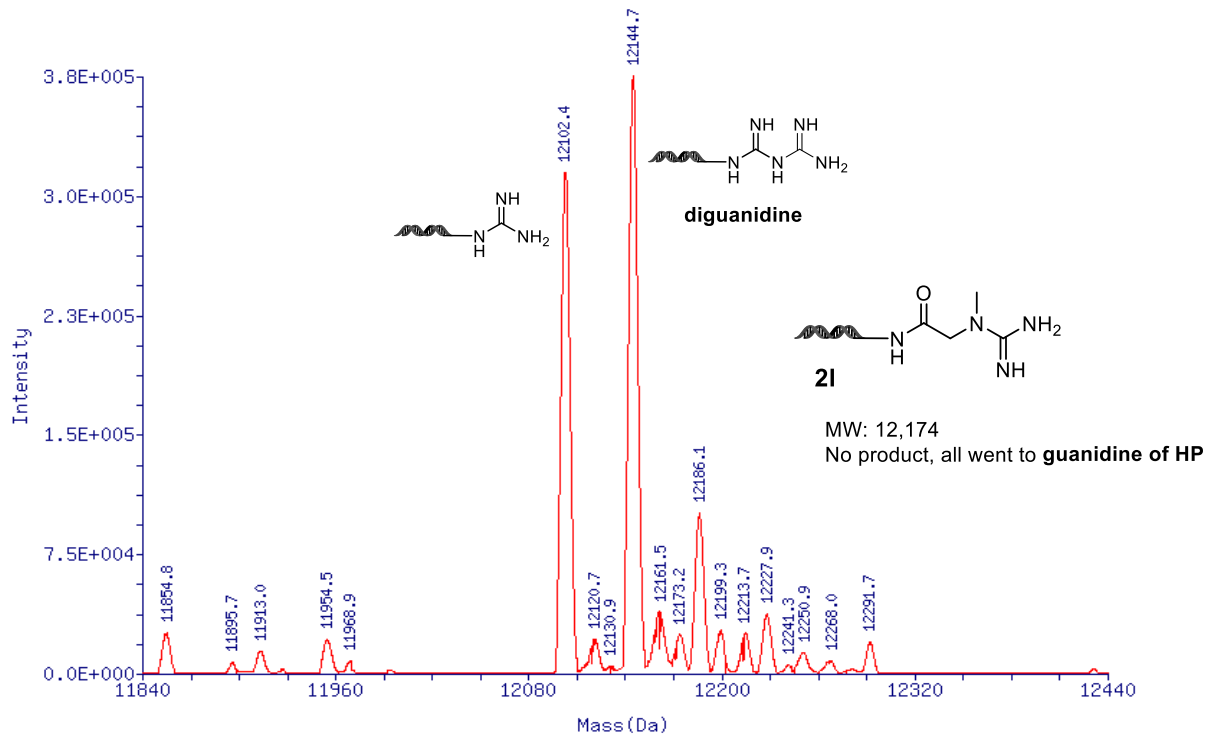

RT: 0.00 - 2.00 SM: 7B

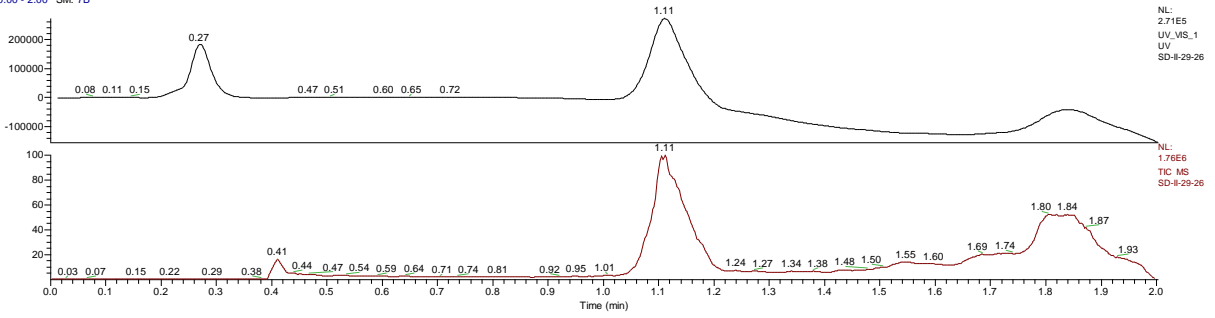

SD-II-29-26 #370-434 RT: 1.04-1.22 AV: 65 NL: 5.88E4  
T: ITMS - c ESI Full ms [500.00-2000.00]

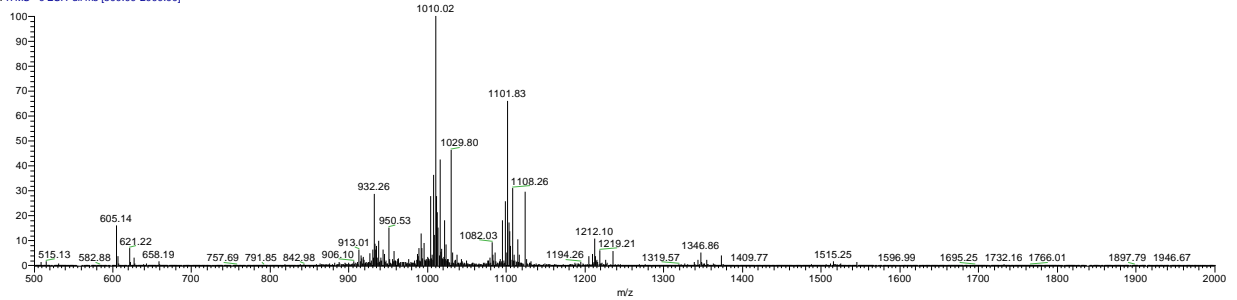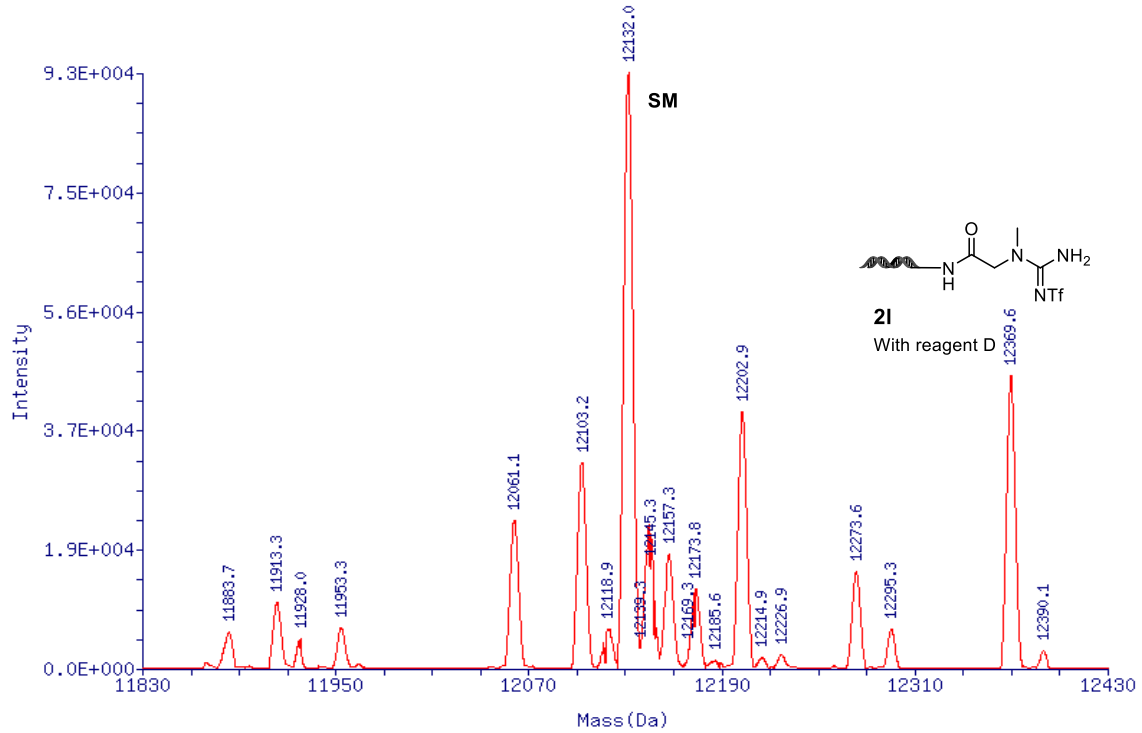

RT: 0.00 - 2.00 SM: 7B

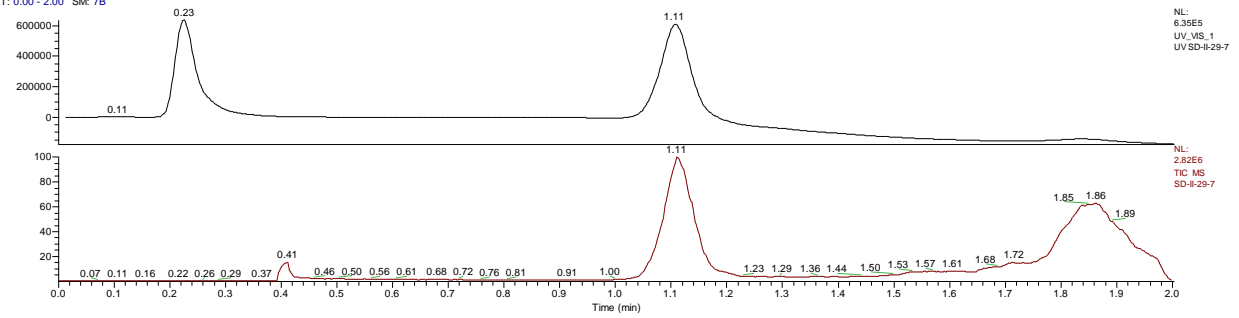

SD-II-29-7 #368-423 RT: 1.04-1.19 AV: 56 NL: 1.01E5  
T: FTMS - c ESI Full ms [500.00-2000.00]

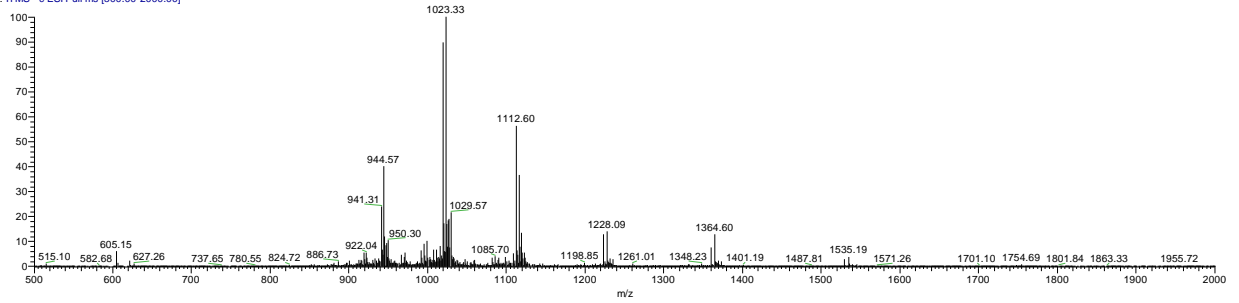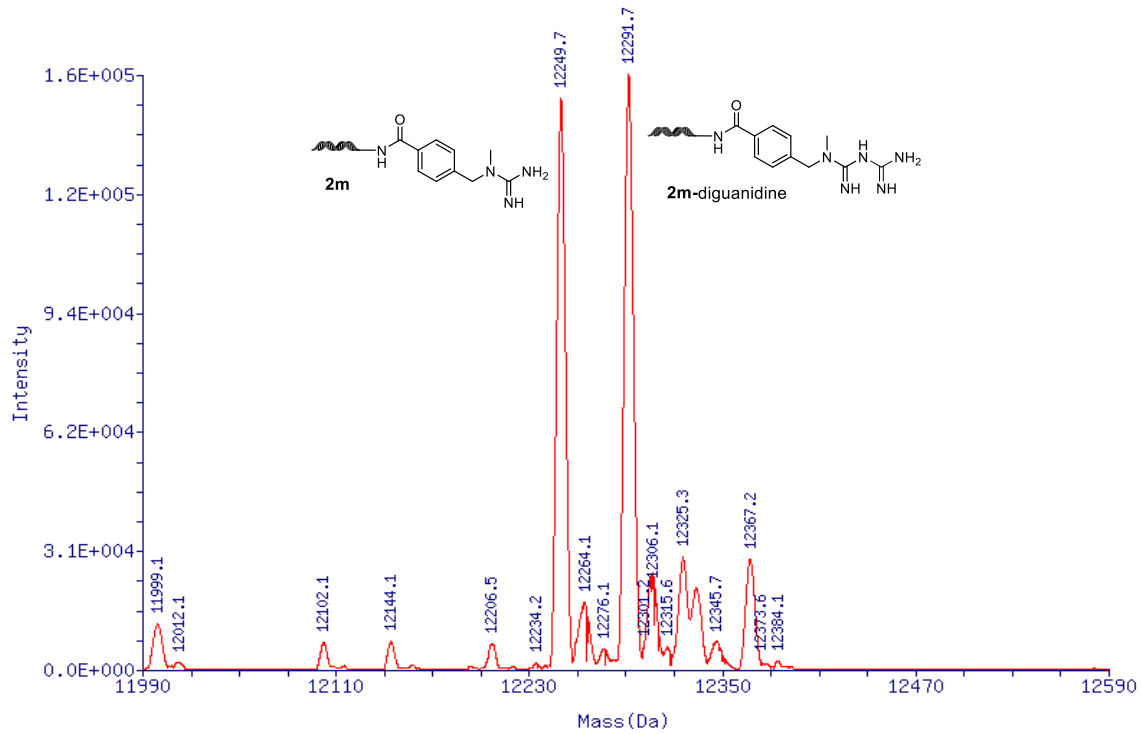

RT: 0.00 - 2.00 SM: 7B

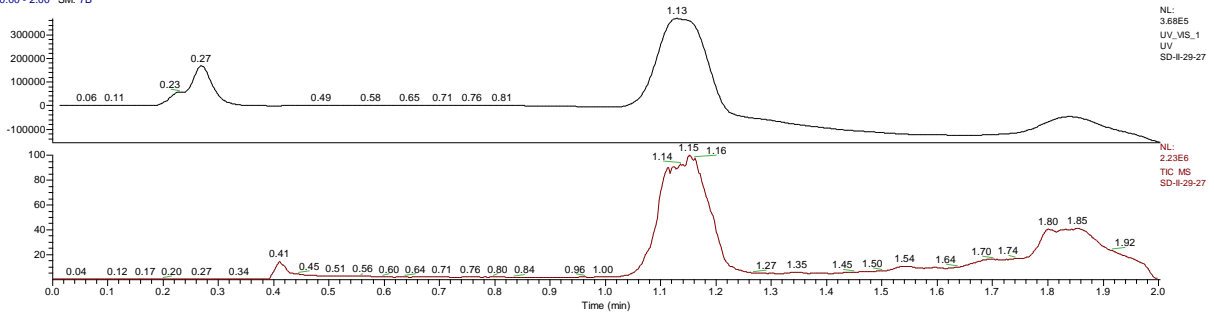

SD-II-29-27 #367-444 RT: 1.04-1.25 AV: 78 NL: 9.55E4  
T: FTMS - c ESI Full ms [500.00-2000.00]

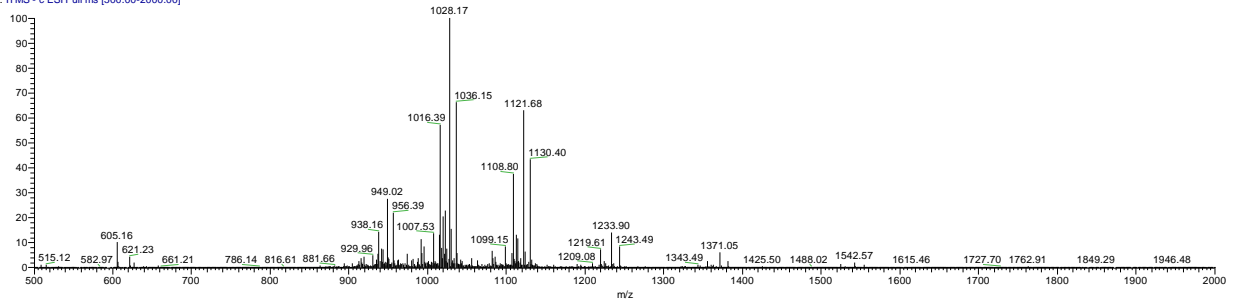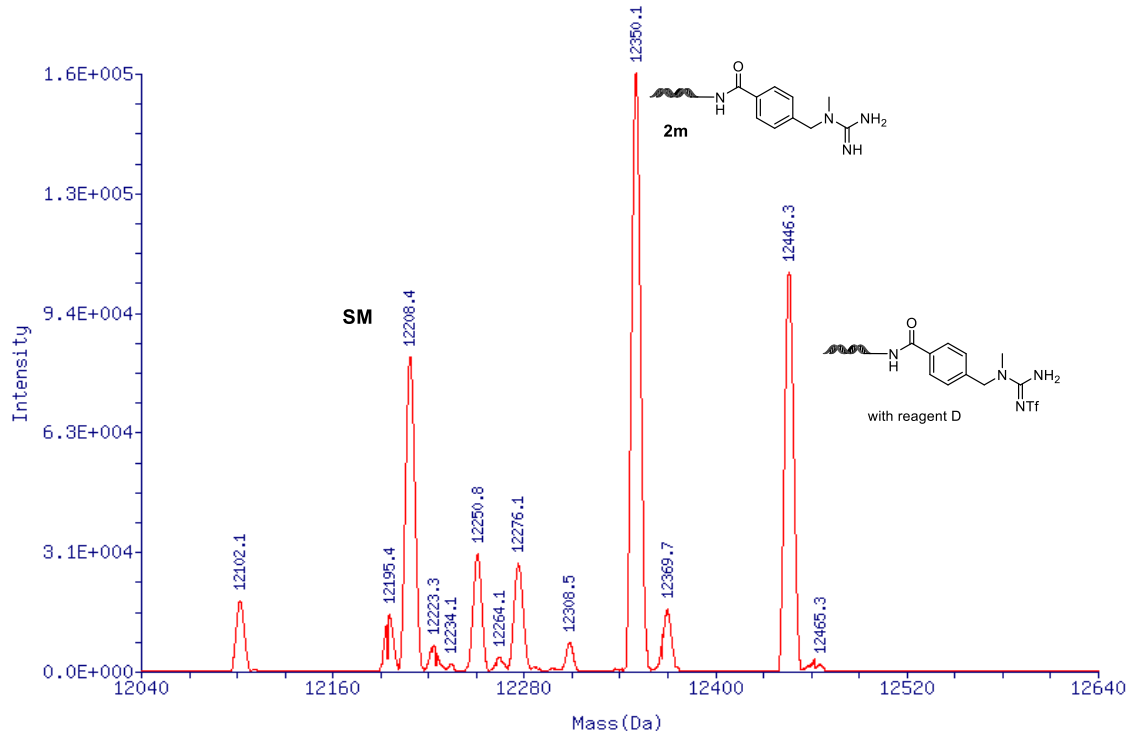



RT: 0.00 - 2.00 SM: 7B

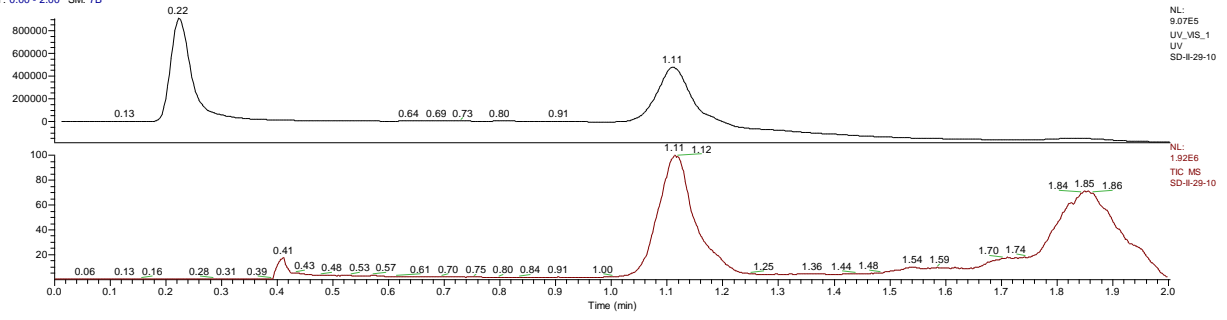

SD-II-29-10 #365-435 RT: 1.03-1.23 AV: 71 NL: 6.14E4  
T: FTMS - c ESI Full ms [500.00-2000.00]

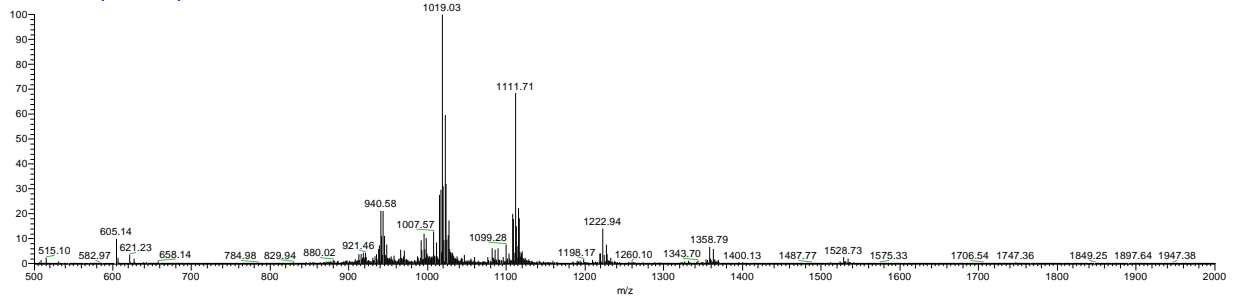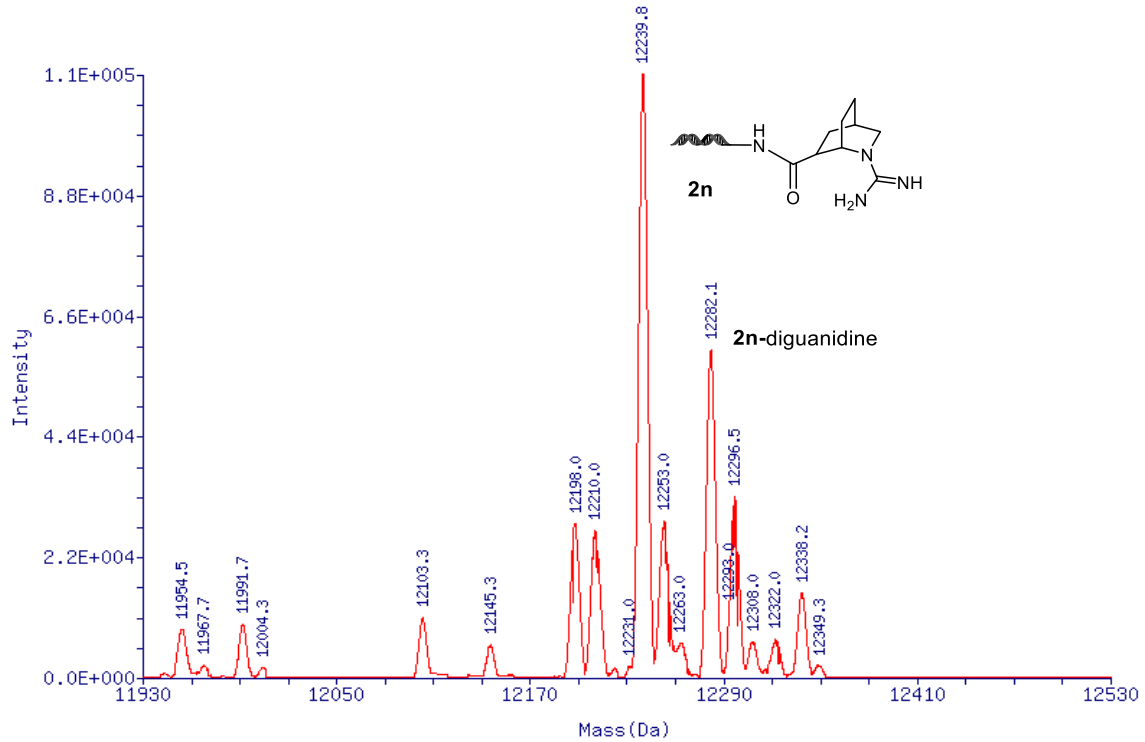

SD-II-35-4\_181211101312

3:52

RT: 0.00 - 2.00 SM: 7B

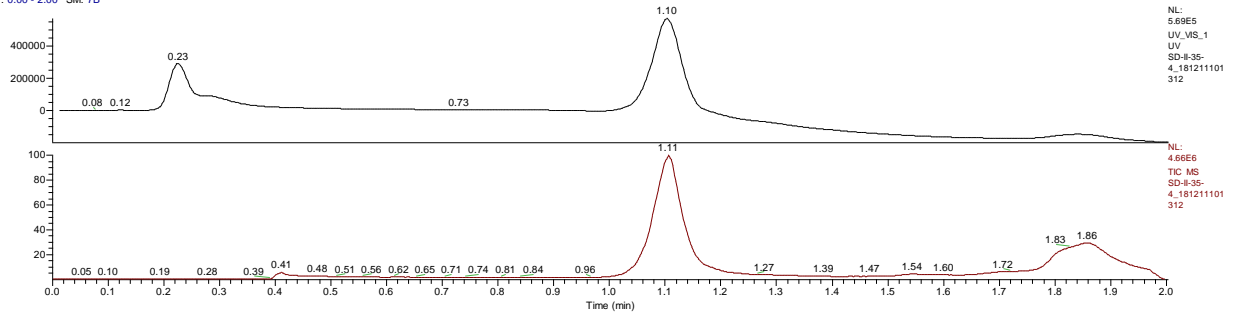

SD-II-35-4\_181211101312 #362-425 RT: 1.02-1.19 AV: 64 NL: 3.41E5  
T: FTMS - c ESI Full ms [500.00-2000.00]

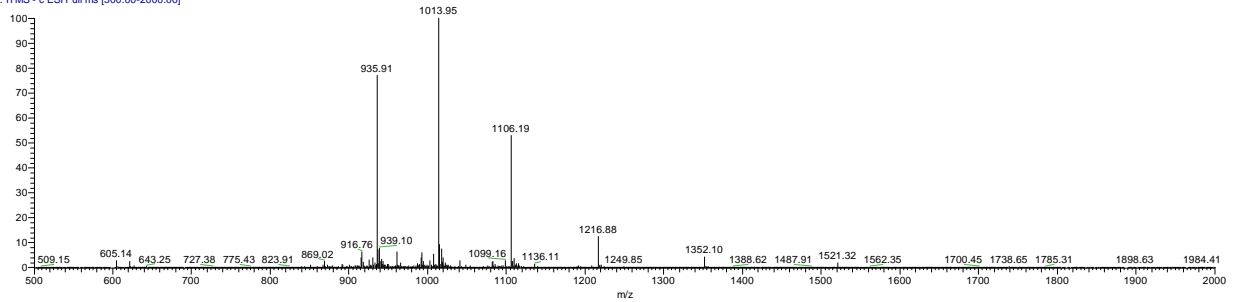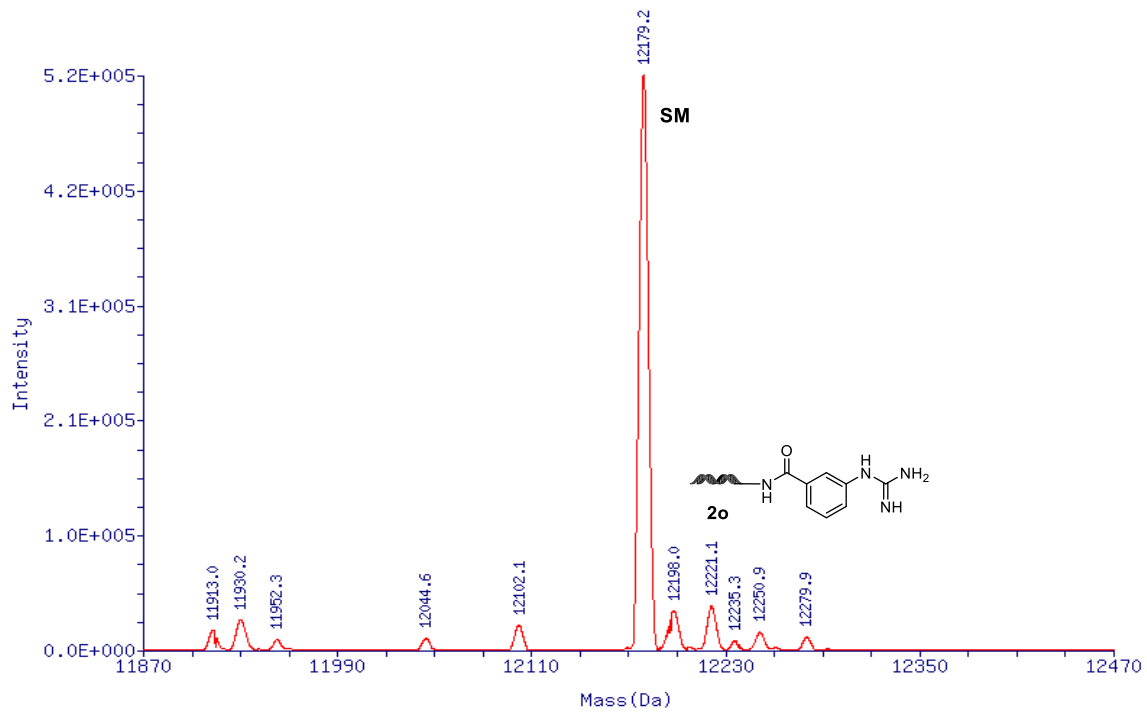

RT: 0.00 - 2.00 SM: 7B

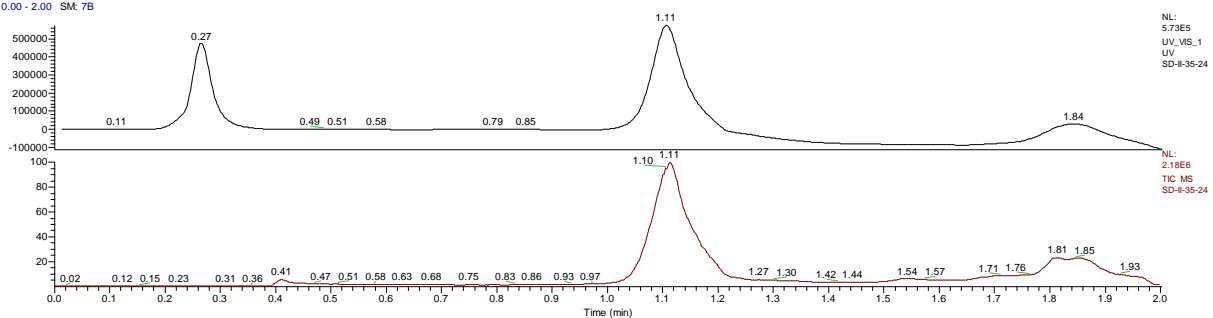

SD-II-35-24 #366-432 RT: 1.03-1.22 AV: 67 NL: 1.10E5  
T: ITMS - c ESI Full ms [500.00-2000.00]

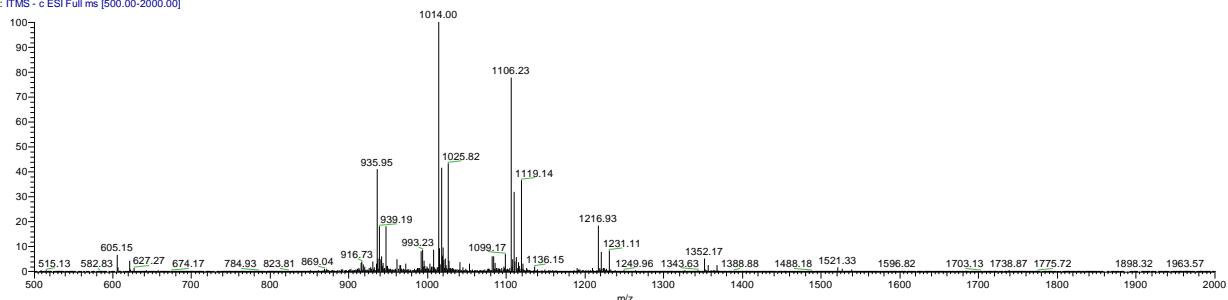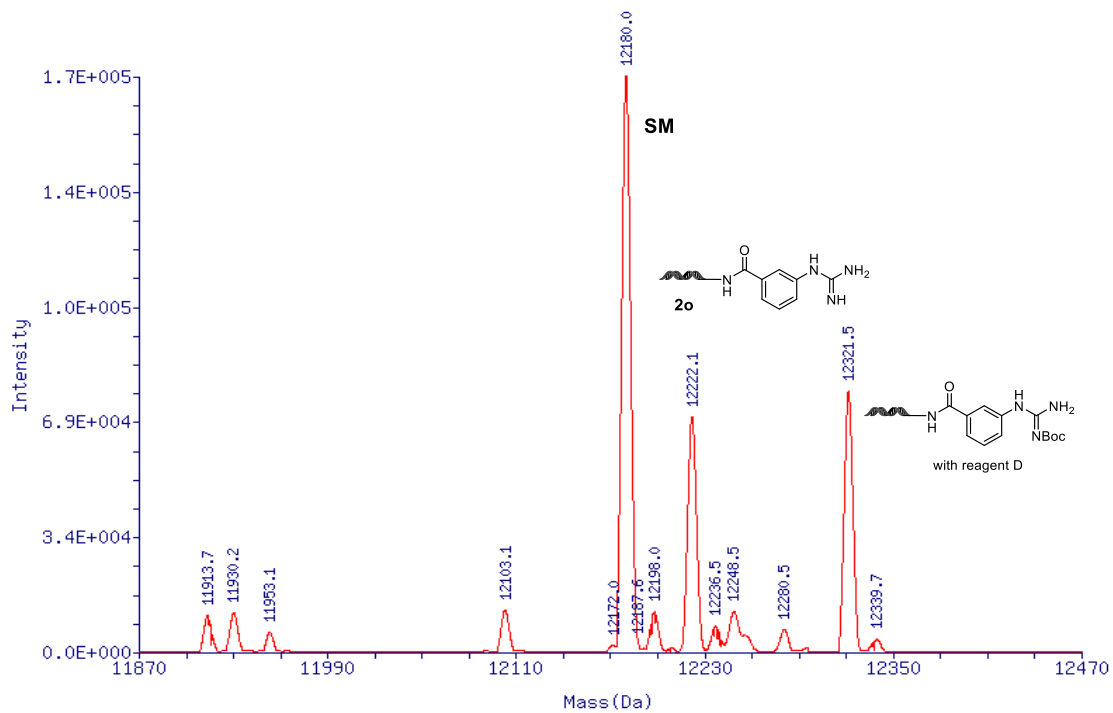

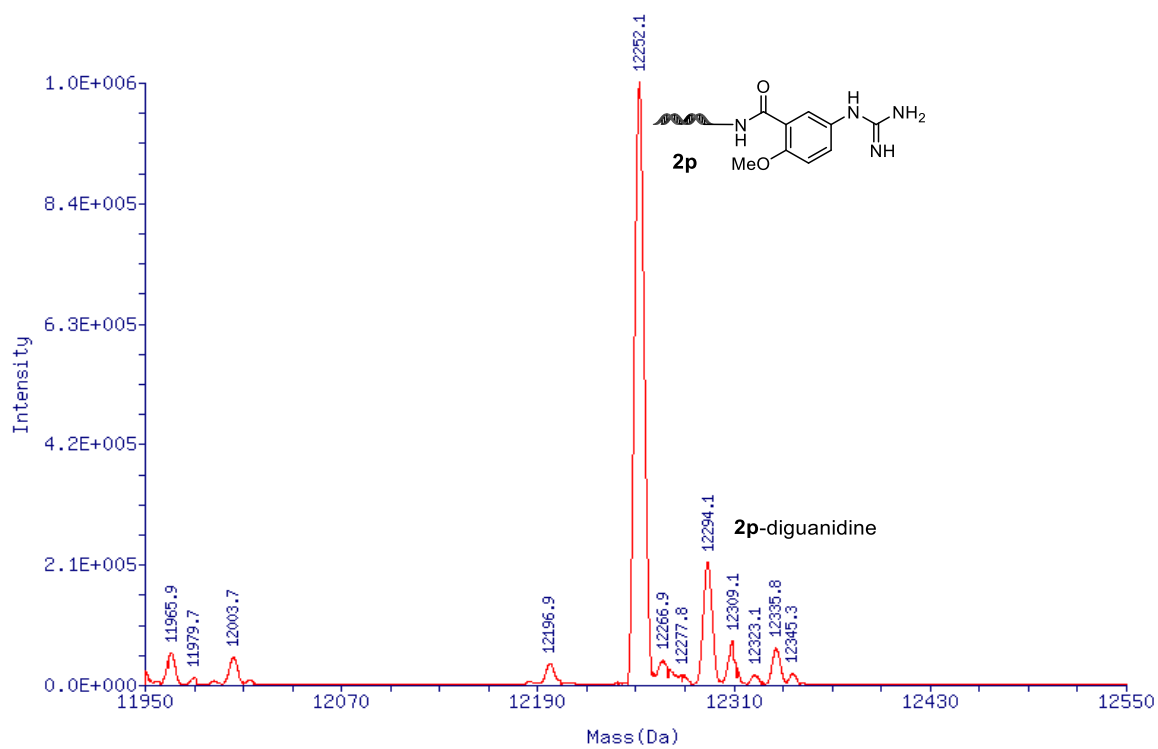

RT: 0.00 - 2.00 SM: 7B

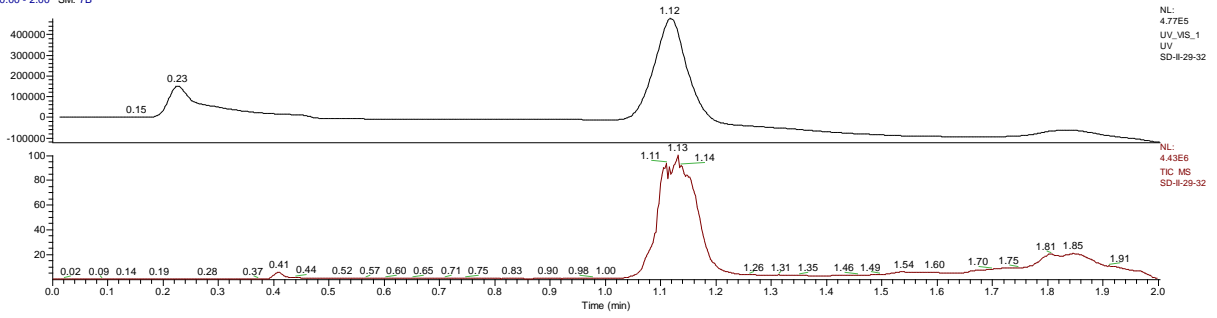

SD-II-29-32 #375-437 RT: 1.06-1.23 AV: 63 NL: 3.94E5  
T: ITMS - c ESI Full ms [500.00-2000.00]

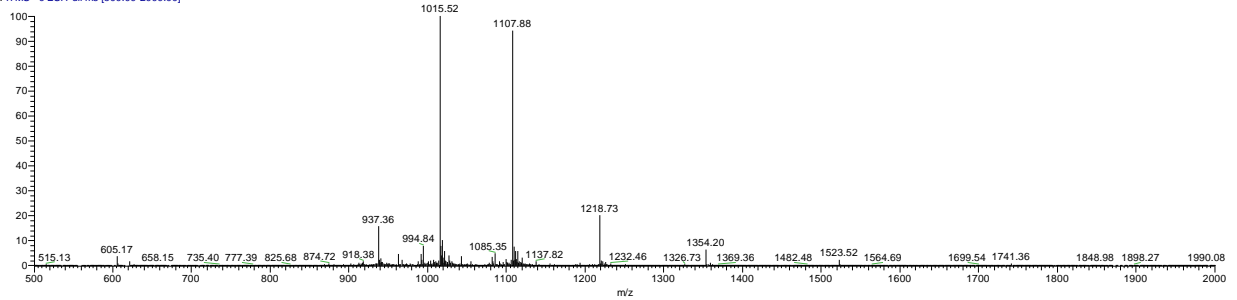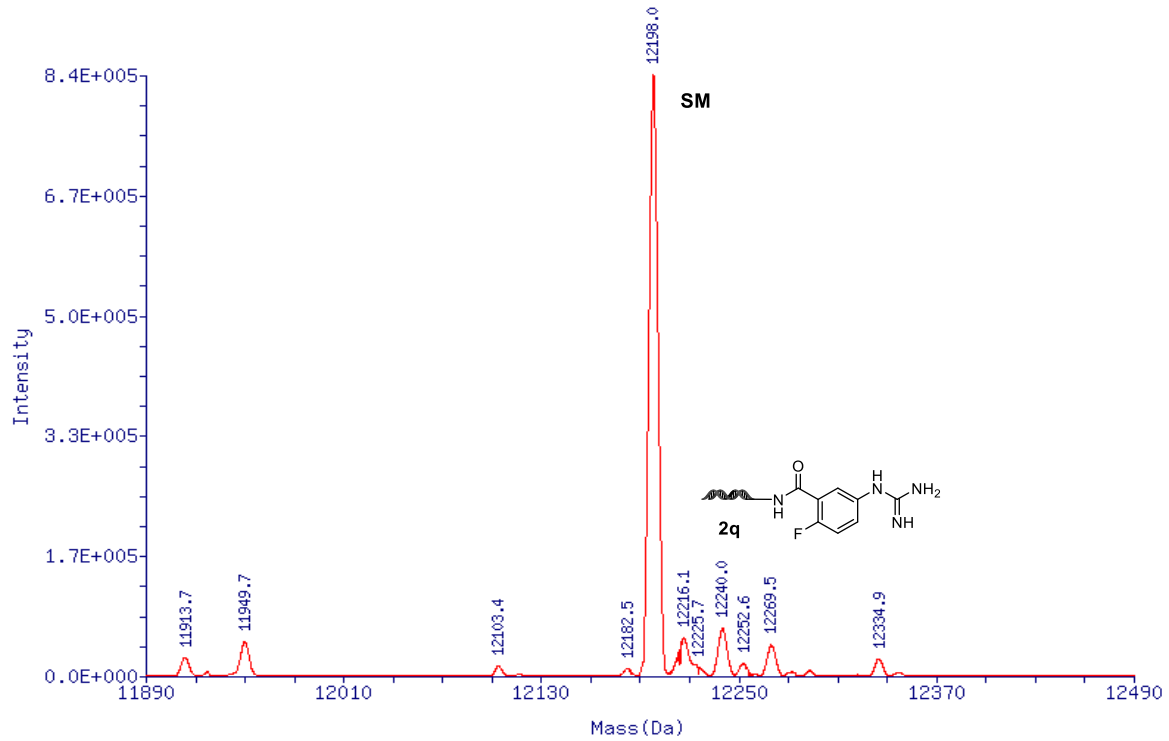

RT: 0.00 - 2.00 SM: 7B

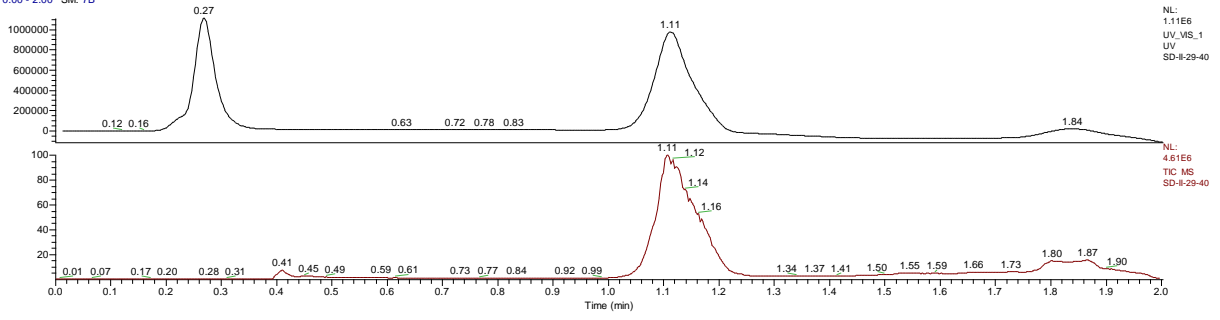

SD-II-29-40 #364-443 RT: 1.03-1.24 AV: 80 NL: 2.36E5  
T: ITMS - c ESI Full ms [500.00-2000.00]

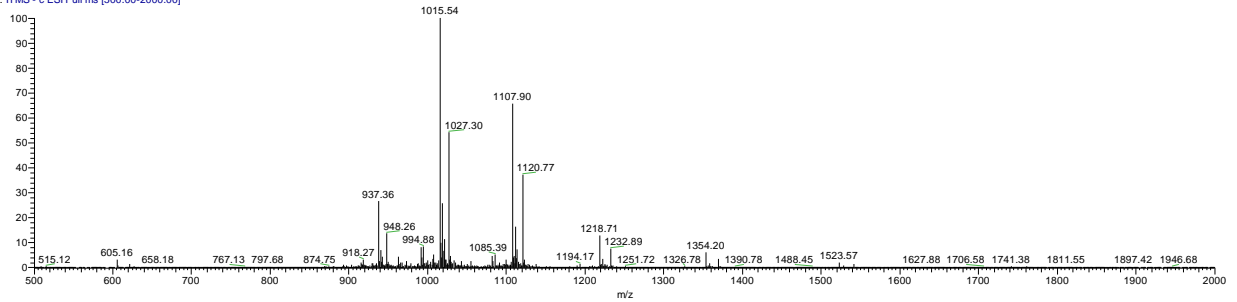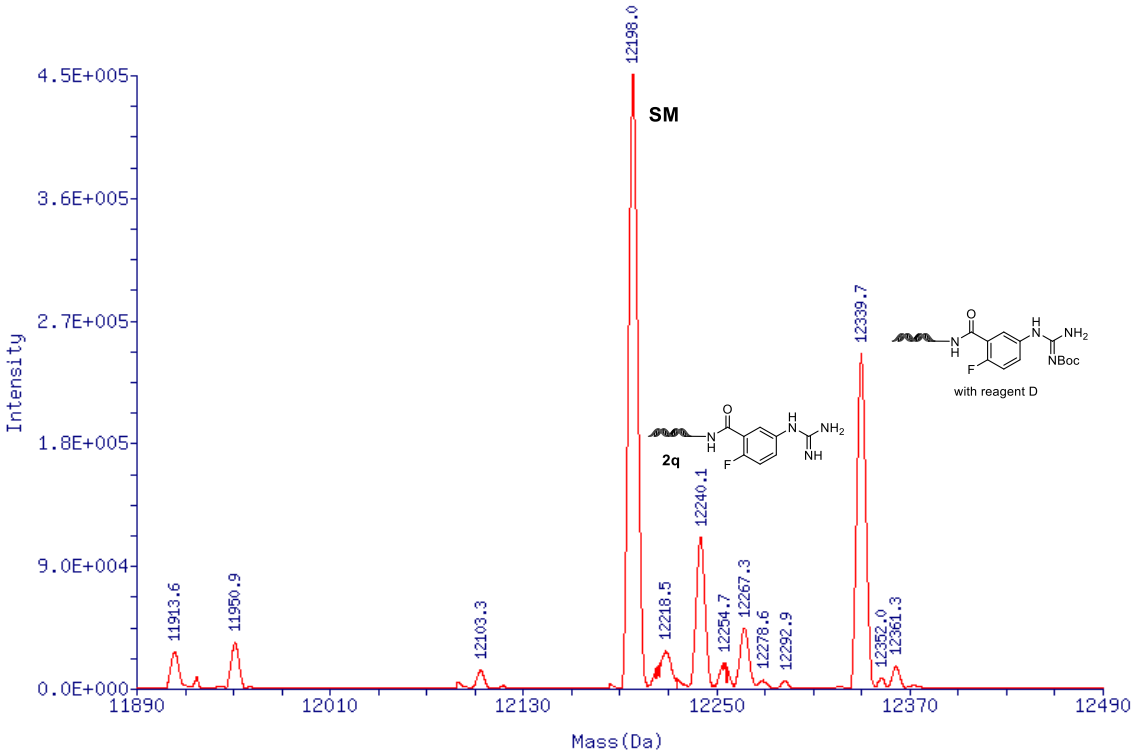

RT: 0.00 - 2.00 SM: 7B

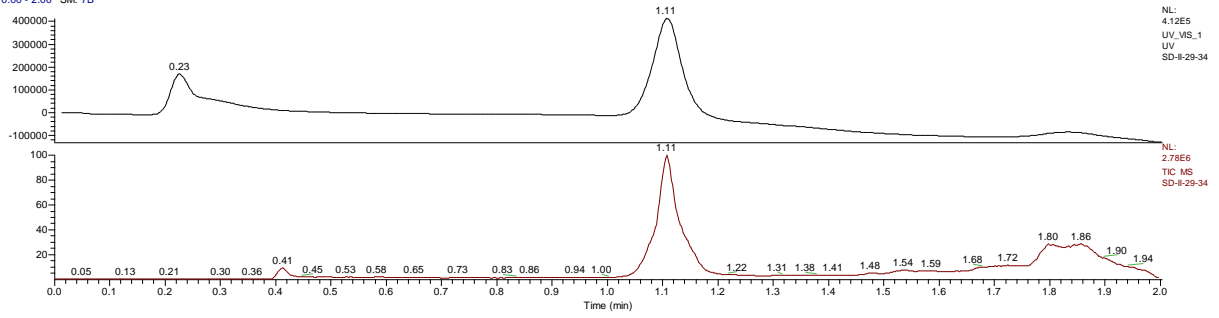

SD-II-29-34 #369-423 RT: 1.04-1.19 AV: 55 NL: 1.96E5  
T: ITMS - c ESI Full ms [500.00-2000.00]

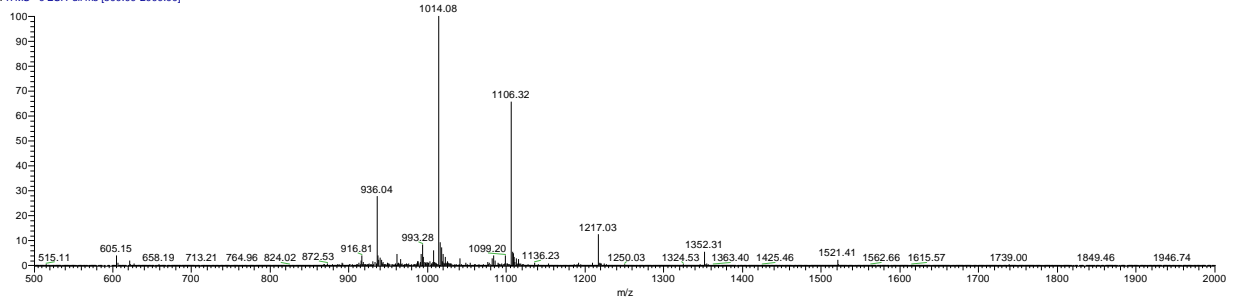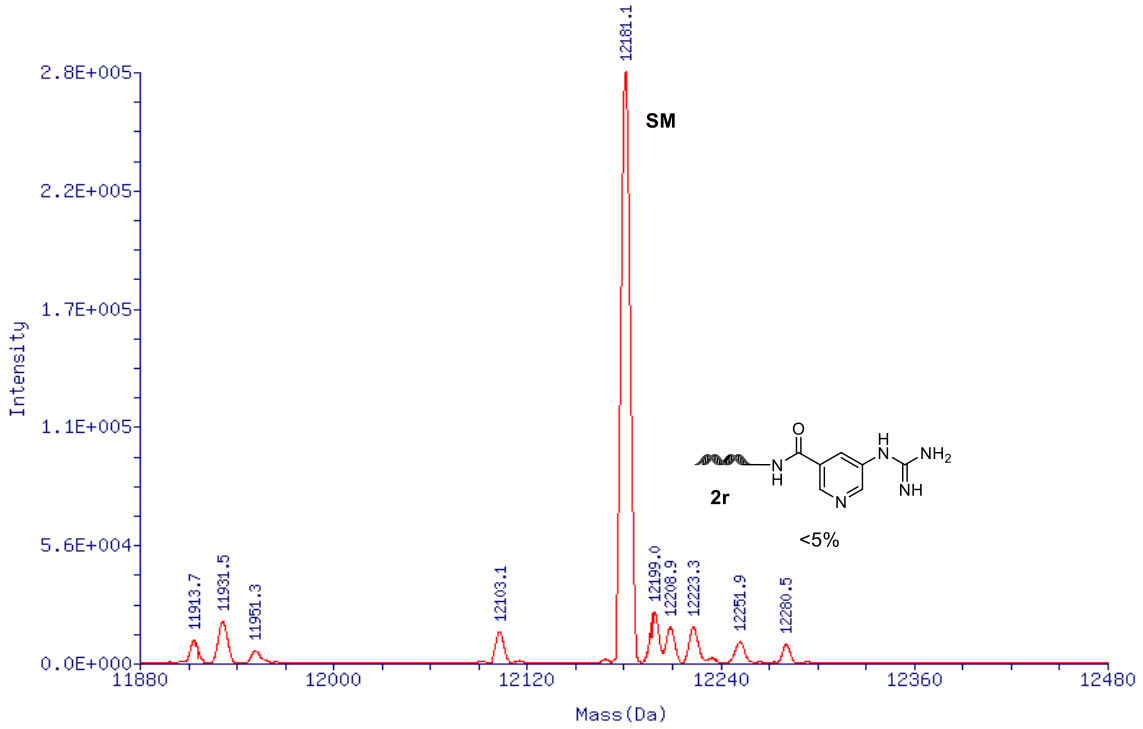

RT: 0.00 - 2.00 SM: 7B

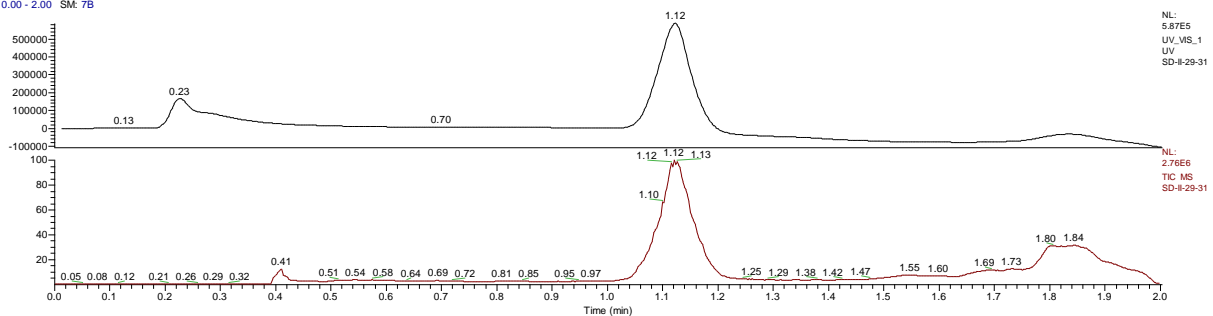

SD-I:29-31 #369-438 RT: 1.04-1.23 AV: 70 NL: 2.20E5  
T: ITMS - c ESI Full ms [500.00-2000.00]

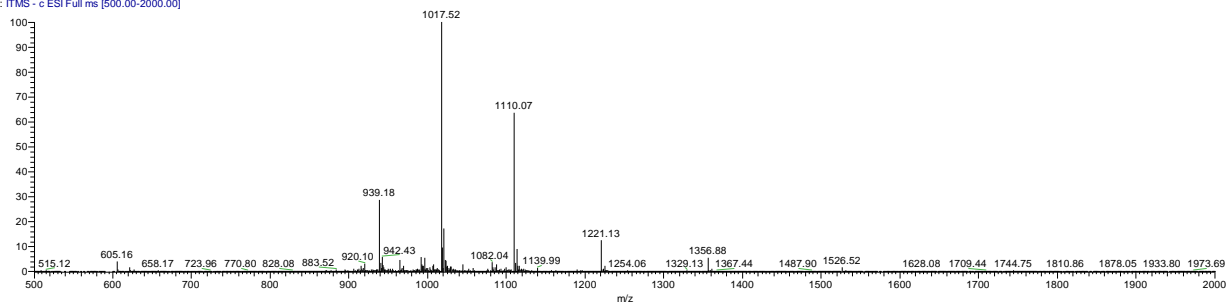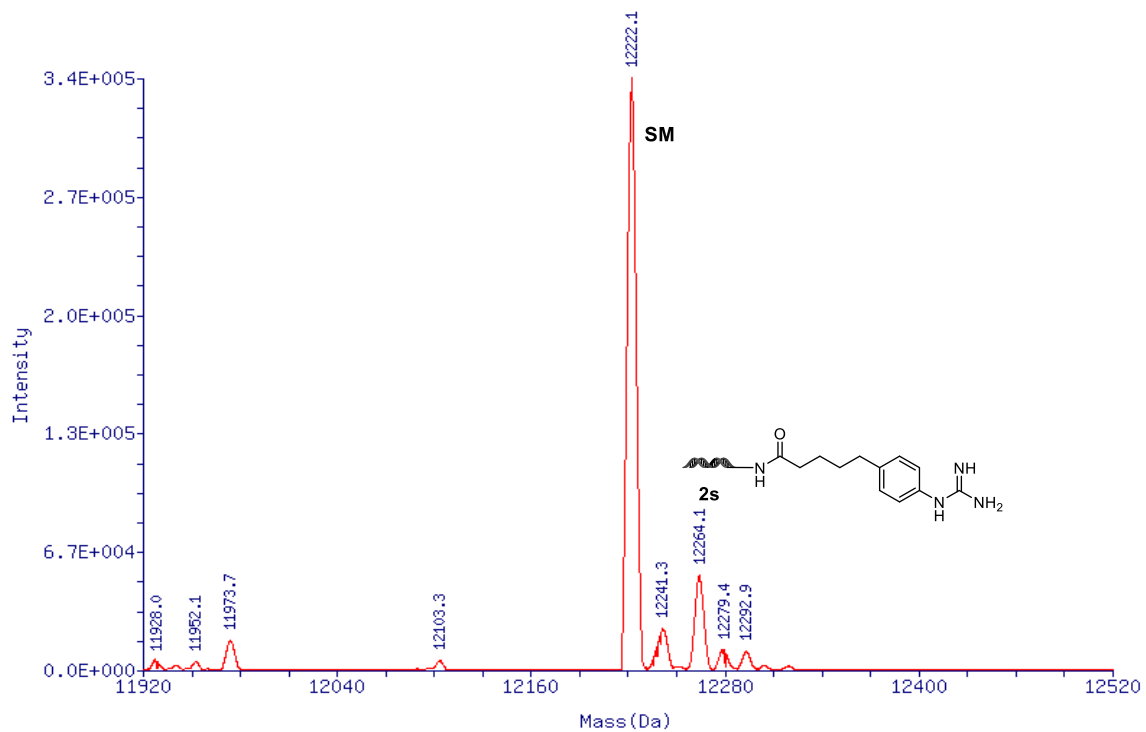



RT: 0.00 - 2.00 SM: 7B

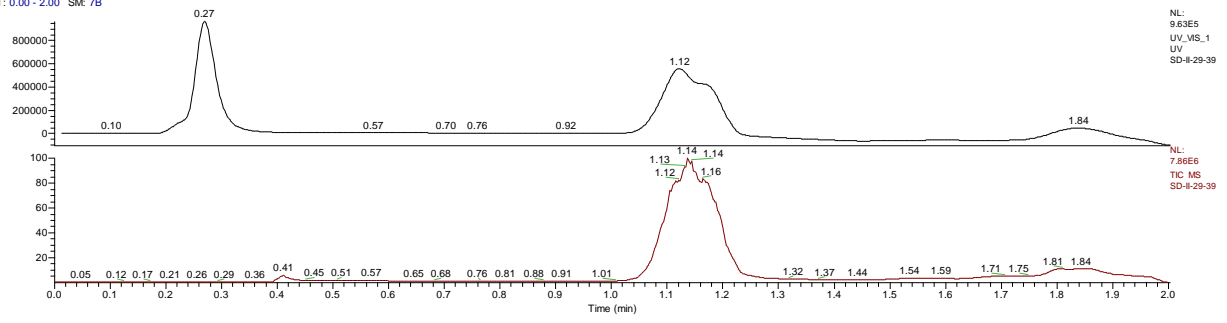

SD-II-29-39 #375-442 RT: 1.06-1.24 AV: 68 NL: 5.57E5  
T: ITMS - c ESI Full ms [500.00-2000.00]

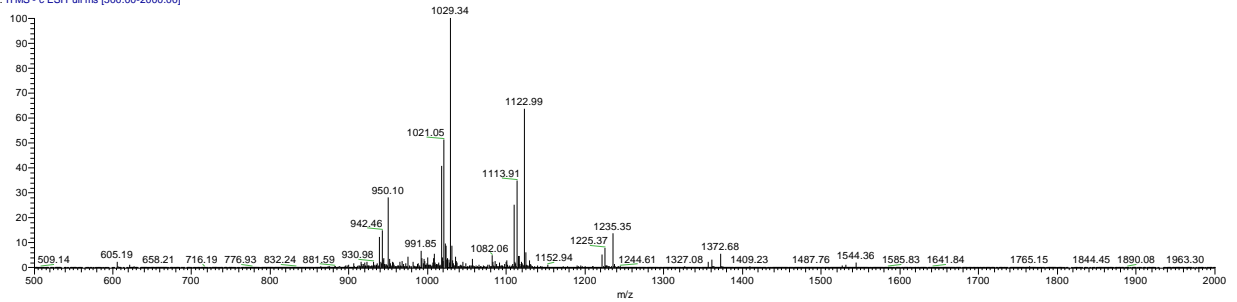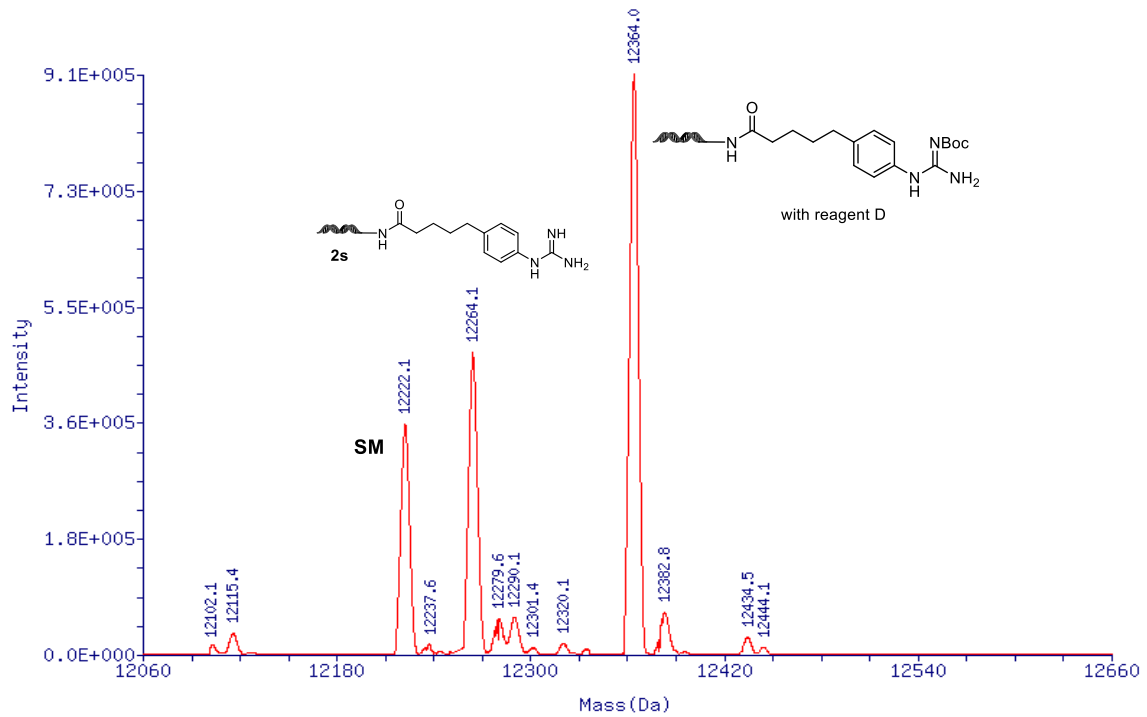

SD-II-35-2\_181211100730

8:16

RT: 0.00 - 2.00 SM: 7B

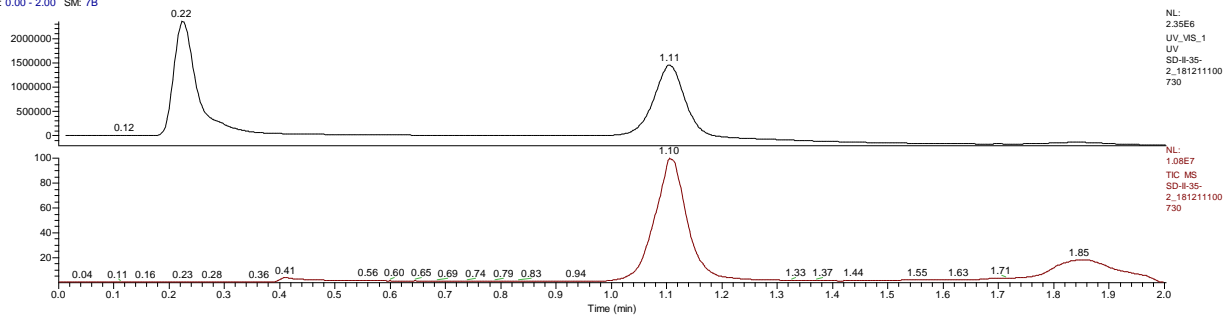

SD-II-35-2\_181211100730 #362-422 RT: 1.02-1.18 AV: 61 NL: 7.99E5  
T: FTMS - c ESI Full ms [500.00-2000.00]

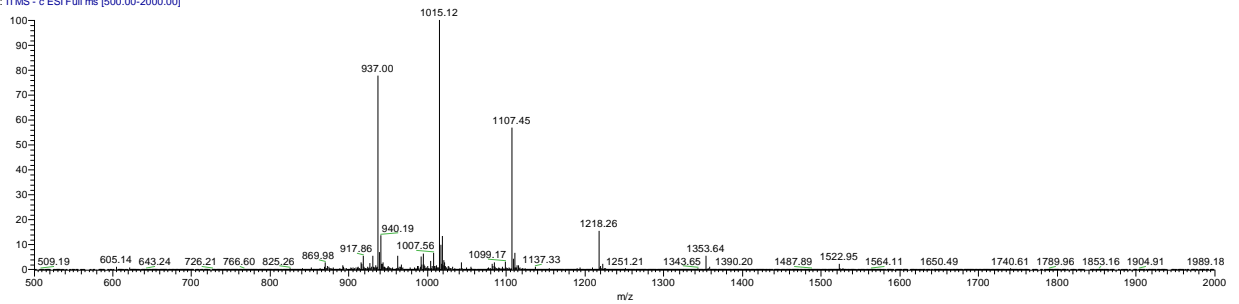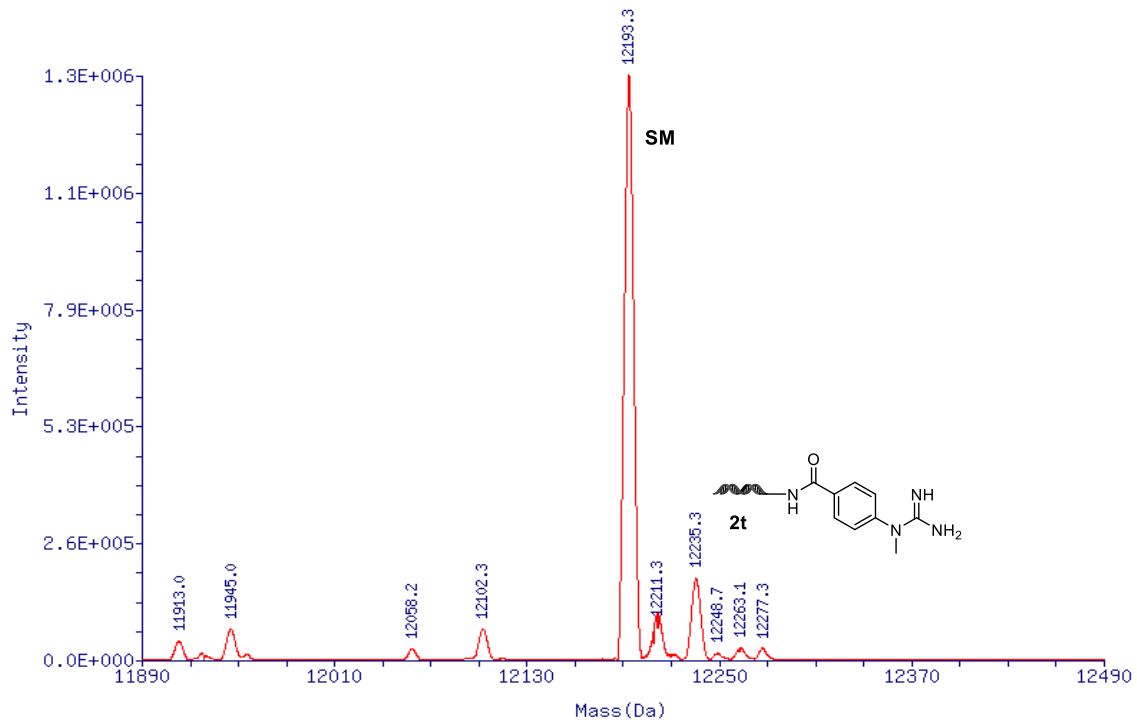

RT: 0.00 - 2.00 SM: 7B

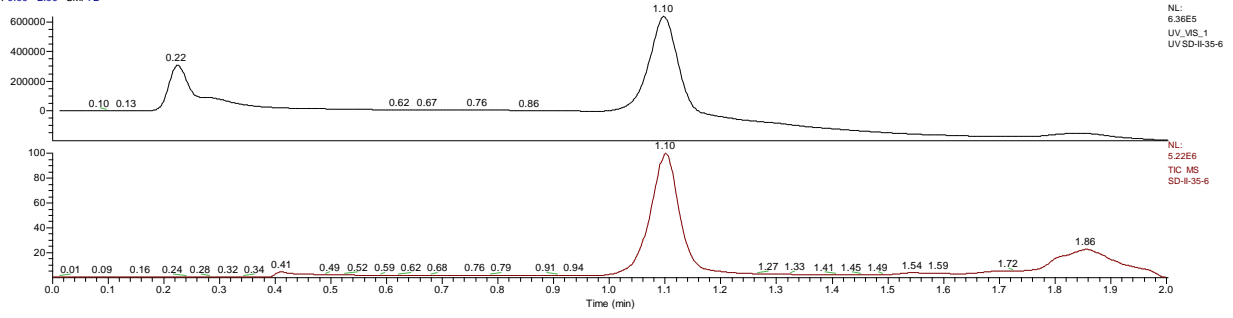

SD-II-35-6 #363-418 RT: 1.02-1.17 AV: 56 NL: 4.25E5  
T: FTMS - c ESI Full ms [500.00-2000.00]

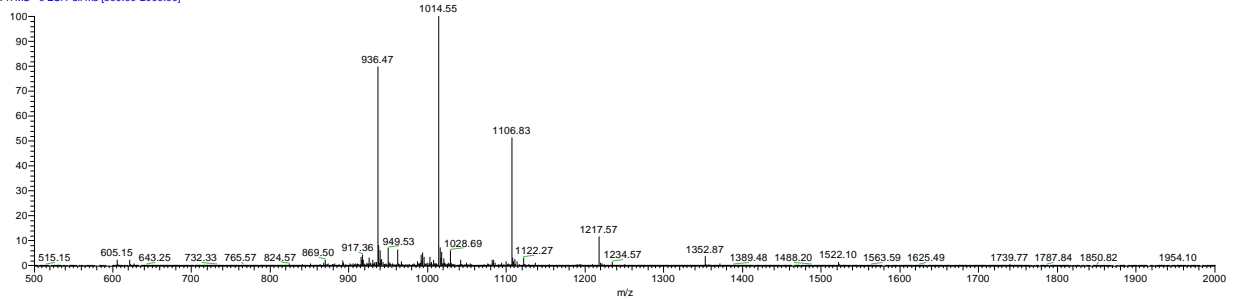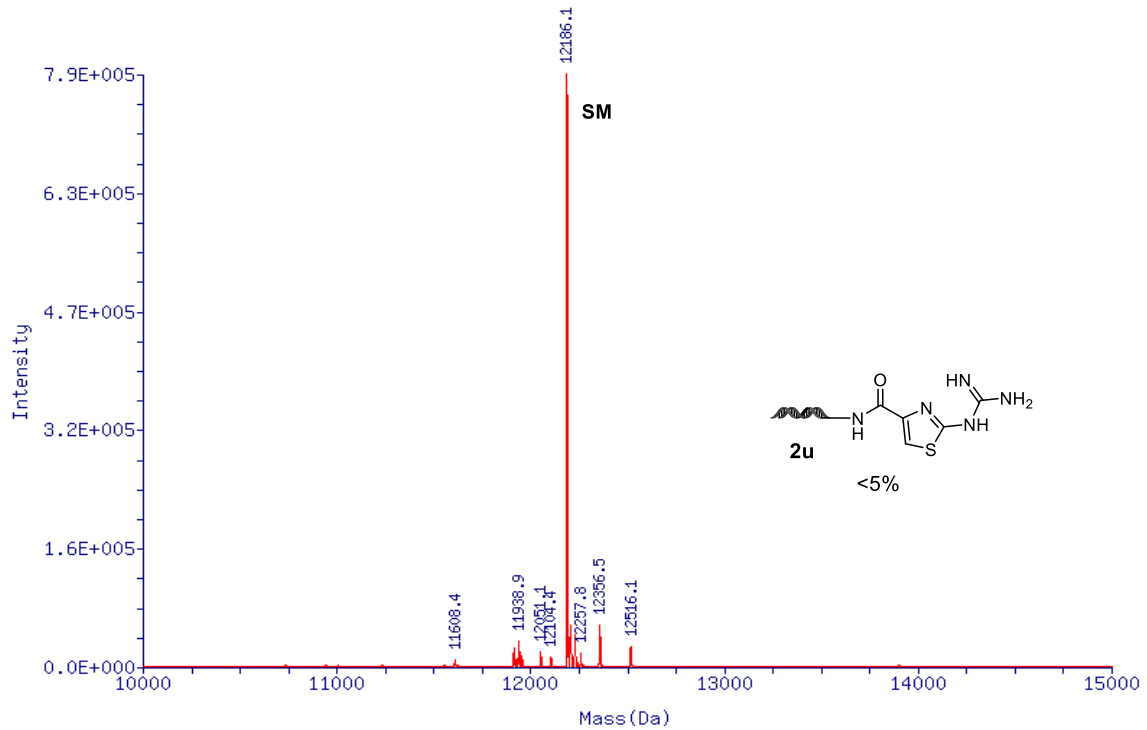

# 7c) Nitrile reduction

C:\Analytical\...17312018\SD

3:27

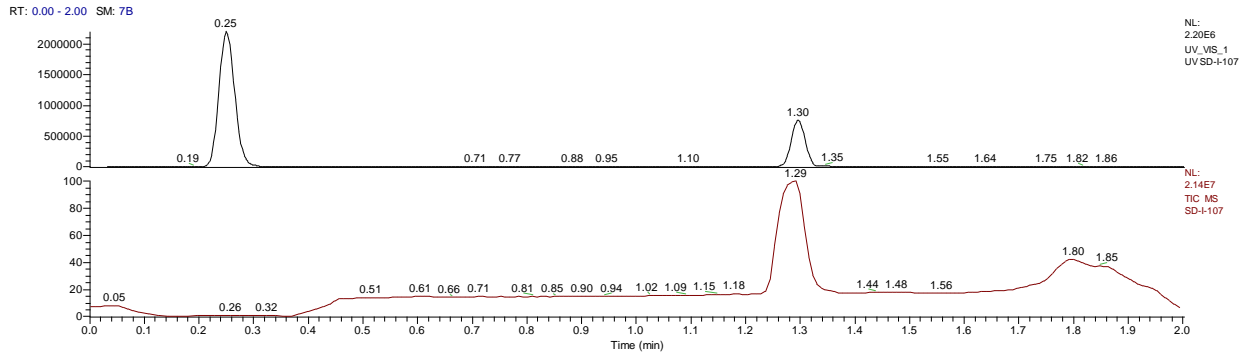

SD-I-107 #129-147 RT: 1.23-1.37 AV: 19 NL: 1.61E6  
T: ITMS - c ESI Full ms [500.00-2000.00]

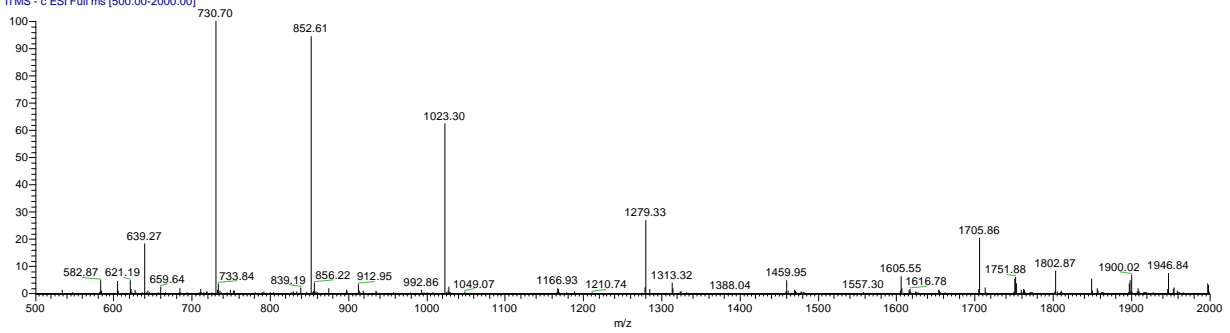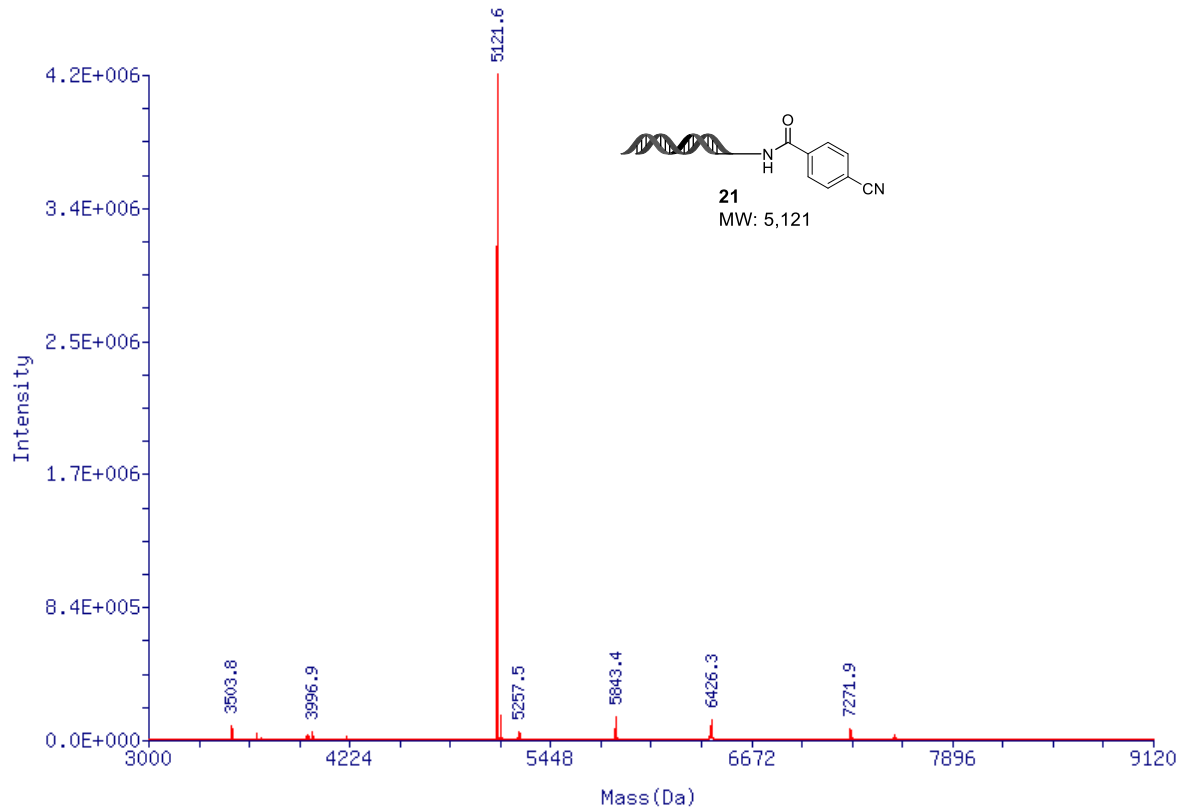

RT: 0.00 - 2.00 SM: 7B

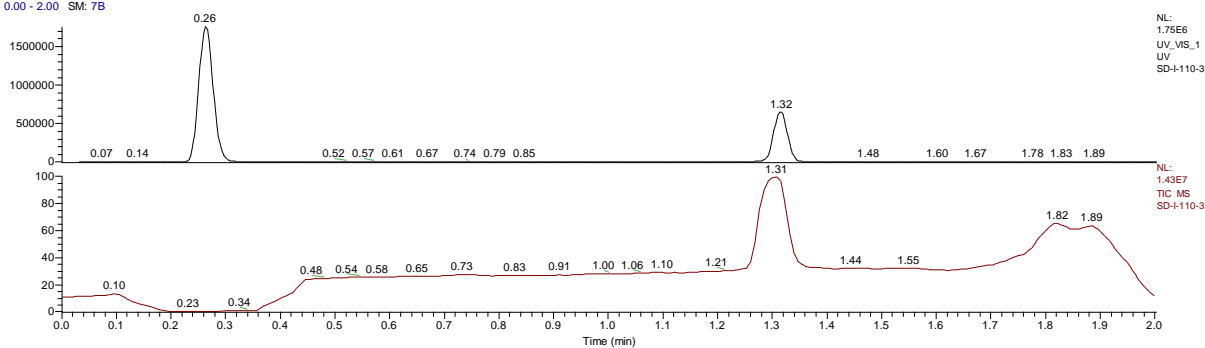SD-I-110-3 #134-149 RT: 1.24-1.36 AV: 16 NL: 1.08E6  
T: ITMS - c ESI Full ms [500.00-2000.00]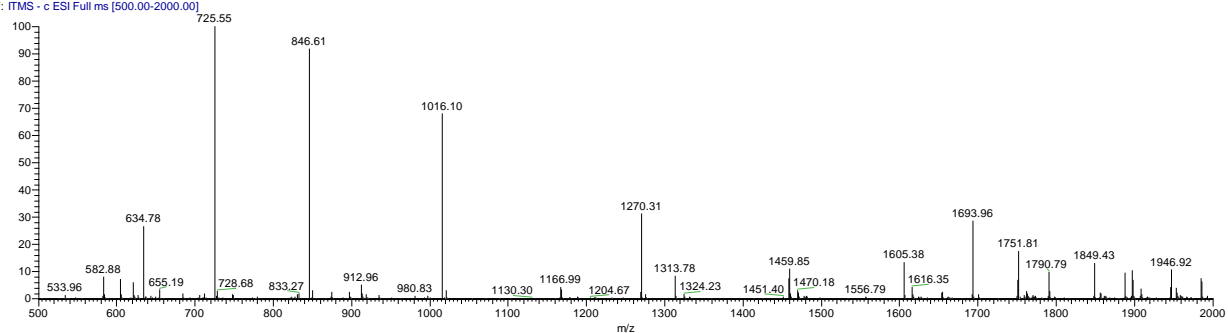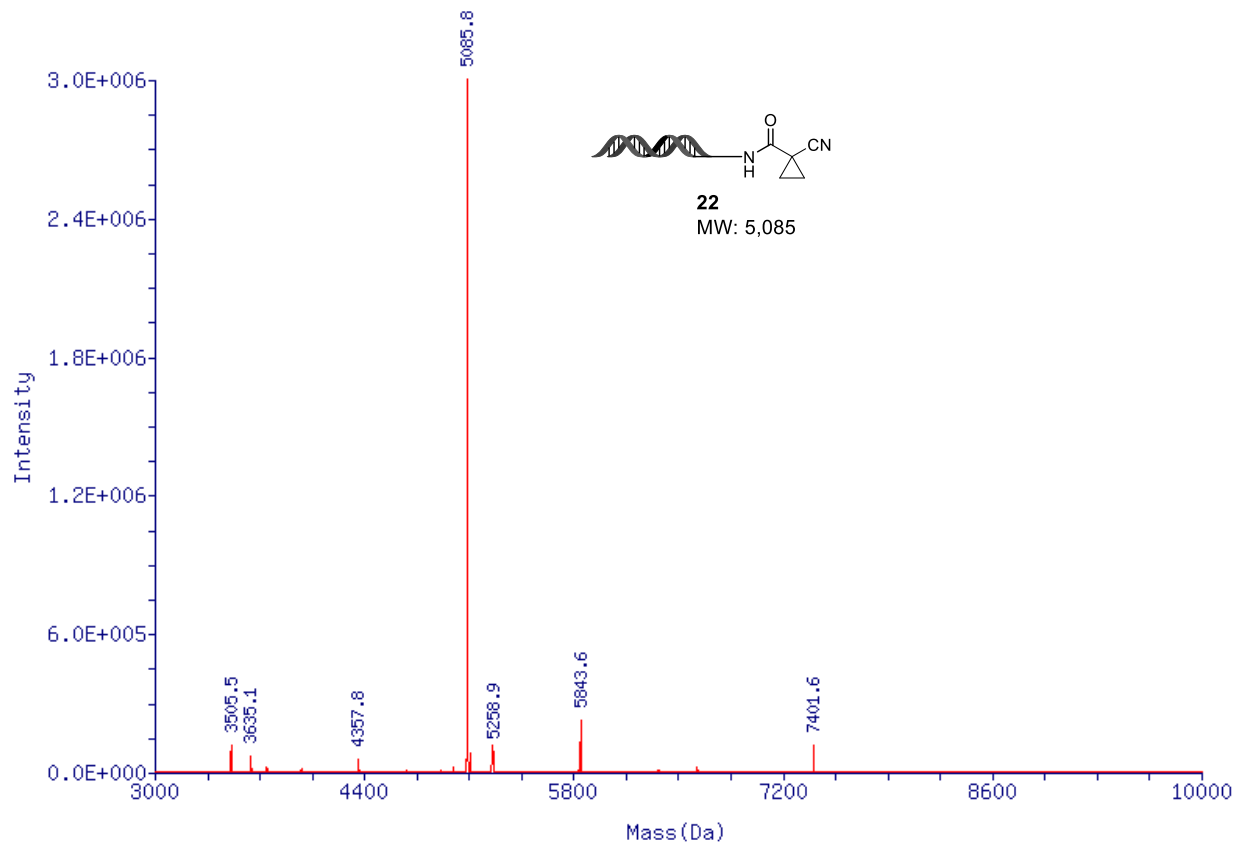

SD-I-109-2\_180801163315

3:15

RT: 0.00 - 10.00 SM: 7B

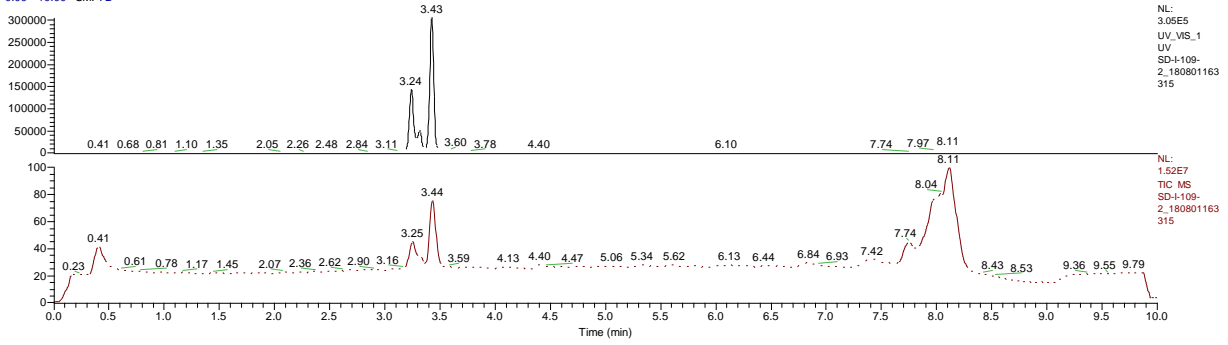

SD-I-109-2\_180801163315 #379-403 RT: 3.16-3.35 AV: 25 NL: 3.05E5  
T: ITMS - c ESI Full ms [500.00-2000.00]

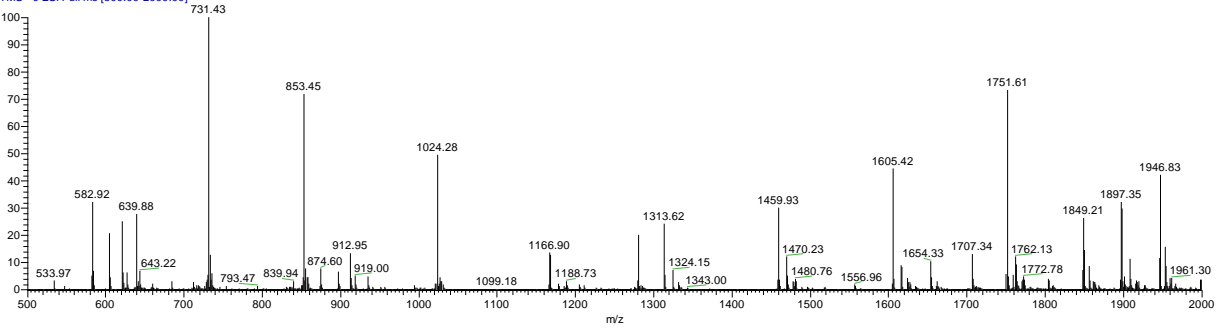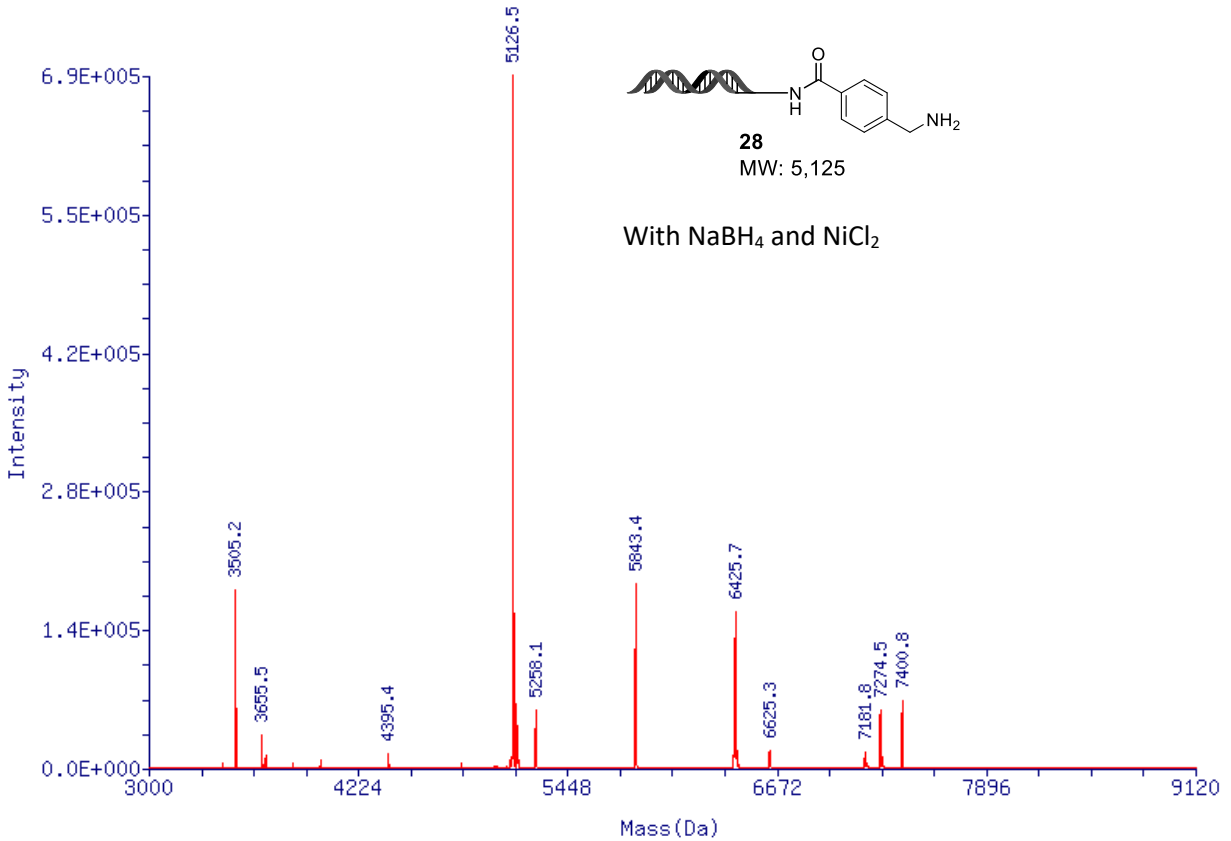

SD-I-116-3\_180808113454

4.54

RT: 0.00 - 10.00 SM: 7B

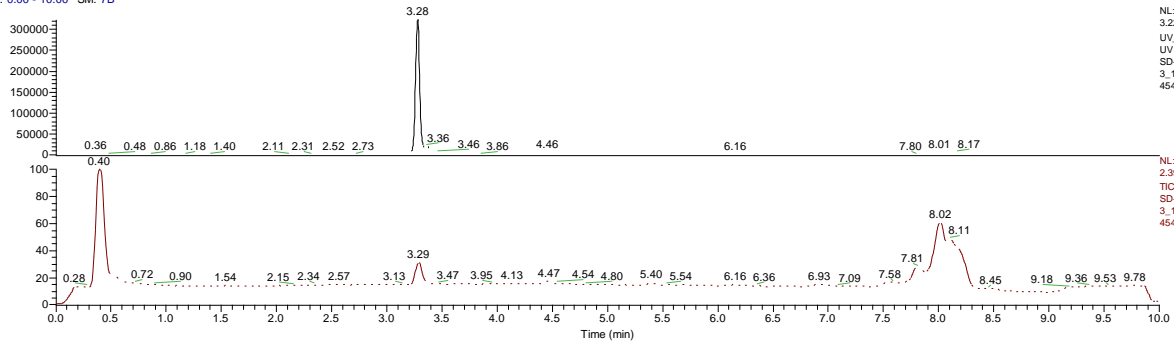

NL:  
3.22E5  
UV\_VIS\_1  
UV  
SD-I-116-  
3\_180808113  
454

NL:  
2.39E7  
TIC MS  
SD-I-116-  
3\_180808113  
454

SD-I-116-3\_180808113454 #380-415 RT: 3.17-3.45 AV: 36 NL: 2.50E5  
T: ITMS - c ESI Full ms [500.00-2000.00]

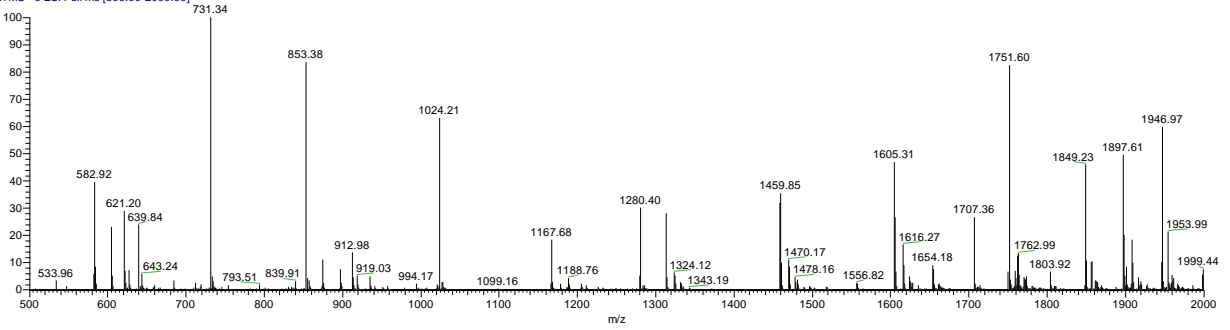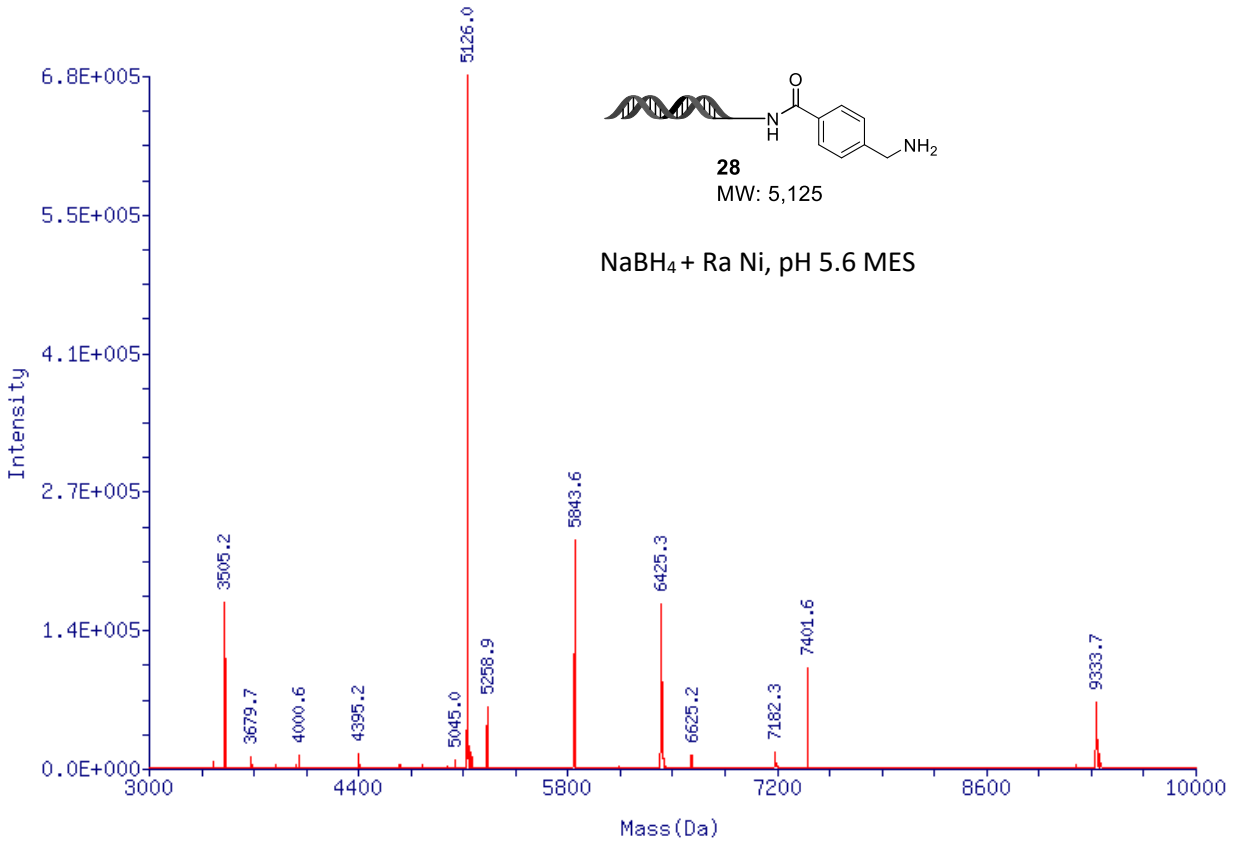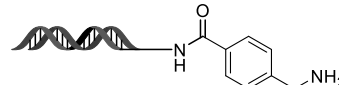

**28**  
MW: 5,125

NaBH<sub>4</sub> + Ra Ni, pH 5.6 MES

SD-I-116-6\_180808120700

7.00

RT: 0.00 - 10.00 SM: 7B

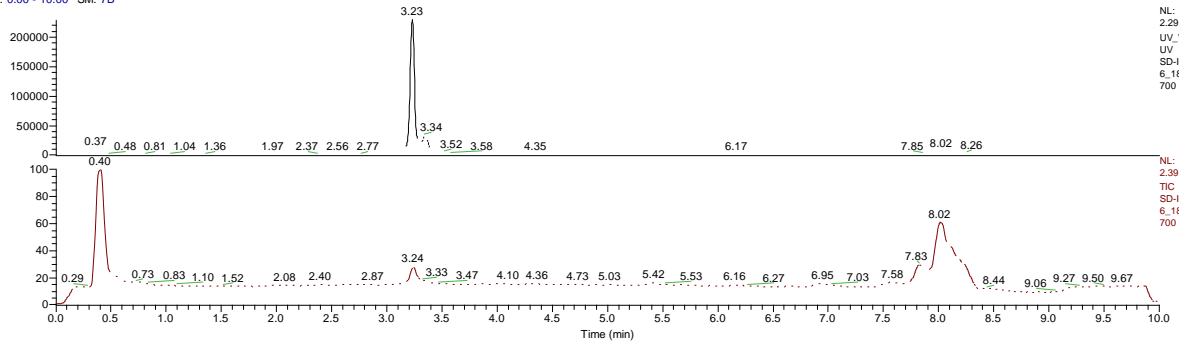

NL:  
2.29E5  
UV\_VIS\_1  
UV  
SD-I-116-  
6\_180808120  
700

NL:  
2.39E7  
TIC MS  
SD-I-116-  
6\_180808120  
700

SD-I-116-6\_180808120700 #371-416 RT: 3.09-3.45 AV: 46 NL: 2.44E5  
T: ITMS - c ESI Full ms [500.00-2000.00]

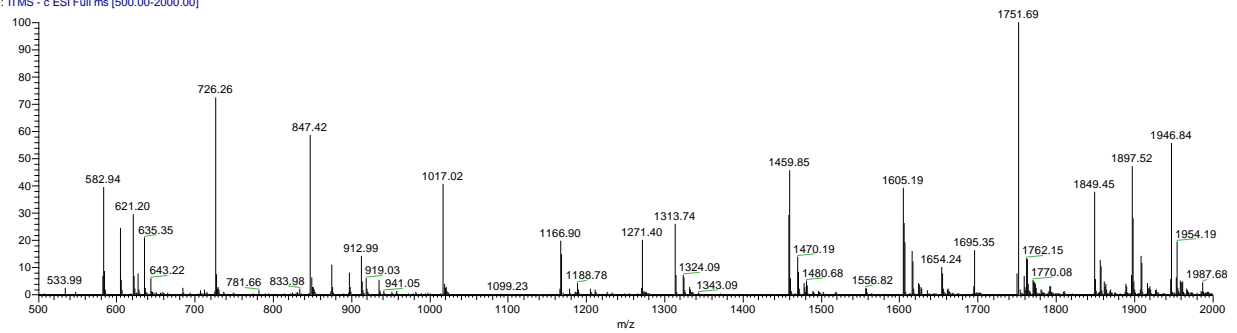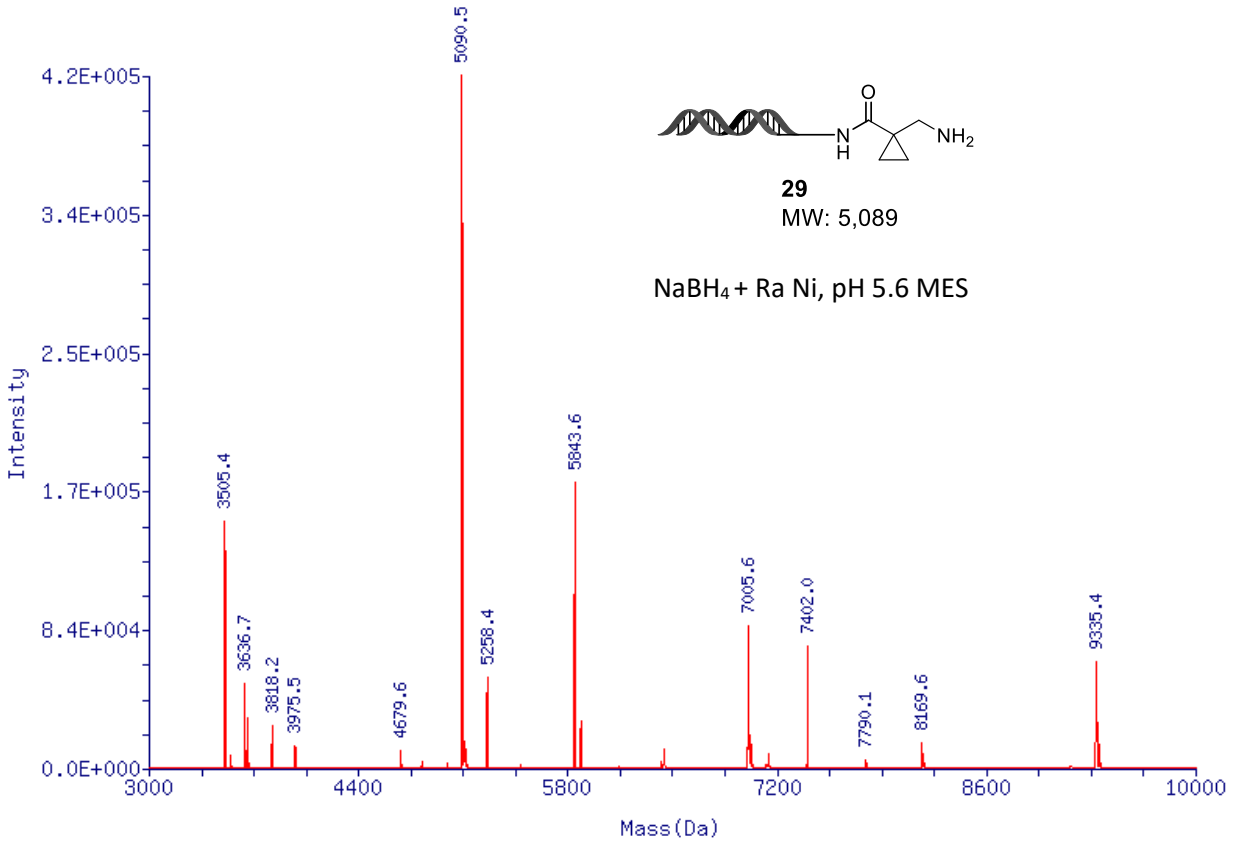



RT: 0.00 - 2.00 SM: 7B

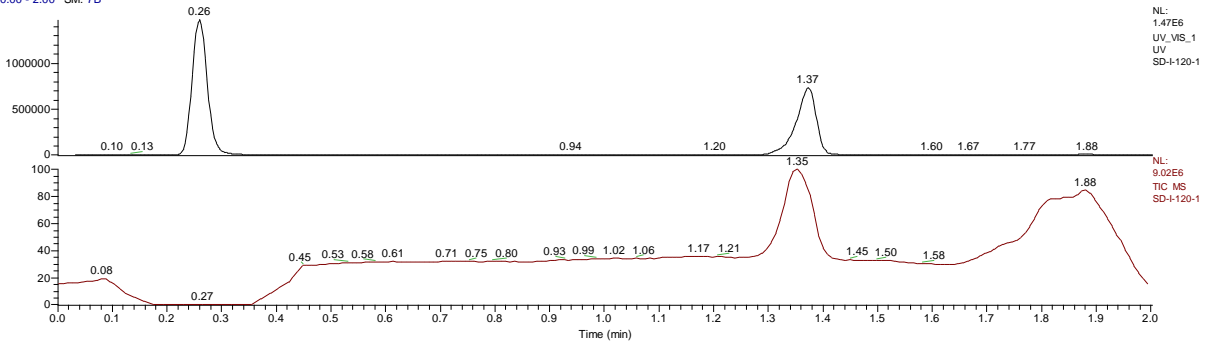

SD-I-120-1 #136-156 RT: 1.28-1.44 AV: 21 NL: 3.78E5  
T: ITMS - c ESI Full ms [500.00-2000.00]

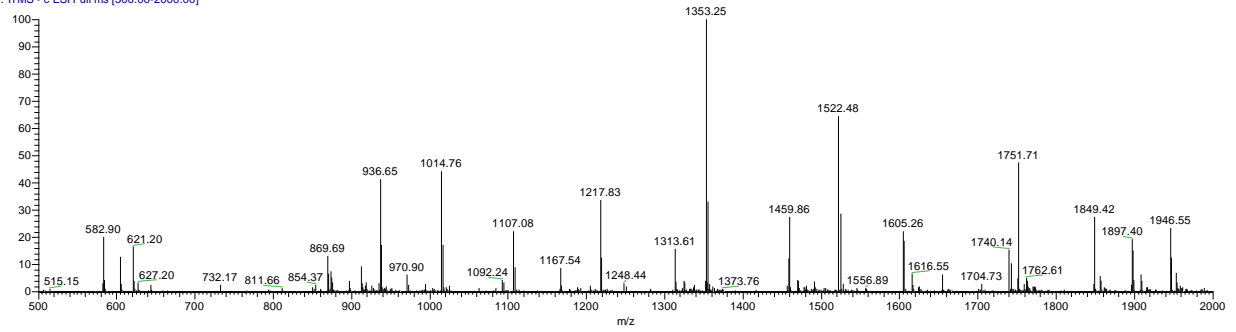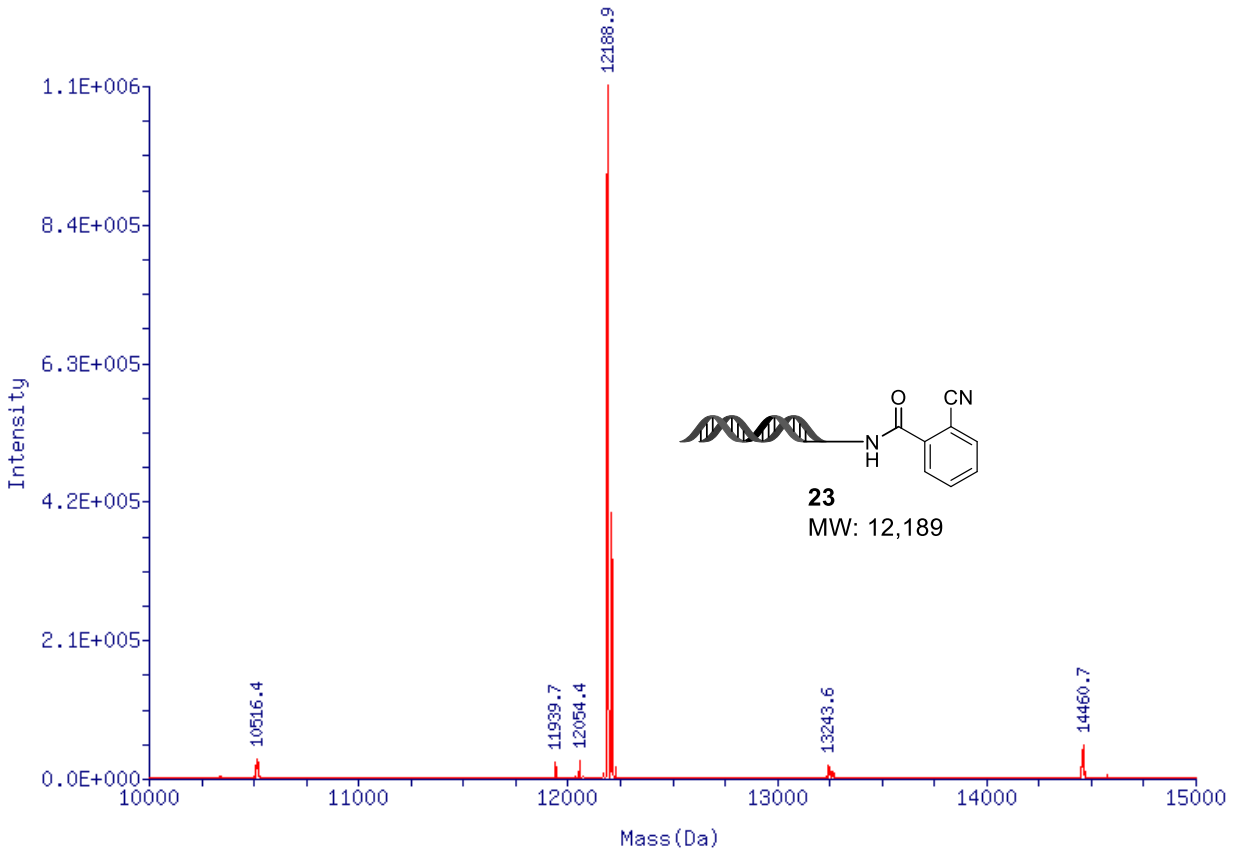

RT: 0.00 - 2.00 SM: 7B

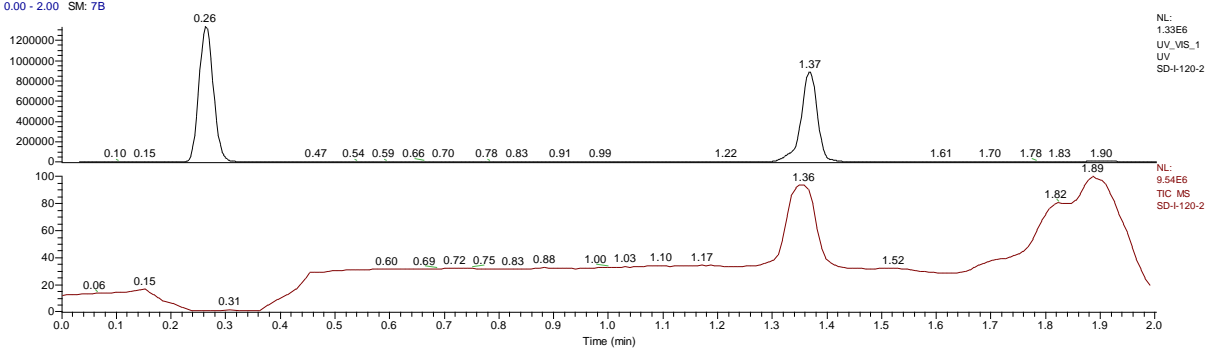SD-I-120-2 #139-156 RT: 1.28-1.41 AV: 18 NL: 5.72E5  
T: ITMS - c ESI Full ms [500.00-2000.00]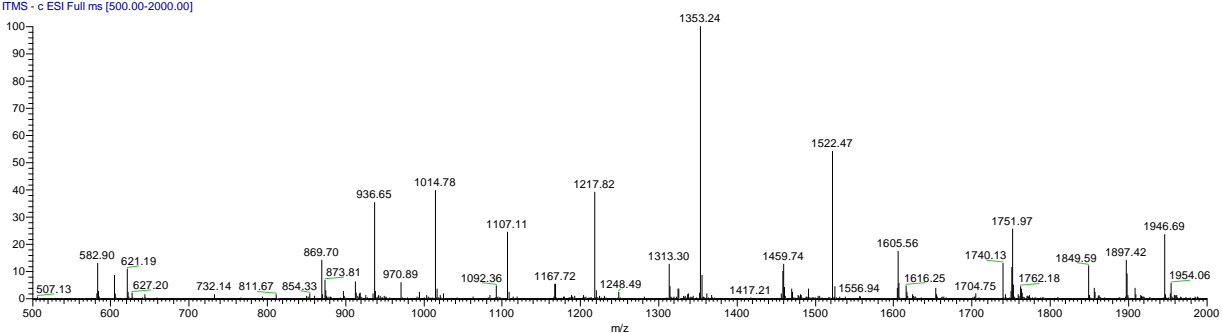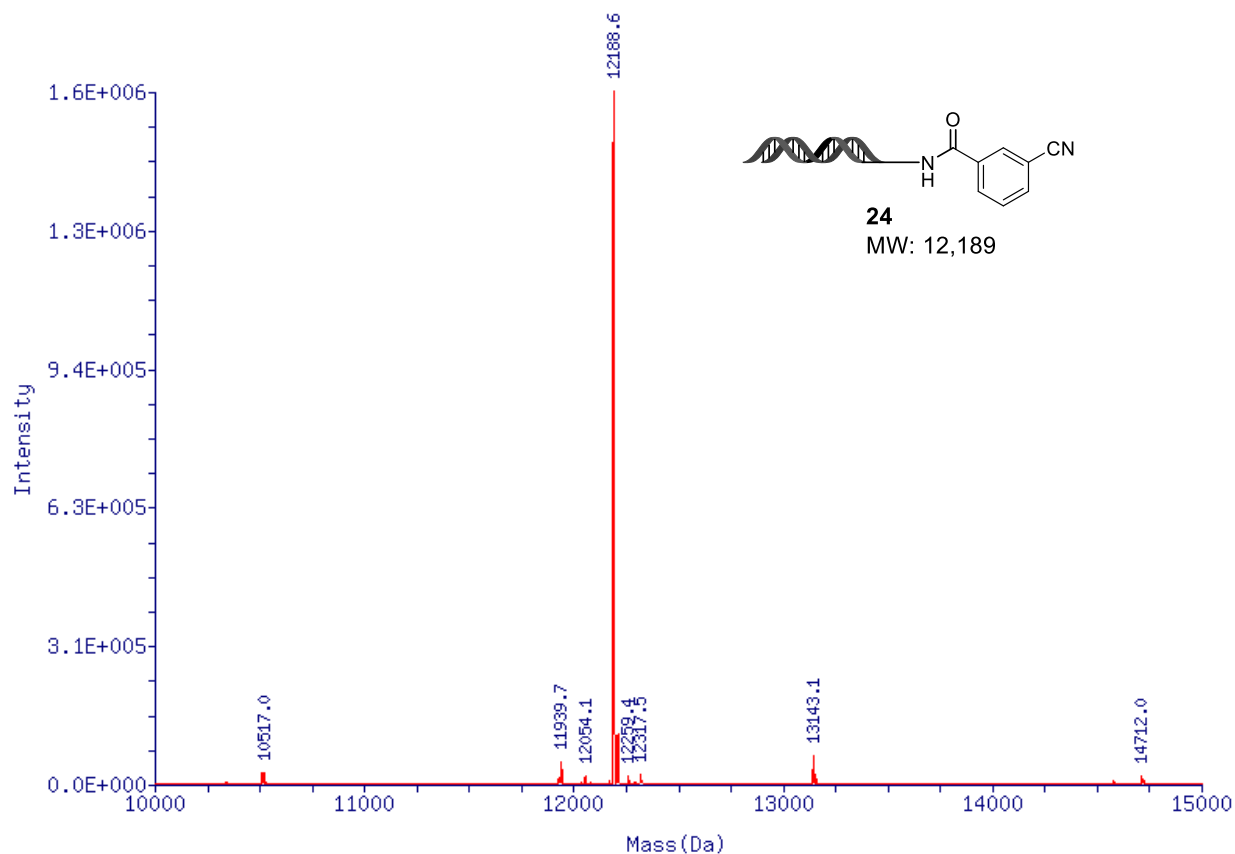

RT: 0.00 - 2.00 SM: 7B

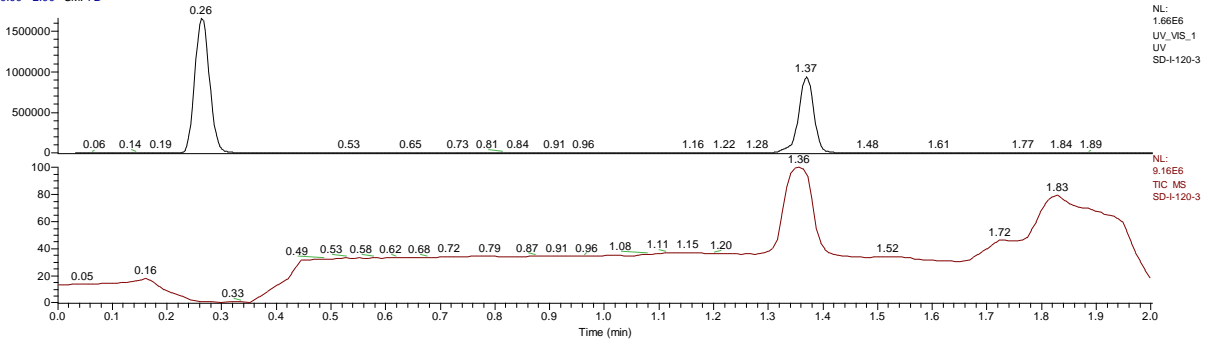

SD-I-120-3 #140-160 RT: 1.28-1.44 AV: 21 NL: 4.80E5  
T: ITMS - c ESI Full ms [500.00-2000.00]

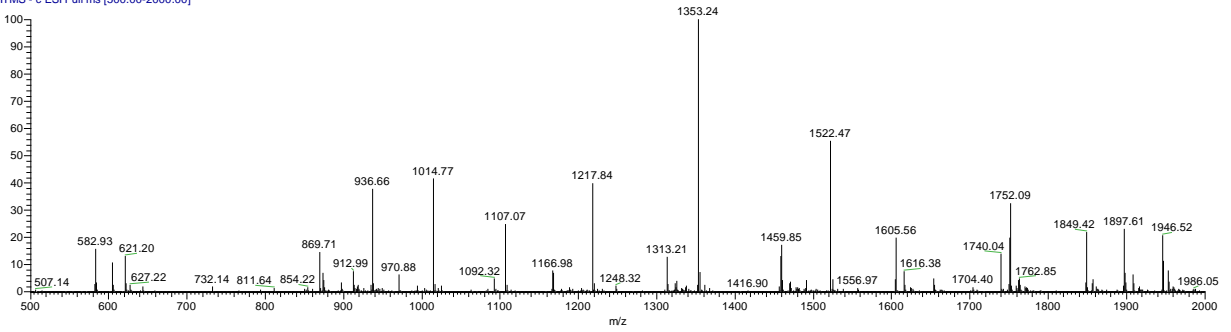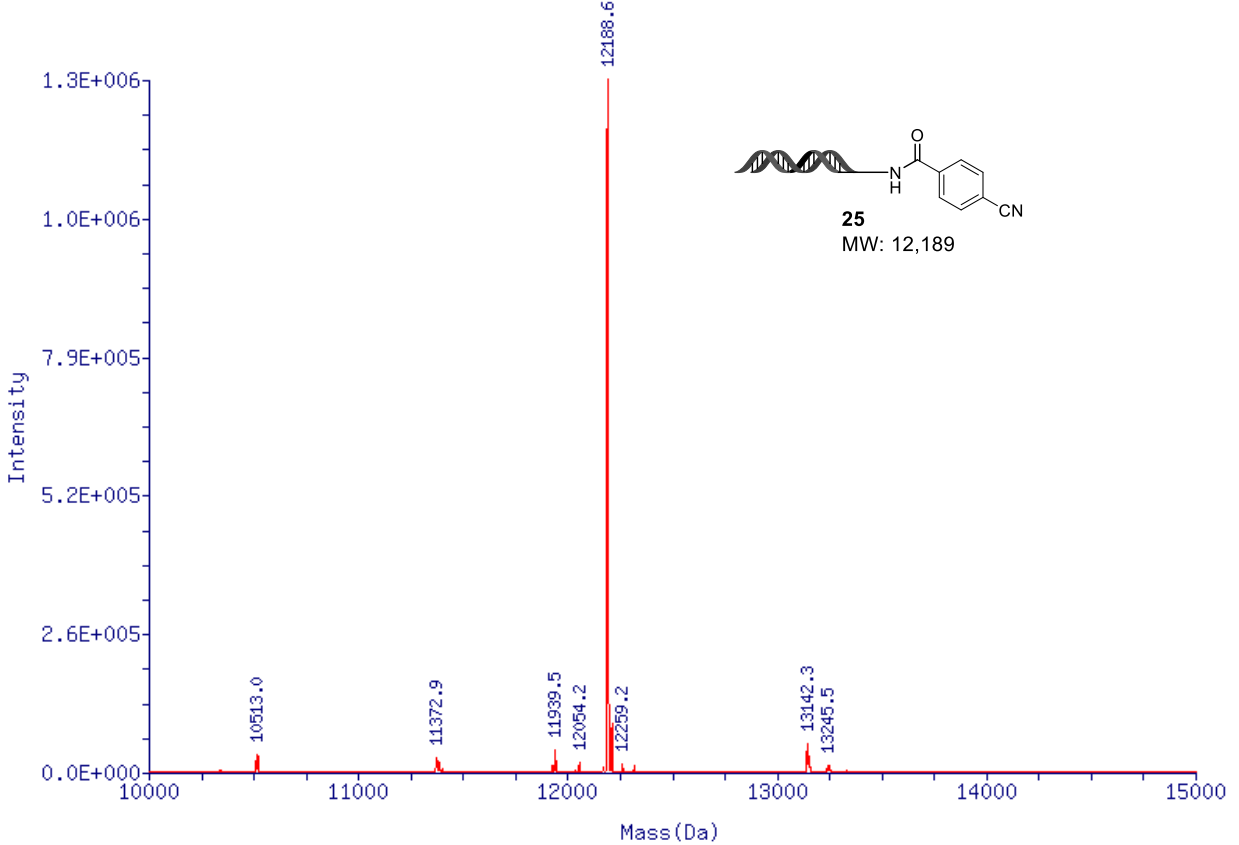

RT: 0.00 - 2.00 SM: 7B

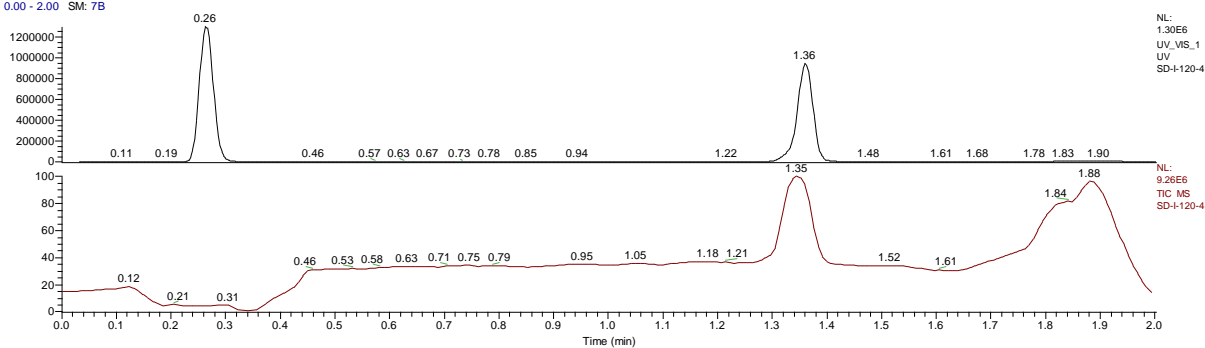SD-I-120-4 #138-154 RT: 1.27-1.40 AV: 17 NL: 6.17E5  
T: ITMS - c ESI Full ms [500.00-2000.00]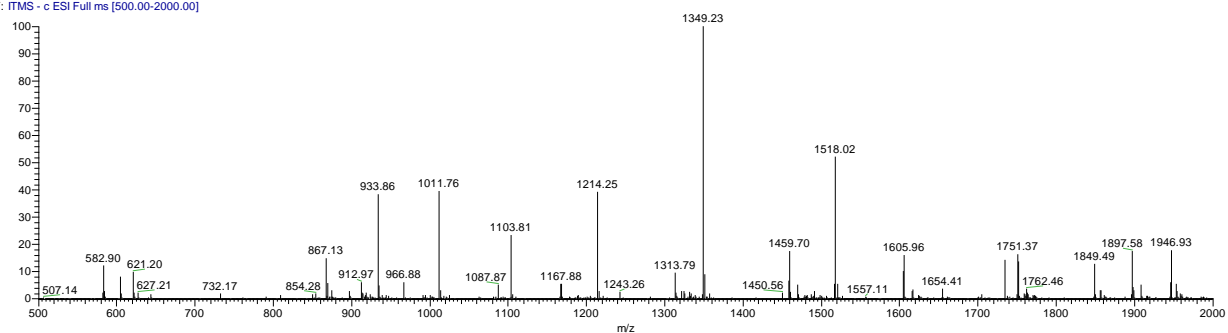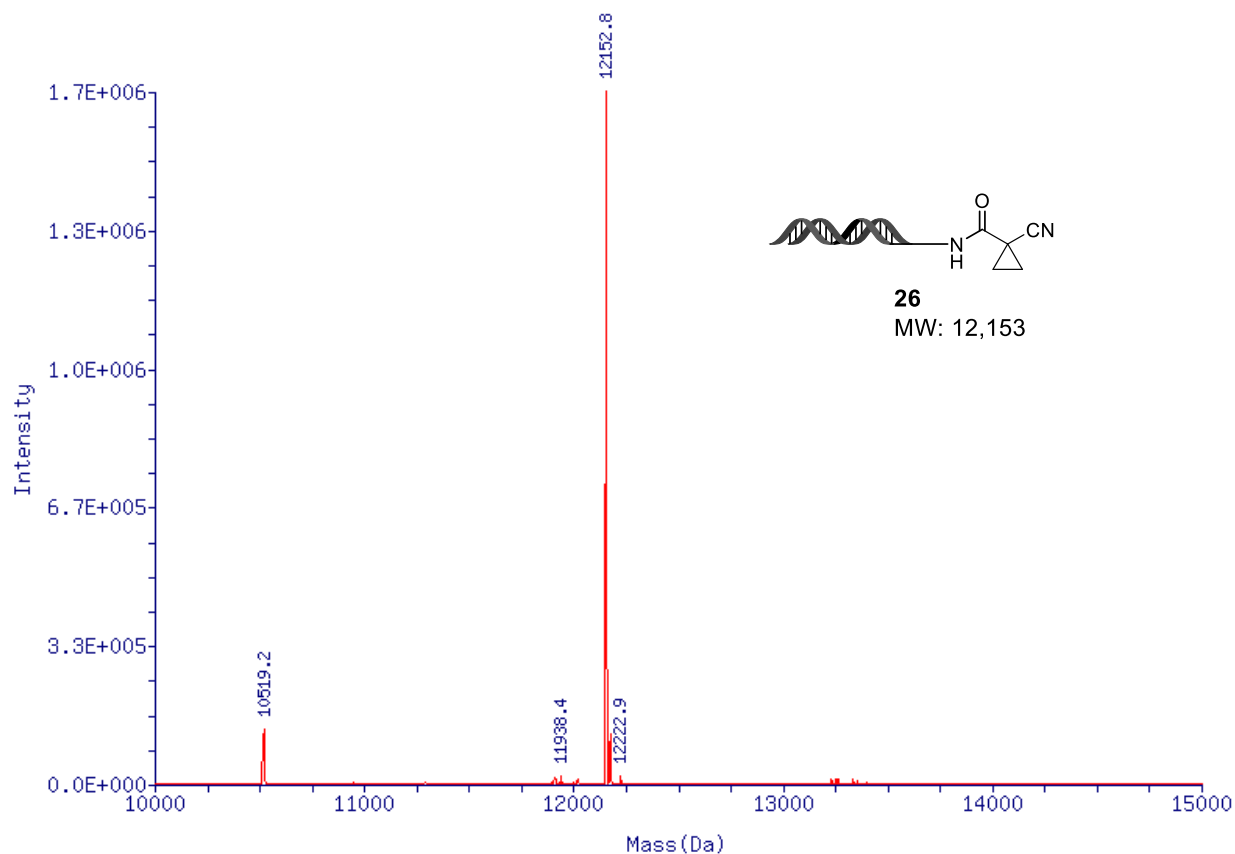

RT: 0.00 - 2.00 SM: 7B

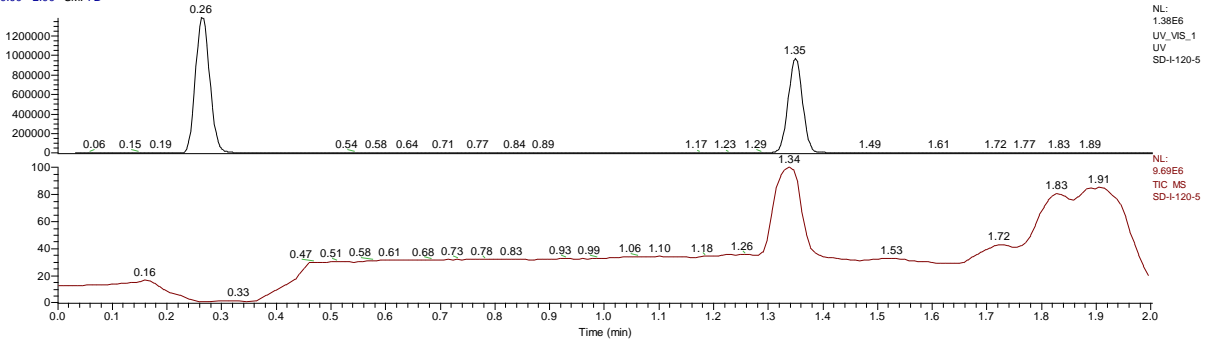

SD-I-120-5 #140-154 RT: 1.28-1.39 AV: 15 NL: 6.63E5  
T: FTMS - c ESI Full ms [500.00-2000.00]

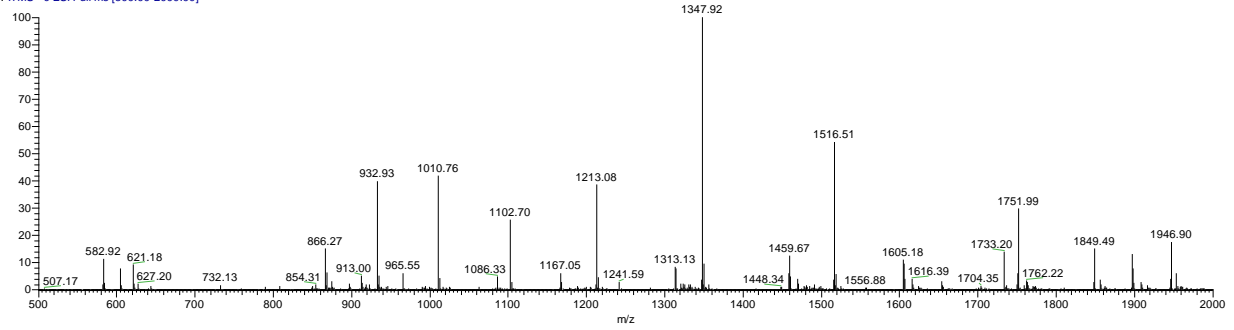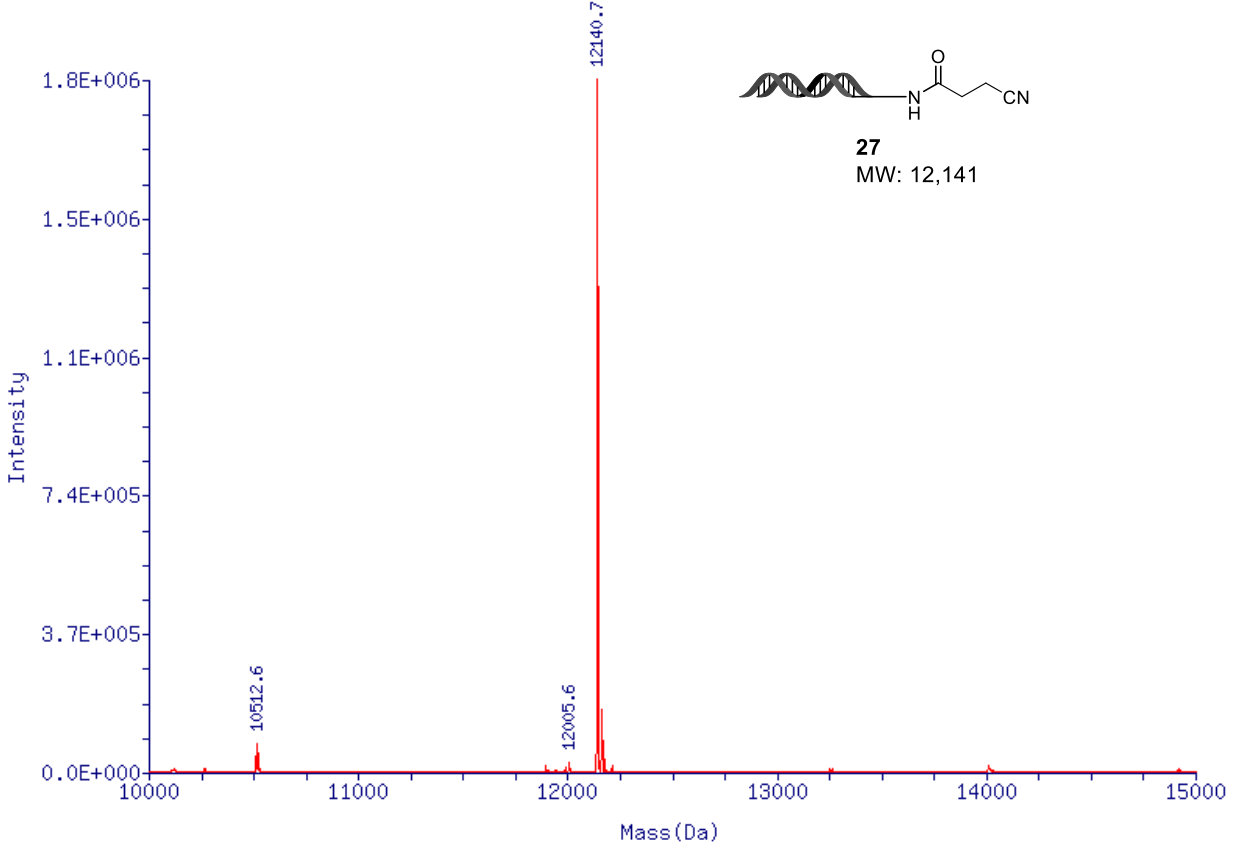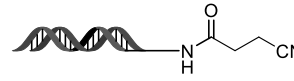

**27**  
MW: 12,141

RT: 0.00 - 2.00 SM: 7B

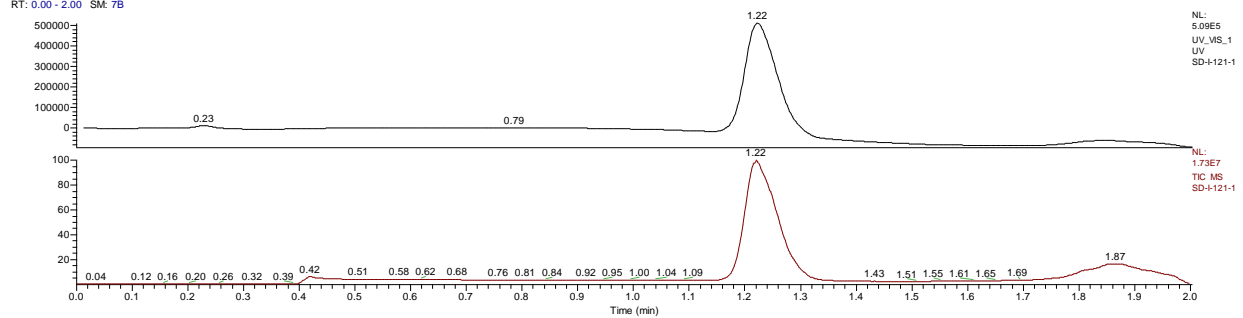

SD-I121-1 #408-476 RT: 1.15-1.33 AV: 69 NL: 8.27E5  
T: ITMS - c ESI Full ms [500.00-2000.00]

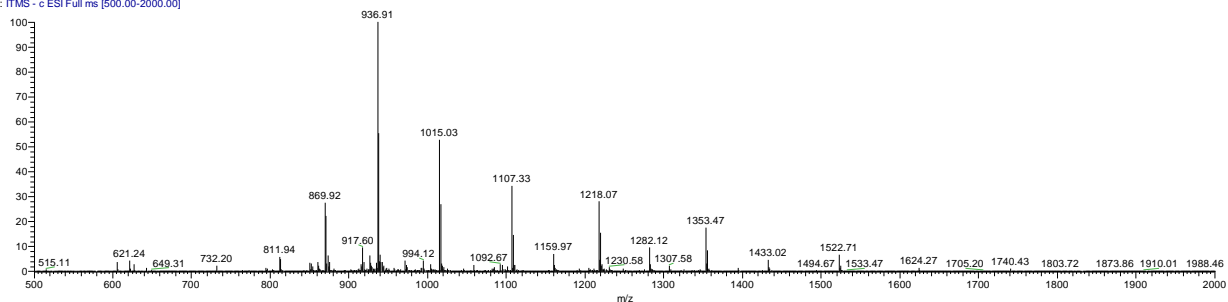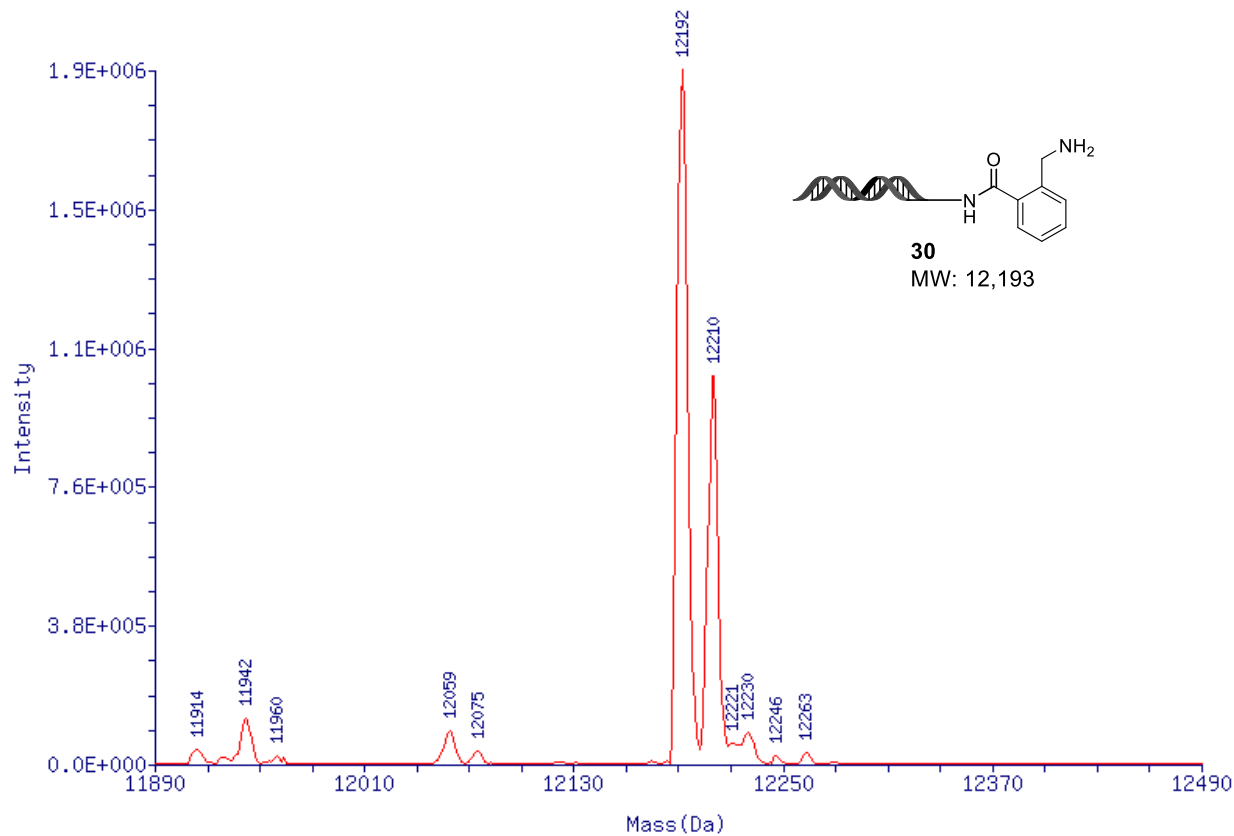

RT: 0.00 - 2.00 SM: 7B

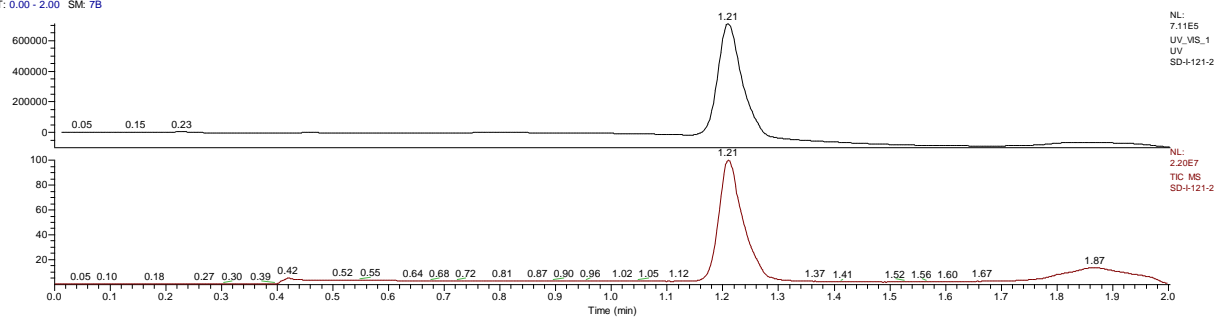

SD-I121-2 #410-467 RT: 1.16-1.31 AV: 58 NL: 1.73E6  
T: ITMS - c ESI Full ms [500.00-2000.00]

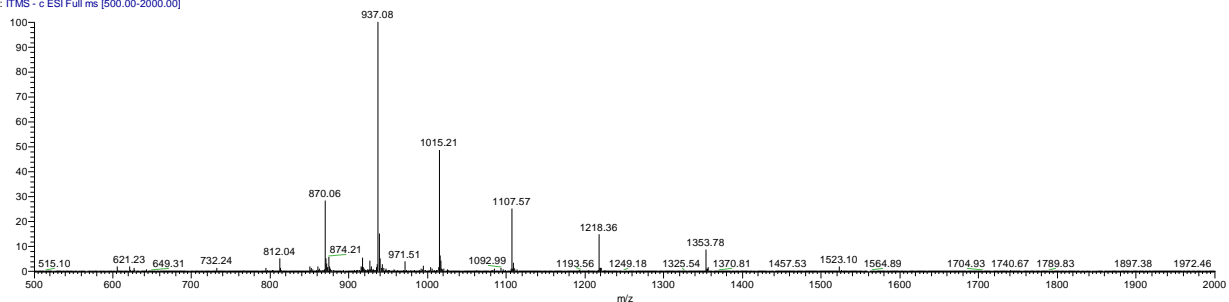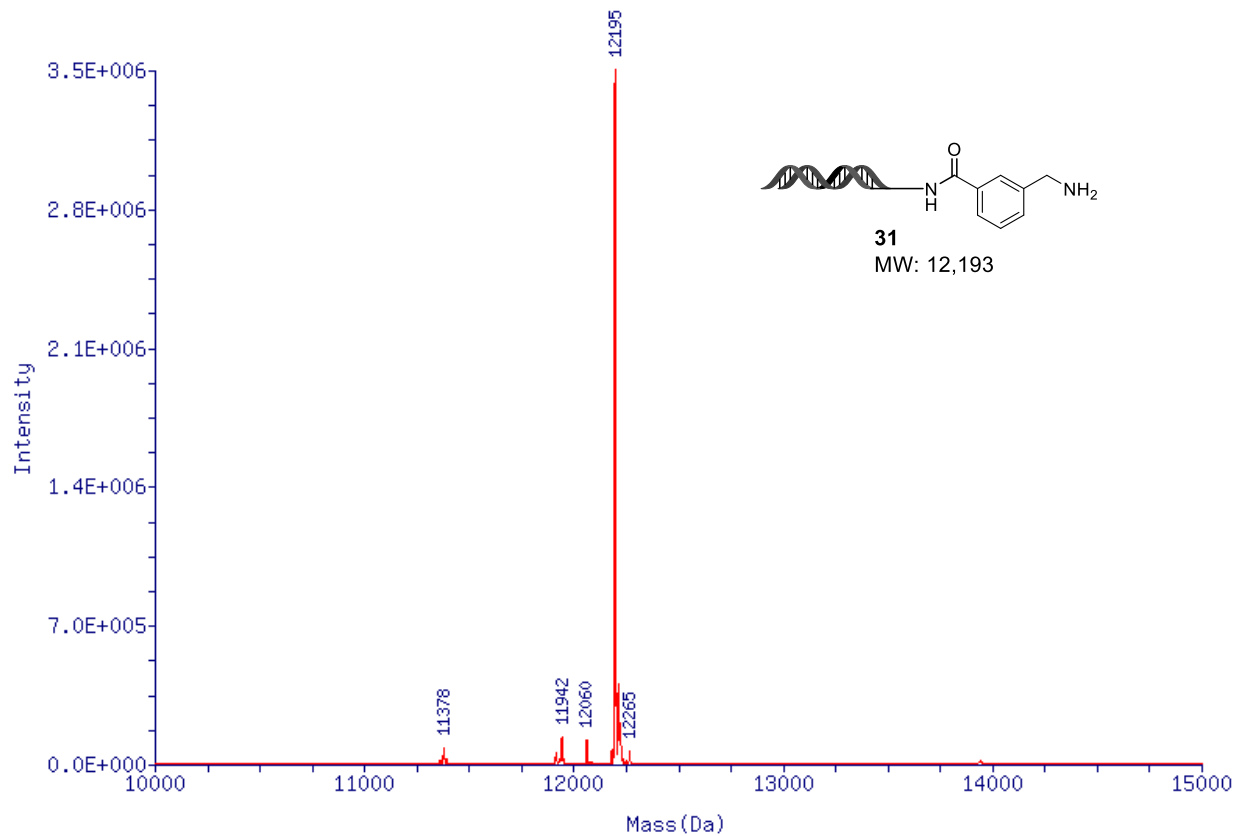

RT: 0.00 - 2.00 SM: 7B

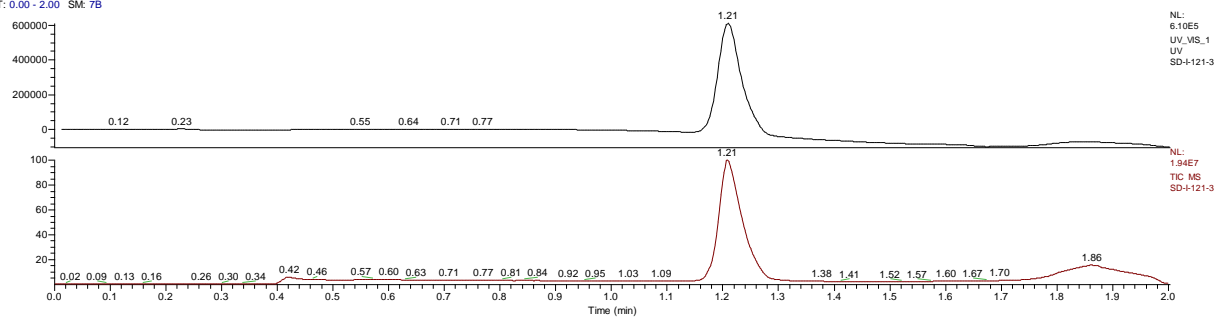

SD-I121-3 #407-461 RT: 1.15-1.29 AV: 55 NL: 1.56E6  
T: ITMS - c ESI Full ms [500.00-2000.00]

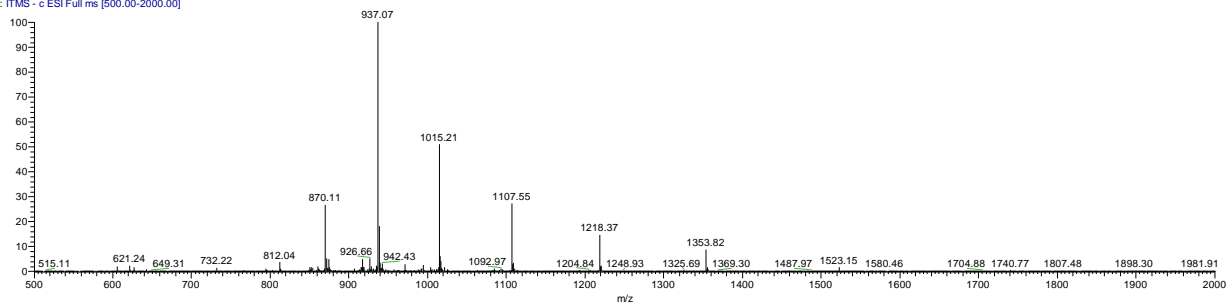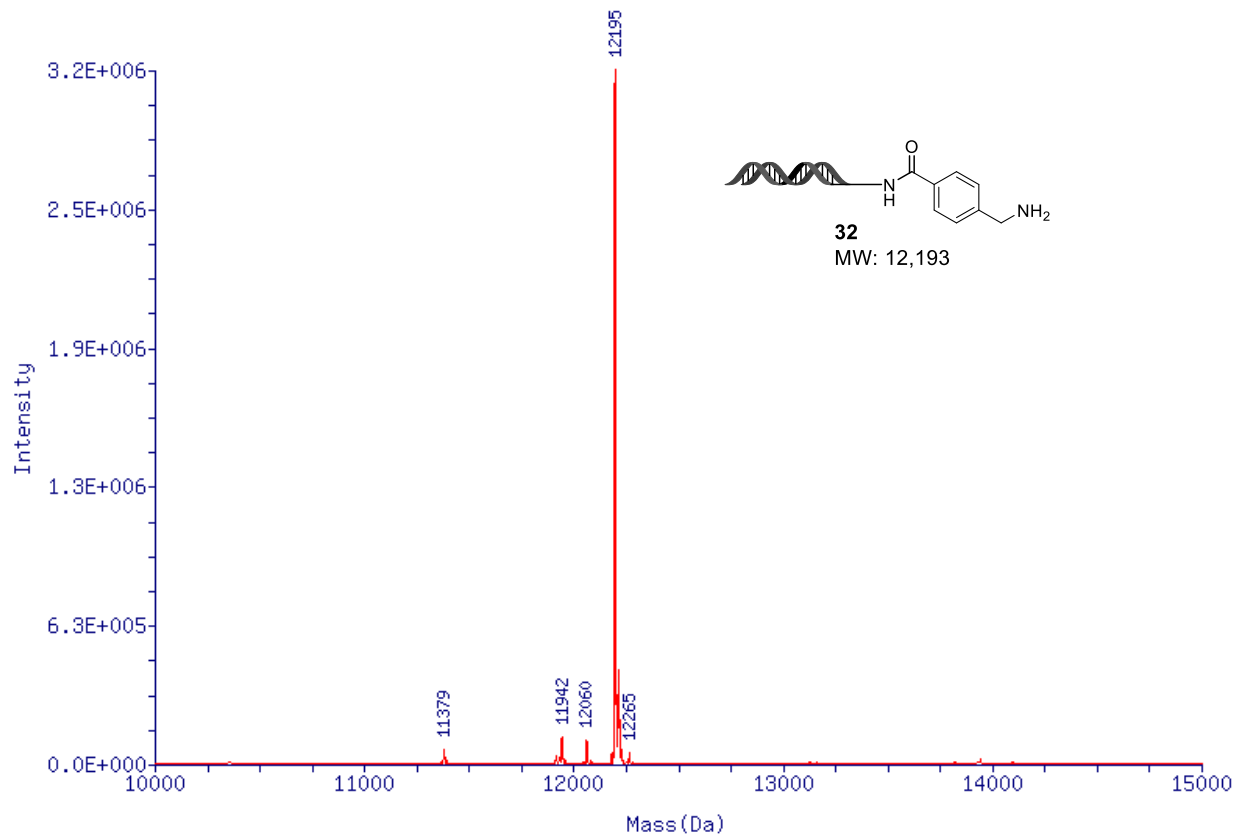



RT: 0.00 - 2.00 SM: 7B

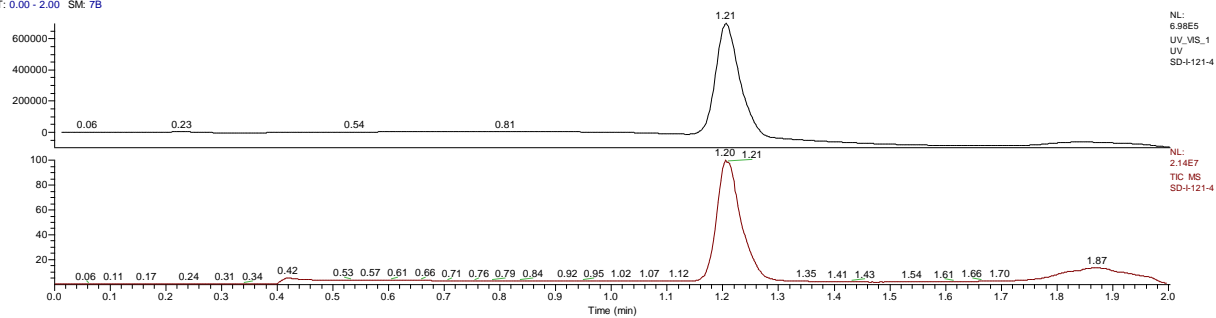

SD-I121-4 #410-460 RT: 1.16-1.29 AV: 51 NL: 1.89E6  
T: ITMS - c ESI Full ms [500.00-2000.00]

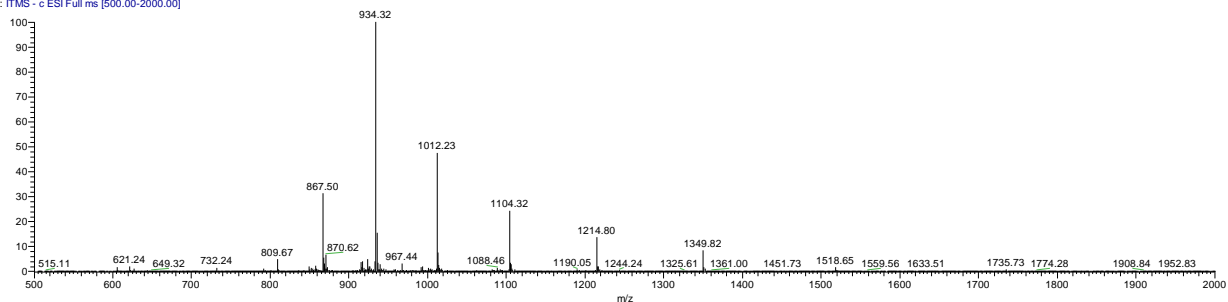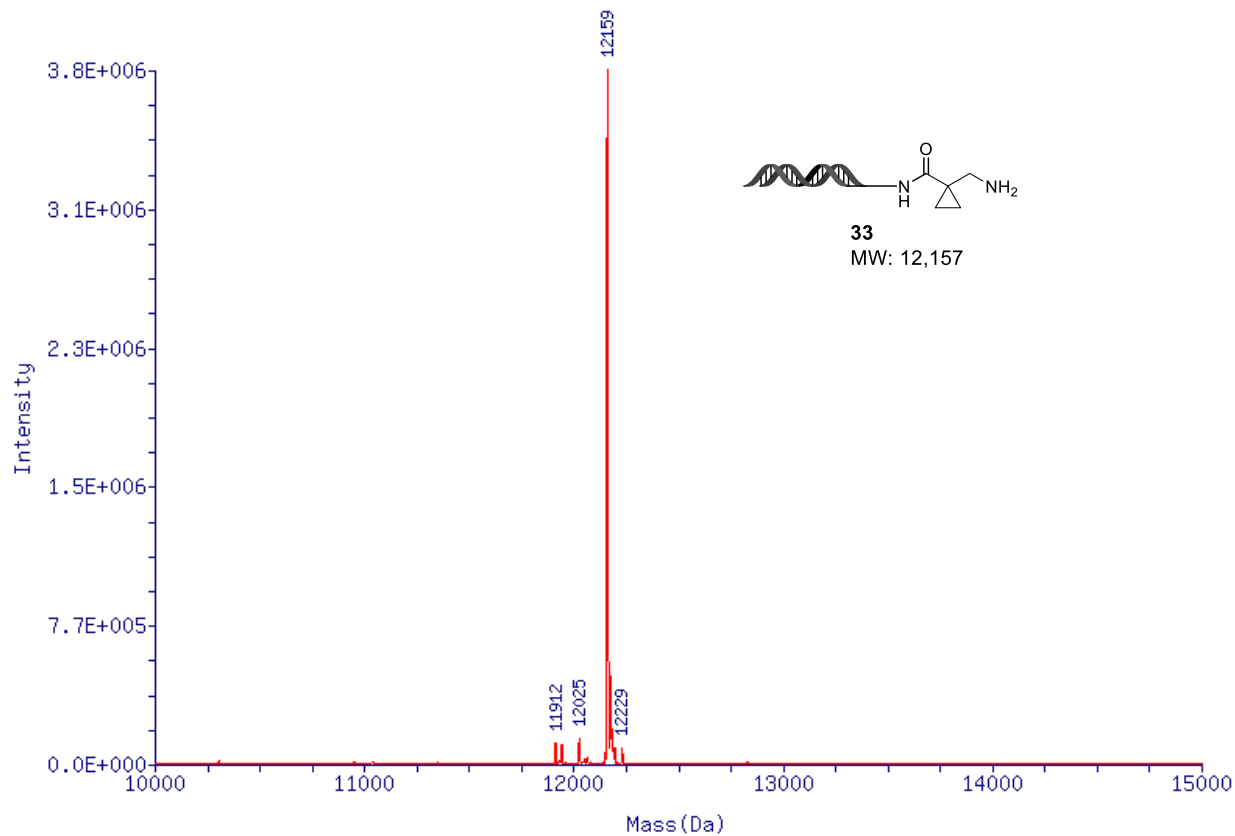

RT: 0.00 - 2.00 SM: 7B

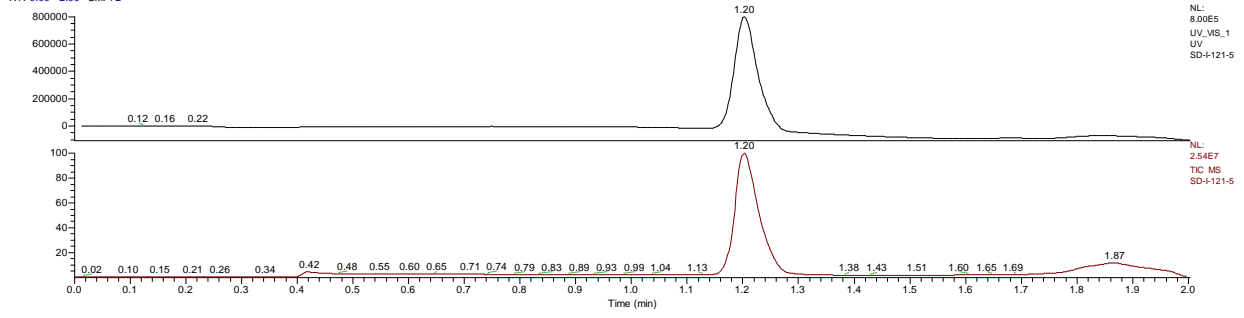

SD-I121-5 #409-466 RT: 1.15-1.30 AV: 58 NL: 1.89E6  
T: FTMS - c ESI Full ms [500.00-2000.00]

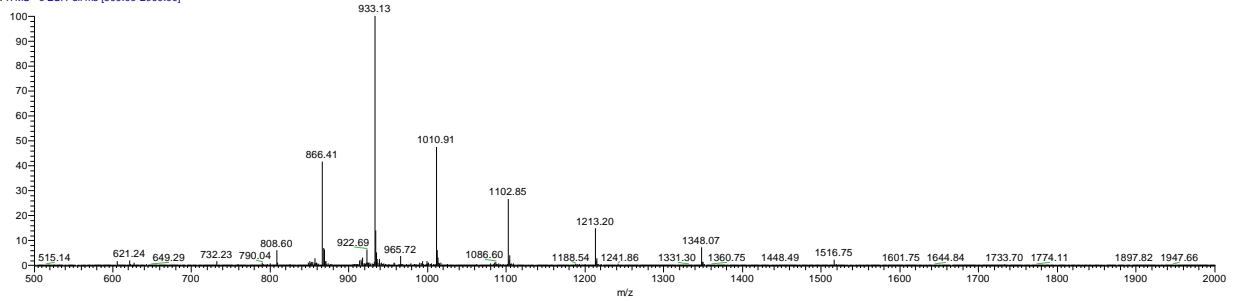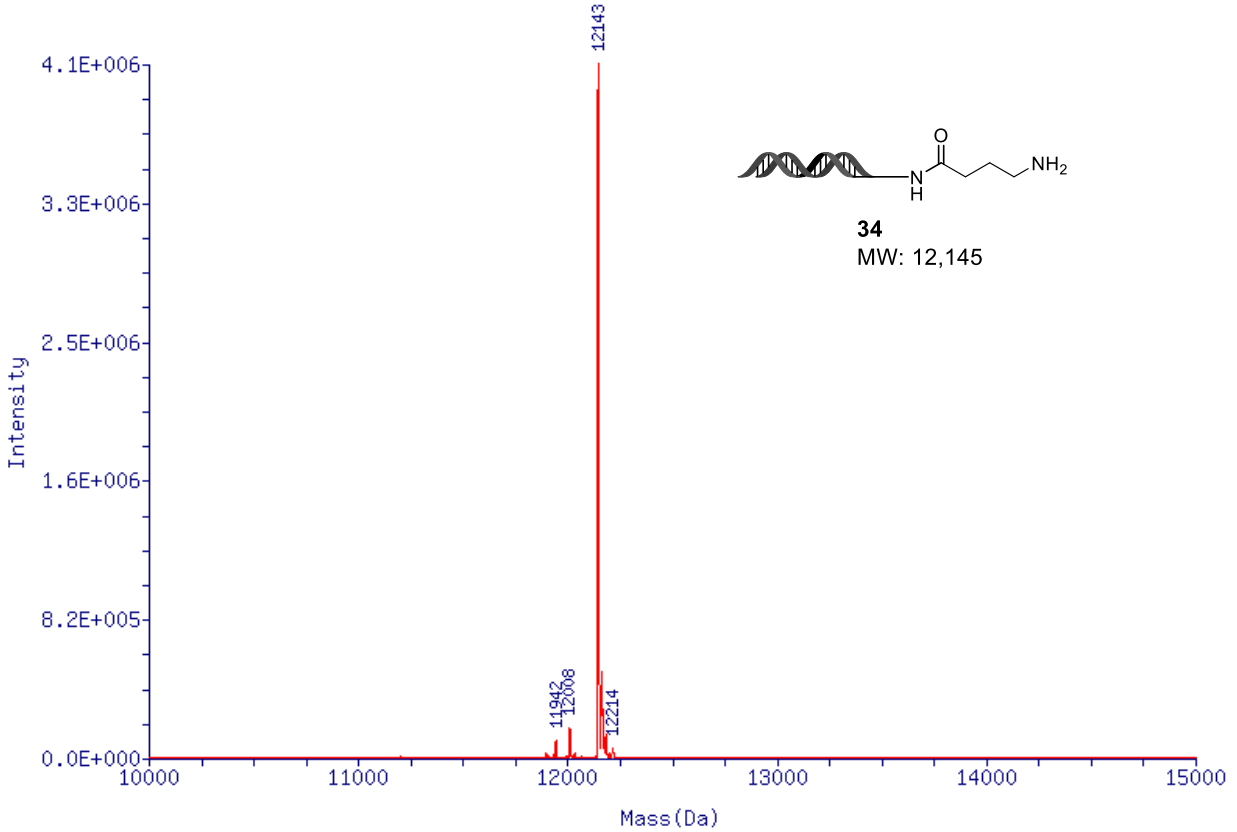

RT: 0.00 - 2.00 SM: 7B

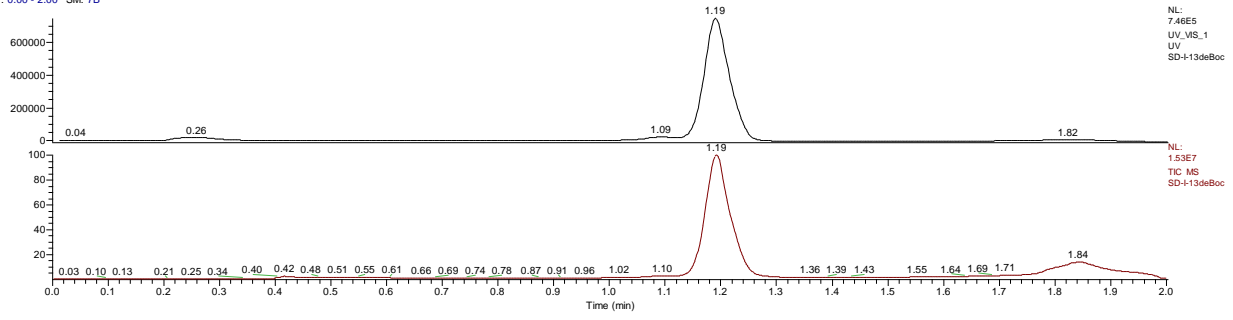

SD-I13deBoc #401-457 RT: 1.13-1.28 AV: 57 NL: 9.29E5  
T: ITMS - c ESI Full ms [500.00-2000.00]

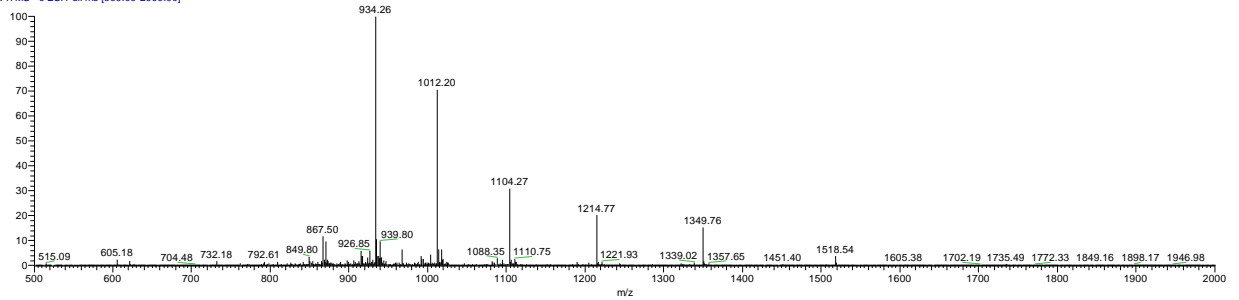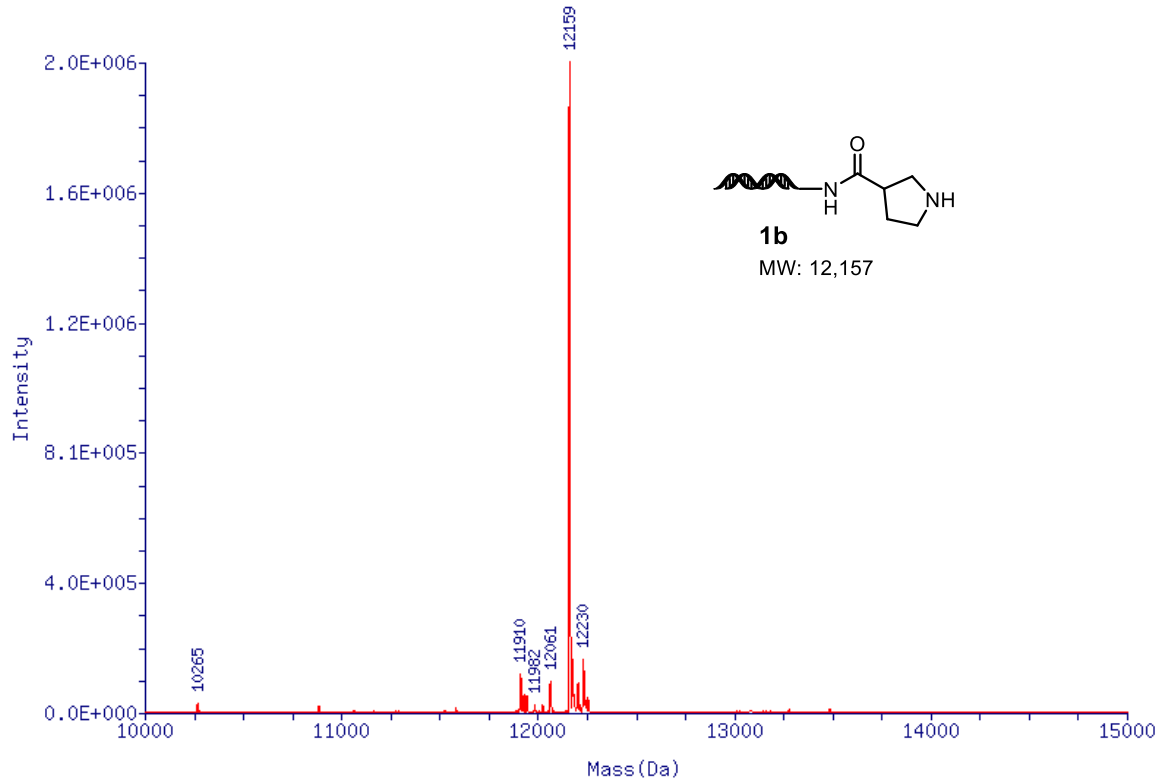

RT: 0.00 - 2.00 SM: 7B

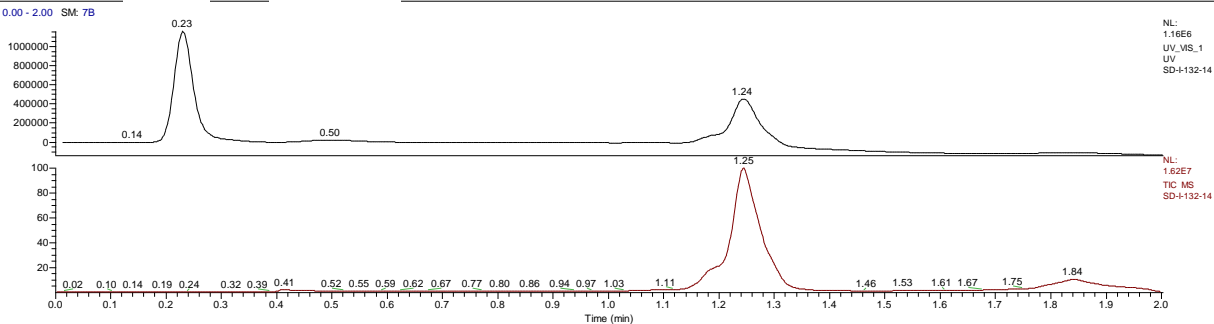

NL  
1.16E6  
UV\_VMS\_1  
UV  
SD-I-132-14

NL  
1.62E7  
TIC MS  
SD-I-132-14

SD-I-132-14 #410-475 RT: 1.16-1.33 AV: 66 NL: 9.98E5  
T: ITMS - c ESI Full ms [500.00-2000.00]

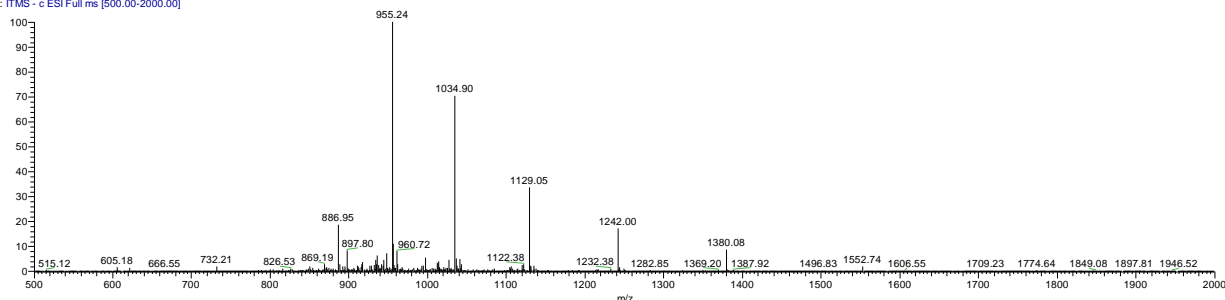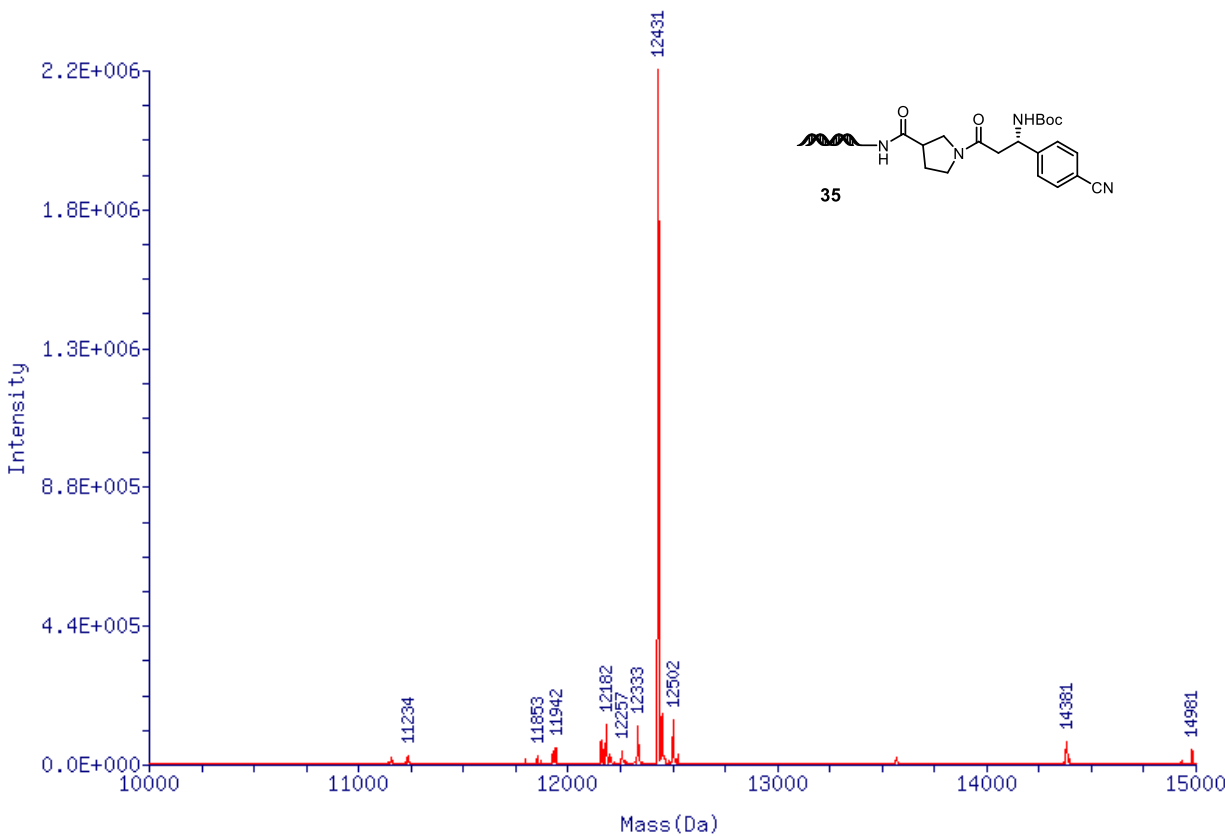

RT: 0.00 - 2.00 SM: 7B

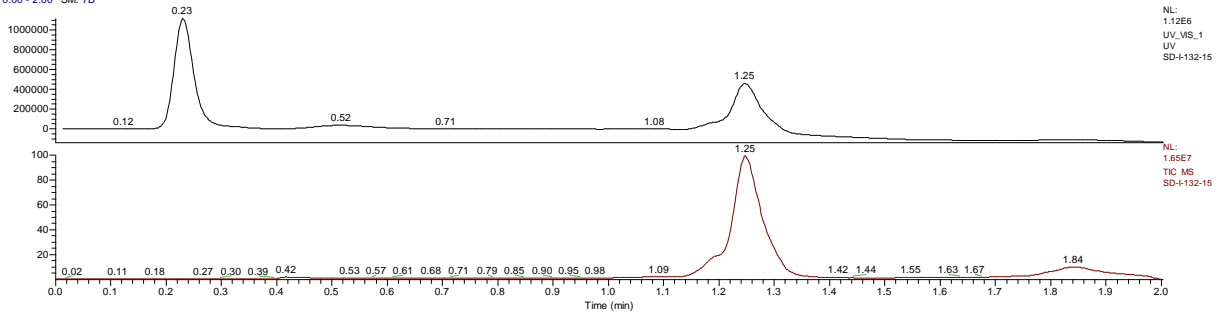

SD-I-132-15 #409-474 RT: 1.15-1.33 AV: 66 NL: 1.04E6  
T: ITMS - c ESI Full ms [500.00-2000.00]

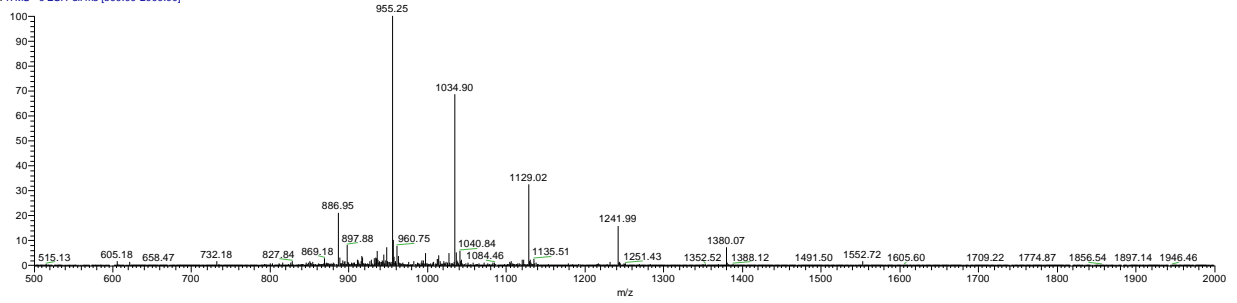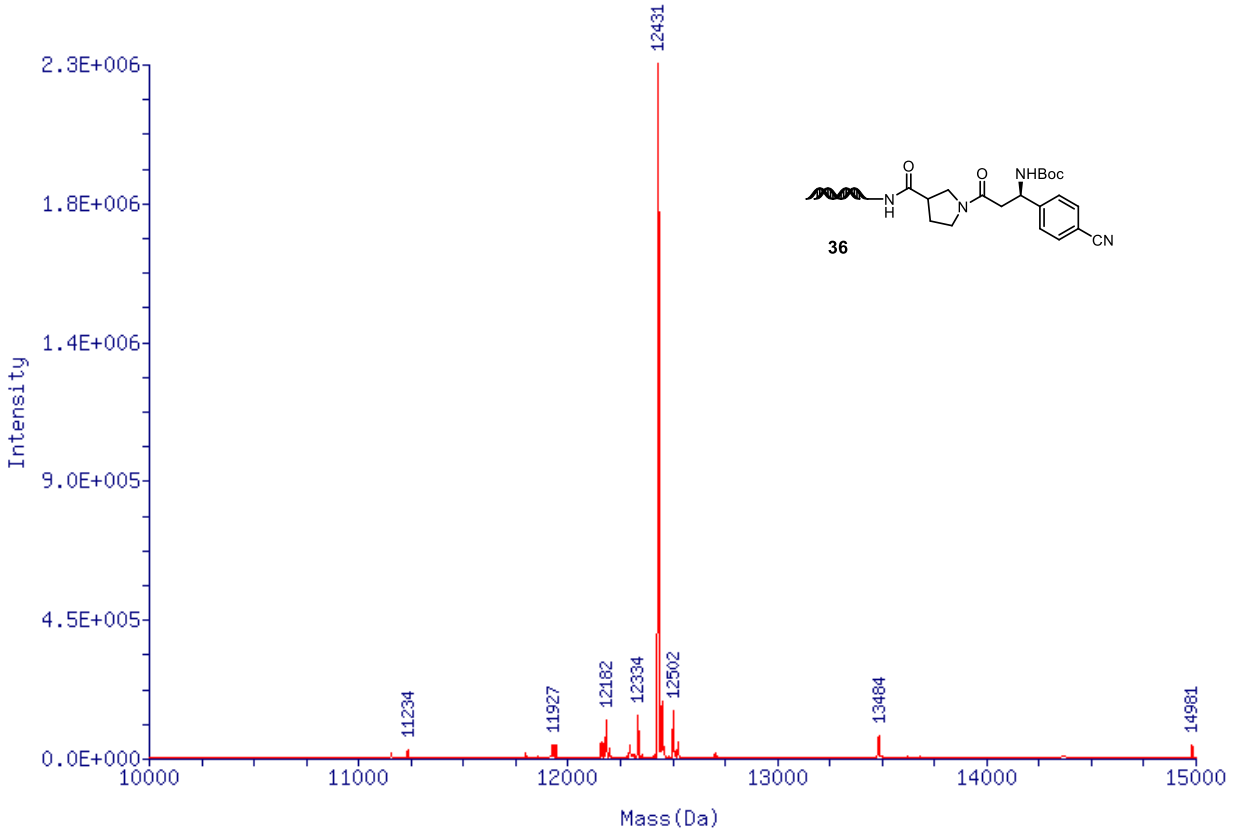

RT: 0.00 - 2.00 SM: 7B

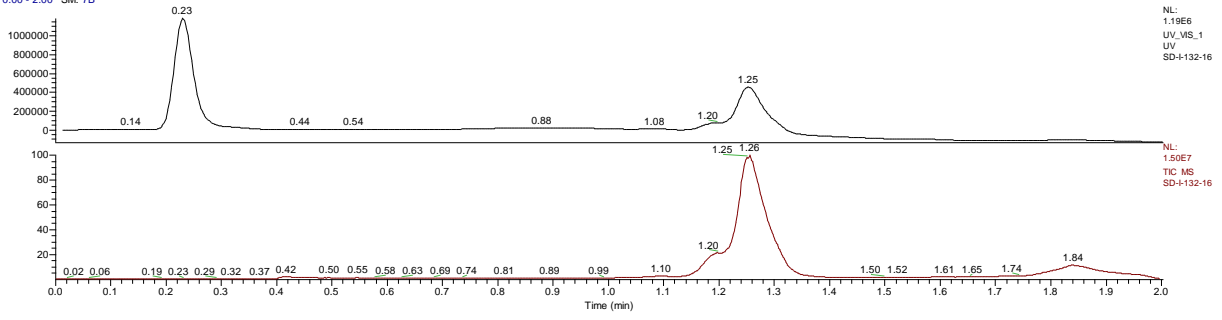

SD-I-132-16 #409-479 RT: 1.15-1.34 AV: 71 NL: 9.29E5  
T: ITMS - c ESI Full ms [500.00-2000.00]

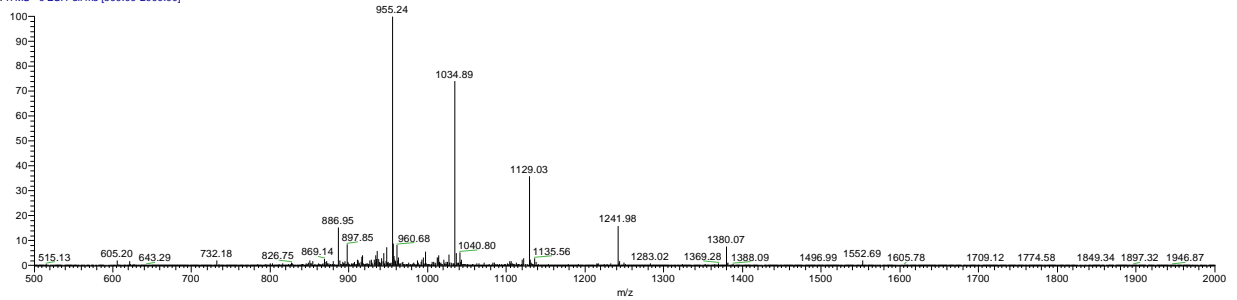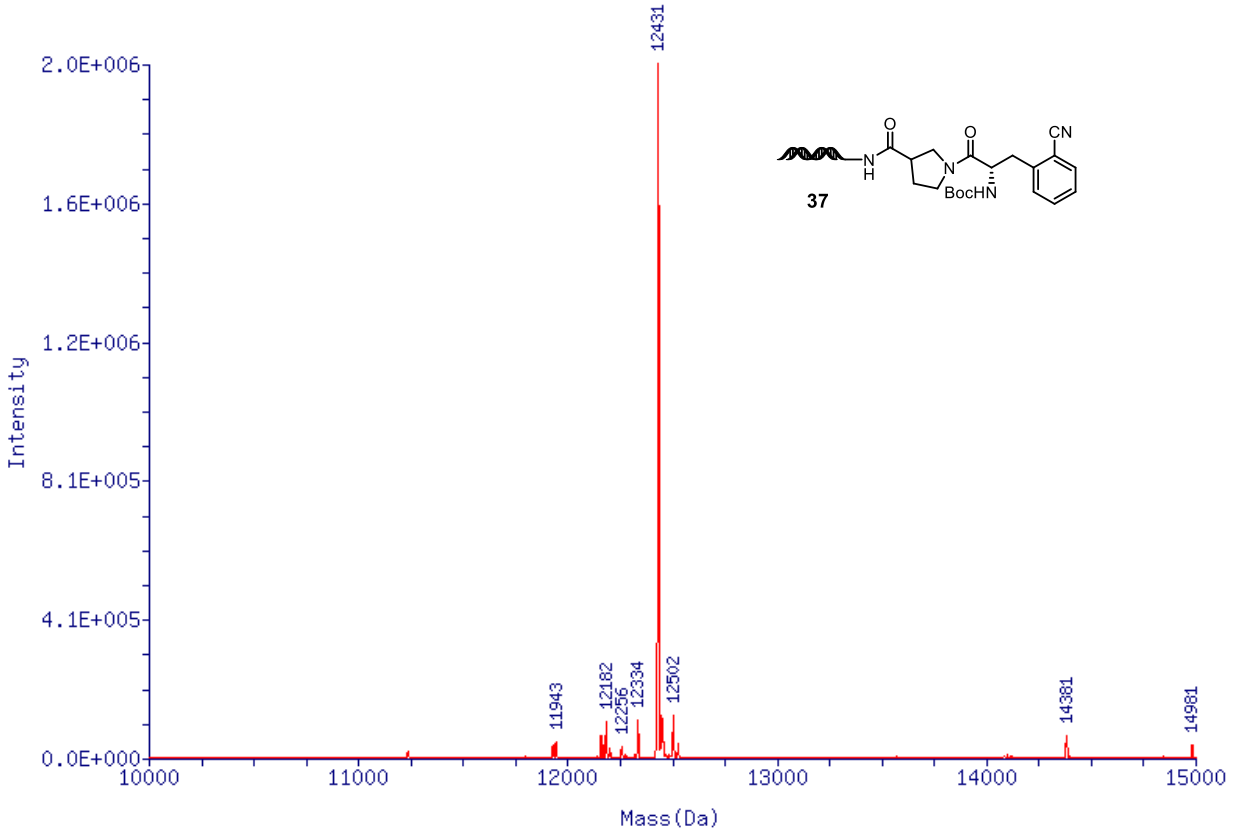

RT: 0.00 - 2.00 SM: 7B

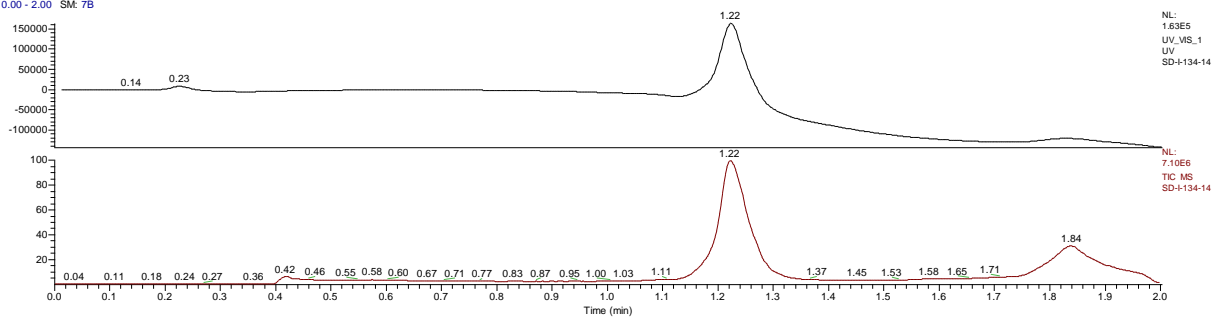

SD-I-134-14 #402-471 RT: 1.13-1.32 AV: 70 NL: 2.74E5  
T: ITMS - c ESI Full ms [500.00-2000.00]

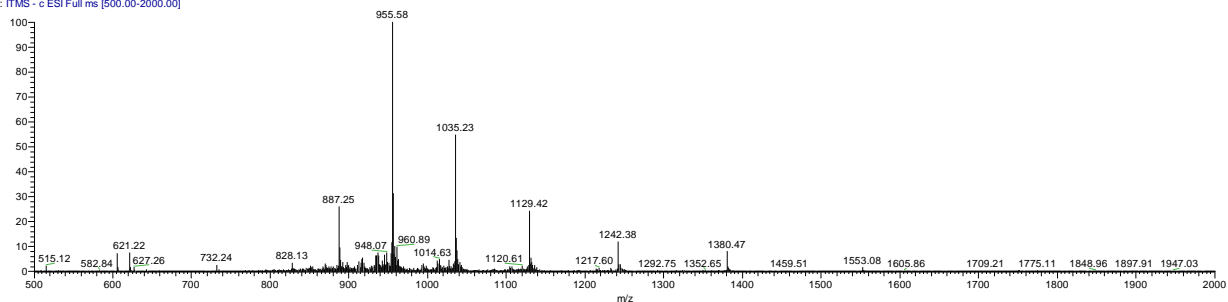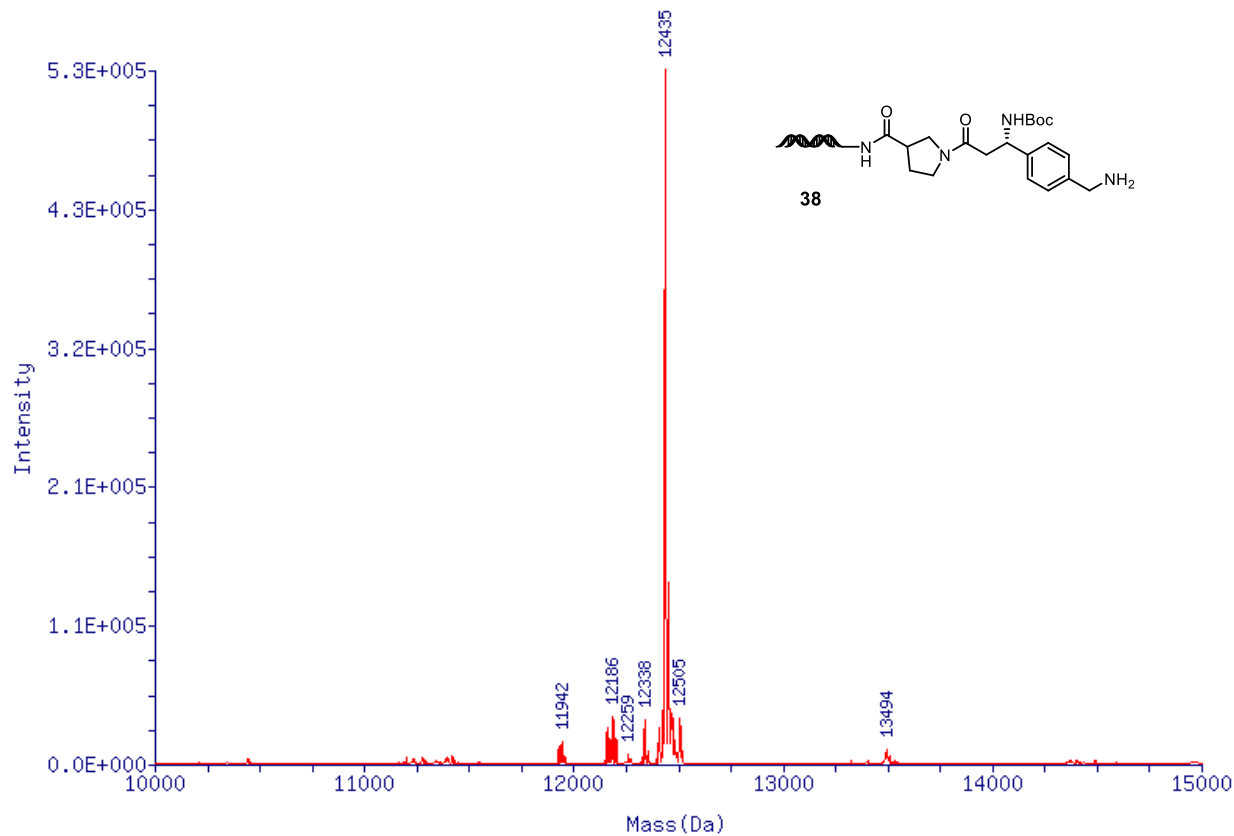

RT: 0.00 - 2.00 SM: 7B

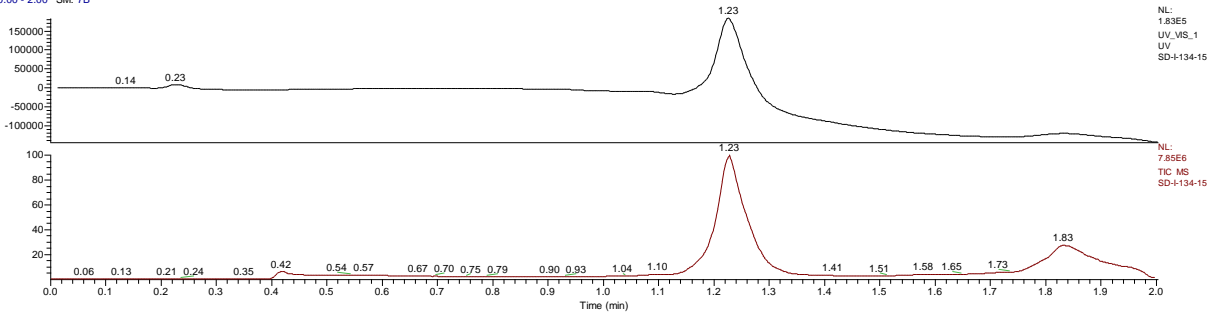

SD-I-134-15 #407-470 RT: 1.15-1.32 AV: 64 NL: 3.09E5  
T: ITMS - c ESI Full ms [500.00-2000.00]

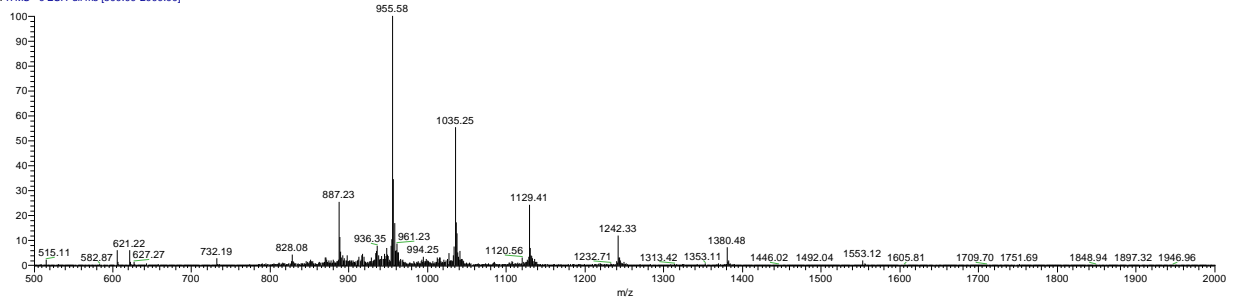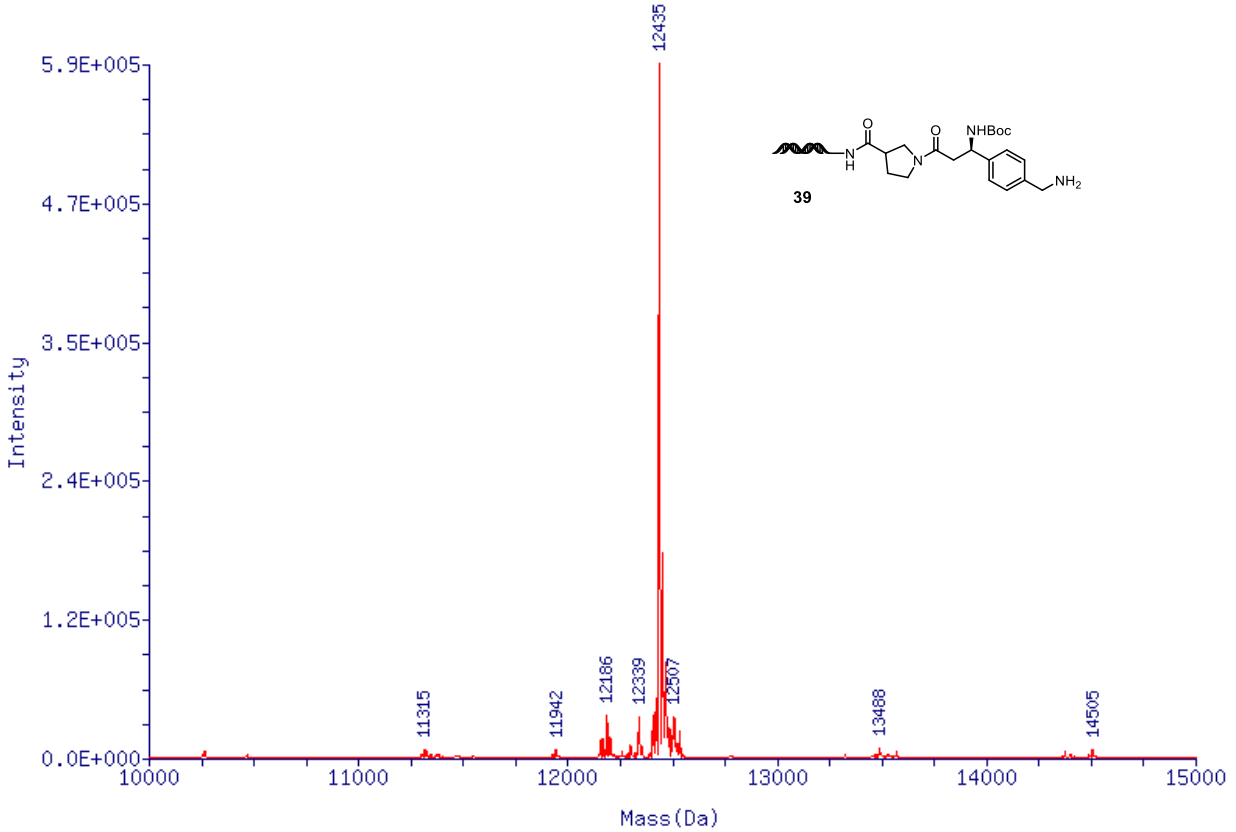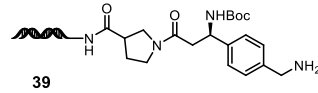



RT: 0.00 - 2.00 SM: 7B

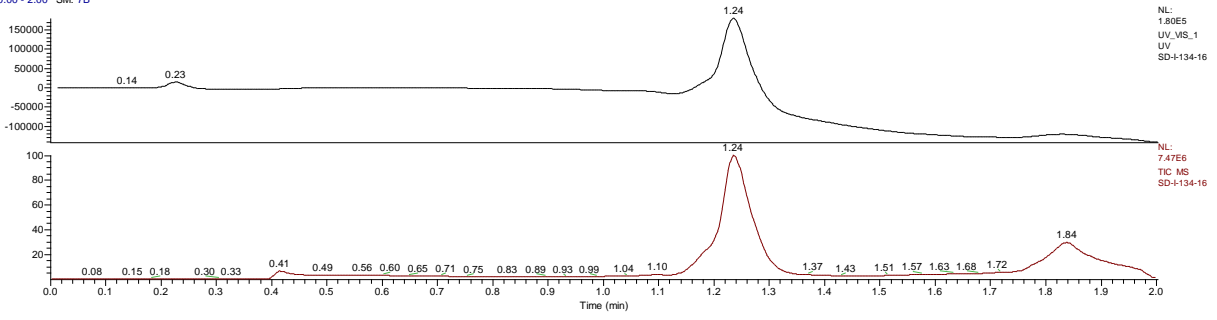

SD-I-134-16 #404-479 RT: 1.14-1.34 AV: 76 NL: 3.47E5  
T: ITMS - c ESI Full ms [500.00-2000.00]

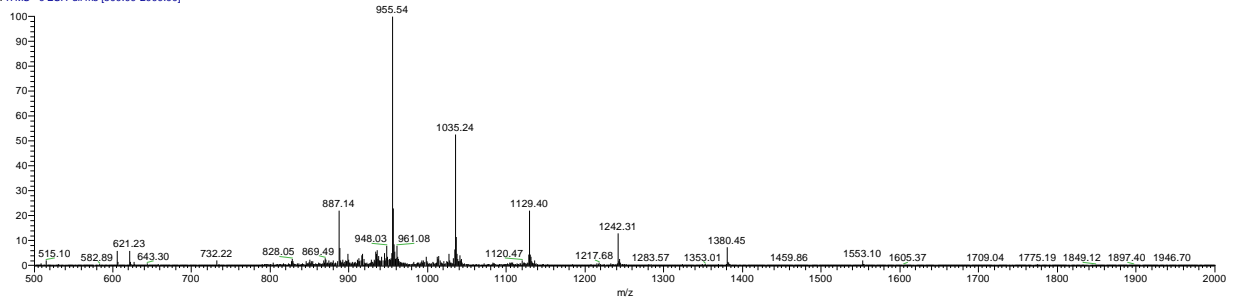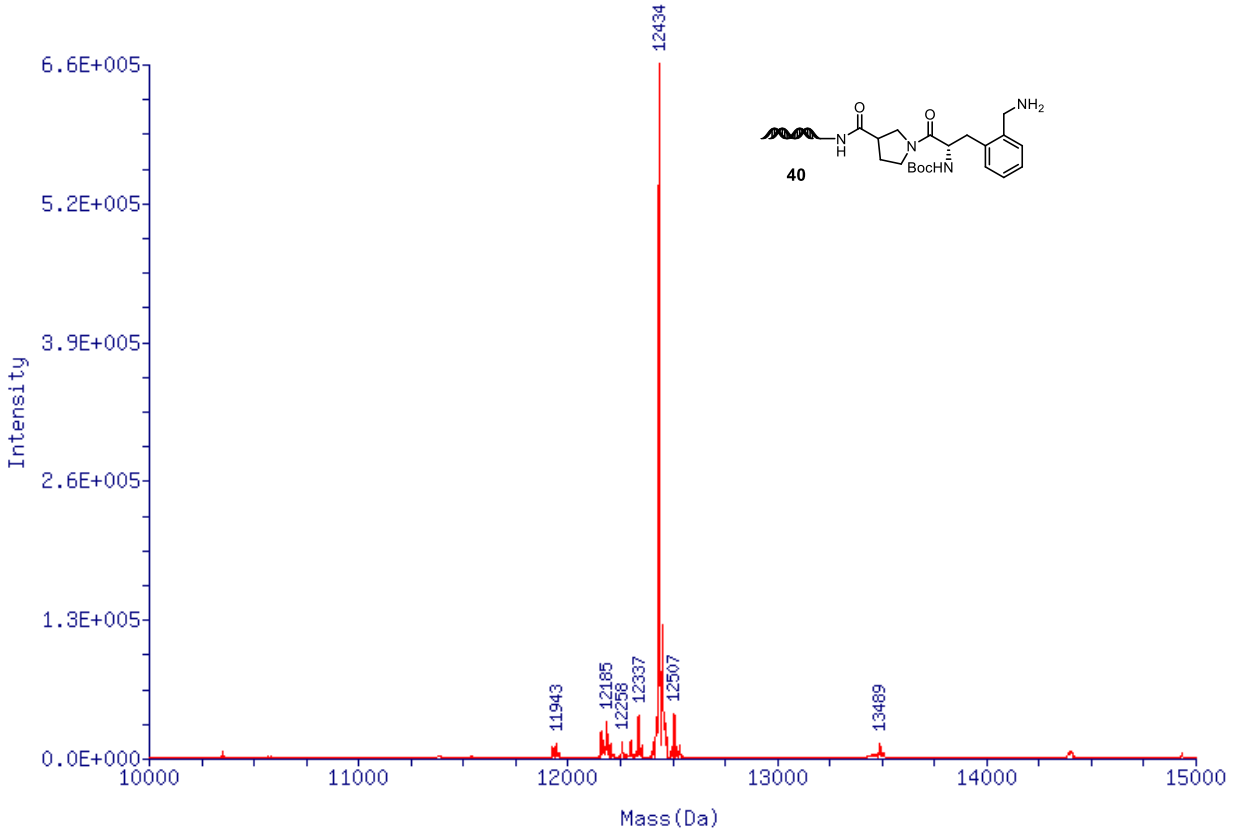

RT: 0.00 - 2.00 SM: 7B

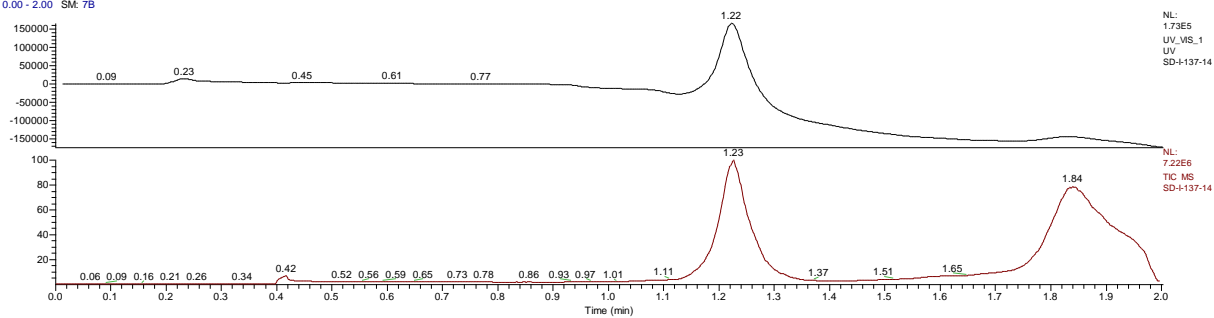

SD-I-137-14 #400-474 RT: 1.13-1.33 AV: 75 NL: 2.39E5  
T: FTMS - c ESI Full ms [500.00-2000.00]

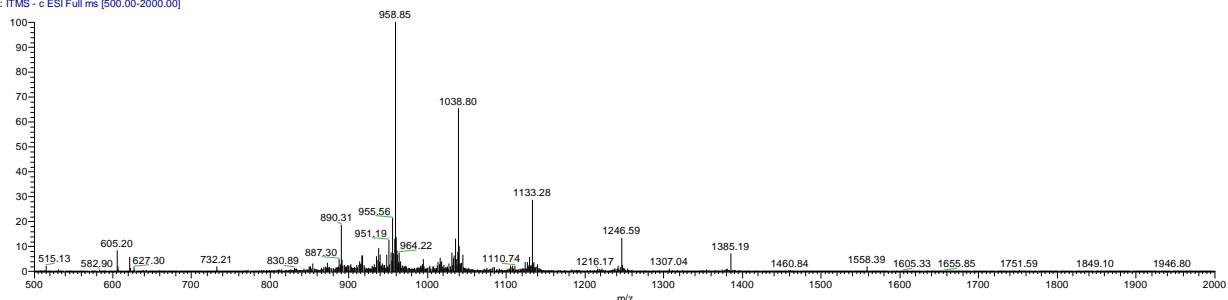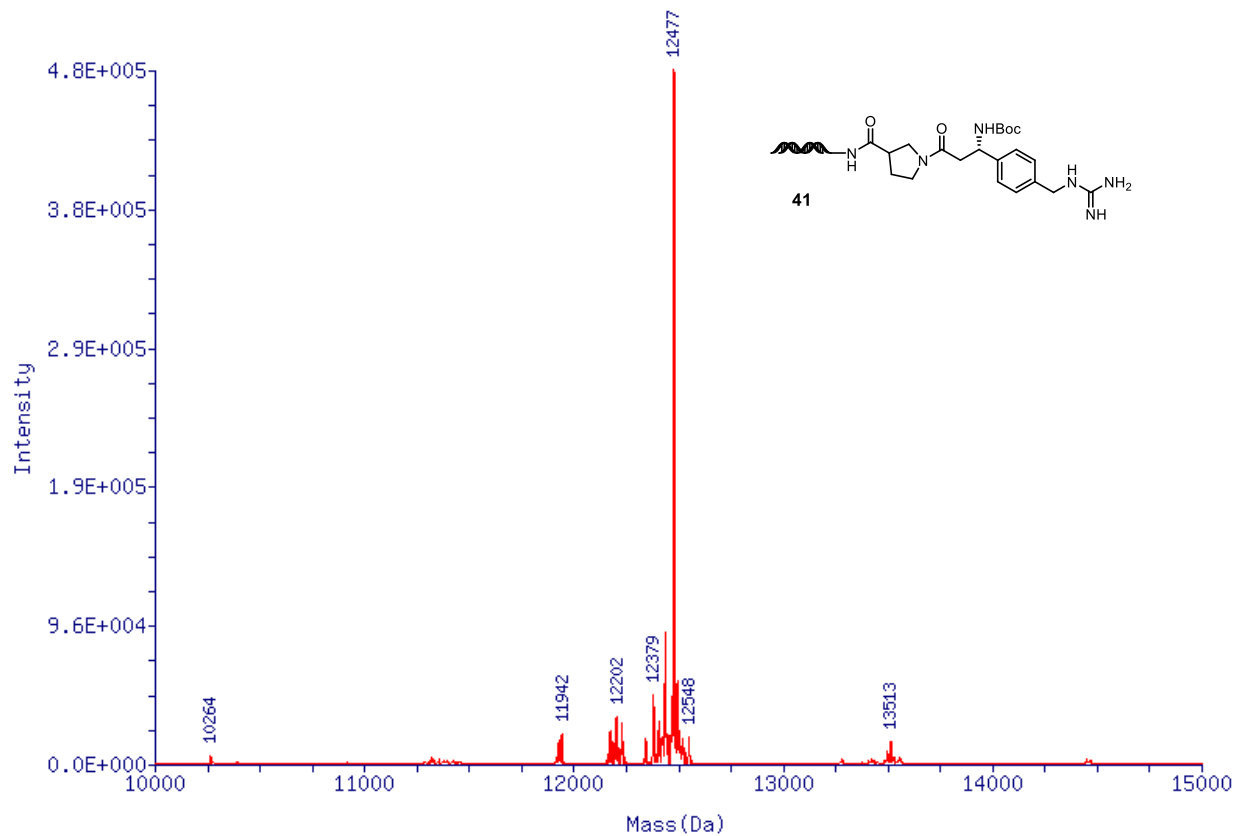

C:\Analytical\...8242018\SD

0:37

RT: 0.00 - 2.00 SM: 7B

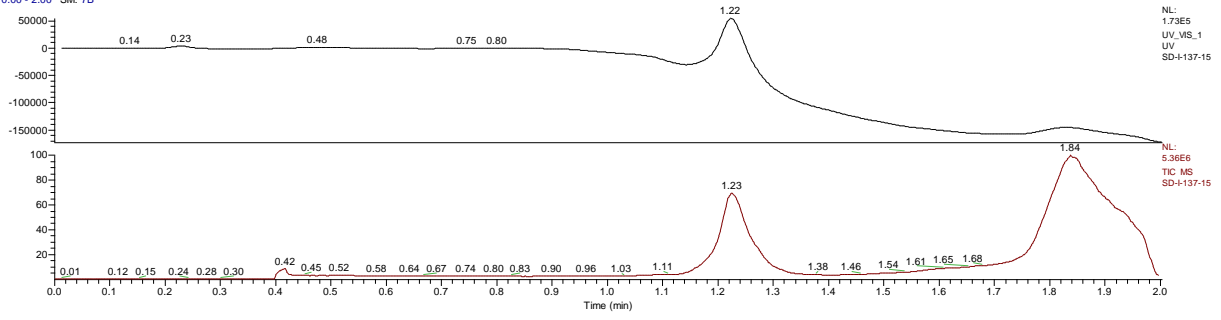

SD-I-137-15 #406-469 RT: 1.15-1.32 AV: 64 NL: 1.32E5  
T: ITMS - c ESI Full ms [500.00-2000.00]

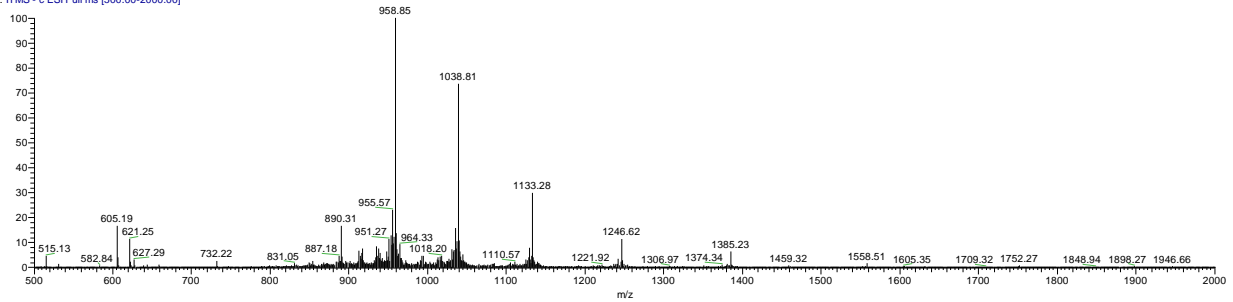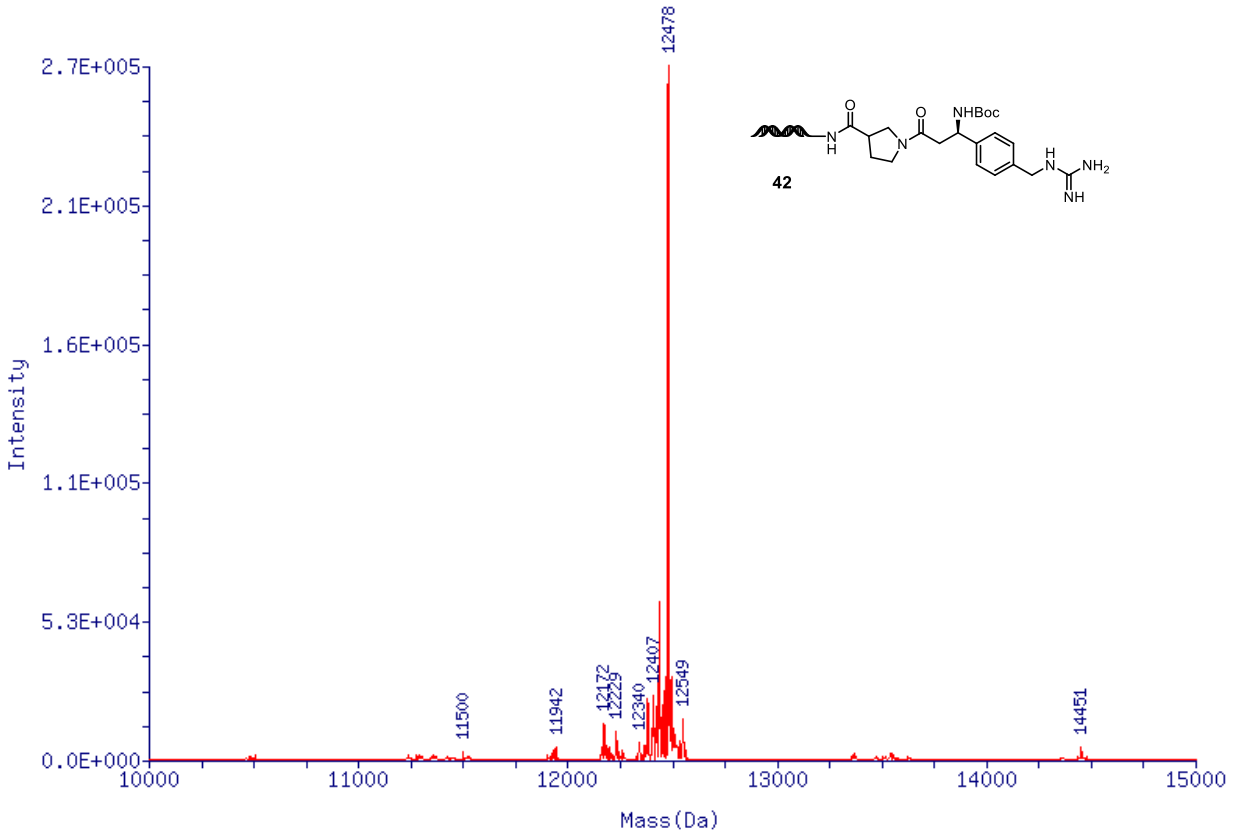

RT: 0.00 - 2.00 SM: 7B

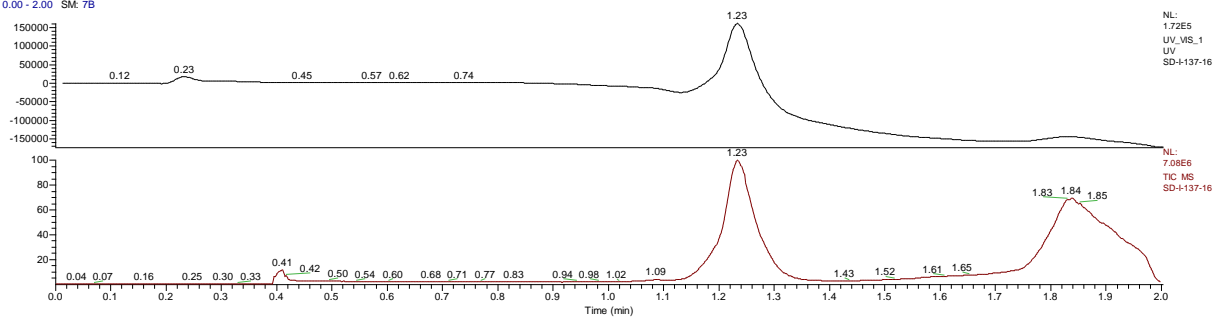

SD-I-137-16 #403-477 RT: 1.14-1.34 AV: 75 NL: 2.71E5  
T: ITMS - c ESI Full ms [500.00-2000.00]

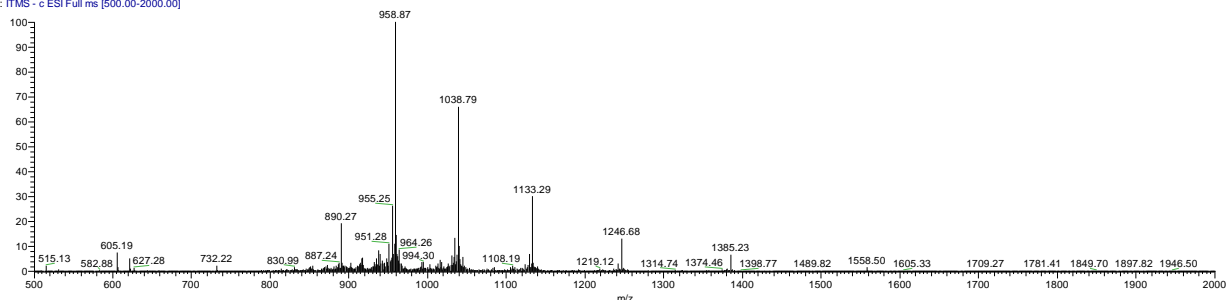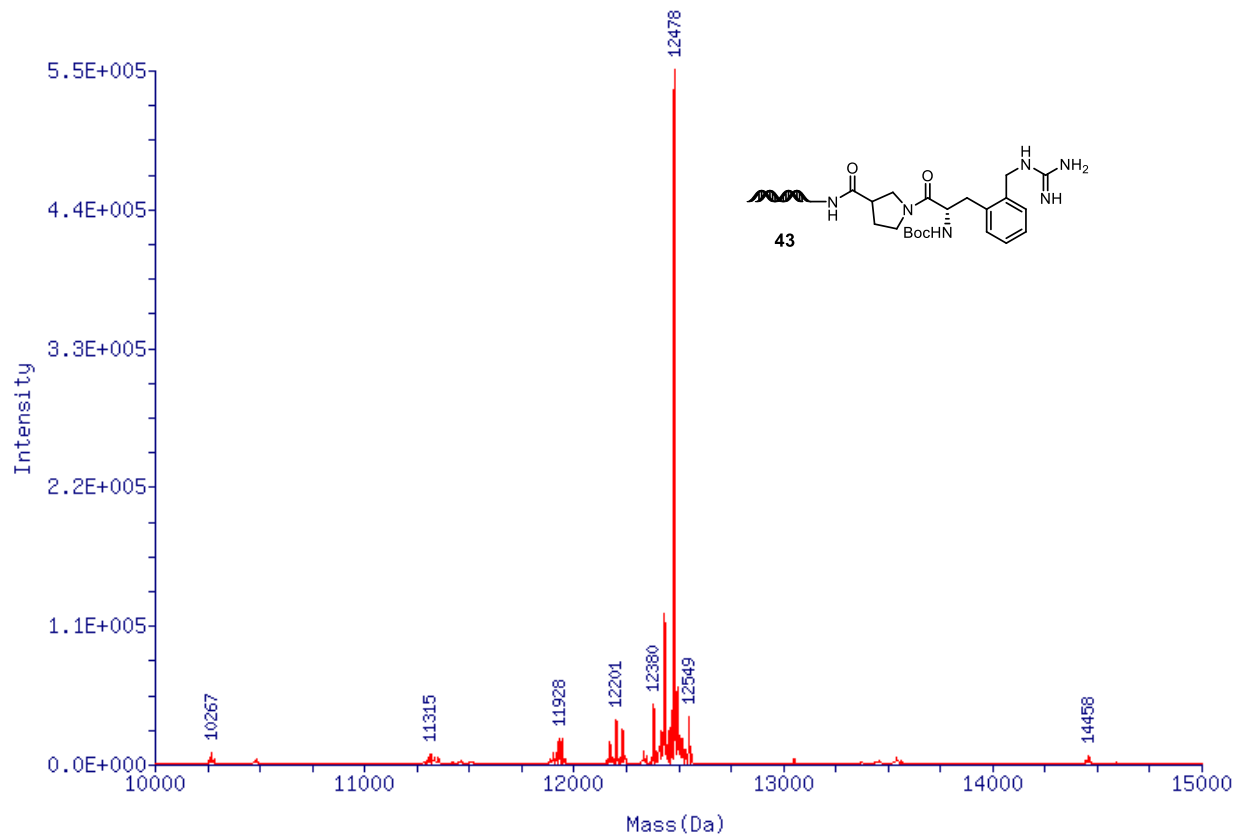

# 7d) Chemistry validation

C:\Analytical\...12072018\SI

2:19

RT: 0.00 - 2.00 SM: 7B

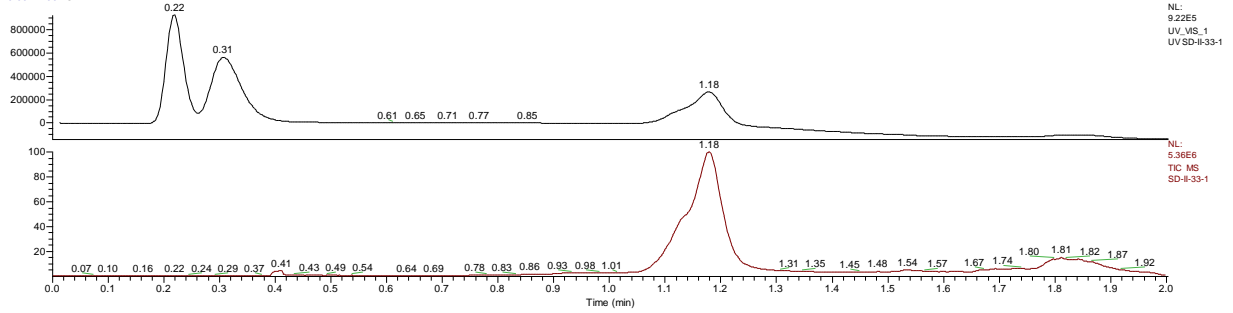

SD-II-33-1 #387-446 RT: 1.09-1.25 AV: 60 NL: 6.22E5  
T: FTMS - c ESI Full ms [500.00-2000.00]

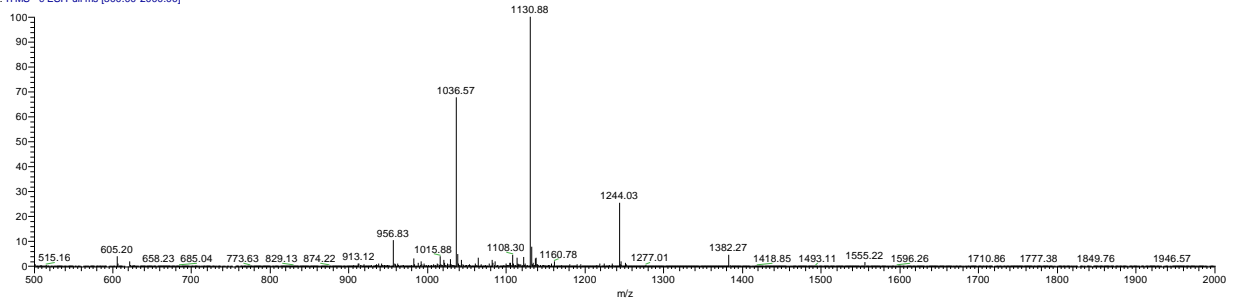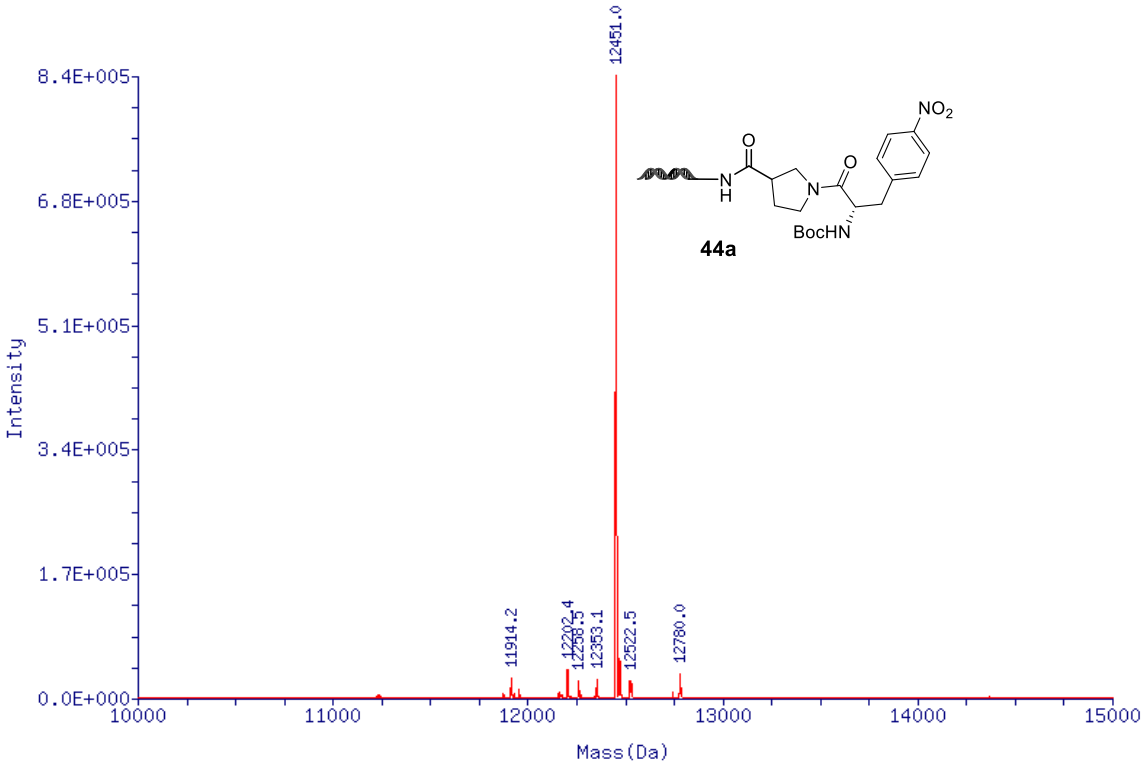

RT: 0.00 - 2.00 SM: 7B

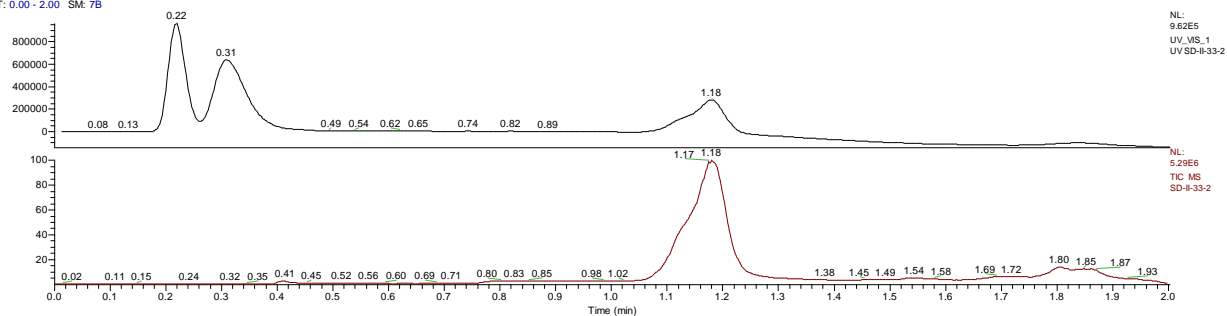

SD-II-33-2 #383-463 RT: 1.08-1.30 AV: 81 NL: 4.78E5  
T: FTMS - c ESI Full ms [500.00-2000.00]

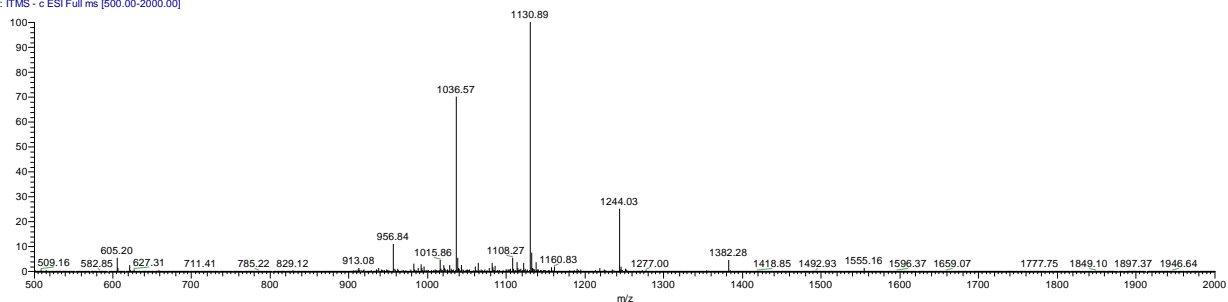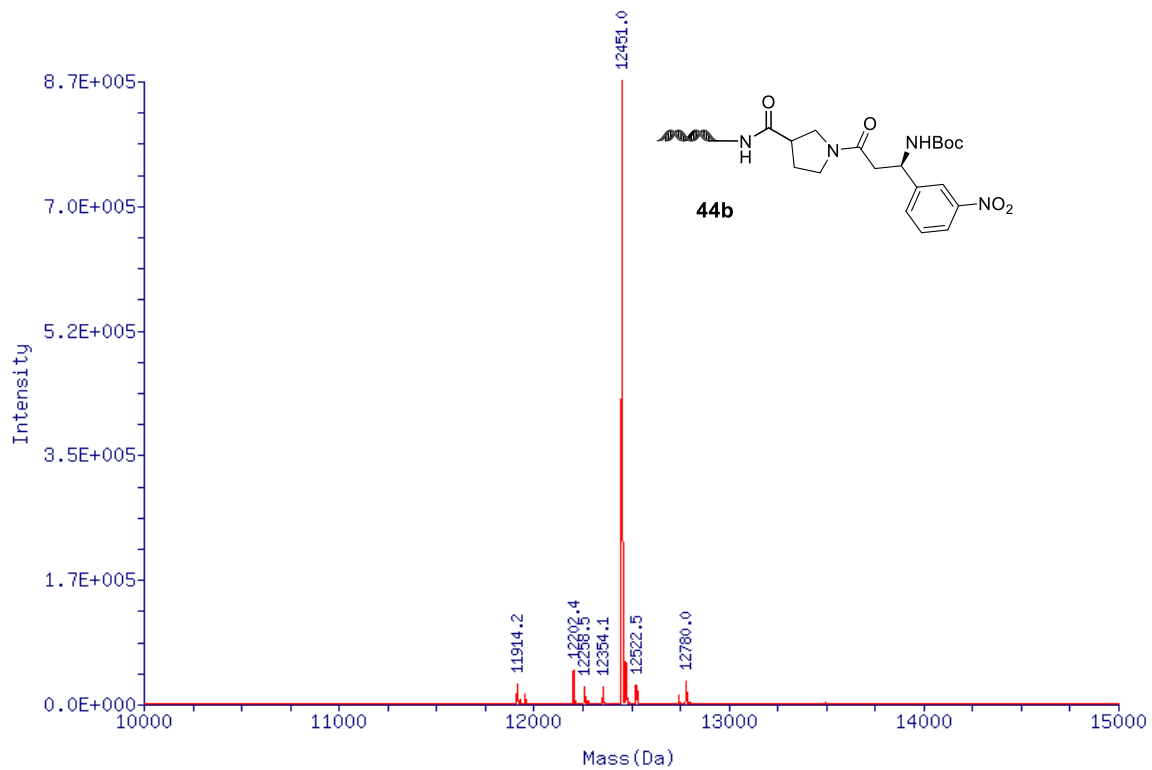

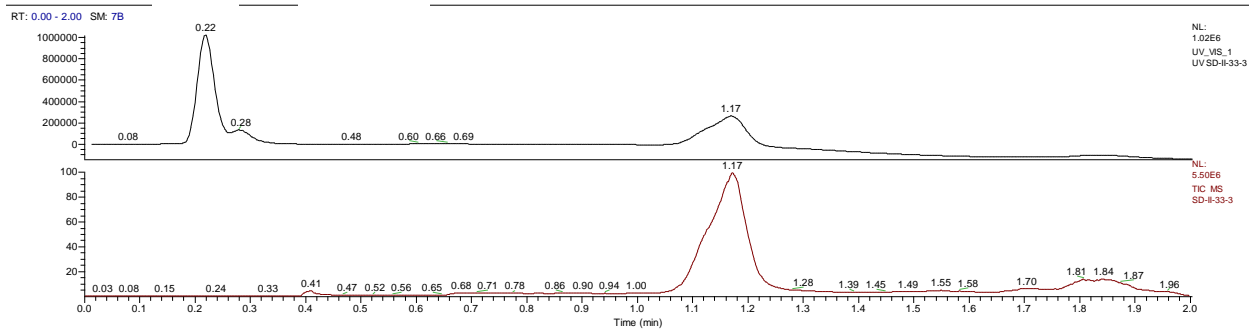

SD-II-33-3 #382-443 RT: 1.08-1.24 AV: 62 NL: 6.41E5  
T: FTMS - c ESI Full ms [500.00-2000.00]

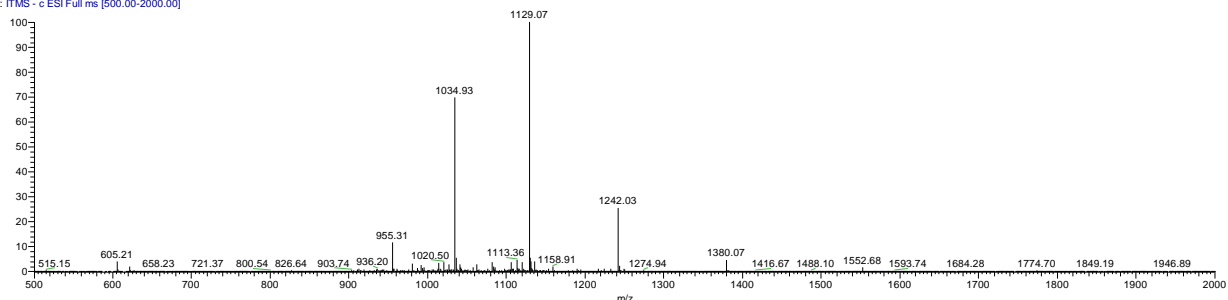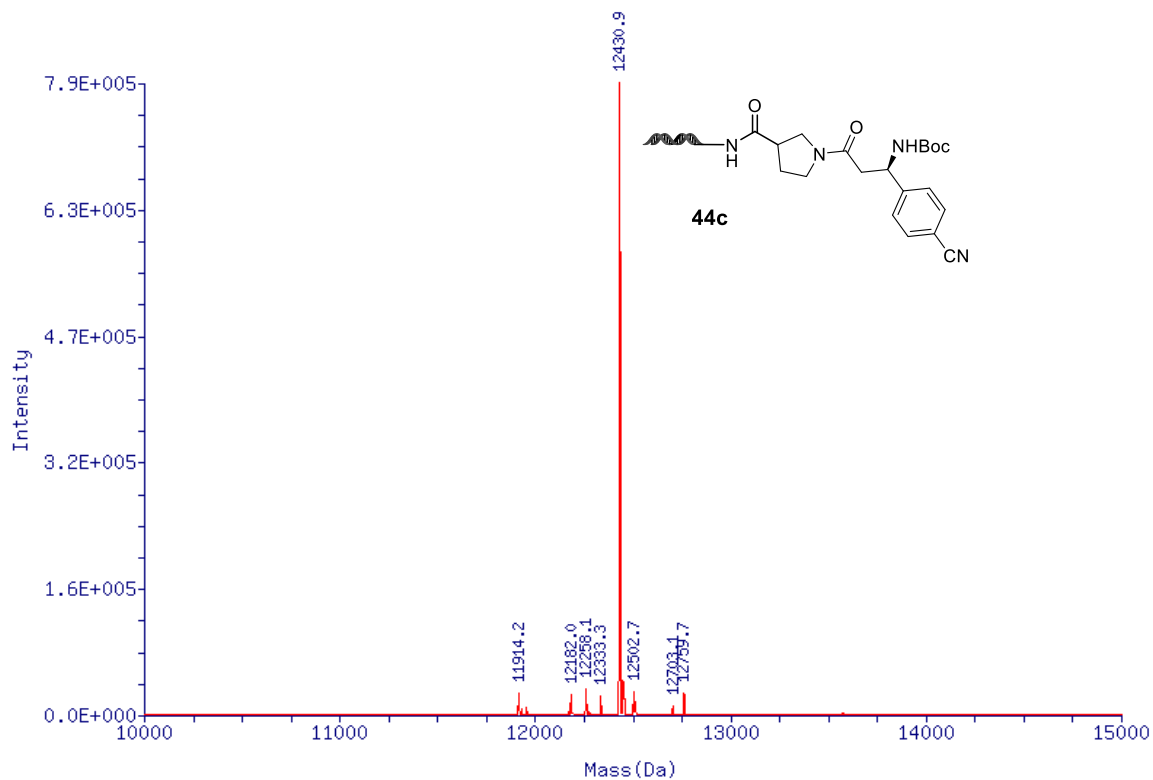

RT: 0.00 - 2.00 SM: 7B

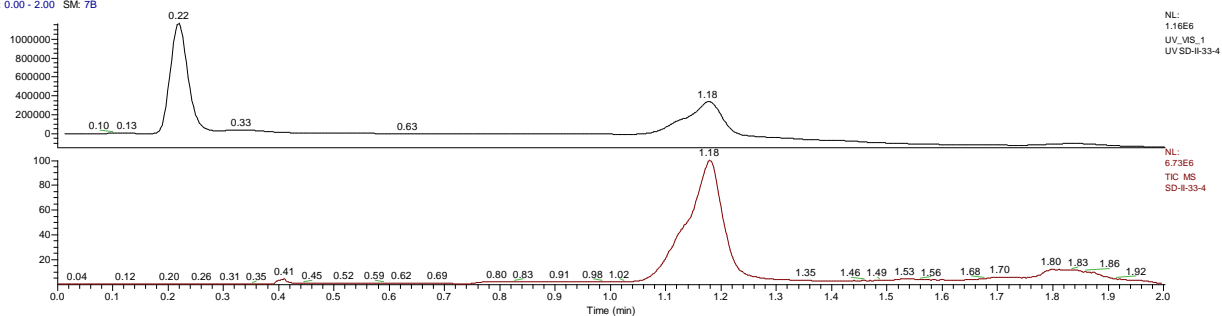

SD-II-33-4 #384-451 RT: 1.08-1.26 AV: 68 NL: 6.67E5  
T: FTMS - c ESI Full ms [500.00-2000.00]

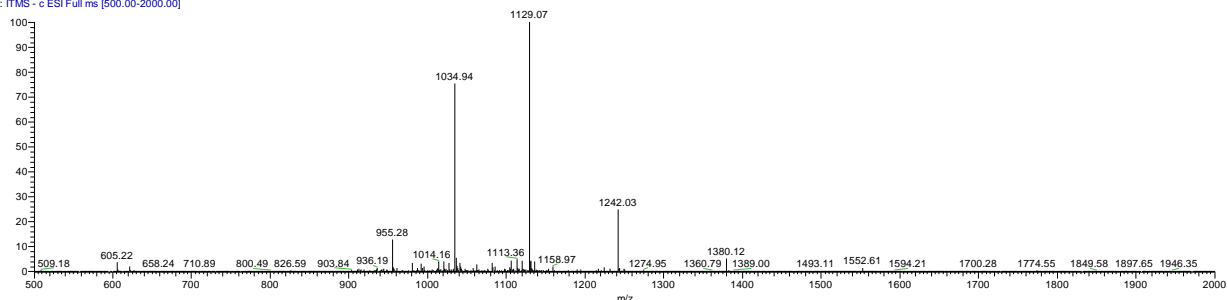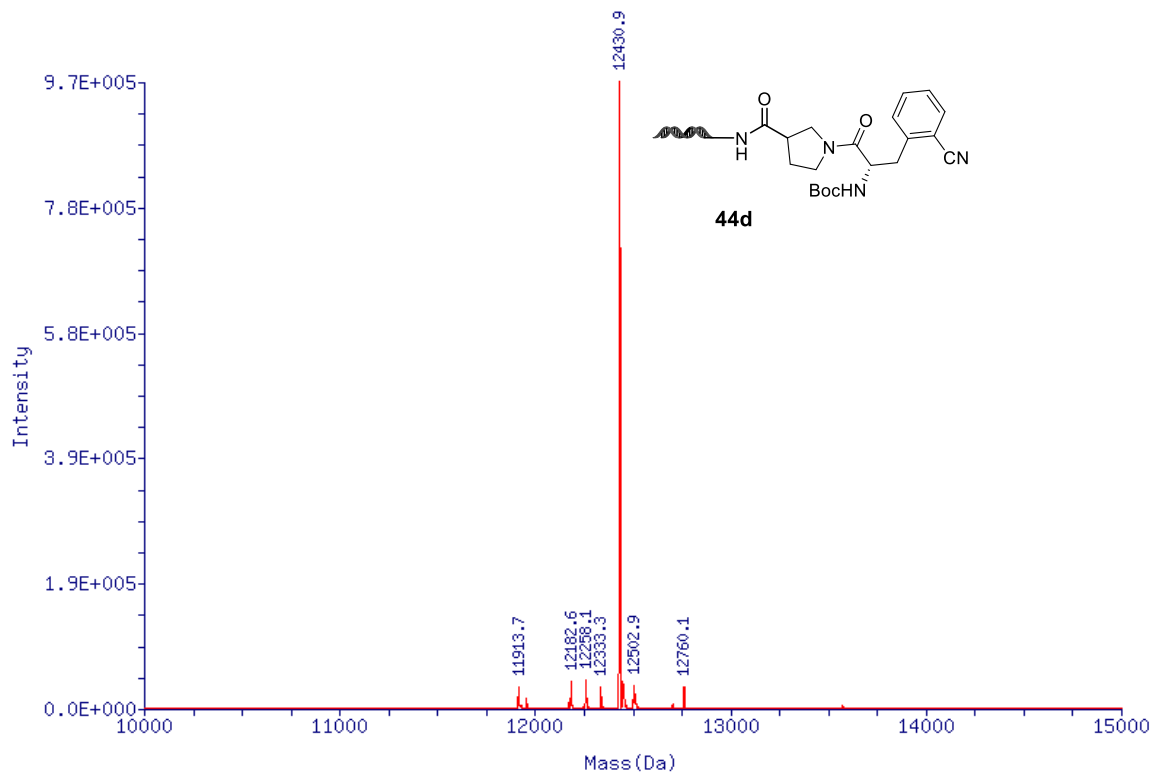



RT: 0.00 - 2.00 SM: 7B

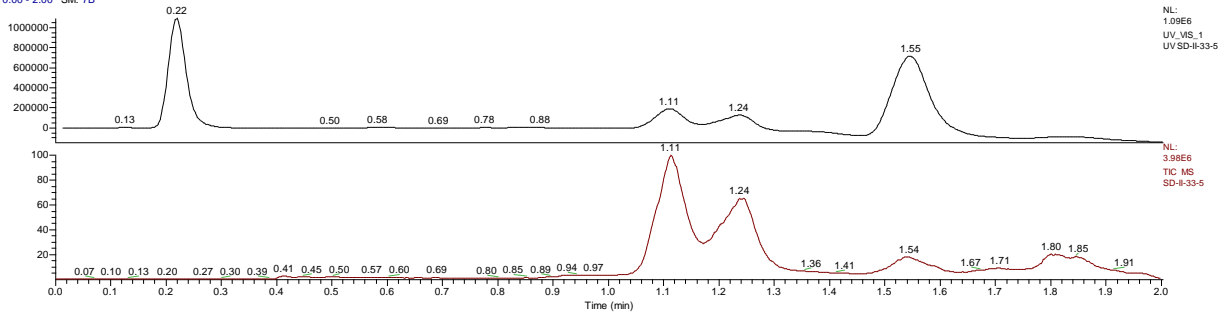

SD-II-33-5 #369-471 RT: 1.04-1.32 AV: 103 NL: 1.44E5  
T: FTMS - c ESI Full ms [500.00-2000.00]

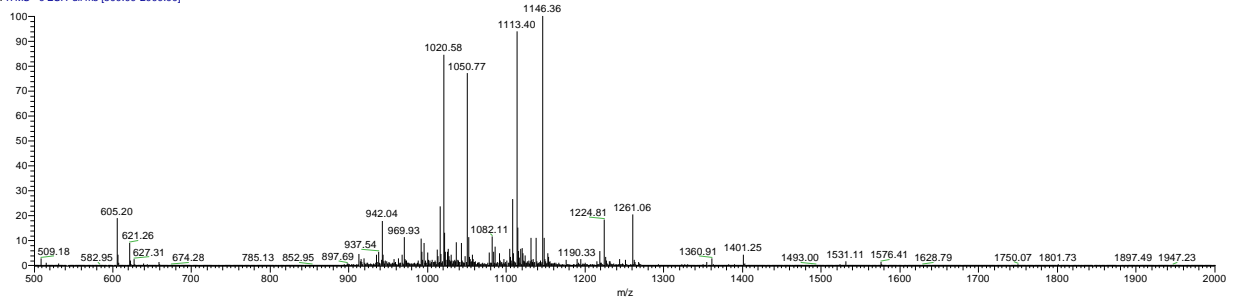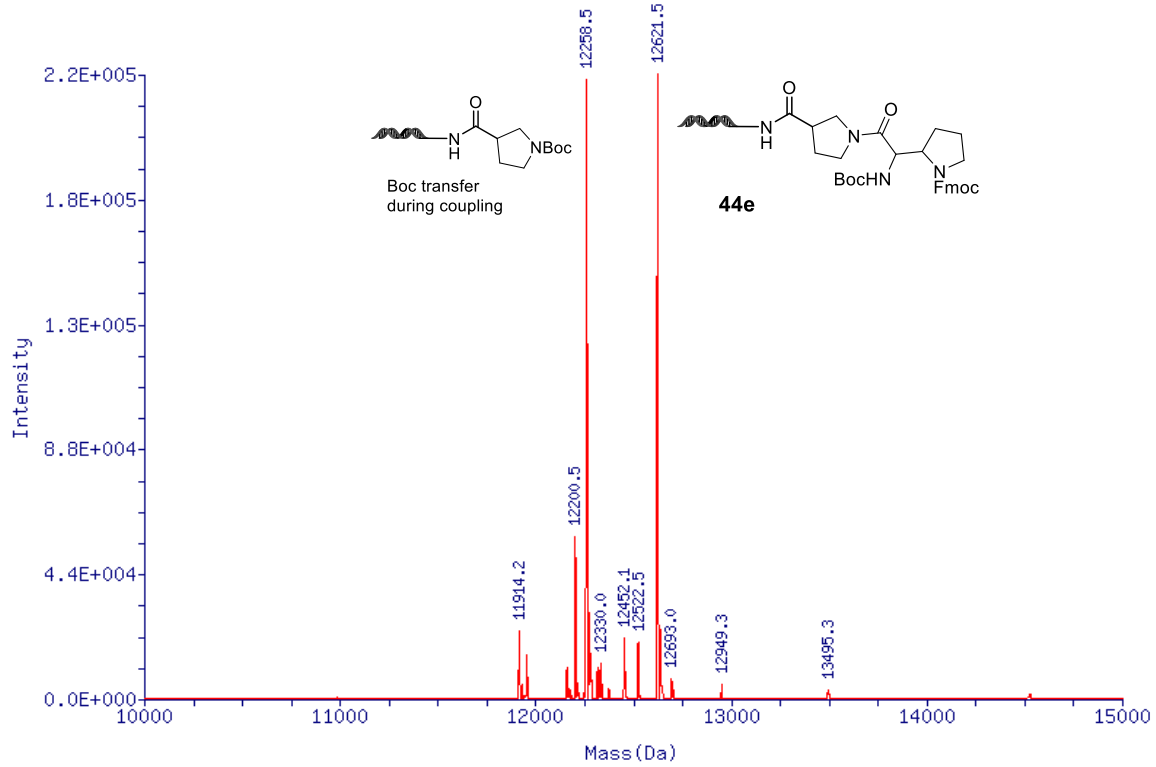

RT: 0.00 - 2.00 SM: 7B

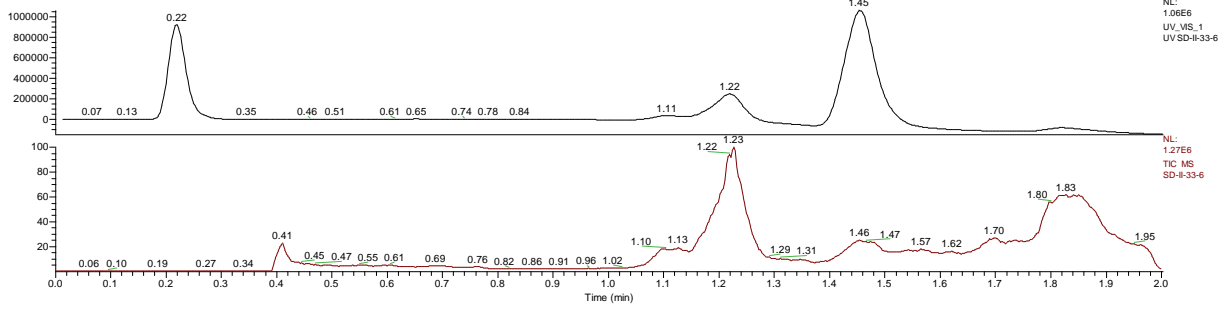SD-II-33-6 #396-460 RT: 1.12-1.30 AV: 65 NL: 9.94E4  
T: ITMS - c ESI Full ms [500.00-2000.00]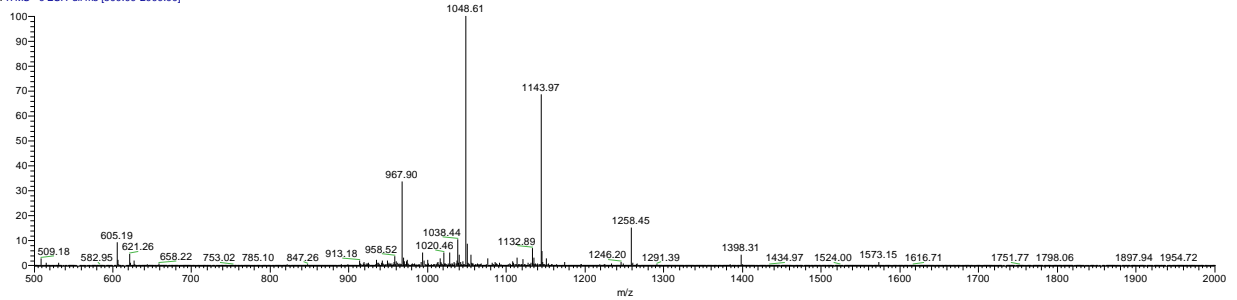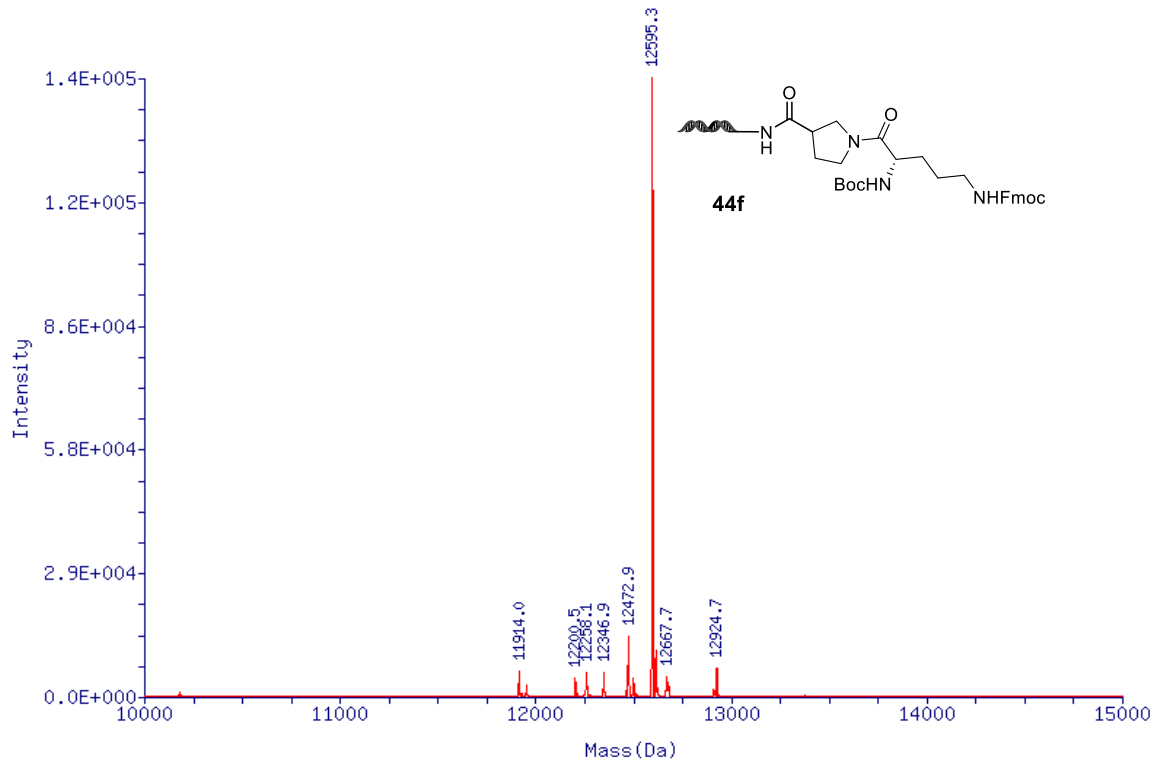

RT: 0.00 - 2.00 SM: 7B

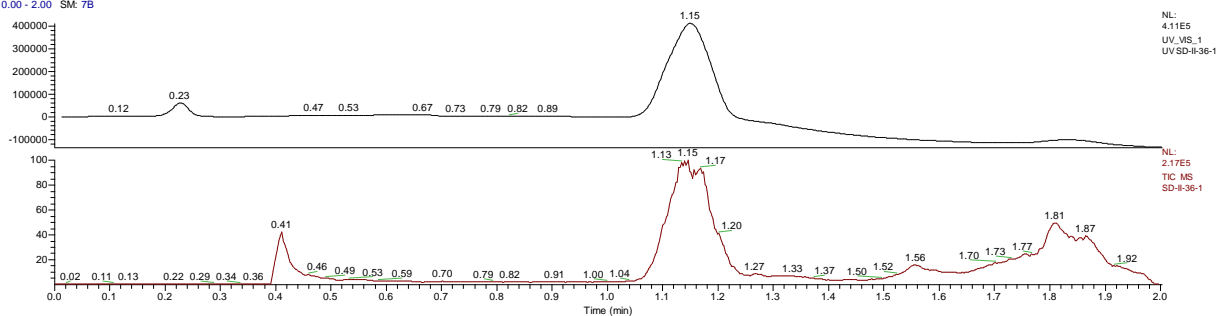

SD-II-36-1 #375-442 RT: 1.06-1.25 AV: 68 NL: 1.92E4  
T: FTMS - c ESI Full ms [500.00-2000.00]

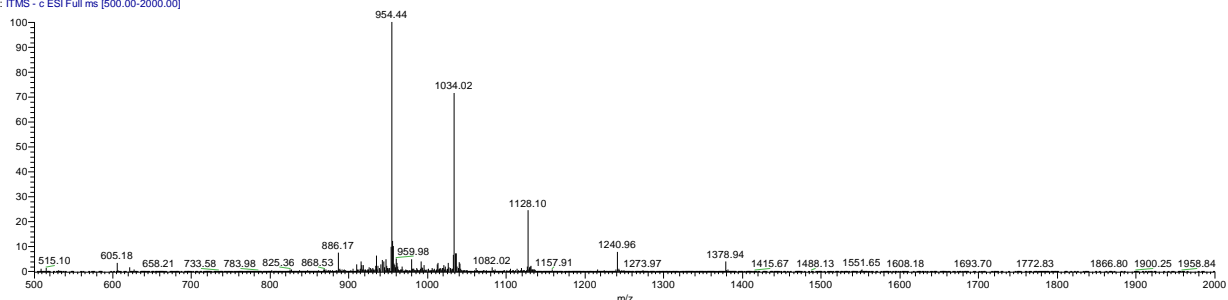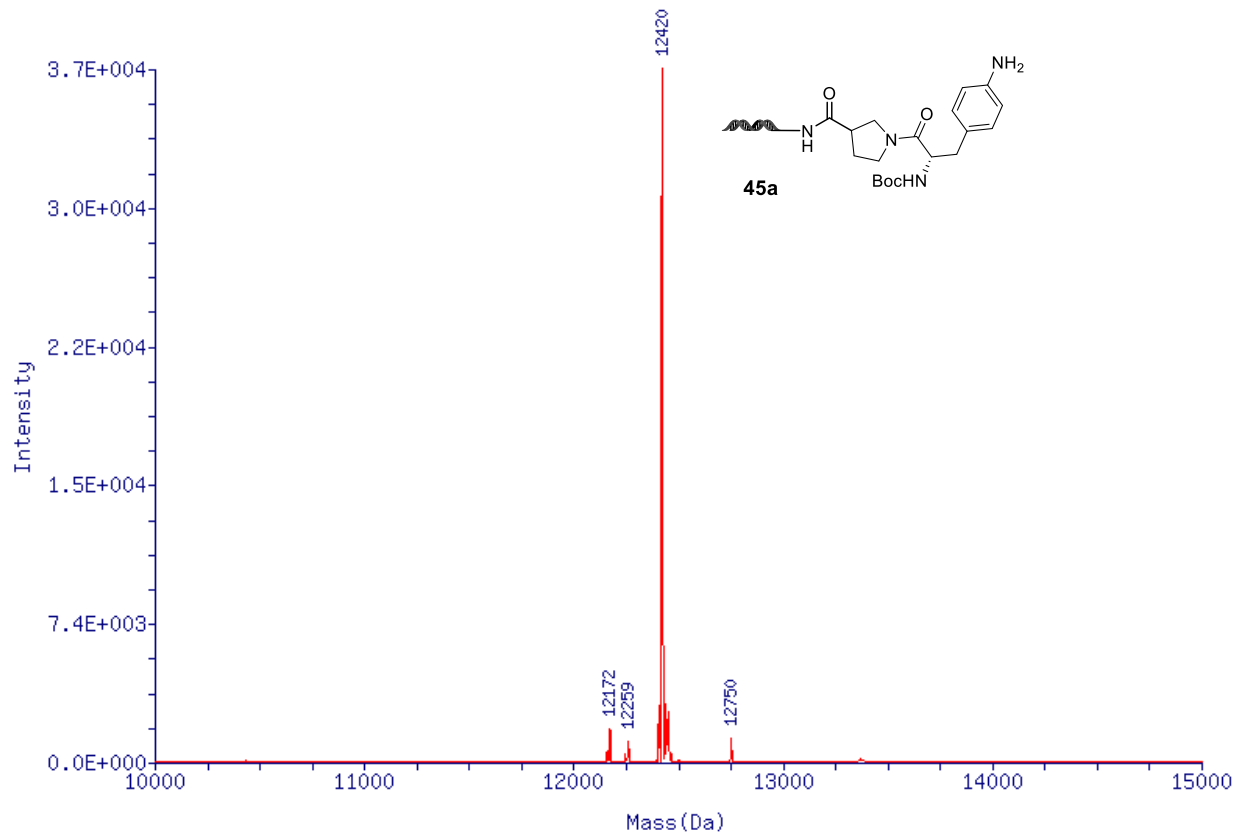

RT: 0.00 - 2.00 SM: 7B

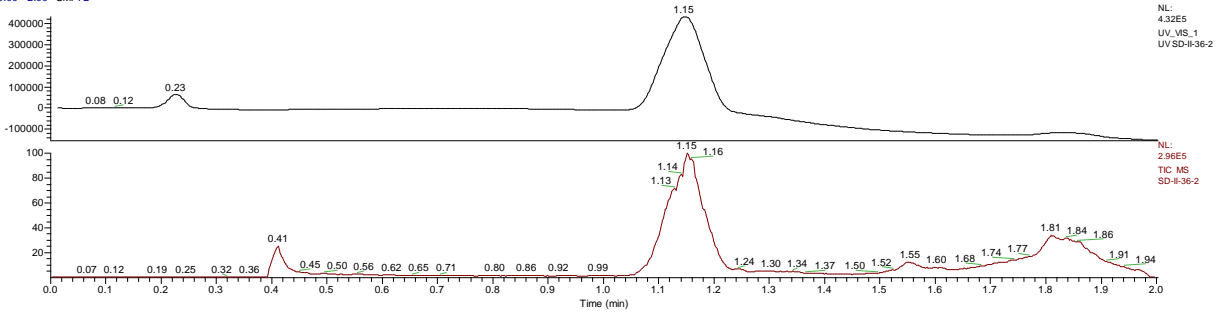

SD-II-36-2 #377-445 RT: 1.06-1.26 AV: 69 NL: 2.47E4  
T: FTMS - c ESI Full ms [500.00-2000.00]

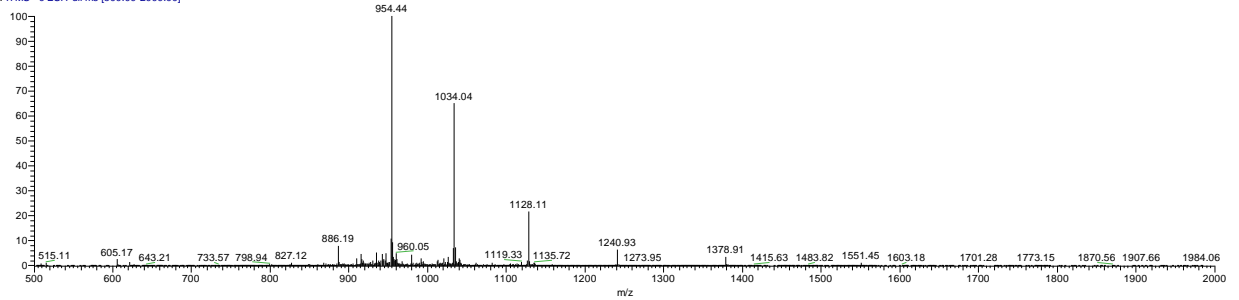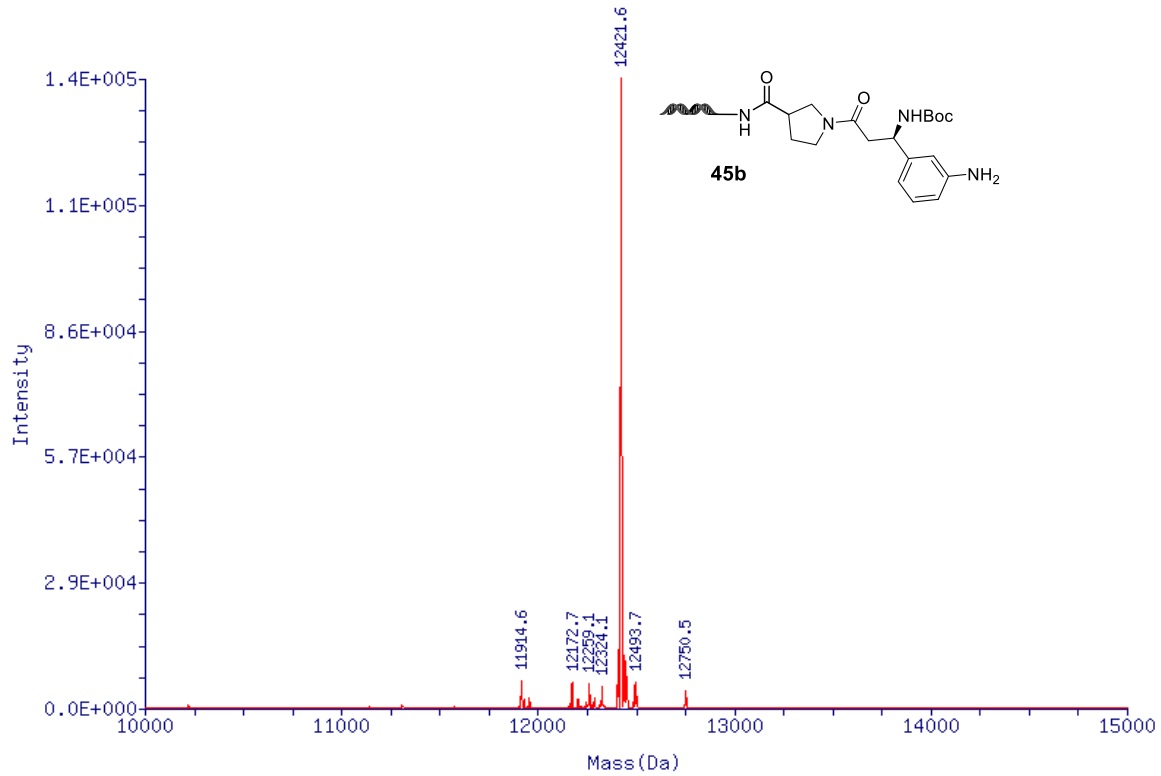

RT: 0.00 - 2.00 SM: 7B

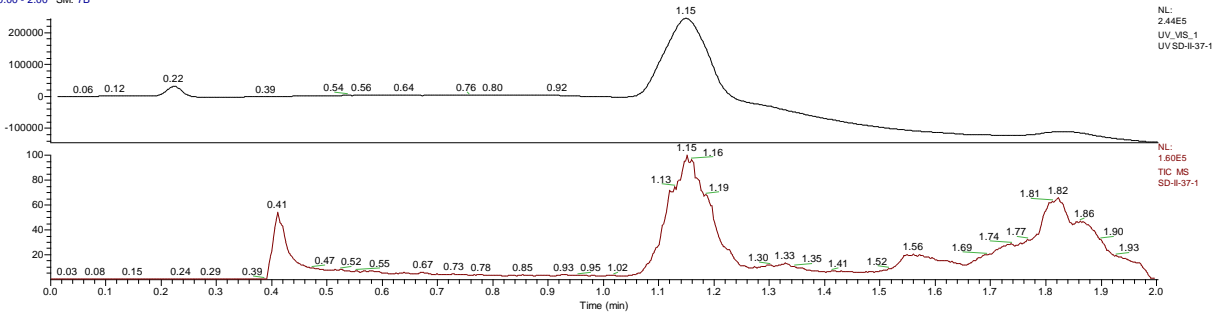

SD-II-37-1 #380-442 RT: 1.07-1.25 AV: 63 NL: 1.12E4  
T: ITMS - c ESI Full ms [500.00-2000.00]

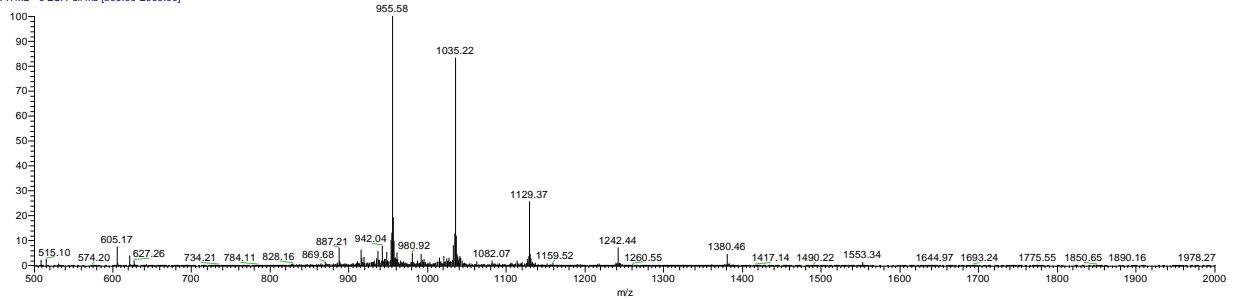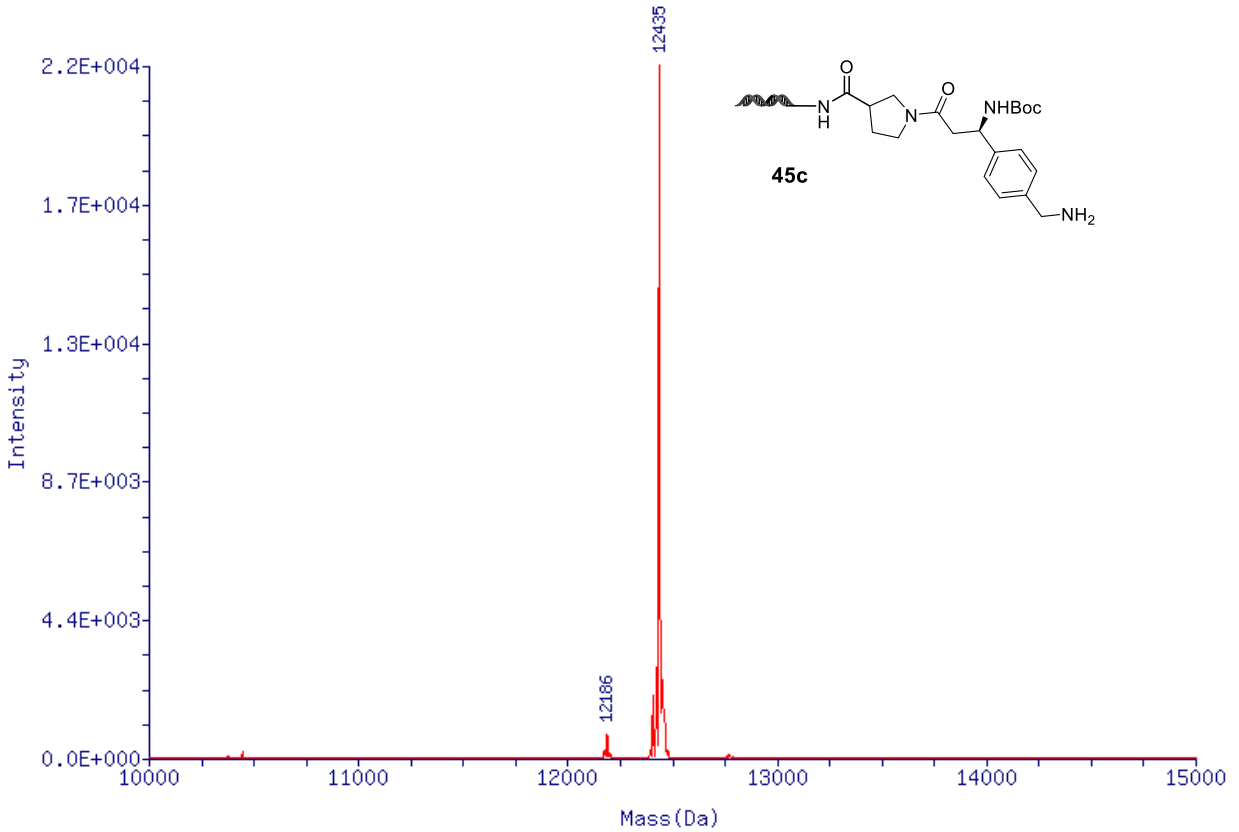

RT: 0.00 - 2.00 SM: 7B

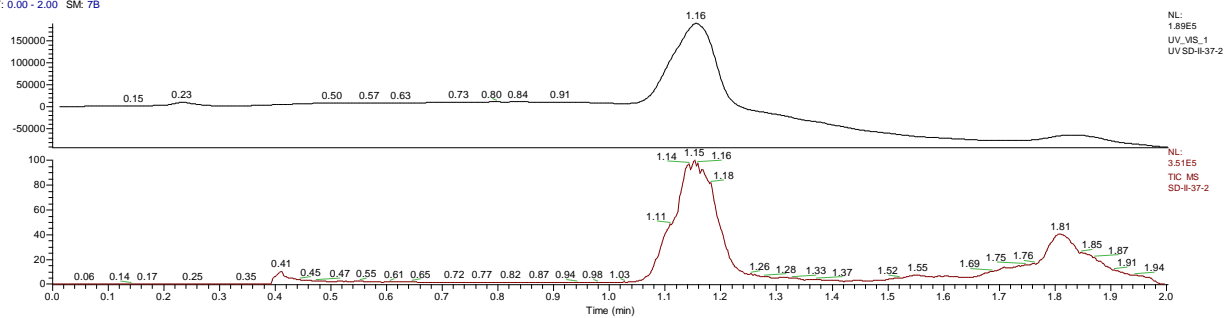

SD-II-37-2 #377-444 RT: 1.06-1.25 AV: 68 NL: 2.71E4  
T: ITMS - c ESI Full ms [500.00-2000.00]

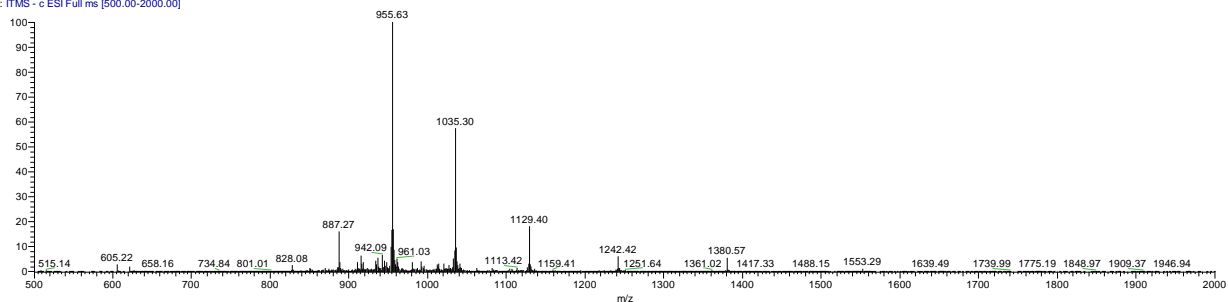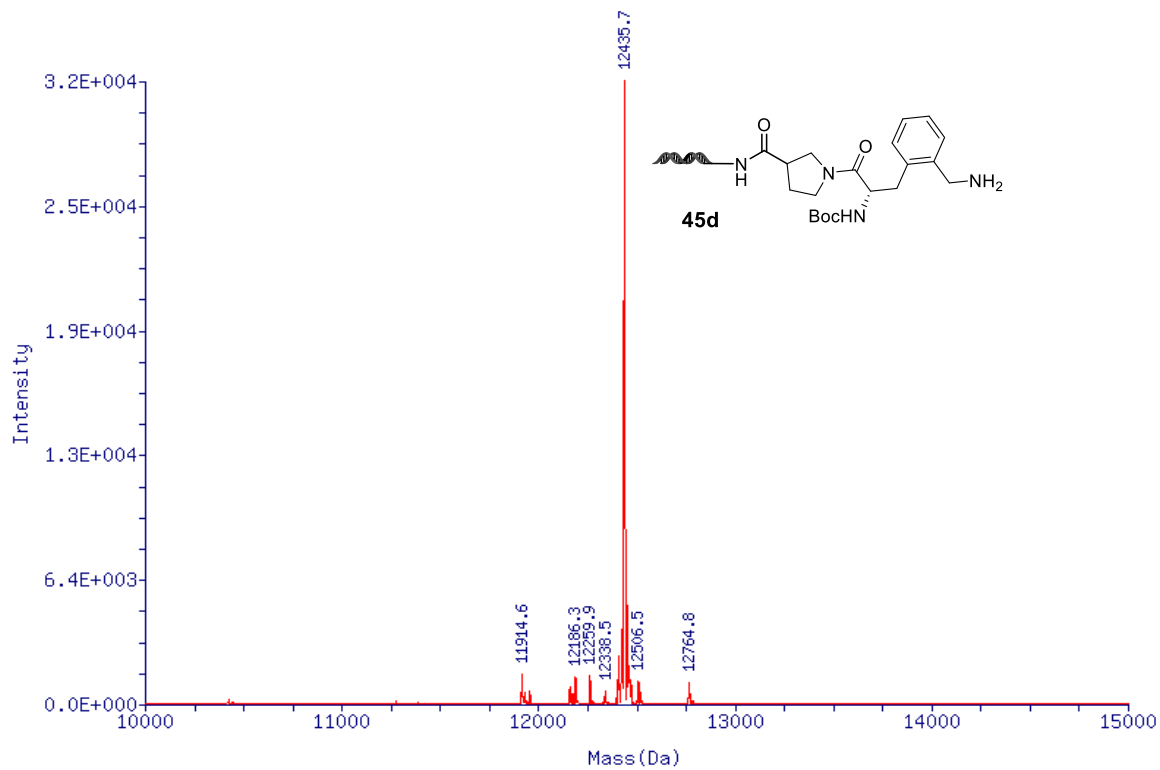

RT: 0.00 - 2.00 SM: 7B

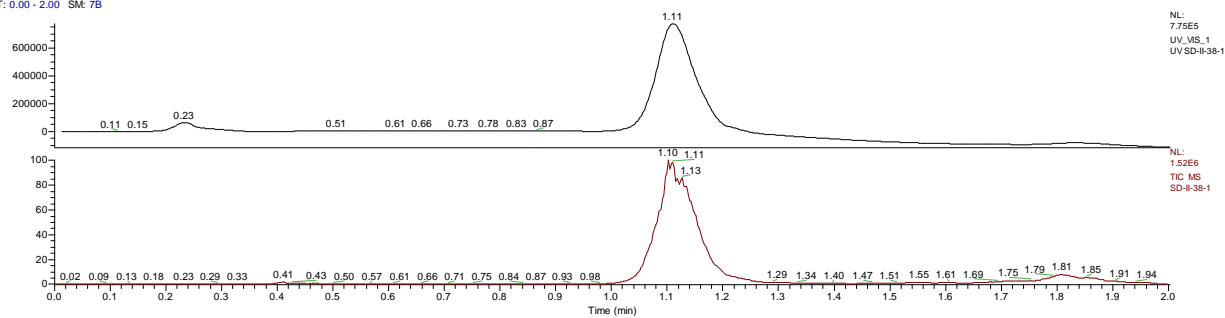

SD-II-38-1 #366-432 RT: 1.03-1.22 AV: 67 NL: 6.39E4  
T: FTMS - c ESI Full ms [500.00-2000.00]

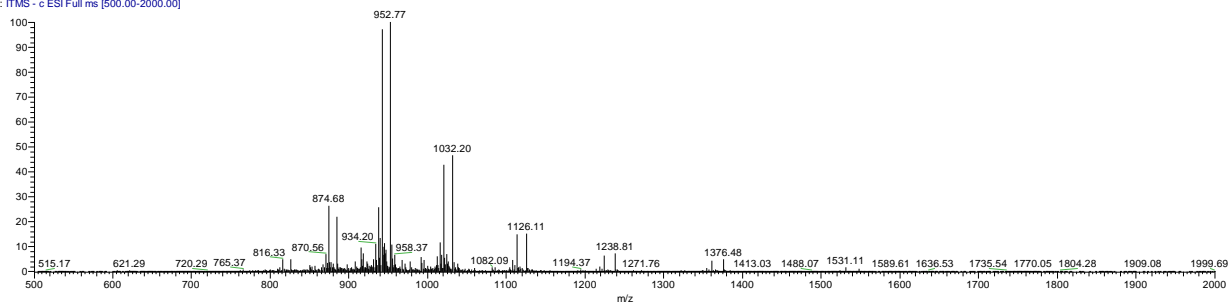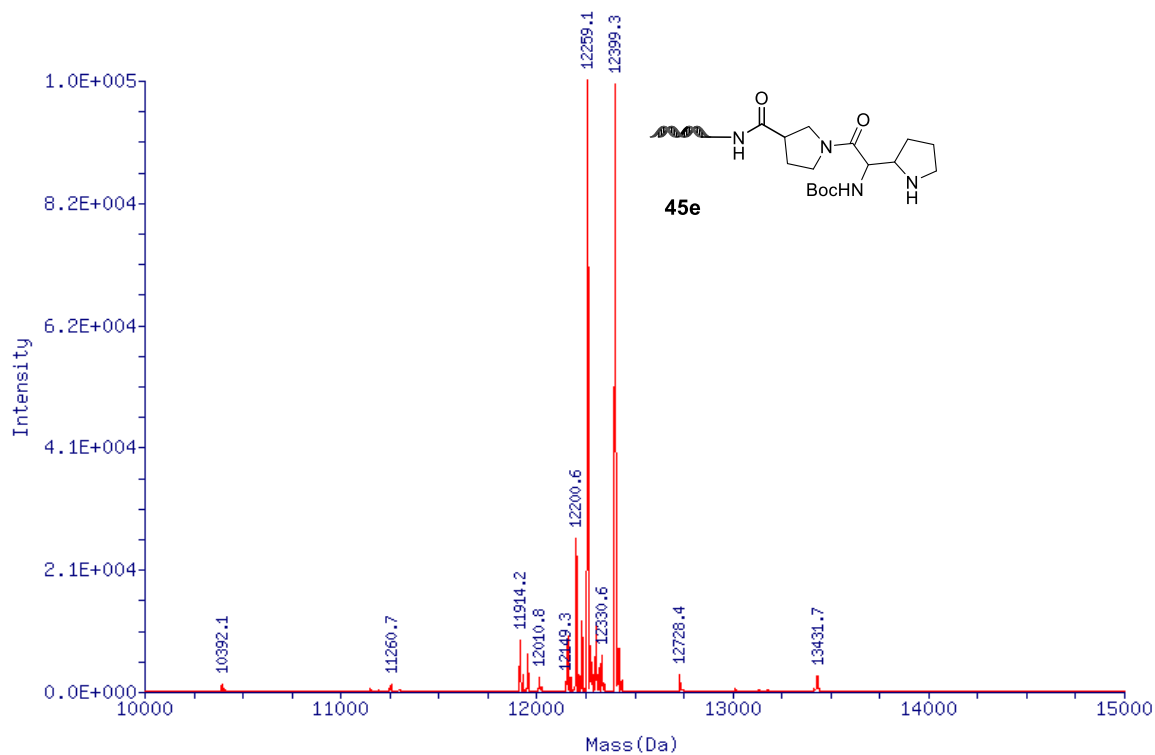

RT: 0.00 - 2.00 SM: 7B

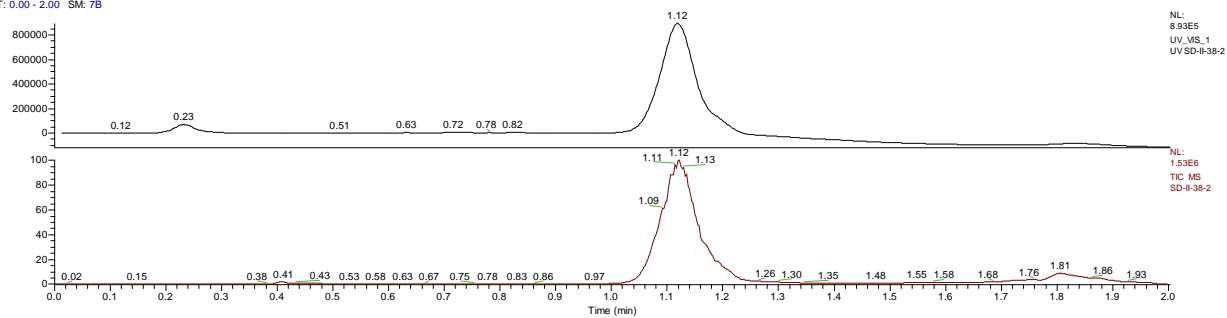

SD-II-38-2 #370-441 RT: 1.04-1.24 AV: 72 NL: 1.20E5  
T: ITMS - c ESI Full ms [500.00-2000.00]

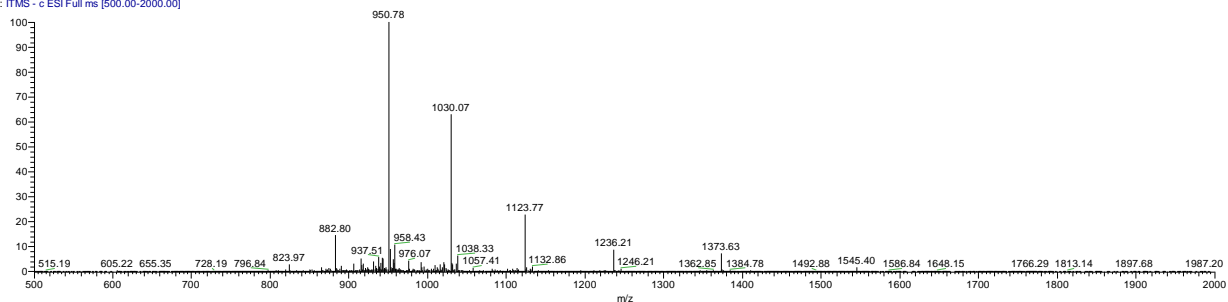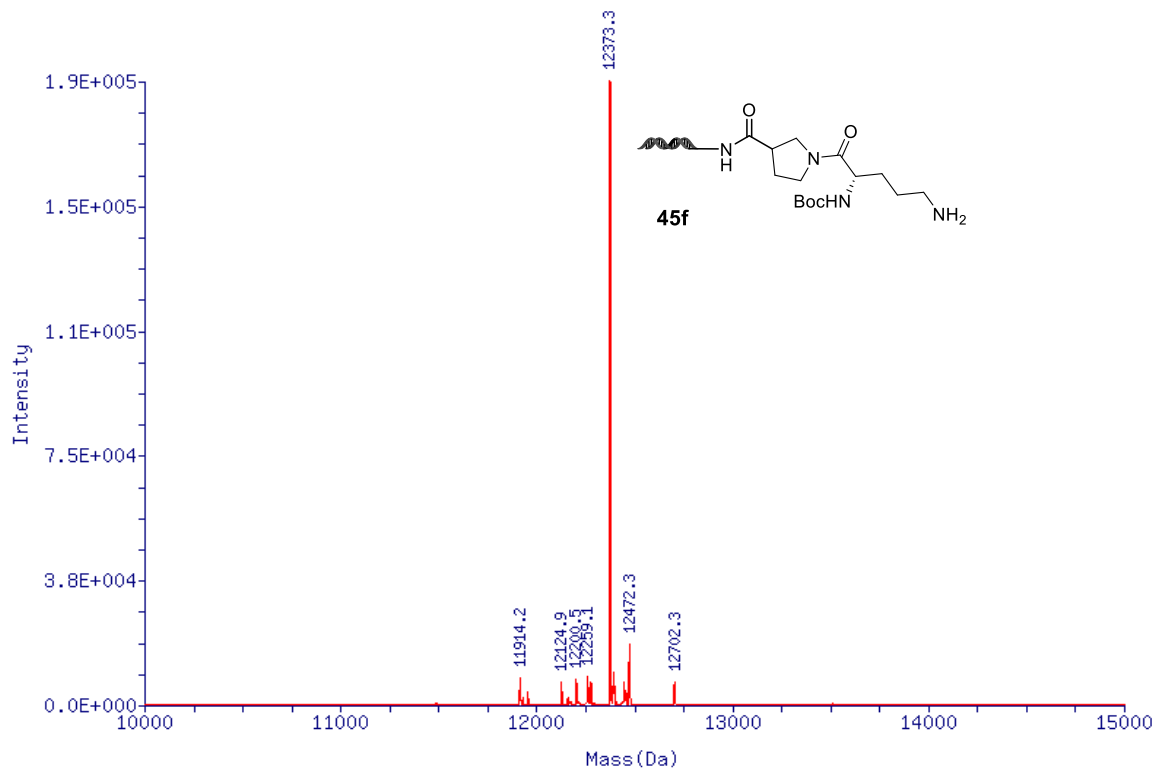



RT: 0.00 - 2.00 SM: 7B

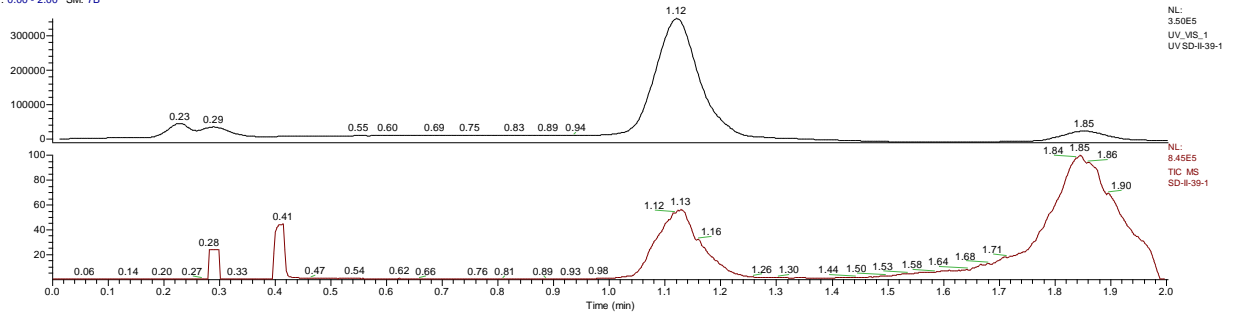

SD-II-39-1 #370-437 RT: 1.04-1.23 AV: 68 NL: 2.14E4  
T: ITMS - c ESI Full ms [500.00-2000.00]

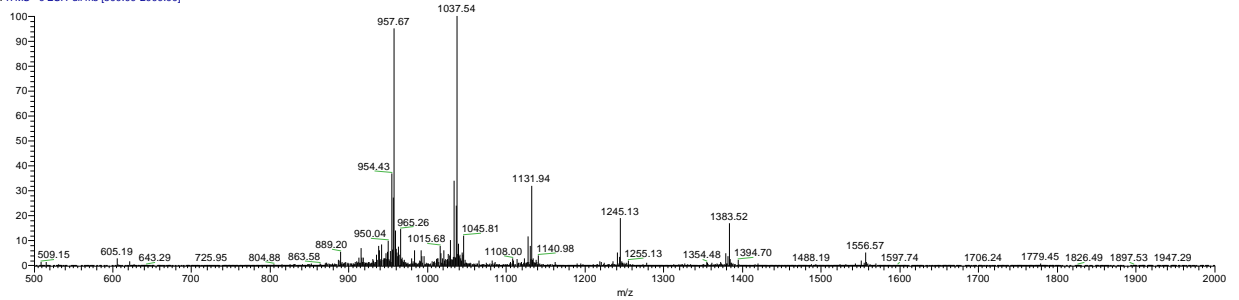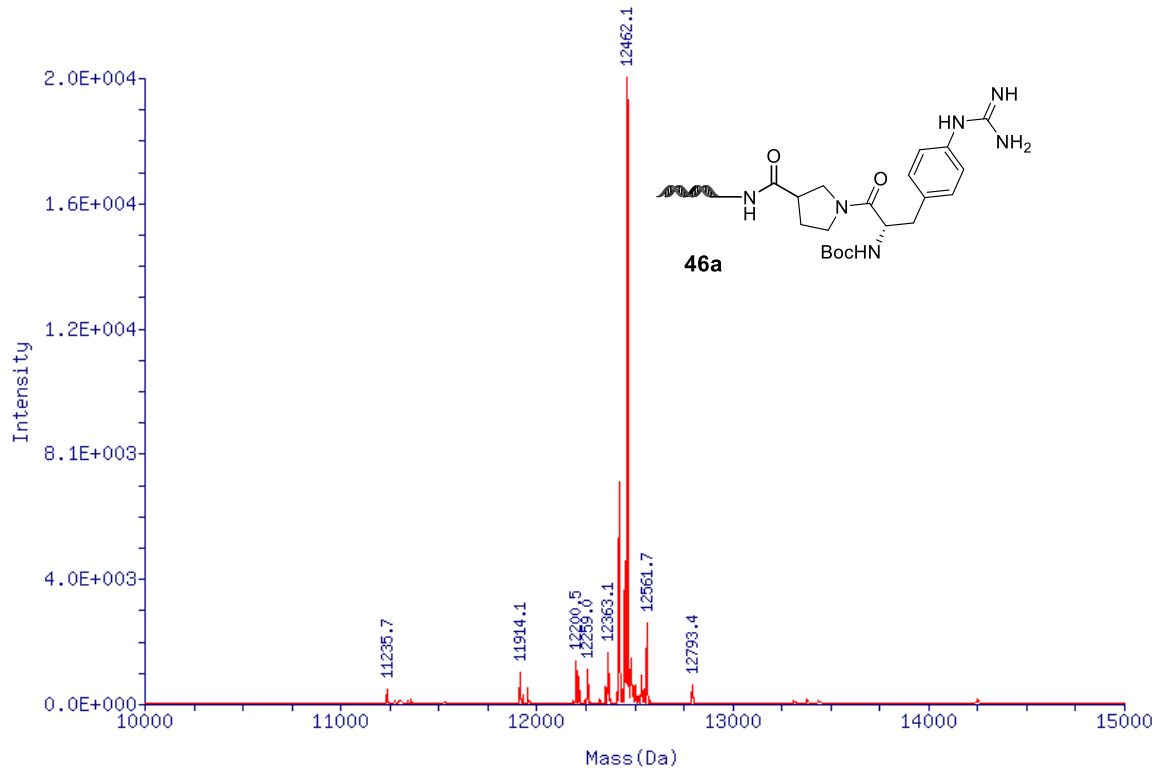

RT: 0.00 - 2.00 SM: 7B

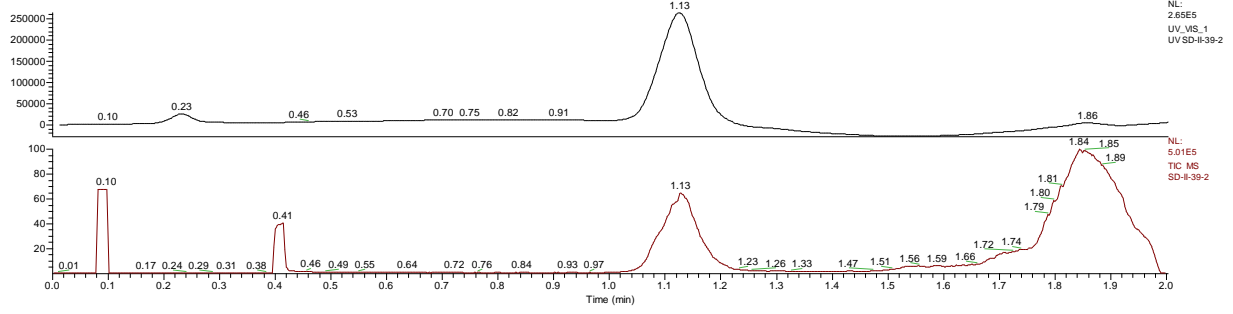

SD-II-39-2 #371-431 RT: 1.05-1.22 AV: 61 NL: 1.87E4  
T: ITMS - c ESI Full ms [500.00-2000.00]

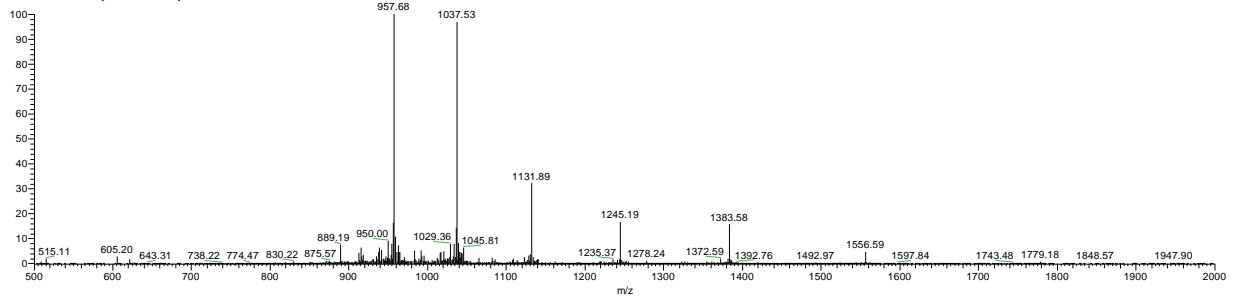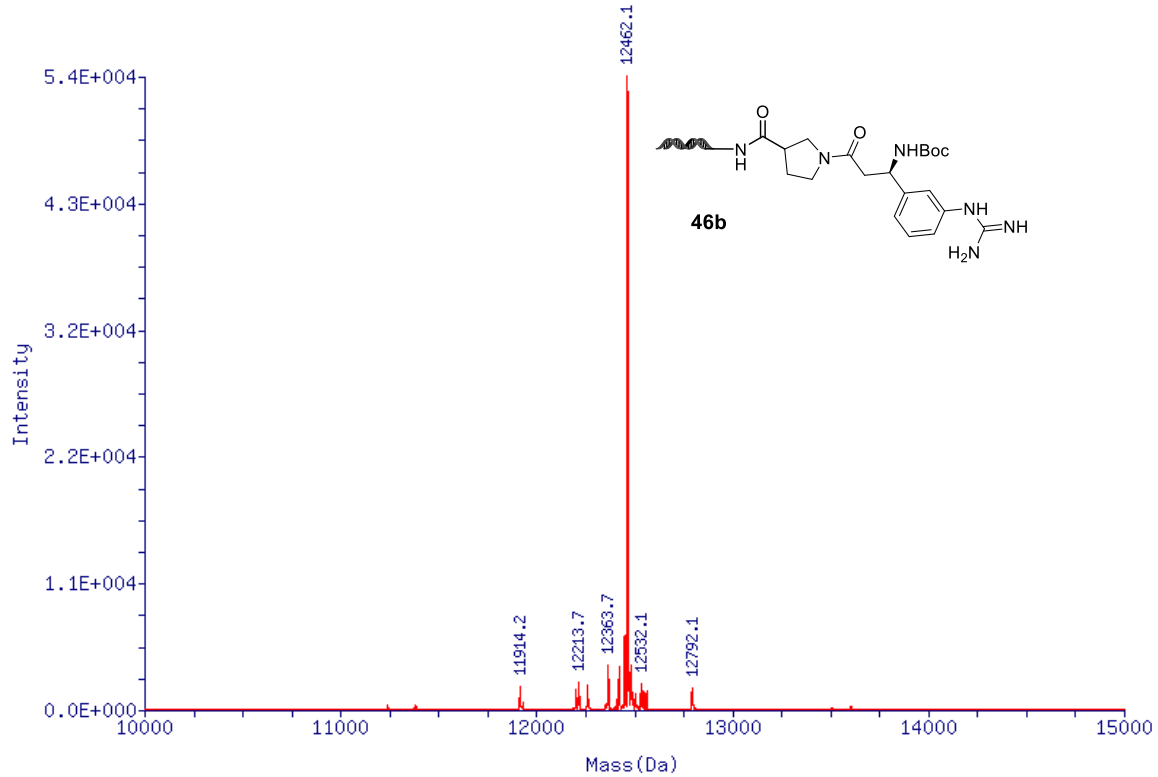

RT: 0.00 - 2.00 SM: 7B

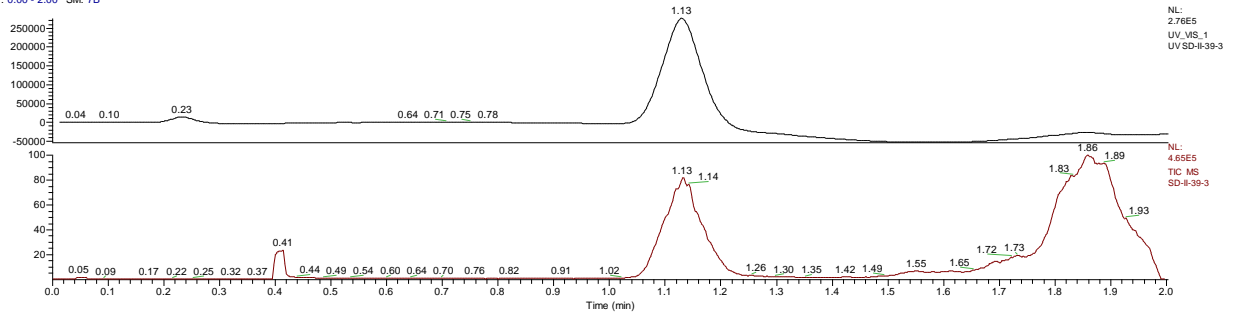

SD-II-39-3 #374-432 RT: 1.05-1.22 AV: 59 NL: 1.92E4  
T: FTMS - c ESI Full ms [500.00-2000.00]

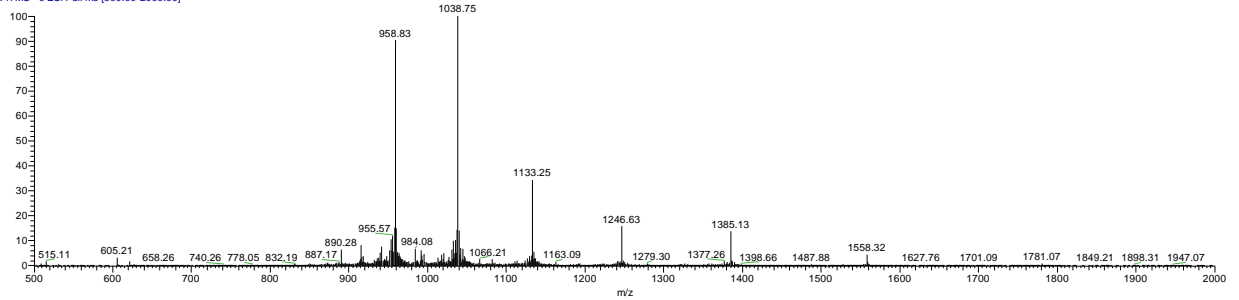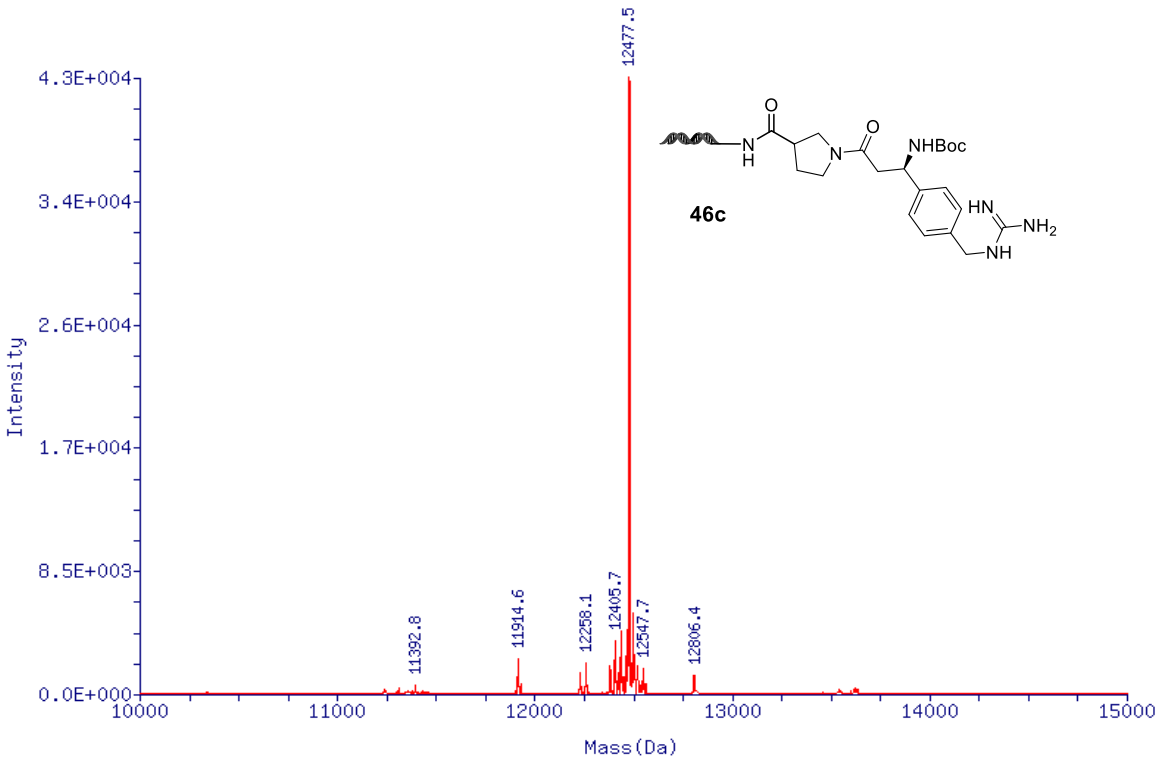

RT: 0.00 - 2.00 SM: 7B

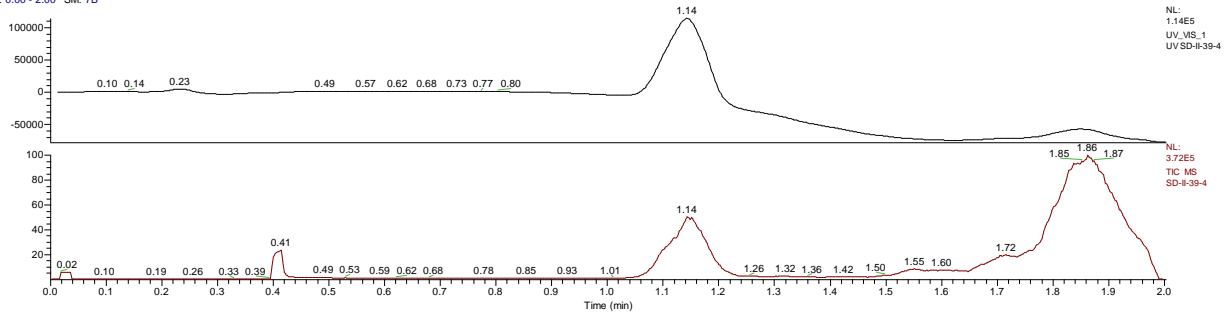

SD-II-39-4 #376-435 RT: 1.06-1.23 AV: 60 NL: 1.15E4  
T: FTMS - c ESI Full ms [500.00-2000.00]

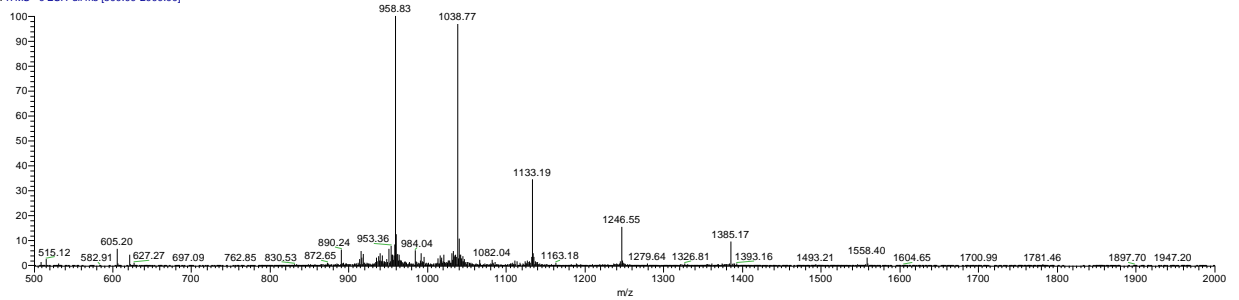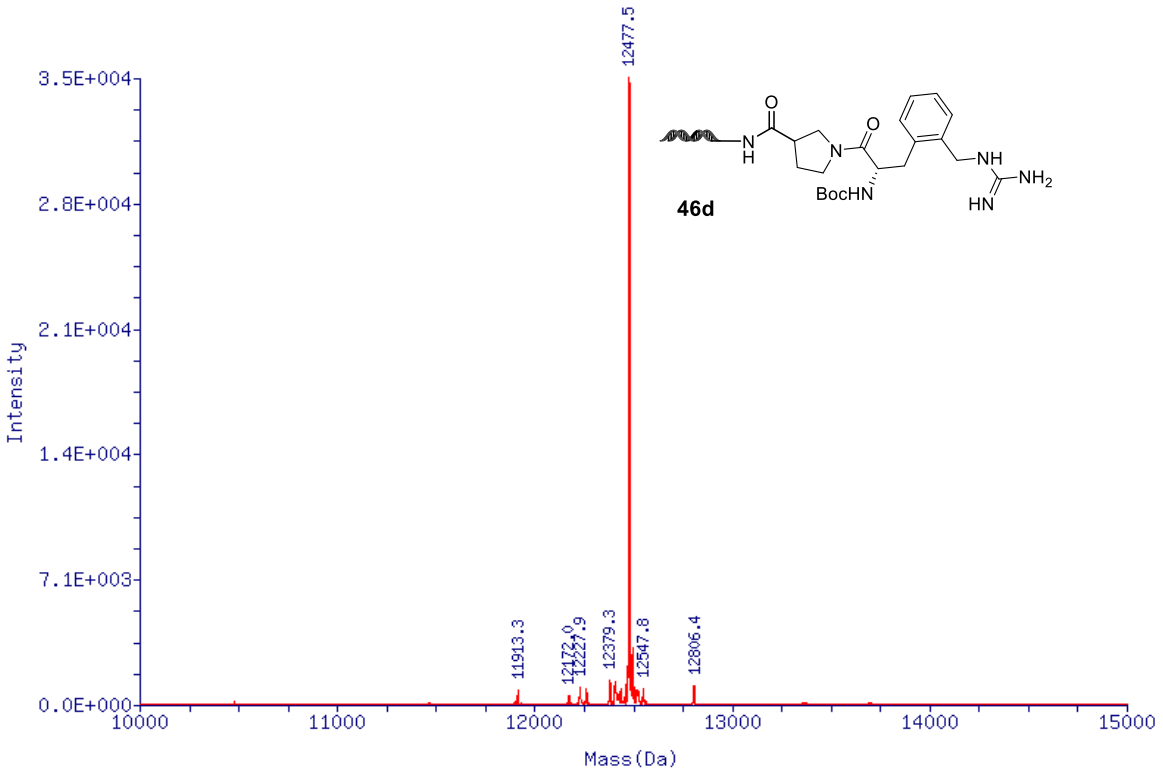

RT: 0.00 - 2.00 SM: 7B

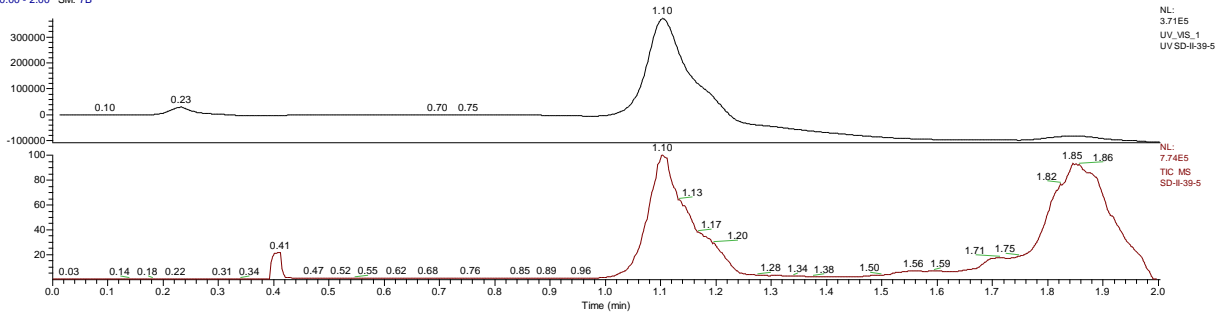

SD-II-39-5 #367-439 RT: 1.04-1.24 AV: 73 NL: 2.57E4  
T: ITMS - c ESI Full ms [500.00-2000.00]

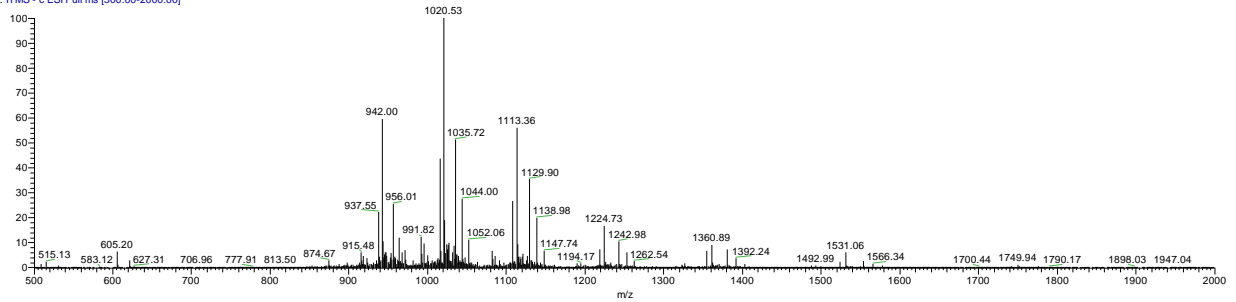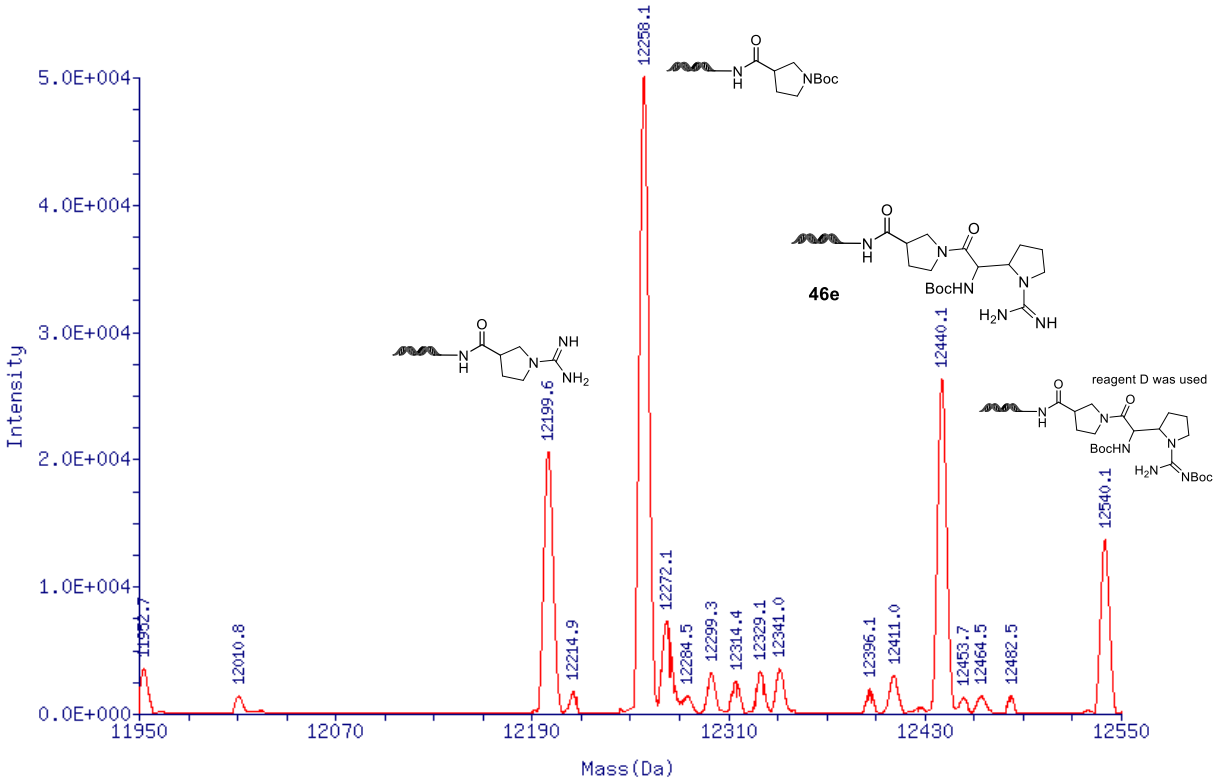

RT: 0.00 - 2.00 SM: 7B

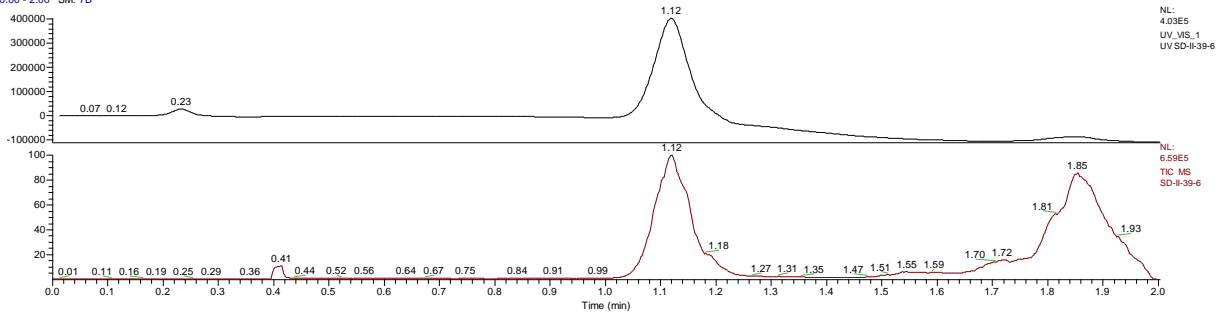

SD-II-39-6 #372-431 RT: 1.05-1.22 AV: 60 NL: 5.18E4  
T: FTMS - c ESI Full ms [500.00-2000.00]

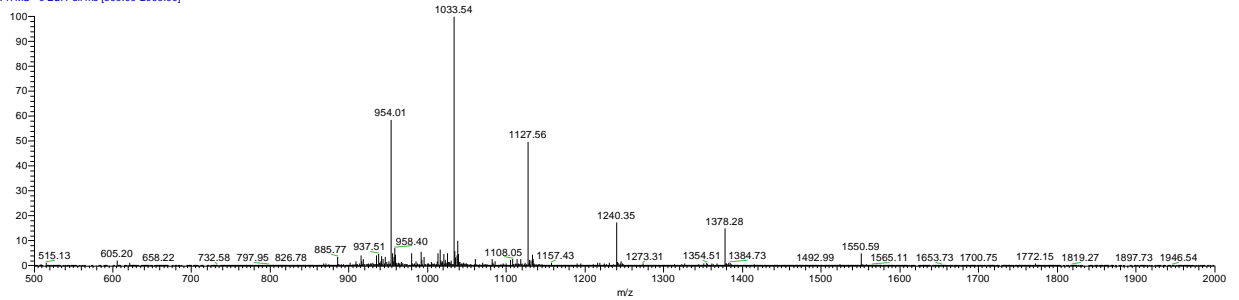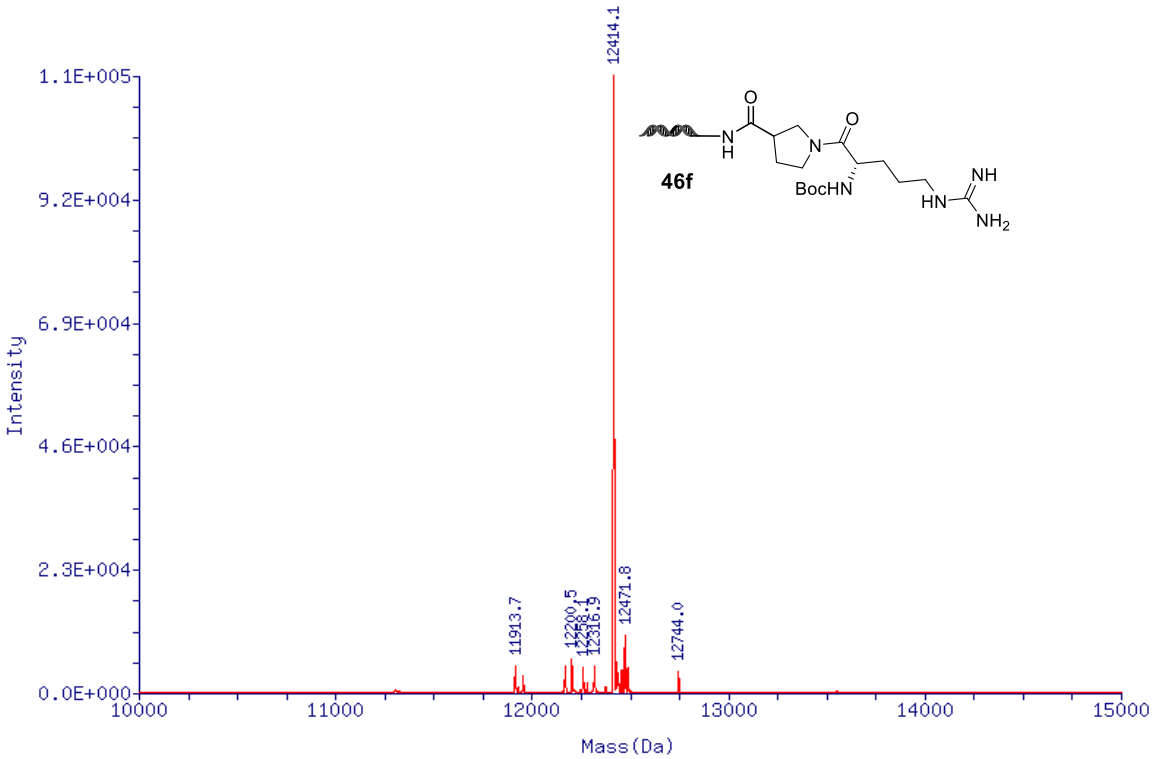

RT: 0.00 - 2.00 SM: 7B

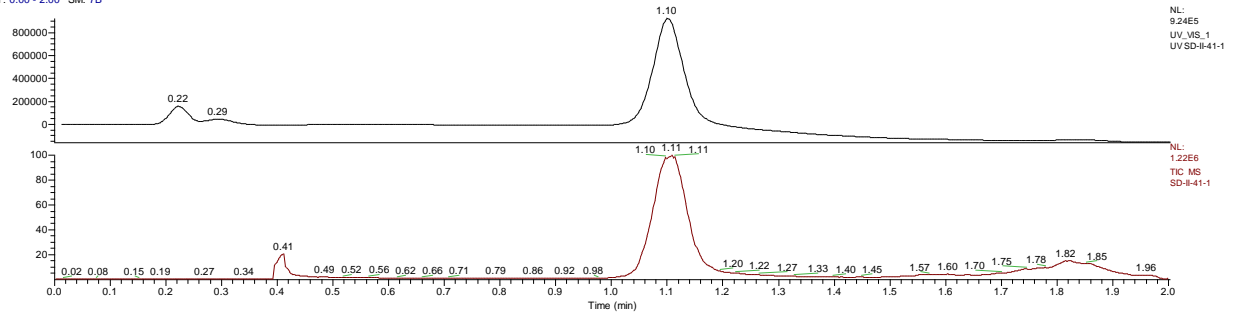SD-II-41-1 #366-421 RT: 1.03-1.19 AV: 56 NL: 4.95E4  
T: FTMS - c ESI Full ms [500.00-2000.00]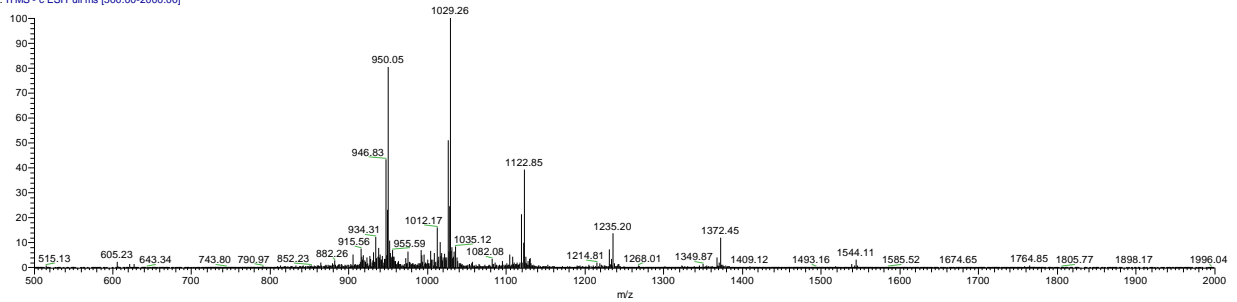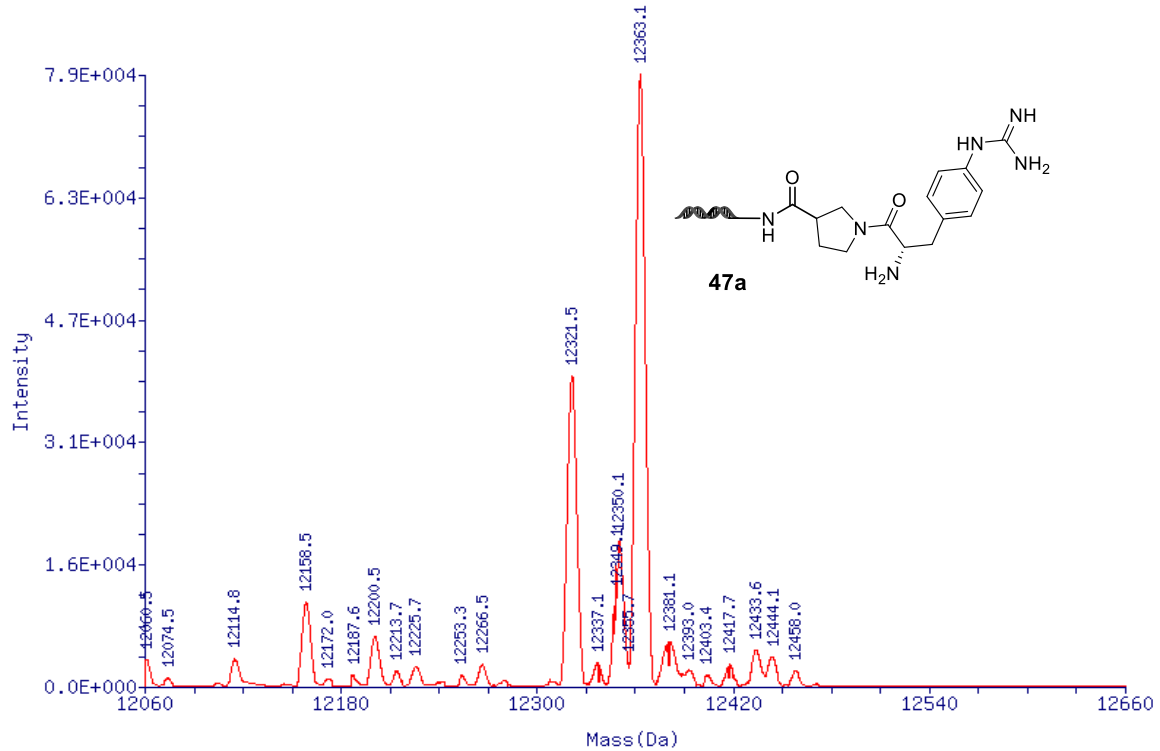

RT: 0.00 - 2.00 SM: 7B

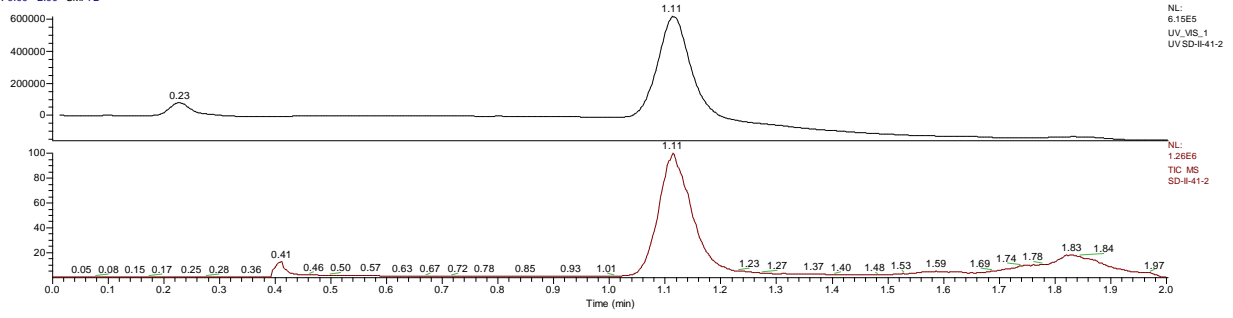

SD-II-41-2 #369-436 RT: 1.04-1.23 AV: 68 NL: 3.58E4  
T: FTMS - c ESI Full ms [500.00-2000.00]

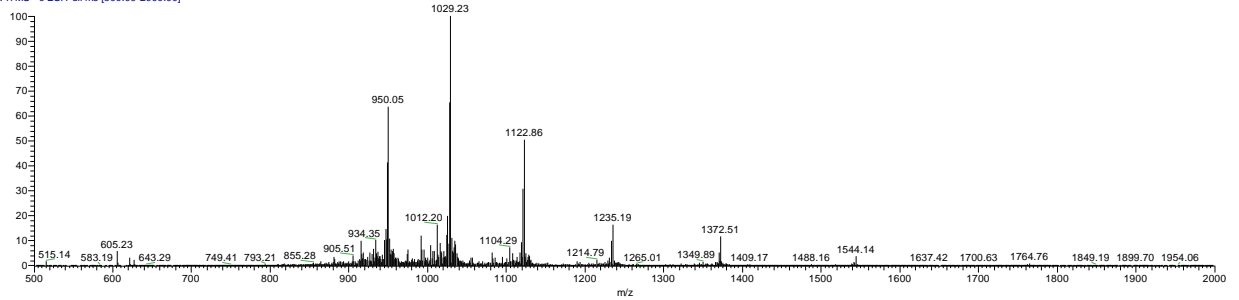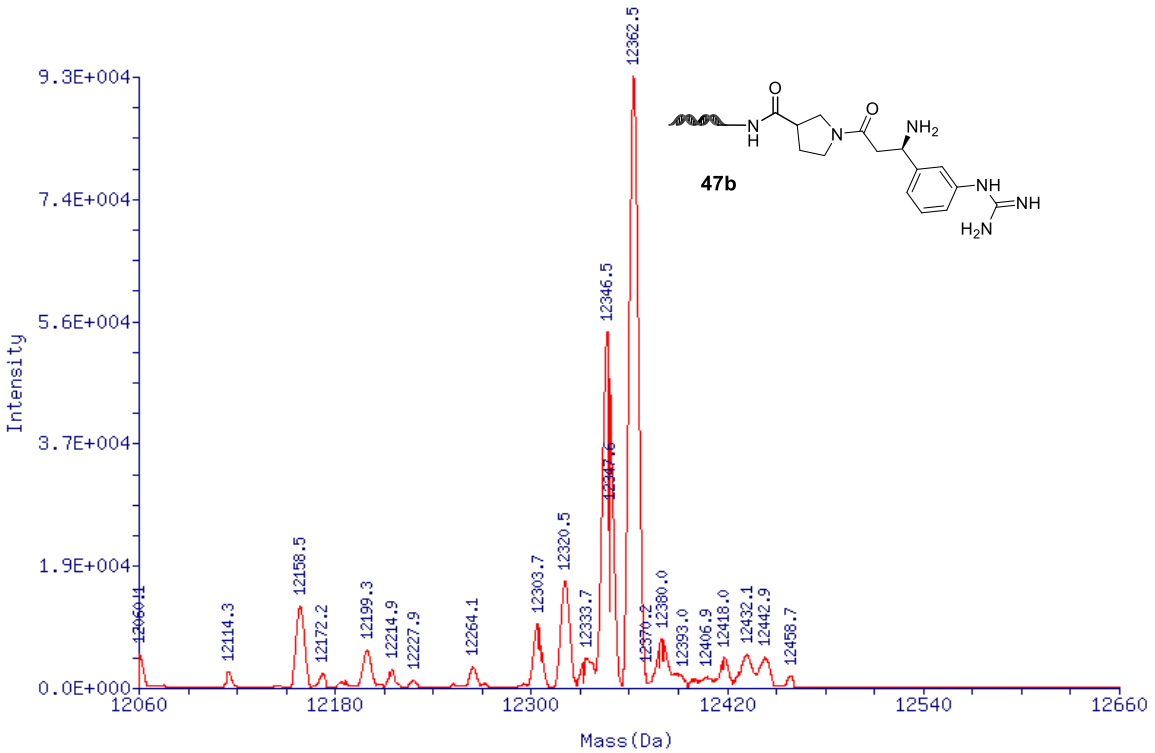



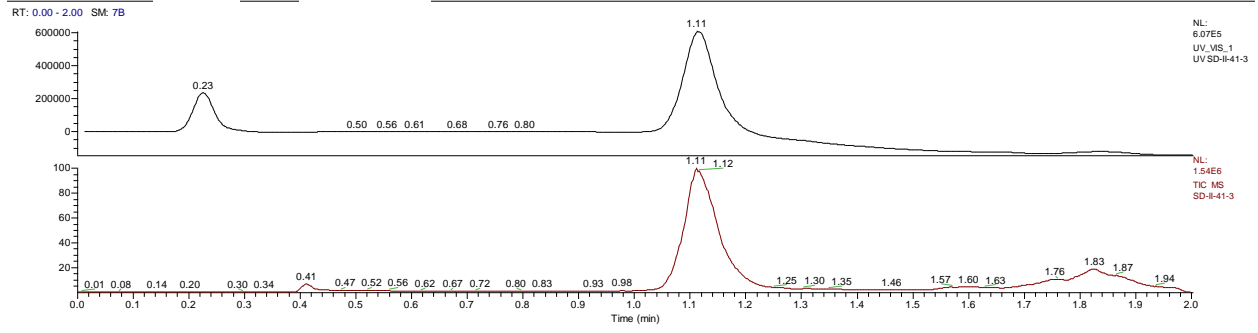

SD-II-41-3 #379-422 RT: 1.07-1.19 AV: 44 NL: 4.43E4  
T: FTMS - c ESI Full ms [500.00-2000.00]

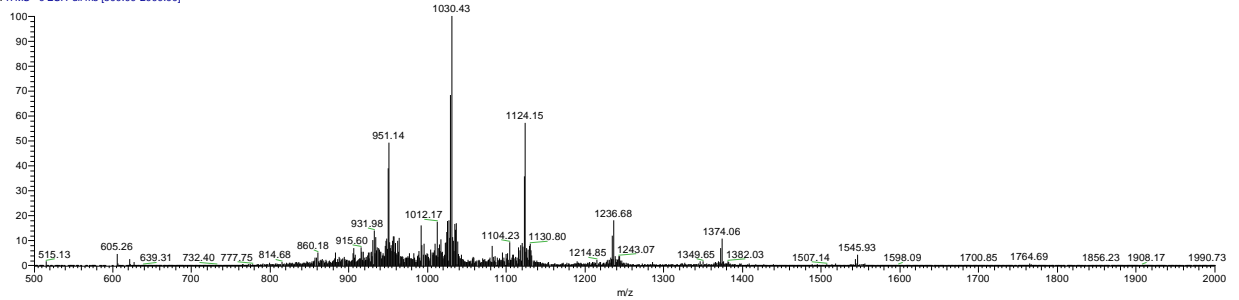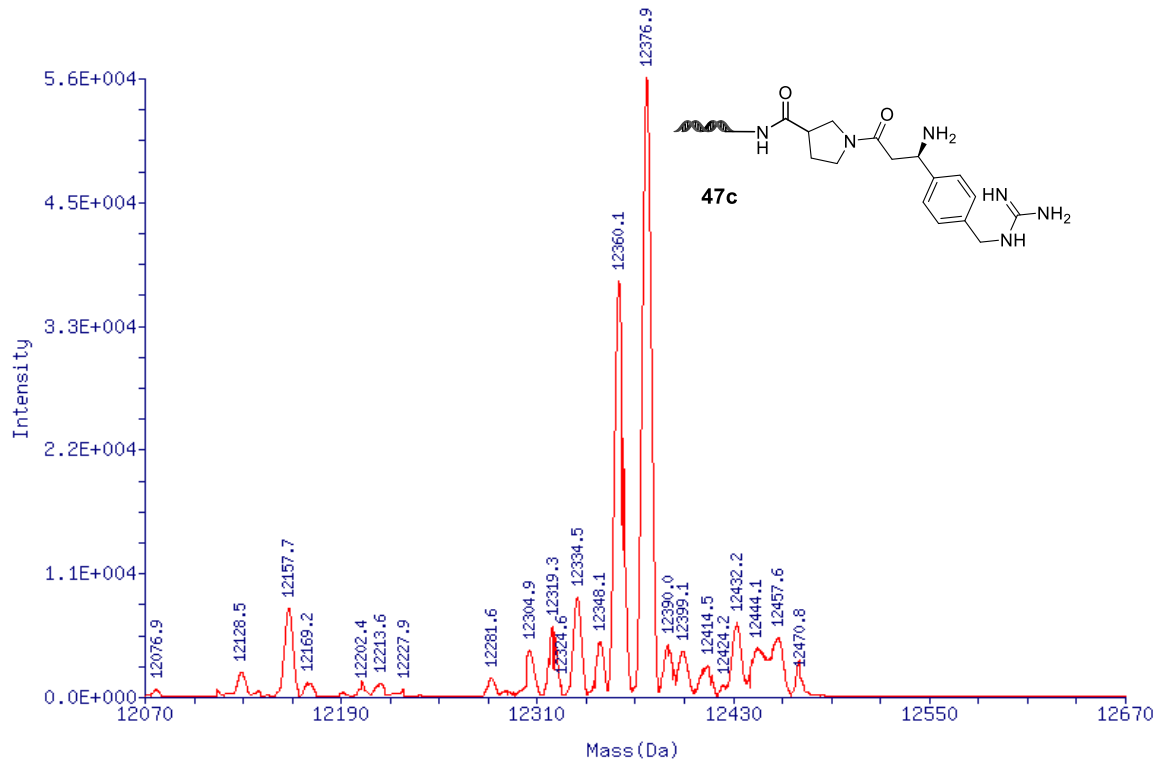

RT: 0.00 - 2.00 SM: 7B

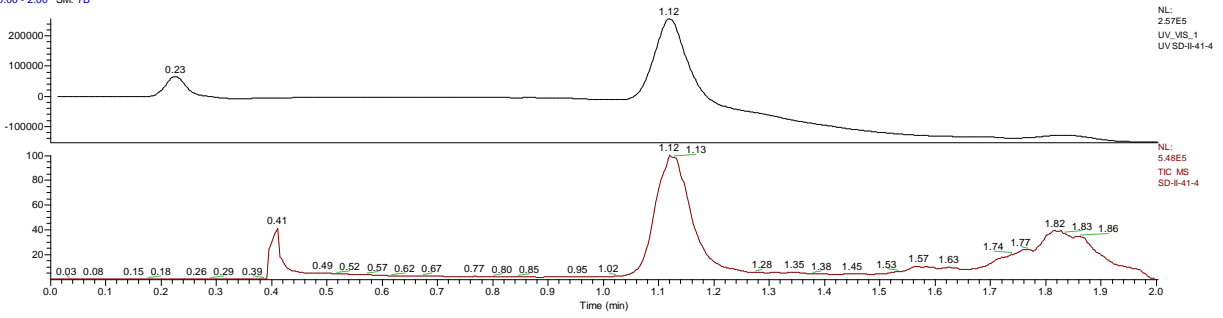

SD-II-41-4 #369-433 RT: 1.04-1.22 AV: 65 NL: 2.08E4  
T: FTMS - c ESI Full ms [500.00-2000.00]

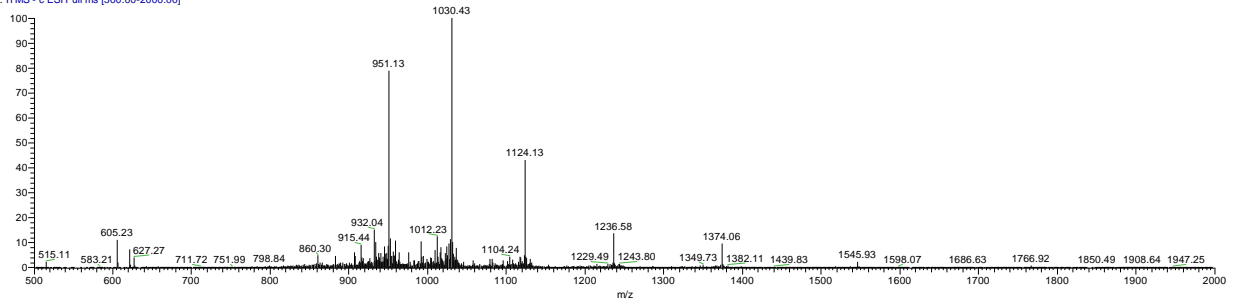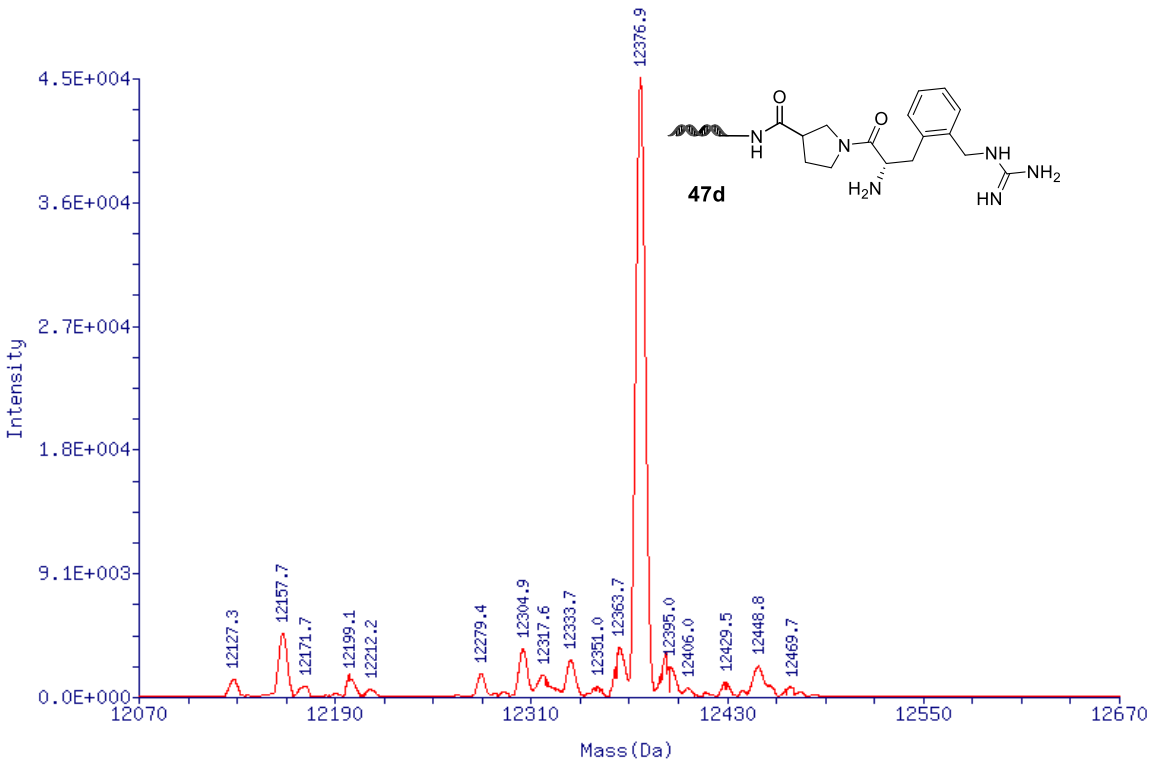

RT: 0.00 - 2.00 SM: 7B

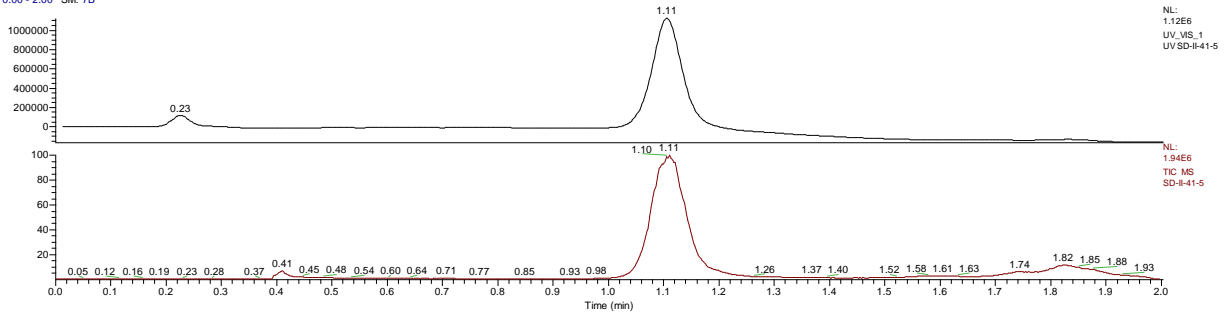

SD-II-41-5 #372-430 RT: 1.05-1.21 AV: 59 NL: 5.22E4  
 T: FTMS - c ESI Full ms [500.00-2000.00]

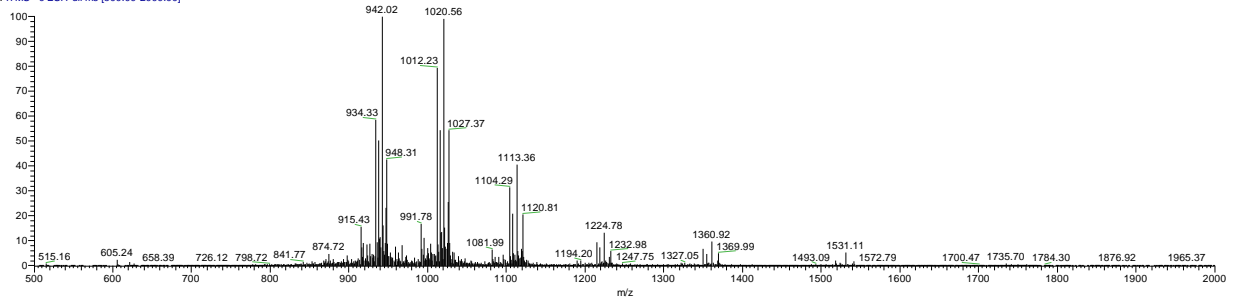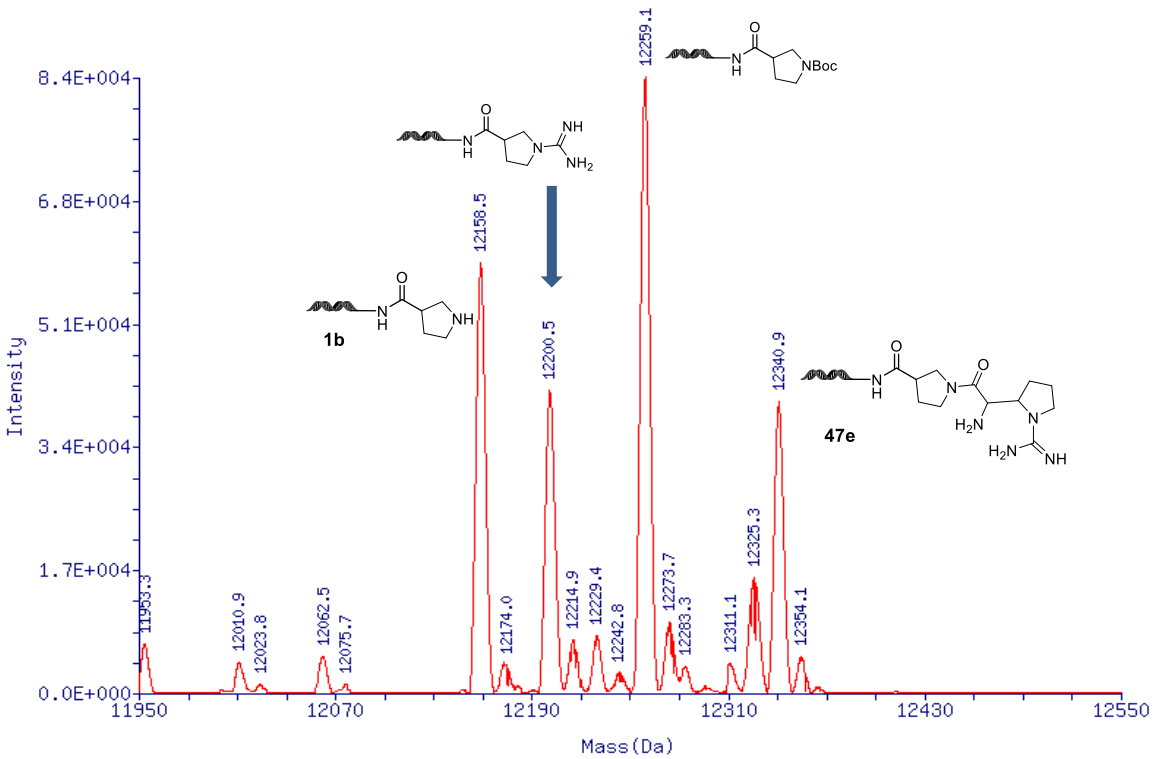

RT: 0.00 - 2.00 SM: 7B

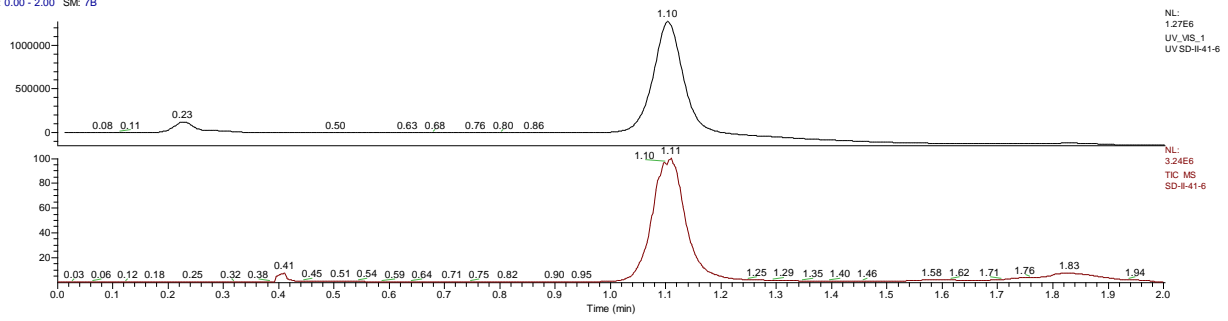SD-II-41-6 #365-437 RT: 1.03-1.23 AV: 73 NL: 1.66E5  
T: ITMS - c ESI Full ms [500.00-2000.00]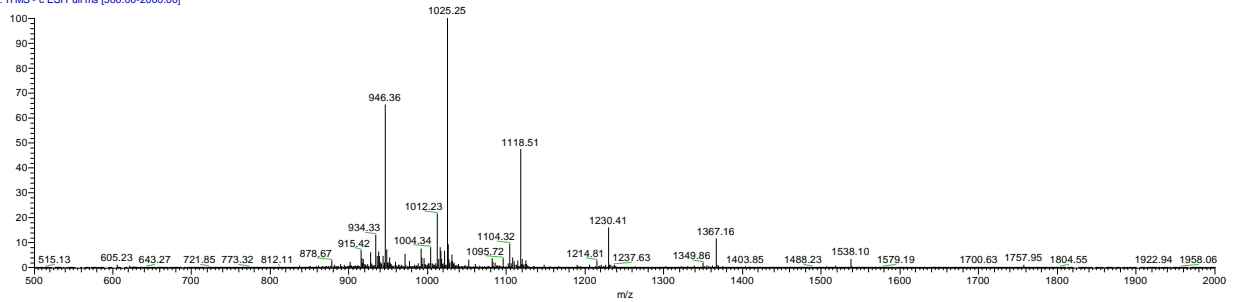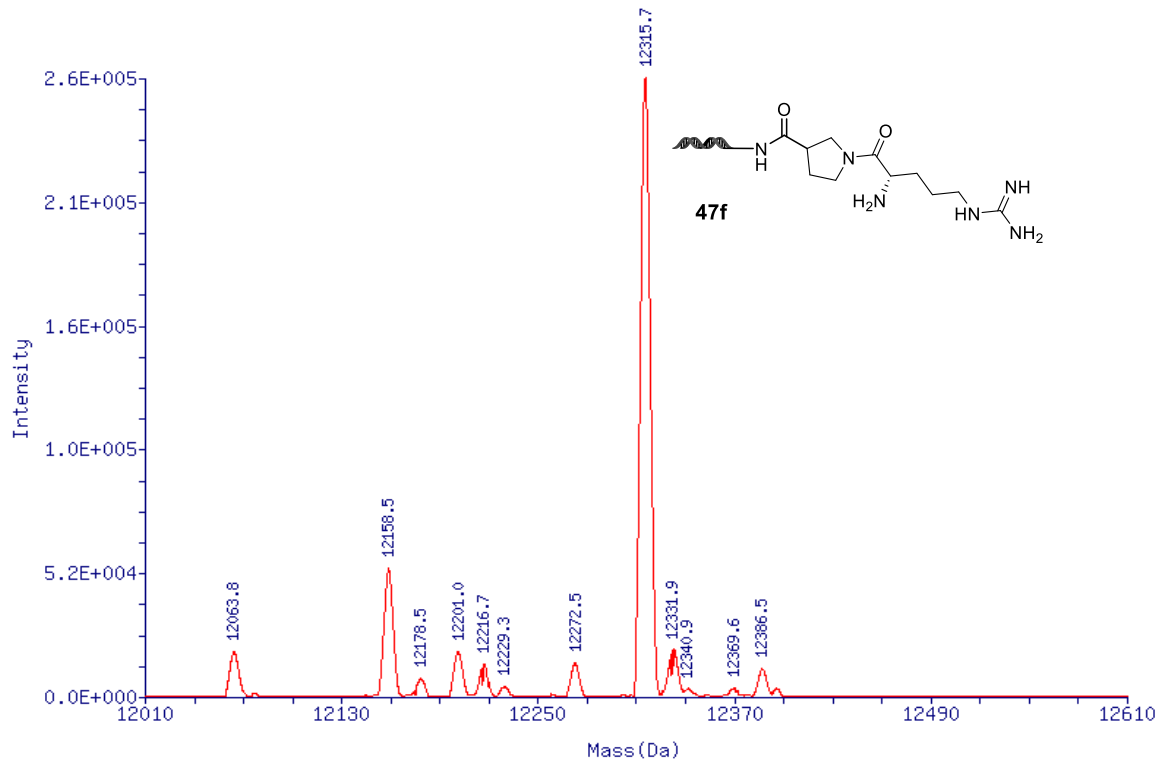

SD-II-42-1\_181220121320

4.00

RT: 0.00 - 2.00 SM: 7B

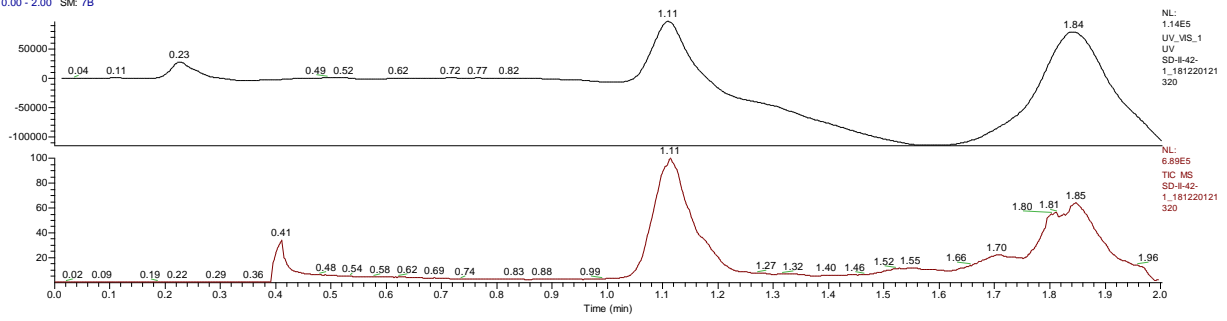

SD-II-42-1\_181220121320 #369-444 RT: 1.04-1.25 AV: 76 NL: 2.10E4  
T: FTMS - c ESI Full ms [500.00-2000.00]

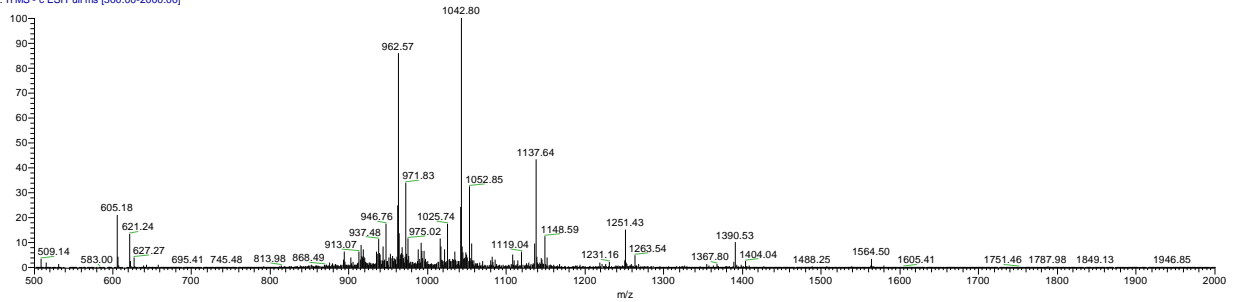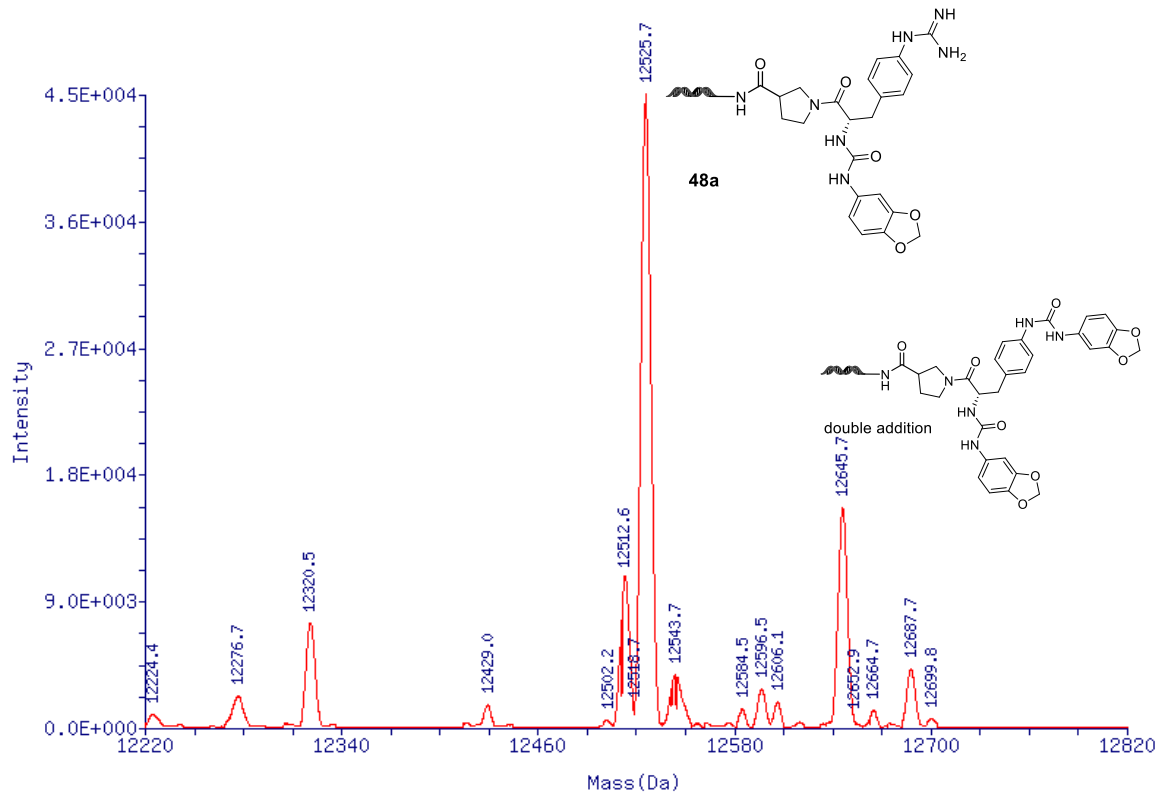

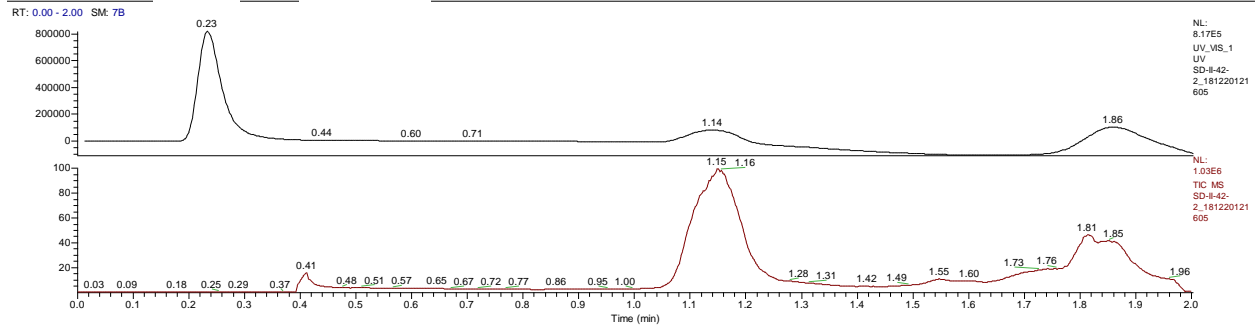

SD-II-42-2\_181220121605 #375-443 RT: 1.06-1.25 AV: 69 NL: 4.22E4  
T: ITMS - c ESI Full ms [500.00-2000.00]

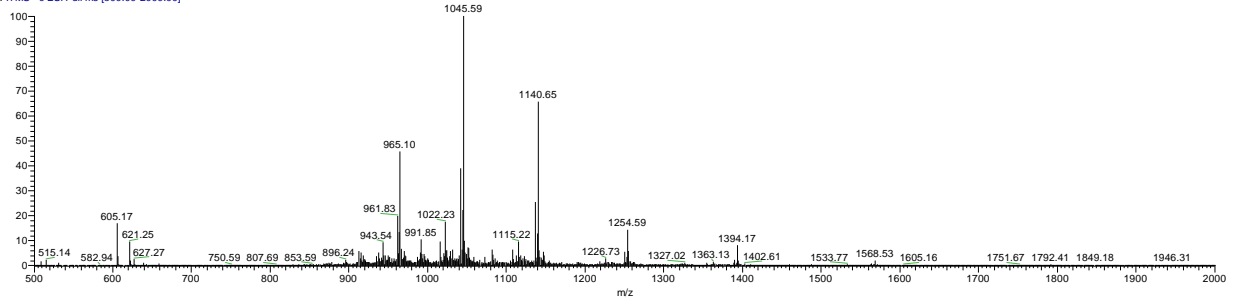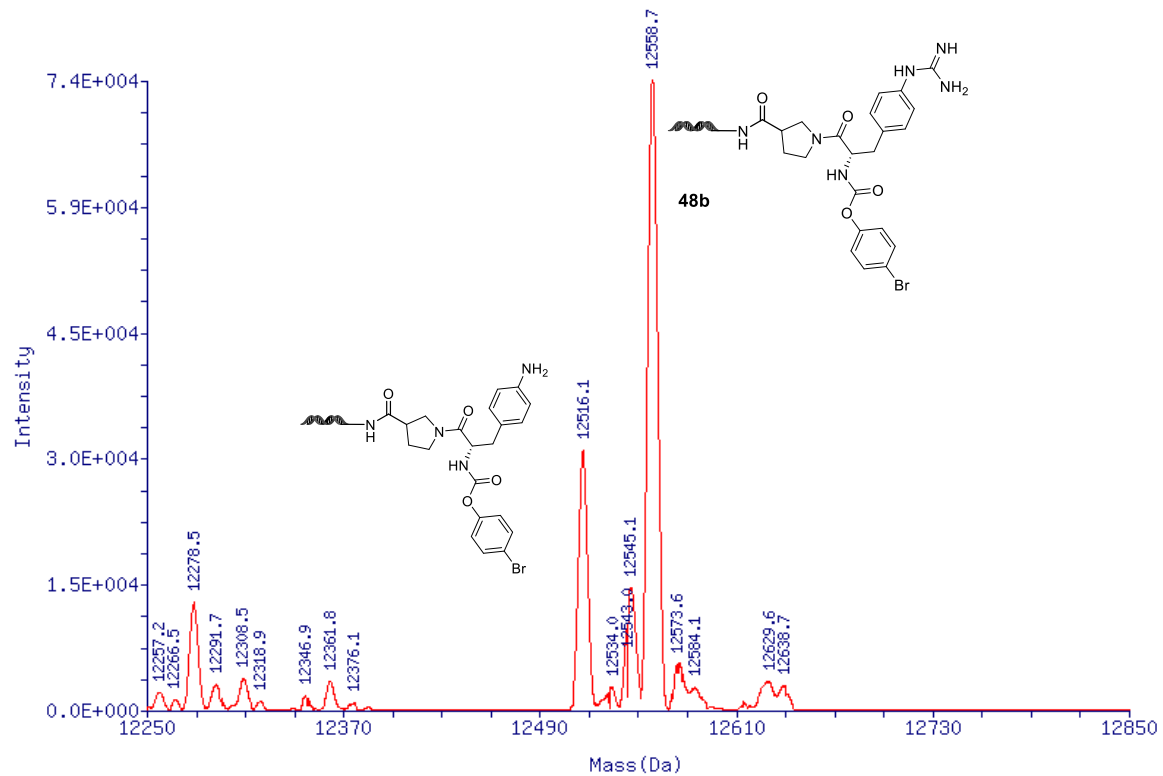

SD-II-42-3\_181220121850

9:30

RT: 0.00 - 2.00 SM: 7B

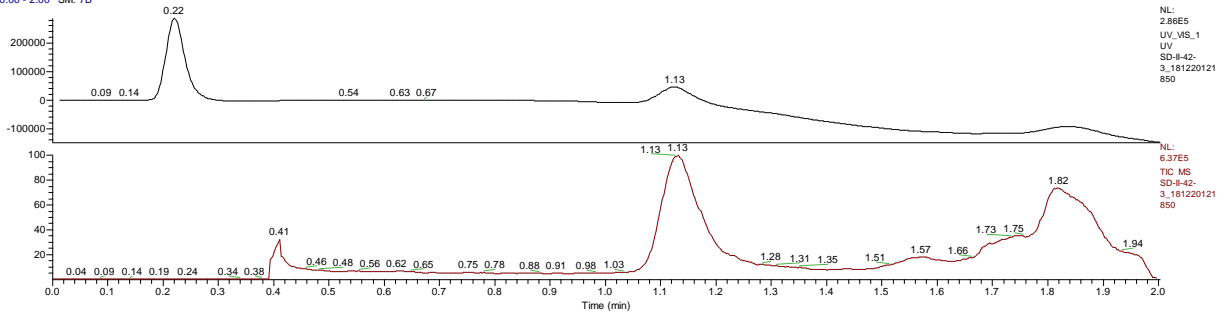

SD-II-42-3\_181220121850 #373-443 RT: 1.05-1.25 AV: 71 NL: 1.67E4  
T: FTMS - c ESI Full ms [500.00-2000.00]

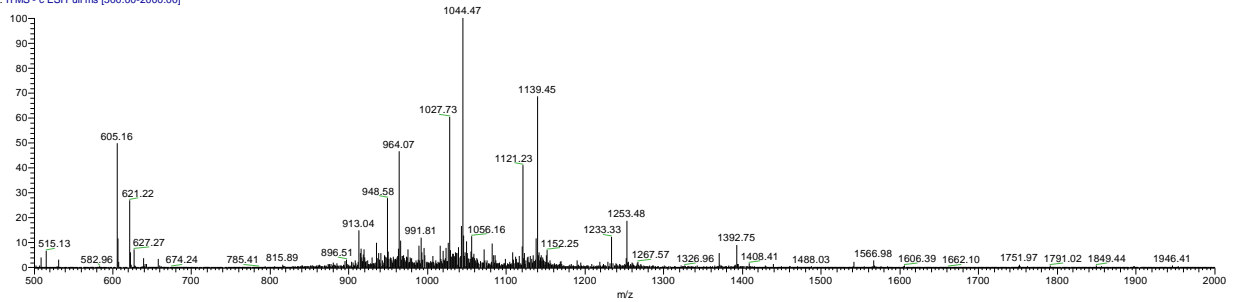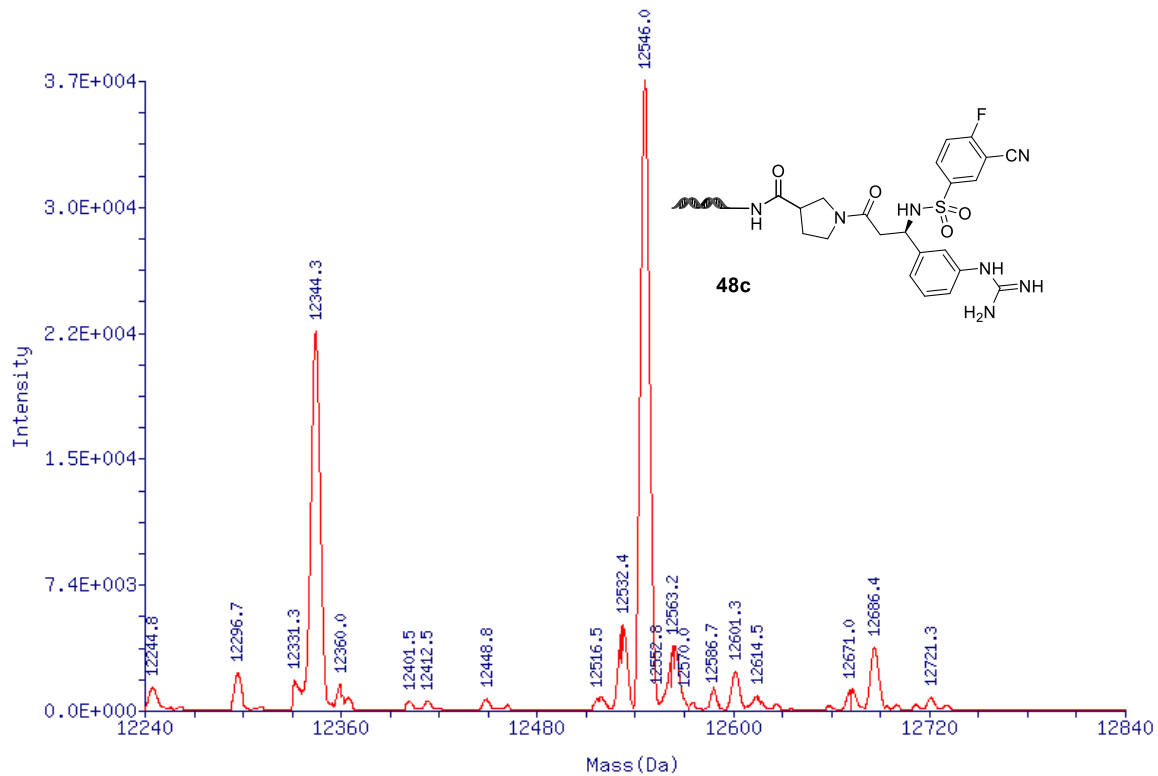

SD-II-42-4\_181220122135

2:15

RT: 0.00 - 2.00 SM: 7B

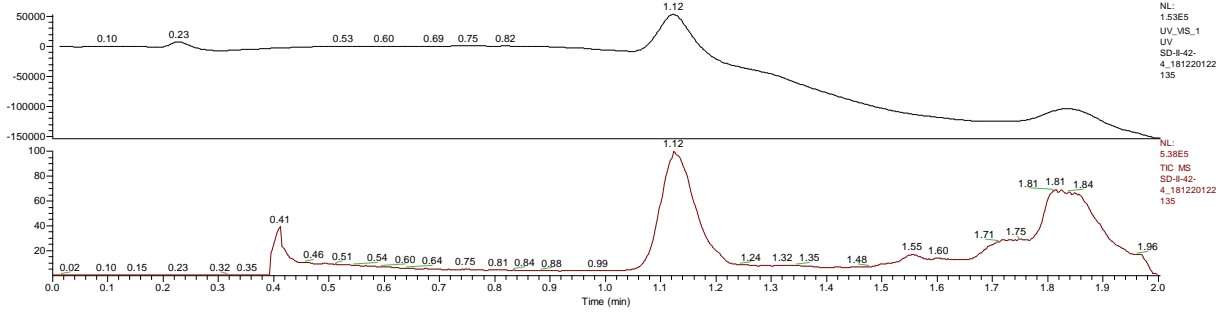

SD-II-42-4\_181220122135 #374-434 RT: 1.06-1.22 AV: 61 NL: 1.29E4  
T: FTMS - c ESI Full ms [500.00-2000.00]

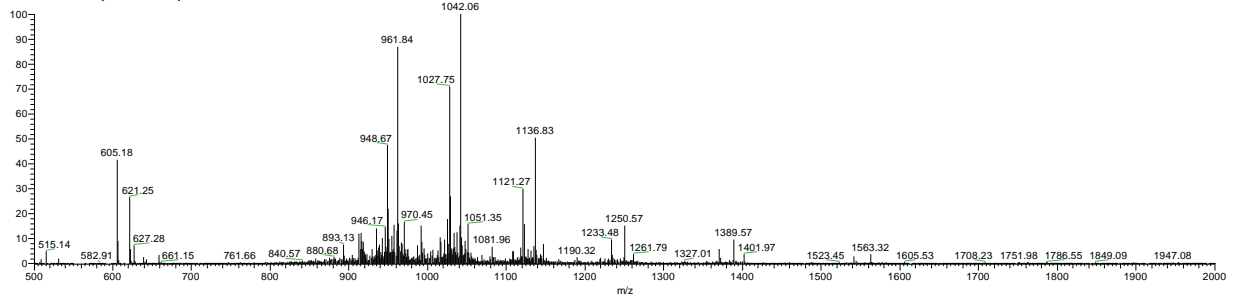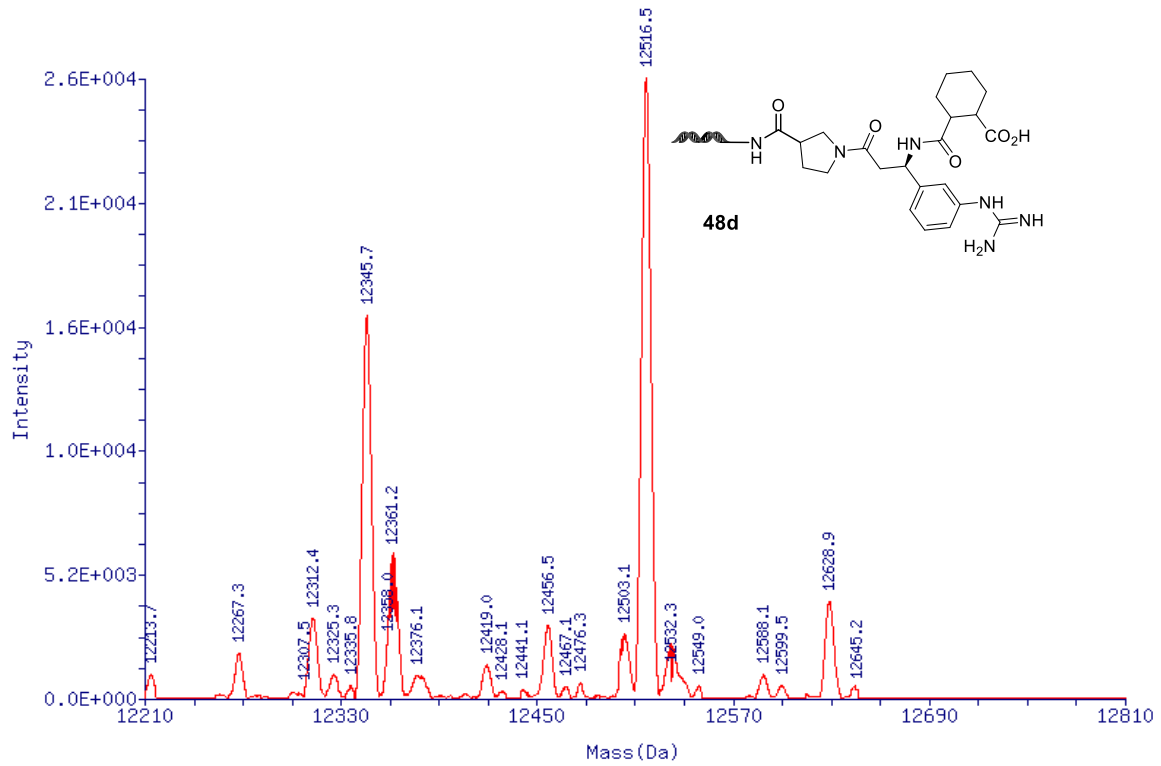



SD-II-42-5\_181220122420

5.00

RT: 0.00 - 2.00 SM: 7B

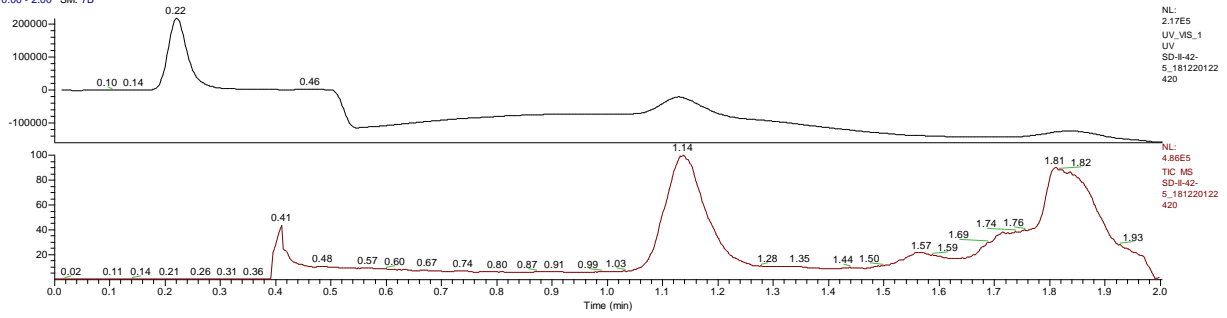

SD-II-42-5\_181220122420 #376-440 RT: 1.06-1.24 AV: 65 NL: 9.61E3  
T: FTMS - c ESI Full ms [500.00-2000.00]

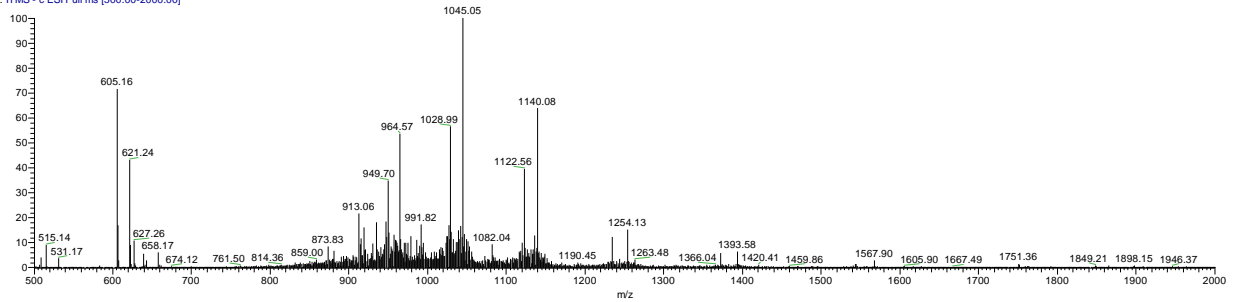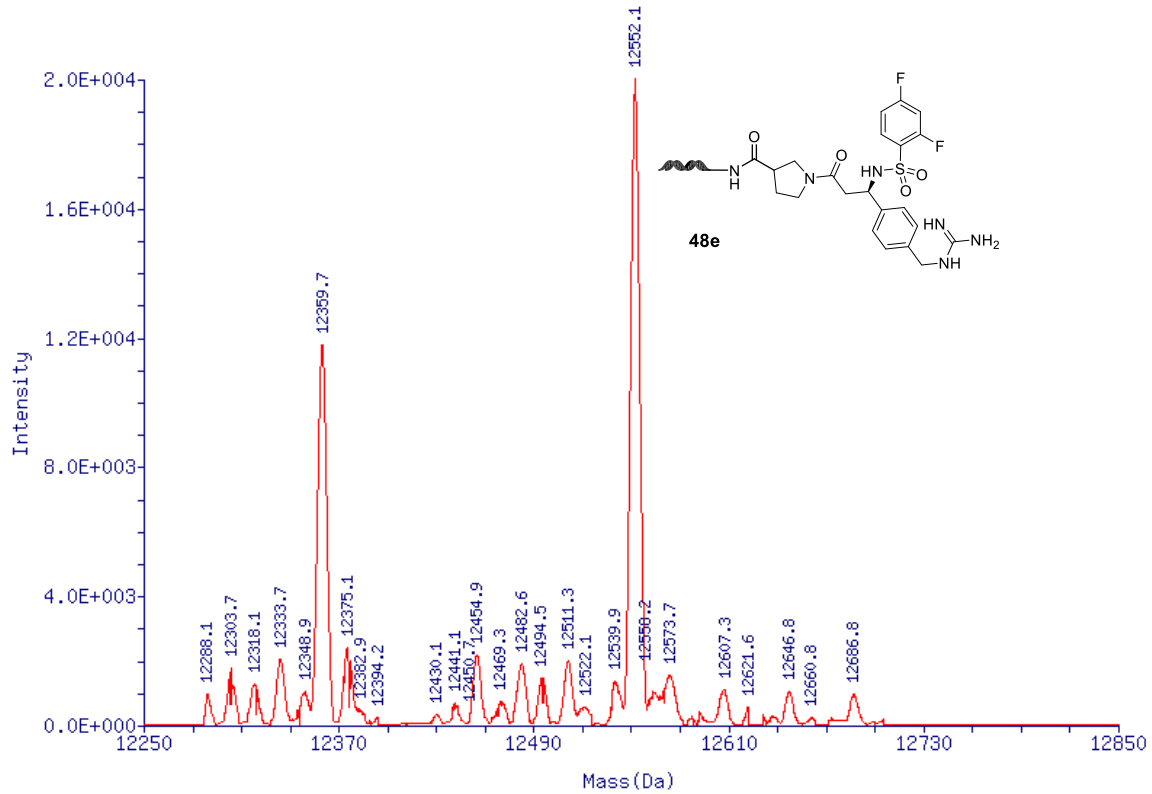

SD-II-42-6\_181220122705

7.45

RT: 0.00 - 2.00 SM: 7B

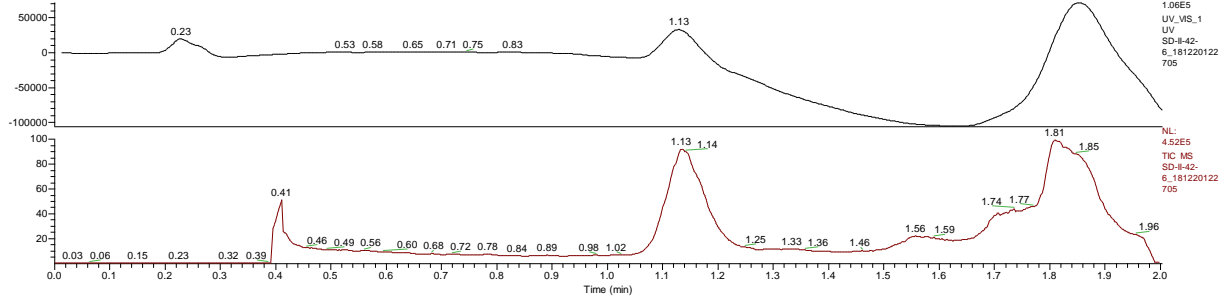

SD-II-42-6\_181220122705 #375-443 RT: 1.06-1.25 AV: 69 NL: 7.06E3  
T: FTMS - c ESI Full ms [500.00-2000.00]

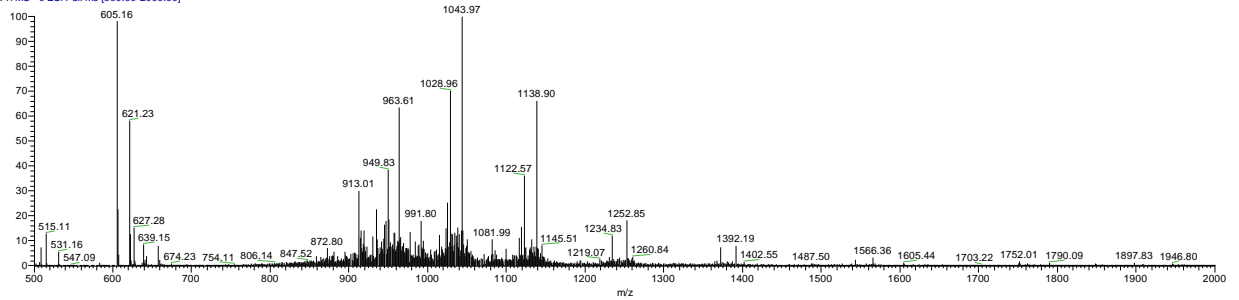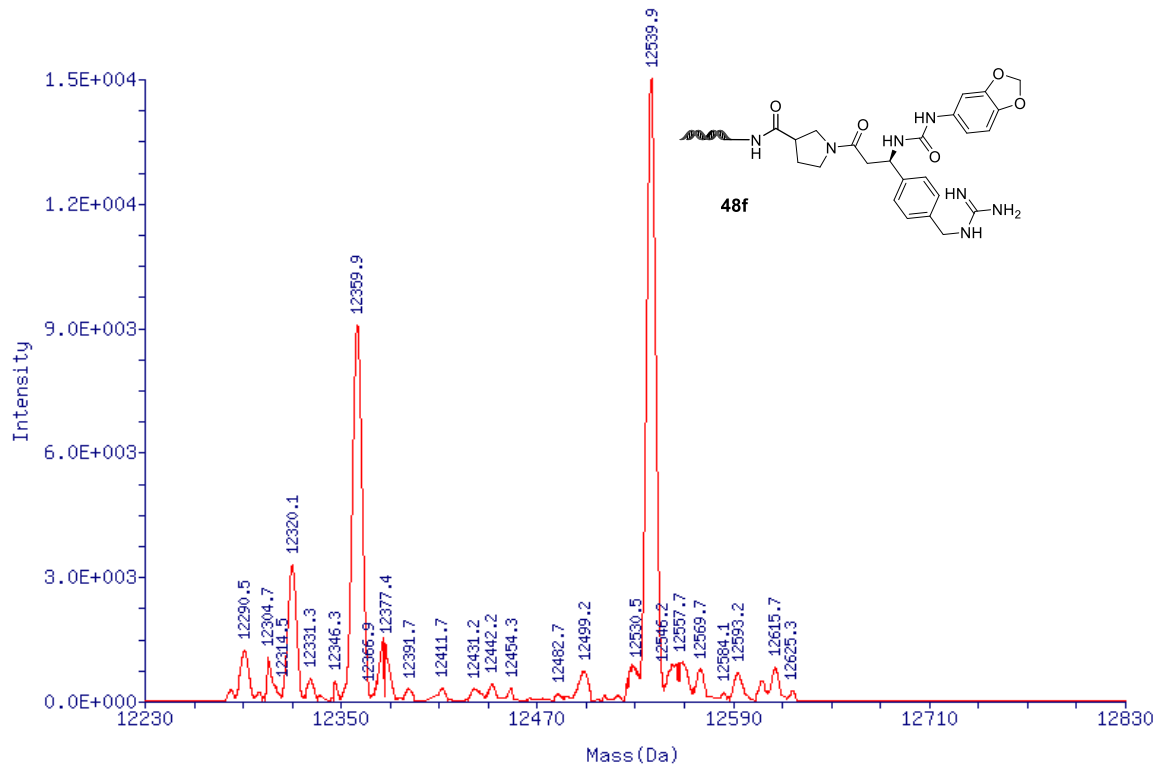

SD-II-42-7\_181220122950

0:30

RT: 0.00 - 2.00 SM: 7B

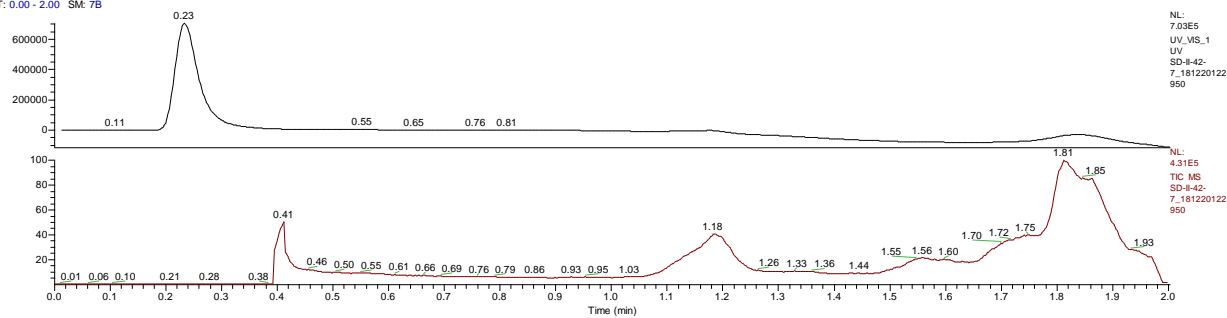

NL: 7.03E6  
UV\_MS\_1  
UV  
SD-II-42-7\_181220122  
950  
NL: 4.31E5  
TIC MS  
SD-II-42-7\_181220122  
950

SD-II-42-7\_181220122950 #382-450 RT: 1.08-1.27 AV: 69 NL: 6.52E3  
T: FTMS - c ESI Full ms [500.00-2000.00]

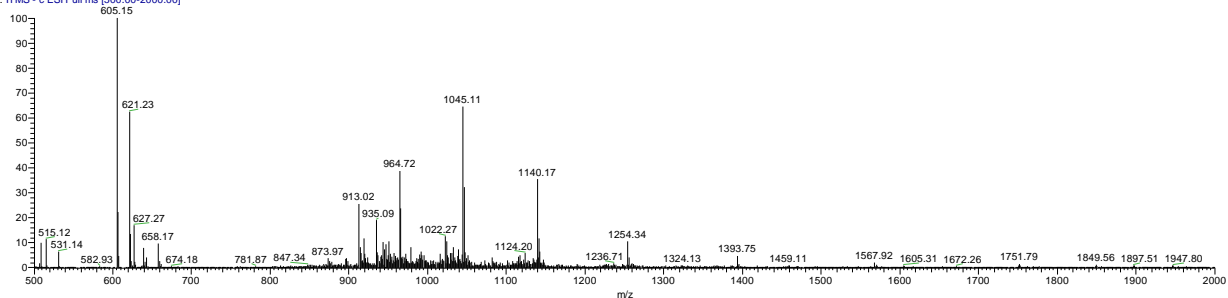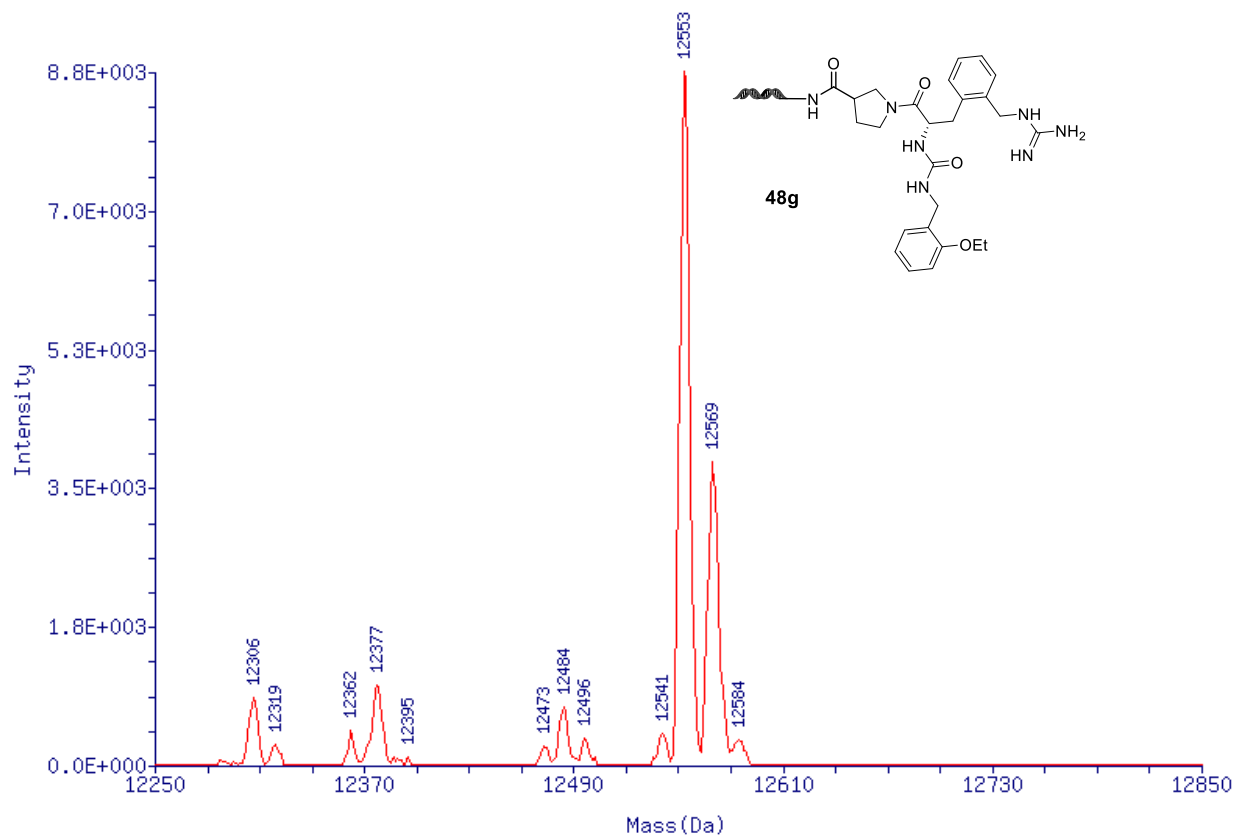

SD-II-42-8\_181220123235

3:15

RT: 0.00 - 2.00 SM: 7B

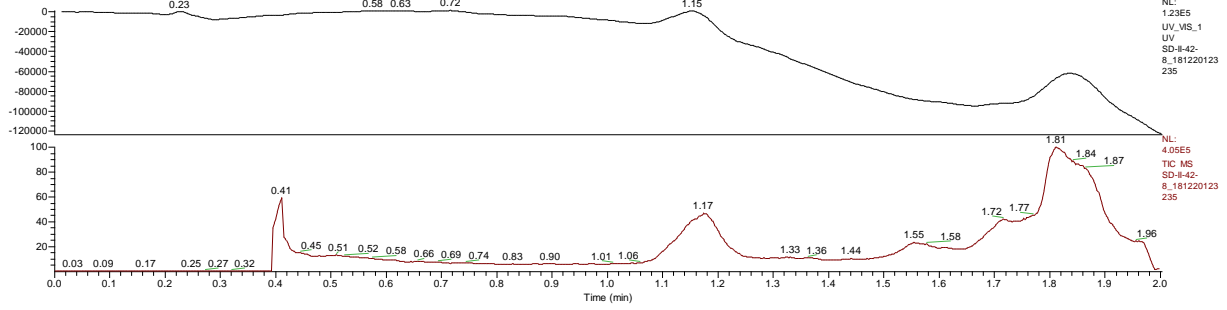

SD-II-42-8\_181220123235 #384-442 RT: 1.08-1.25 AV: 59 NL: 8.02E3  
T: FTMS - c ESI Full ms [500.00-2000.00]

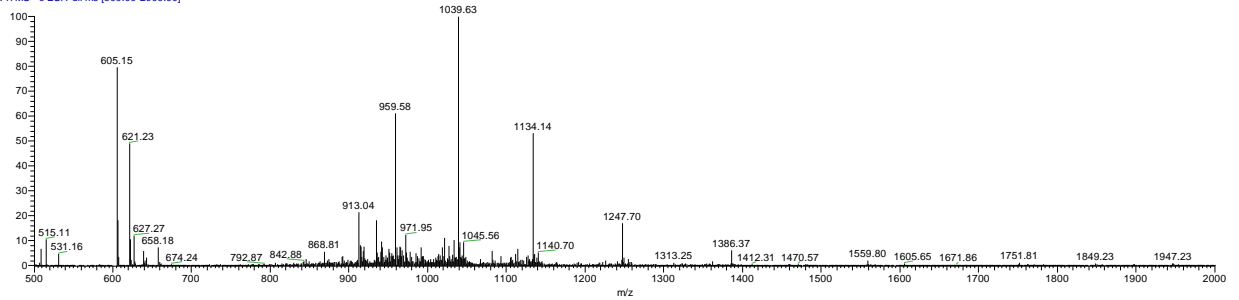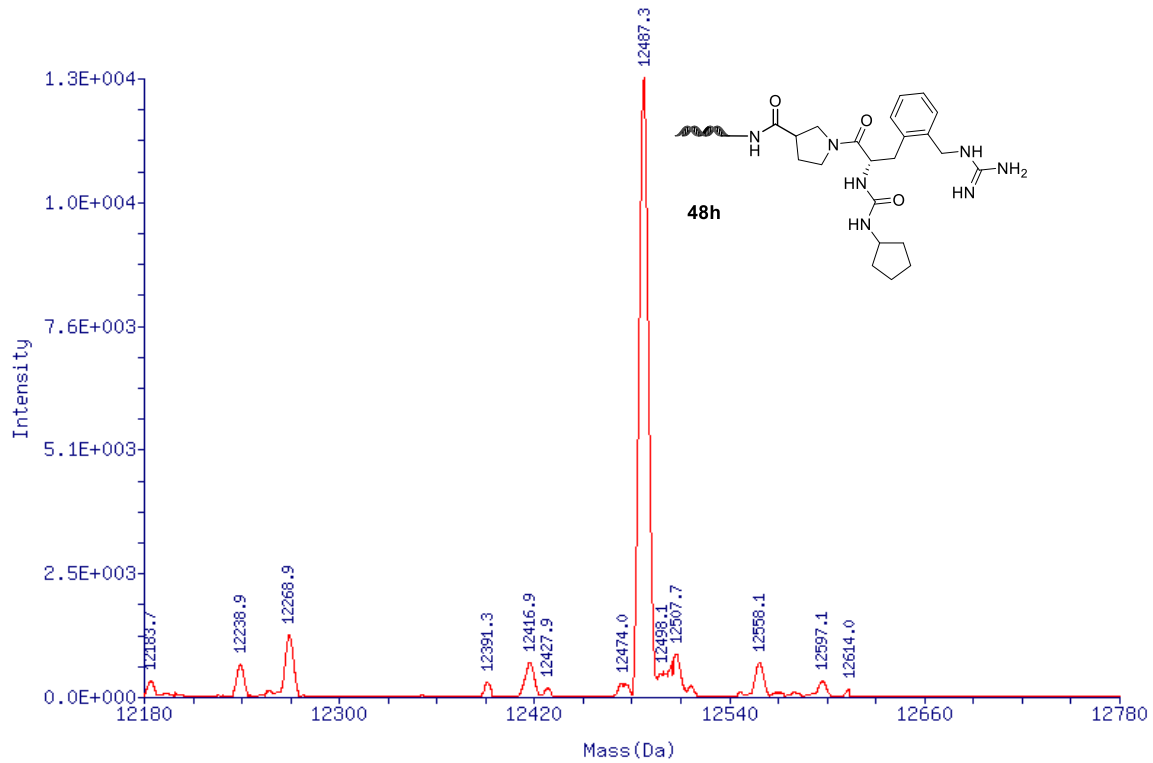

SD-II-42-9\_181220123518

5:58

RT: 0.00 - 2.00 SM: 7B

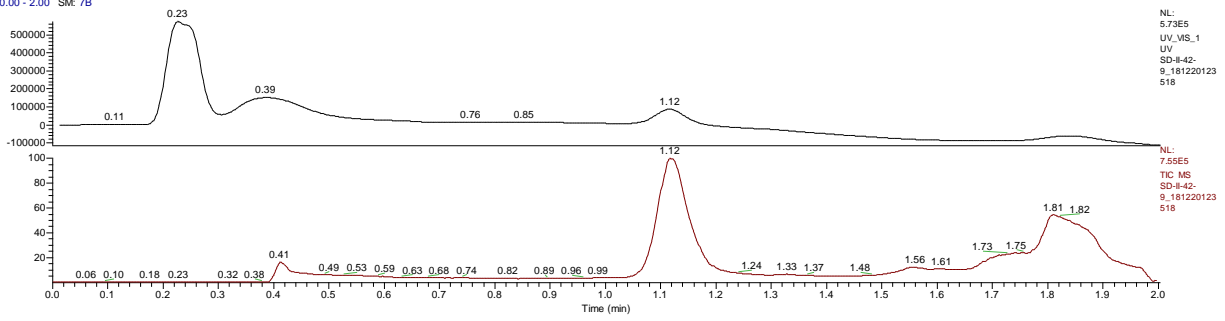

SD-II-42-9\_181220123518 #373-425 RT: 1.05-1.20 AV: 53 NL: 1.97E4  
T: FTMS - c ESI Full ms [500.00-2000.00]

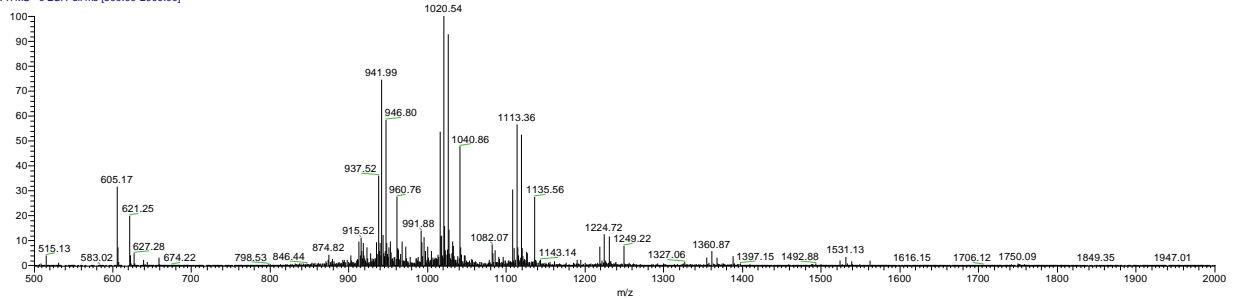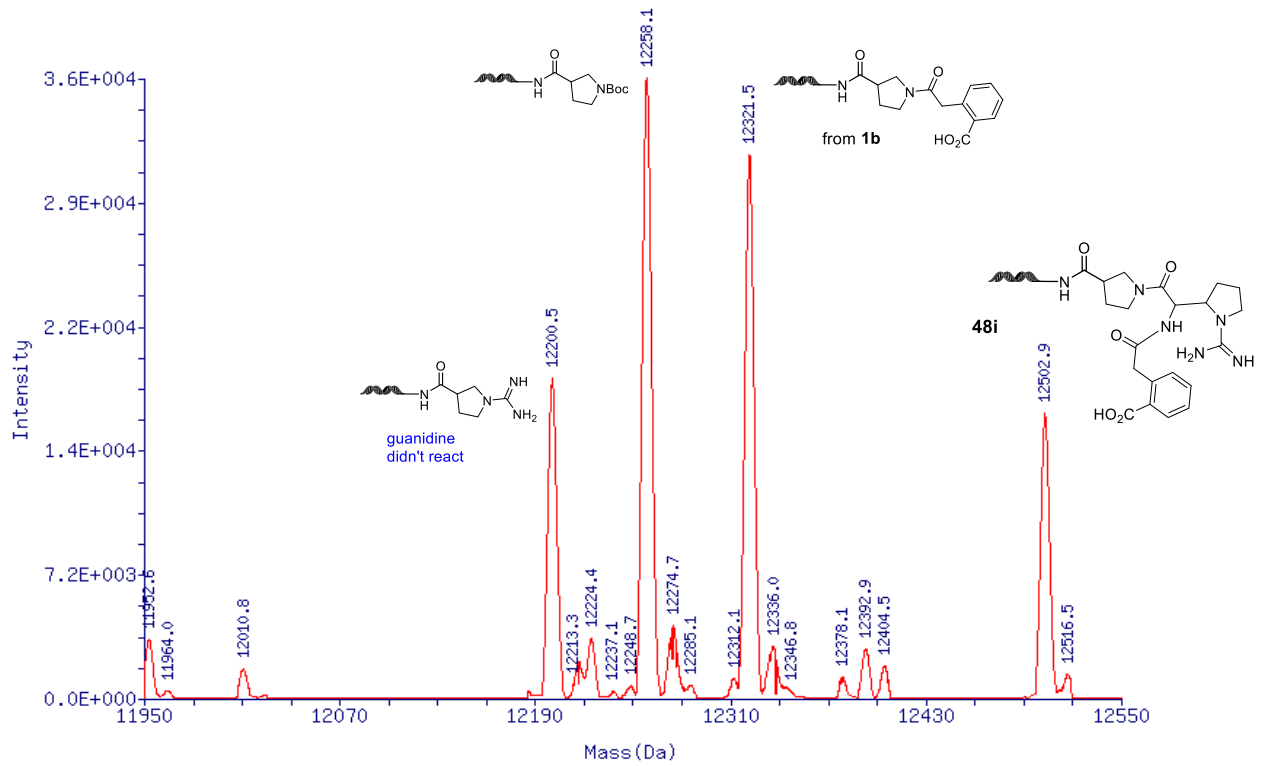

SD-II-42-10\_181220123805

8.43

RT: 0.00 - 2.00 SM: 7B

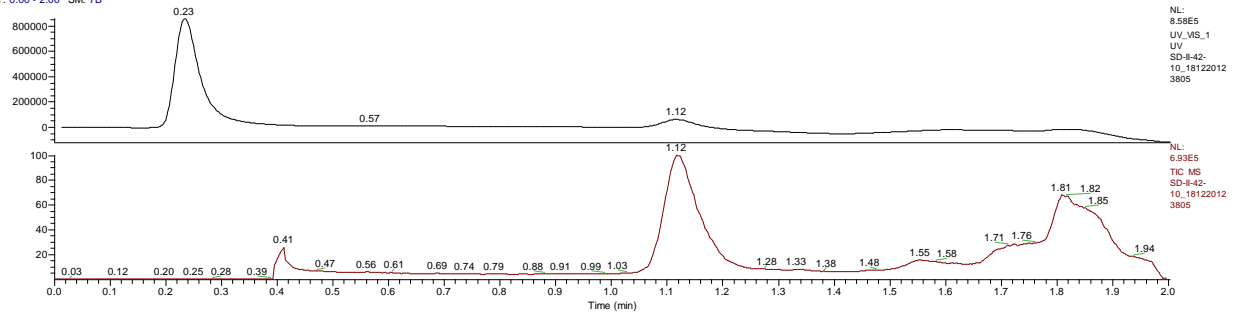

SD-II-42-10\_181220123805 #373-430 RT: 1.05-1.21 AV: 58 NL: 2.00E4  
T: FTMS - c ESI Full ms [500.00-2000.00]

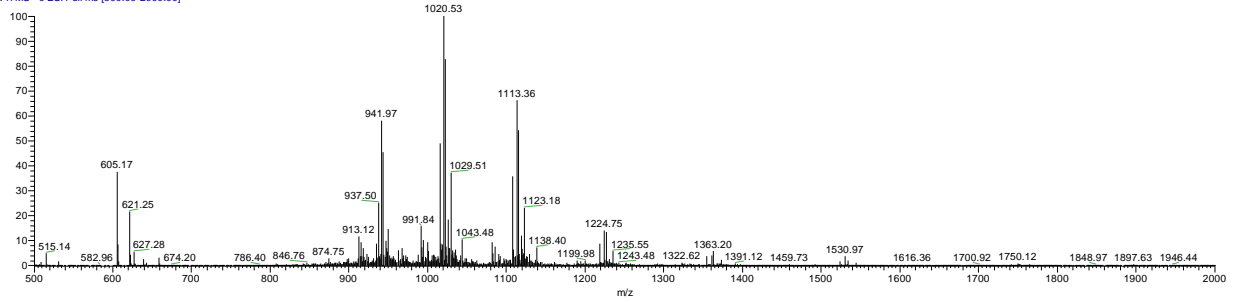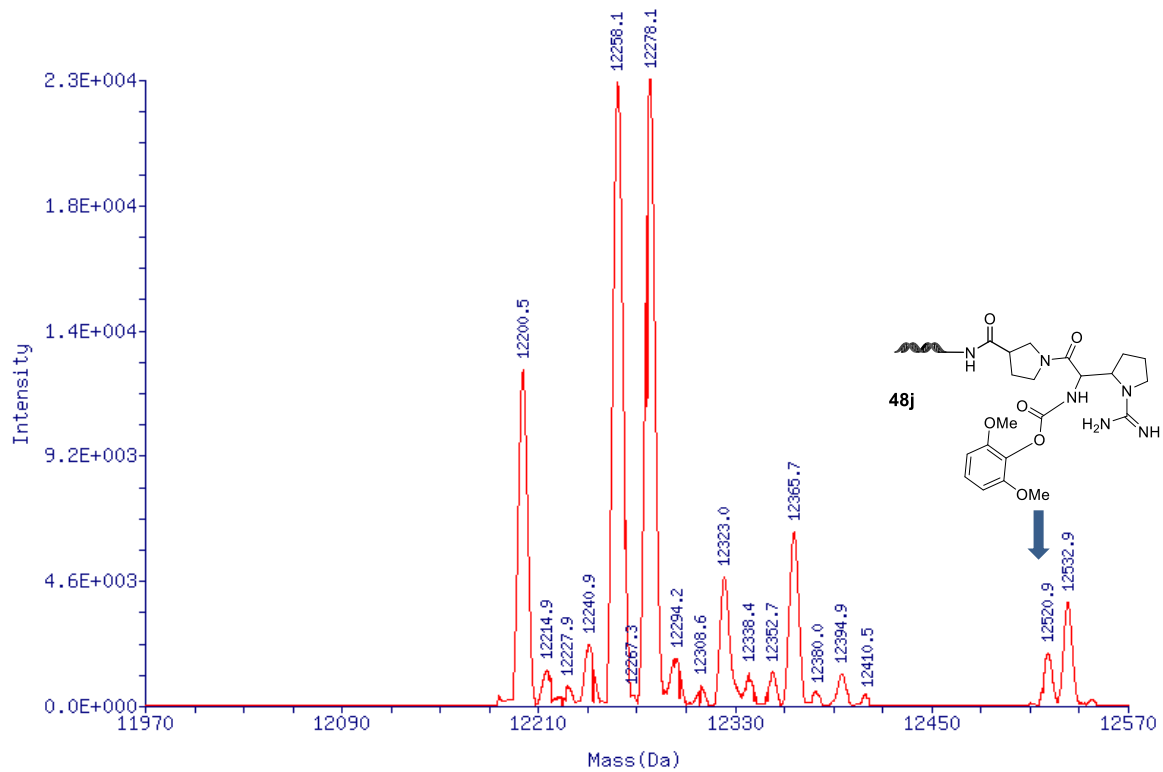

RT: 0.00 - 2.00 SM: 7B

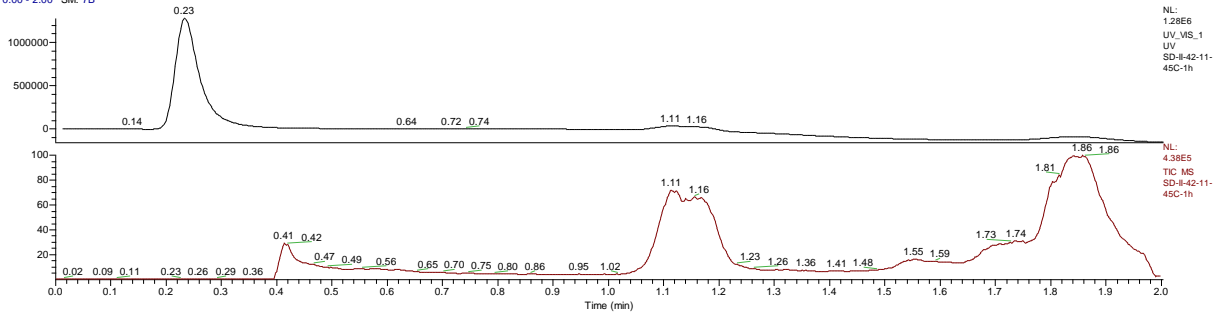

SD-II-42-11-45C-1h #377-441 RT: 1.06-1.24 AV: 65 NL: 1.65E4  
T: FTMS - c ESI Full ms [500.00-2000.00]

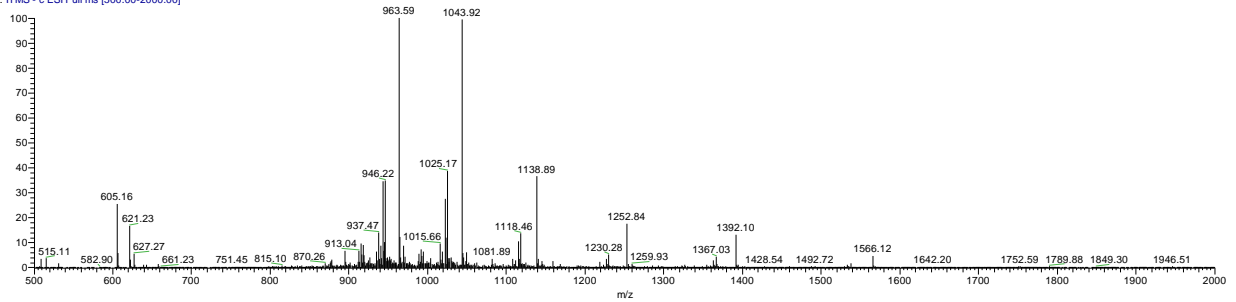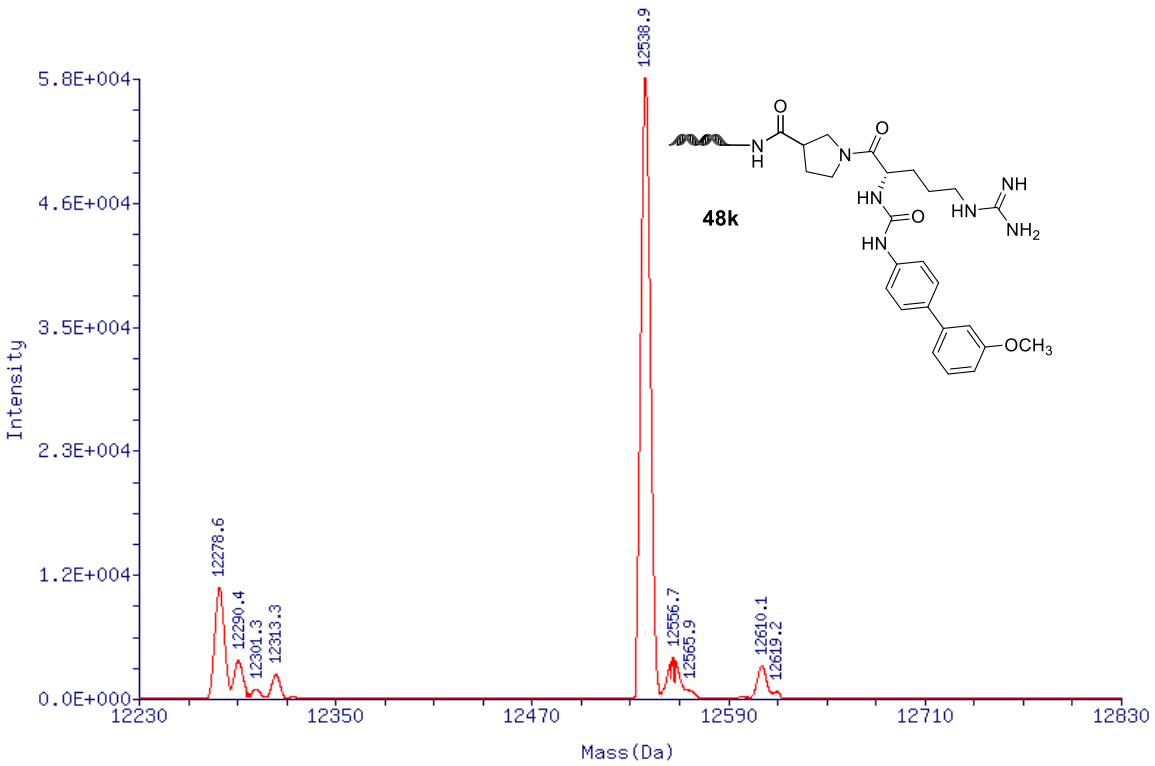

SD-II-42-12\_181220124333

4.13

RT: 0.00 - 2.00 SM: 7B

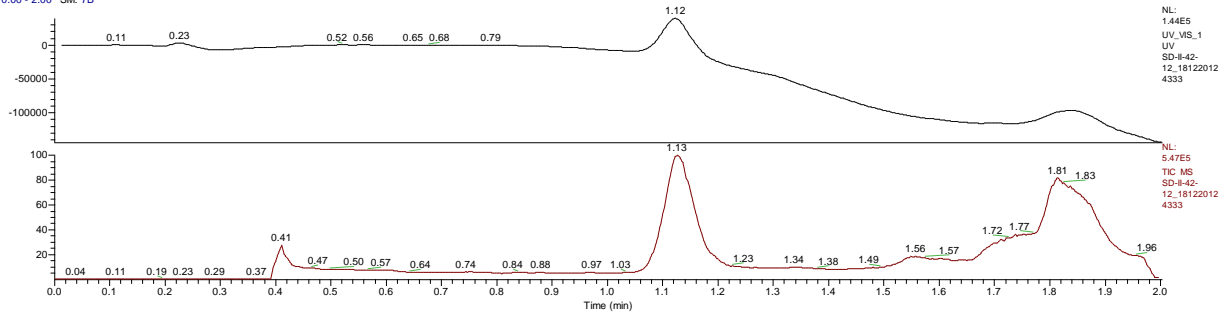

SD-II-42-12\_181220124333 #376-436 RT: 1.06-1.23 AV: 61 NL: 3.11E4  
T: FTMS - c ESI Full ms [500.00-2000.00]

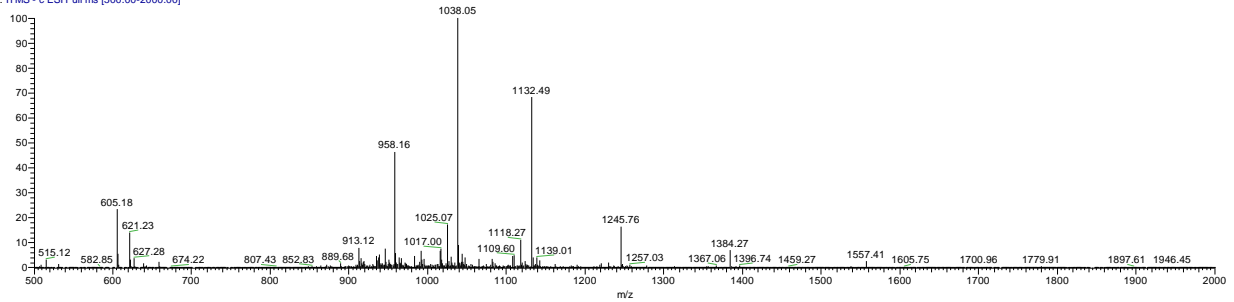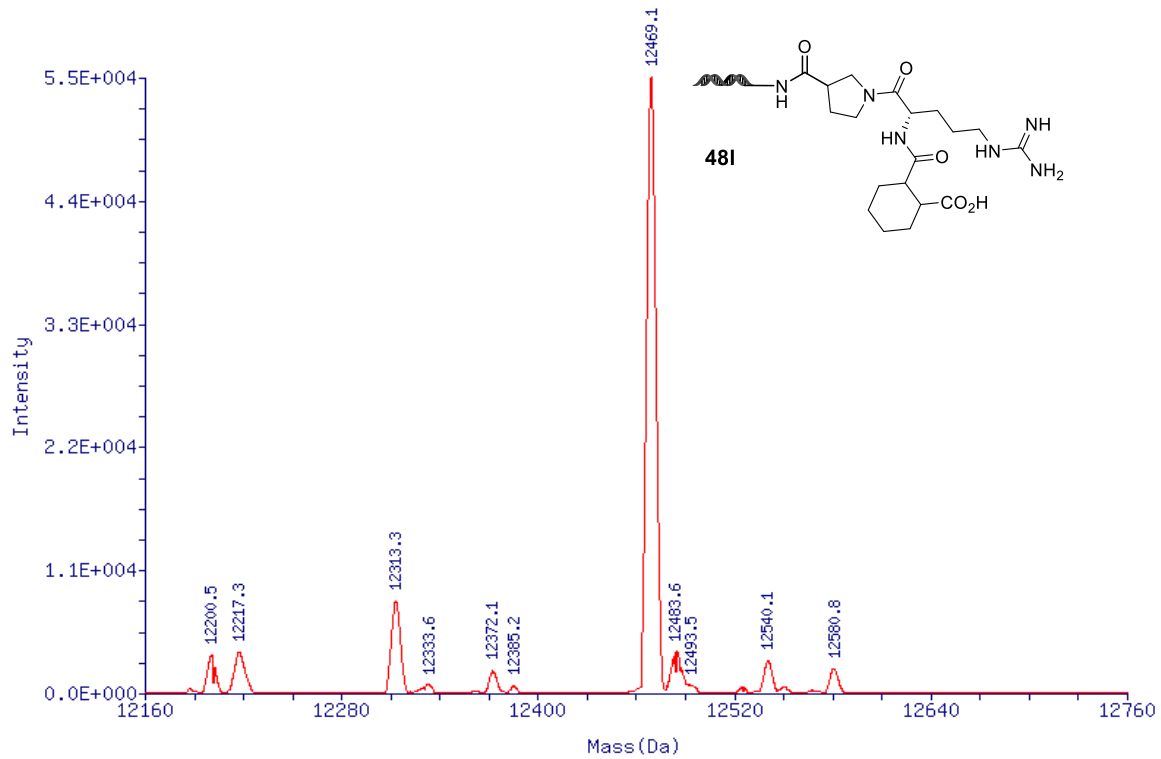



## 7e) On-DNA re-synthesis of hits

SD-II-127-deBoc-2\_190502'

8.00

qDOS19\_1a\_A1

RT: 0.00 - 2.00 SM: 7B

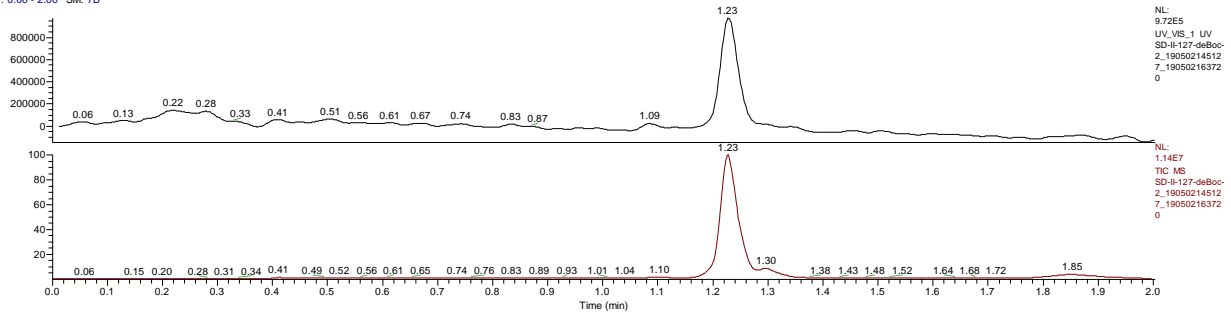

SD-II-127-deBoc-2\_190502145127\_190502163720 #416-474 RT: 1.17-1.33 AV: 59 NL: 6.66E5  
T: FTMS - c ESI Full ms [500.00-2000.00]

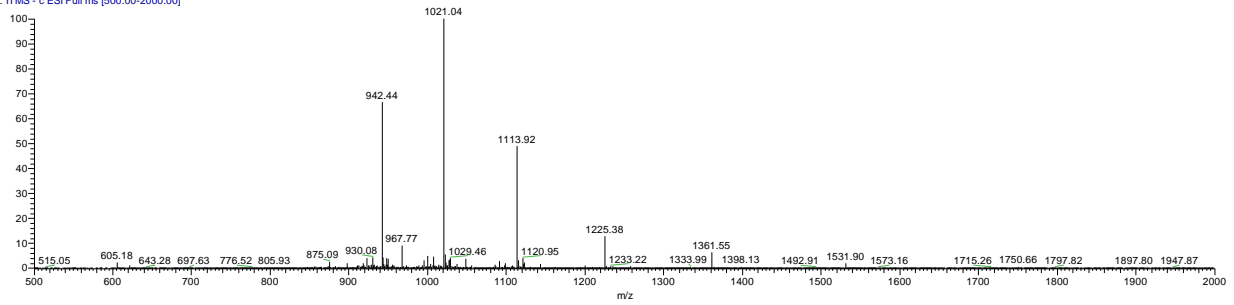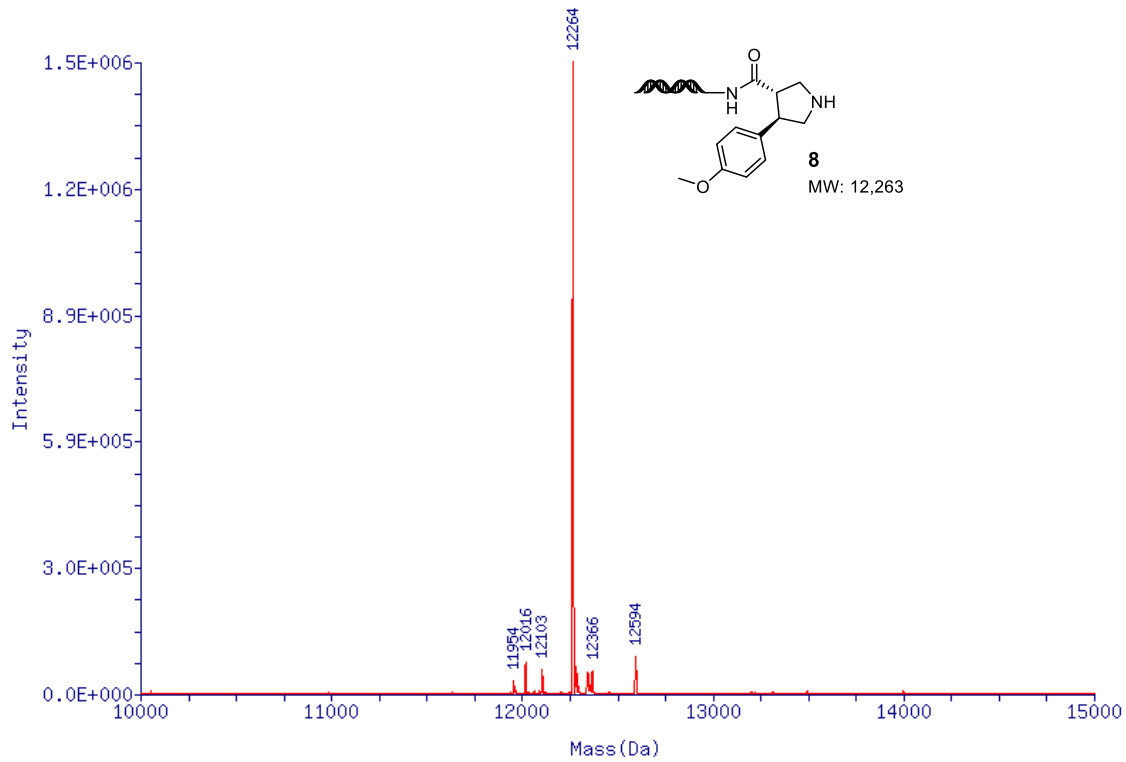

RT: 0.00 - 2.00 SM: 7B

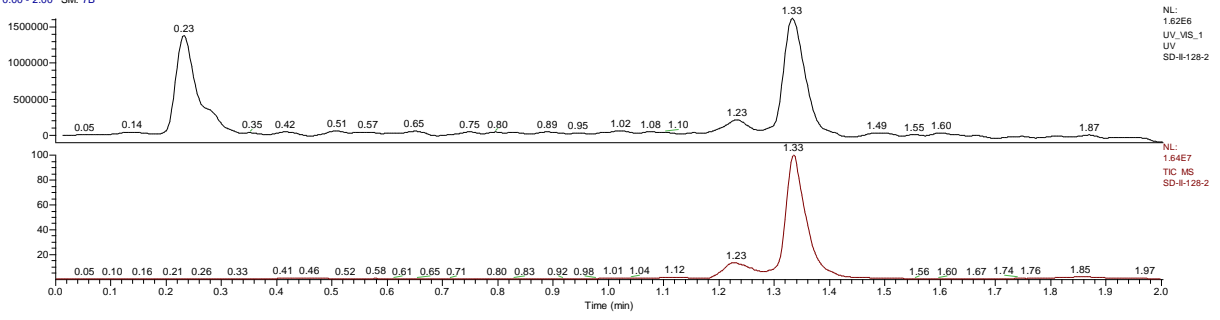

SD-II-128-2 #436-501 RT: 1.23-1.40 AV: 66 NL: 8.33E5  
T: ITMS - c ESI Full ms [500.00-2000.00]

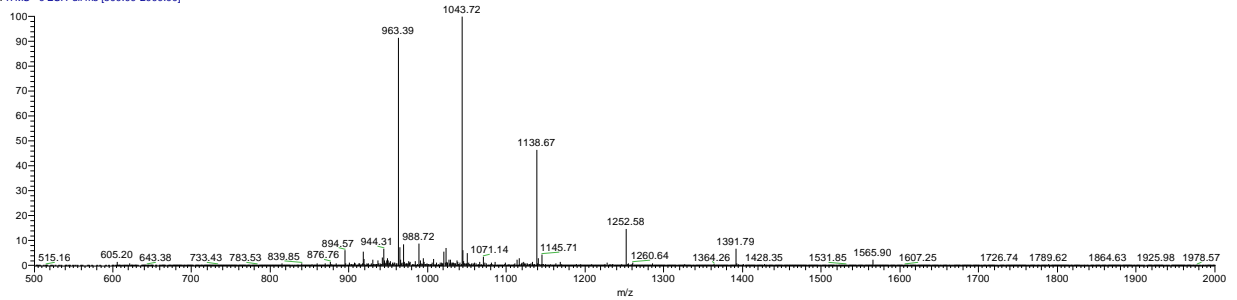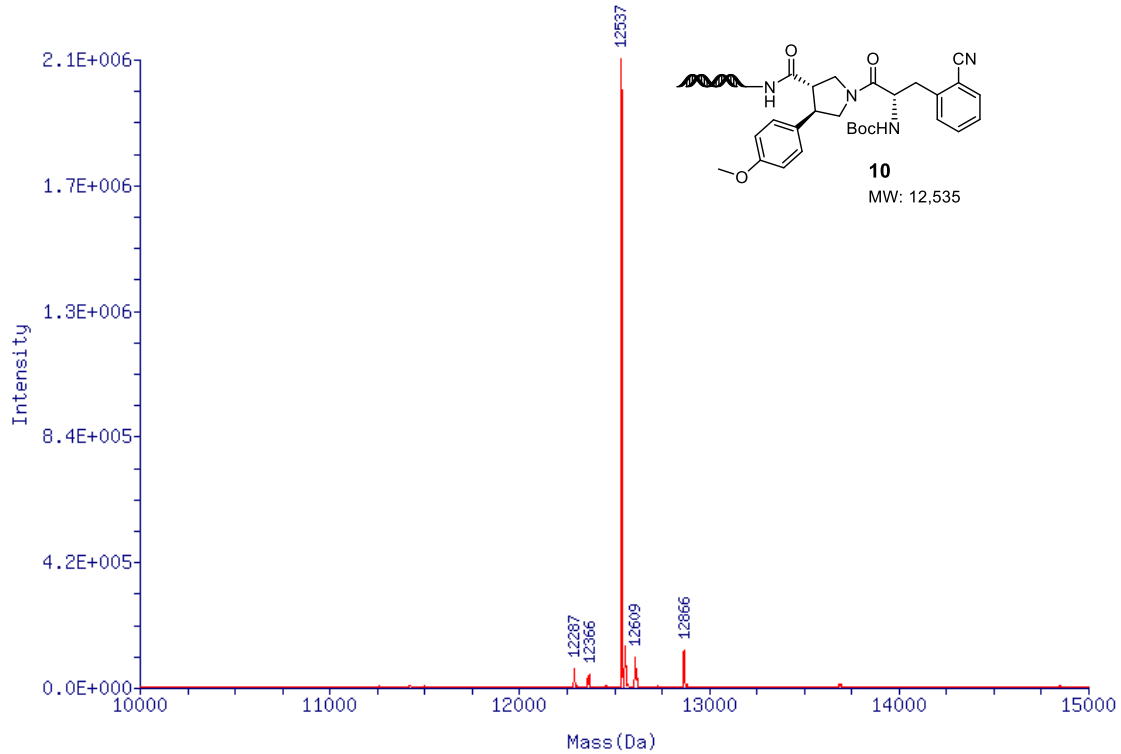

SD-II-129-2\_190506161912

0:00

qDOS19\_1a\_A1

RT: 0.00 - 2.00 SM: 7B

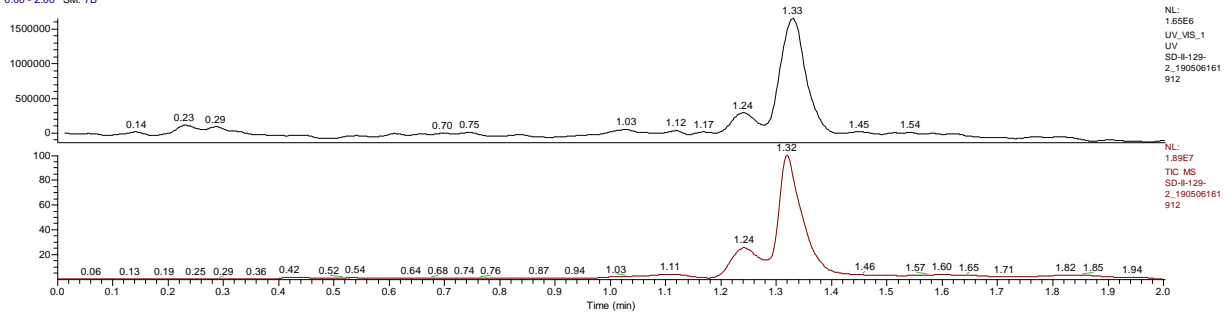

SD-II-129-2\_190506161912 #431-507 RT: 1.22-1.42 AV: 77 NL: 8.58E5  
T: ITMS - c ESI Full ms [500.00-2000.00]

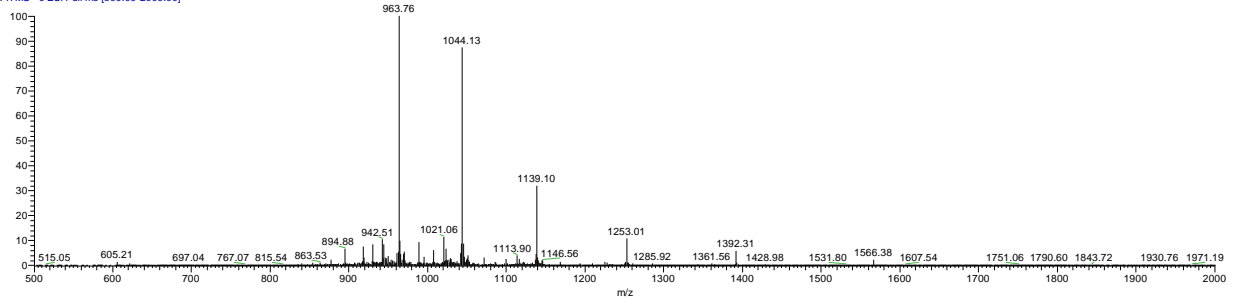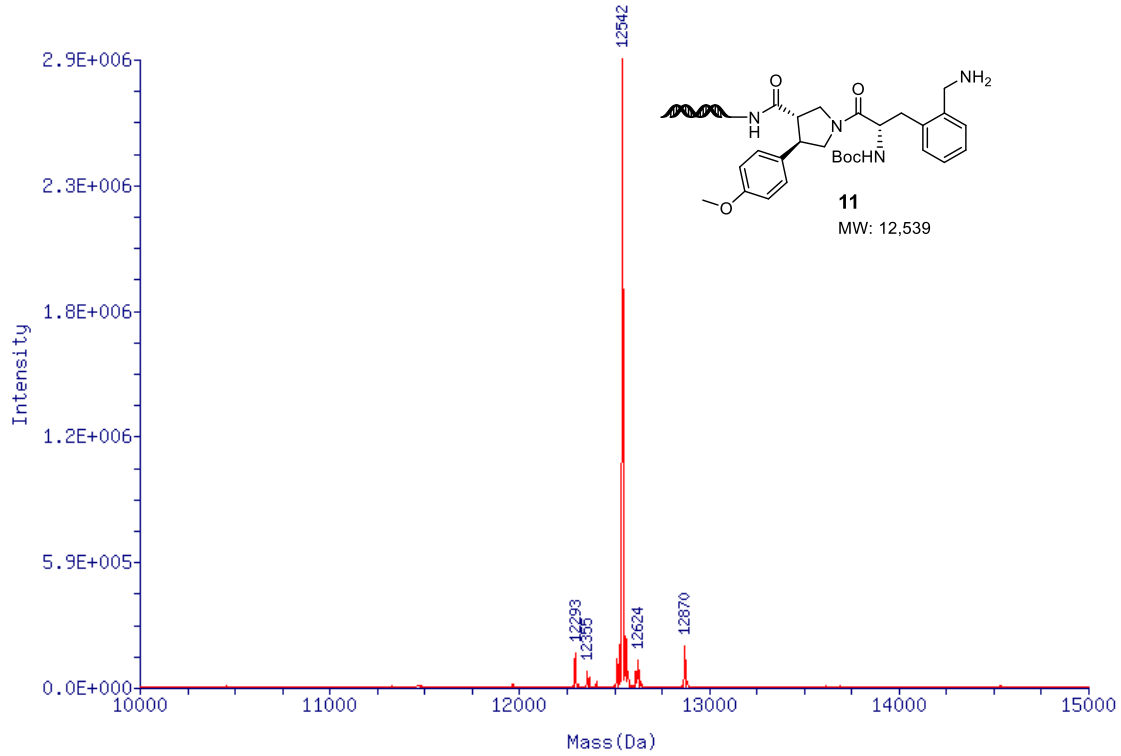

RT: 0.00 - 2.00 SM: 7B

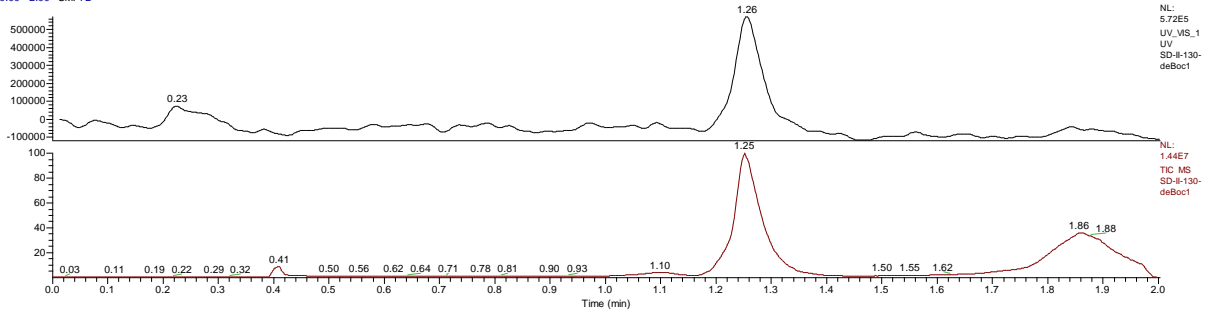

SD-II-130-deBoc1 #437-459 RT: 1.23-1.29 AV: 23 NL: 1.05E6  
T: ITMS - c ESI Full ms [500.00-2000.00]

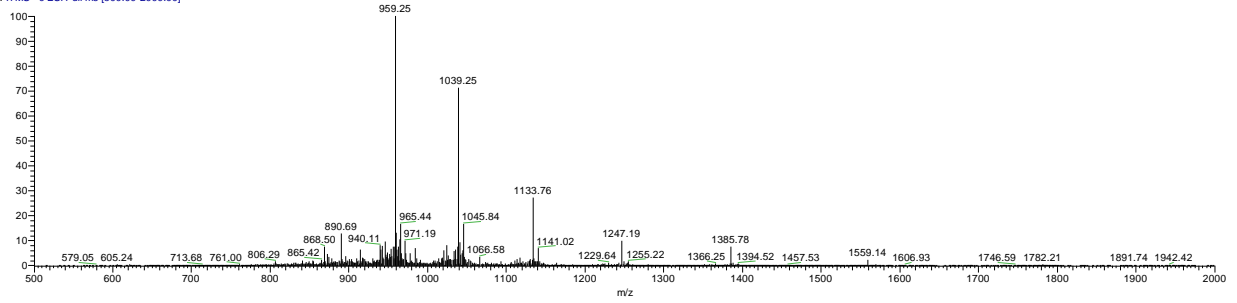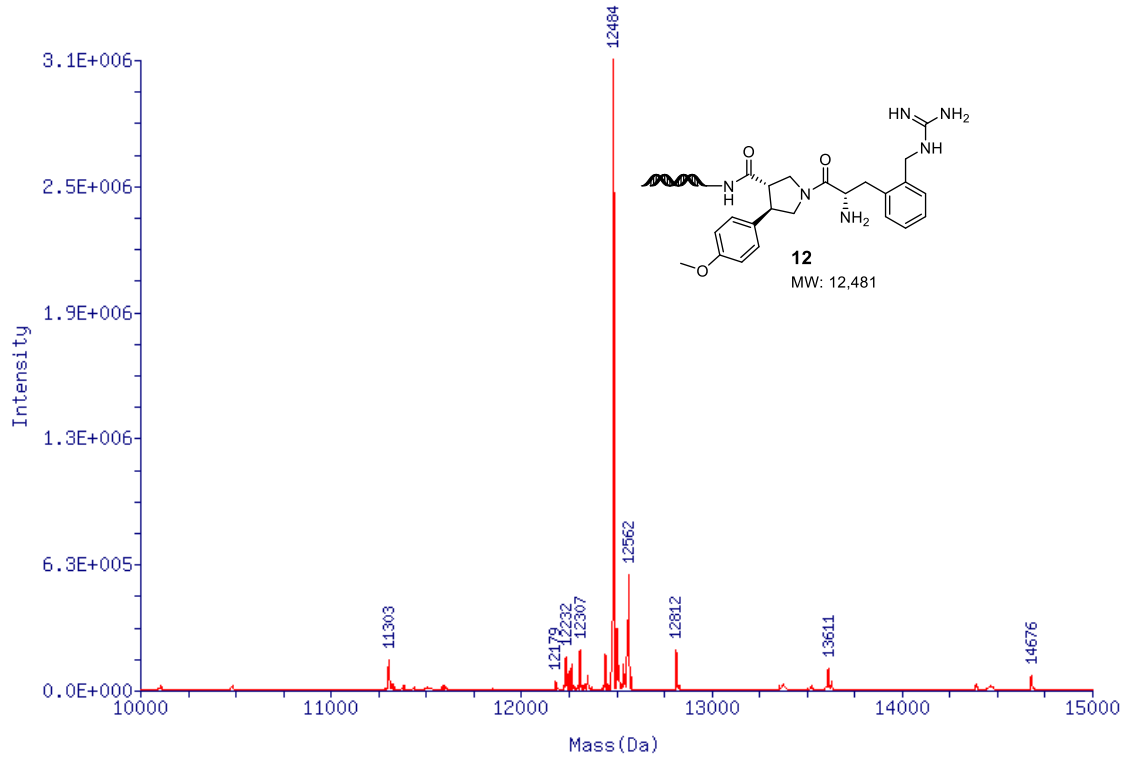

SD-II-131-urea-1\_19051613

0:24

qDOS19\_1a\_A1

RT: 0.00 - 2.00 SM: 7B

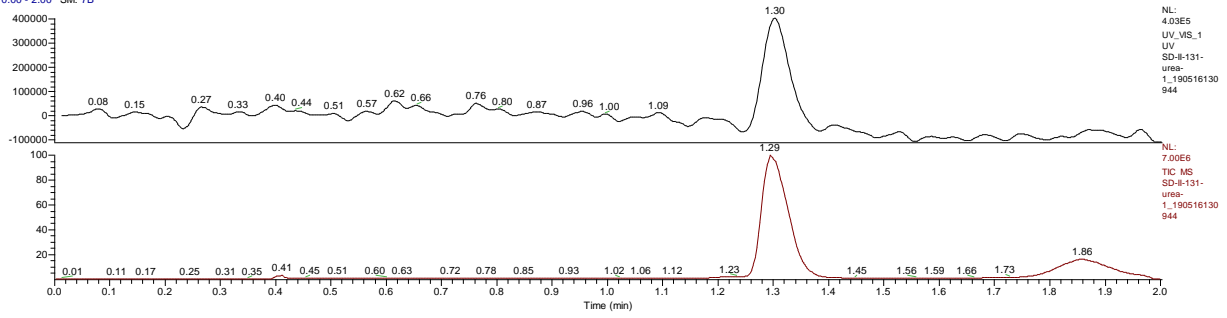

SD-II-131-urea-1\_190516130944 #439-508 RT: 1.24-1.43 AV: 70 NL: 1.84E5  
T: FTMS - c ESI Full ms [500.00-2000.00]

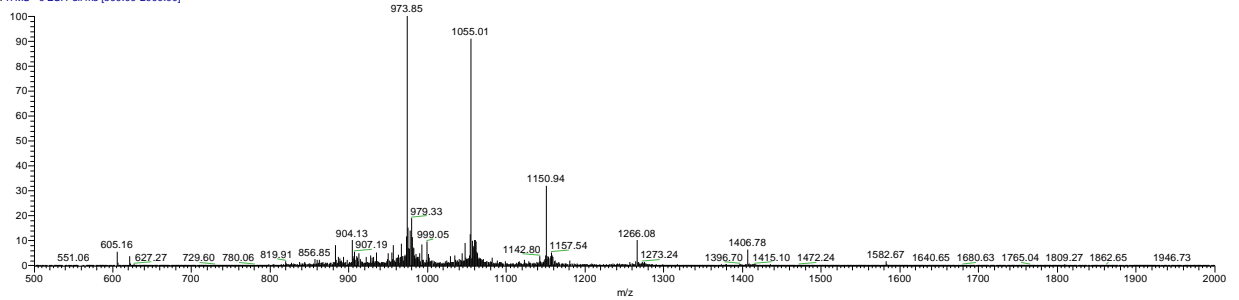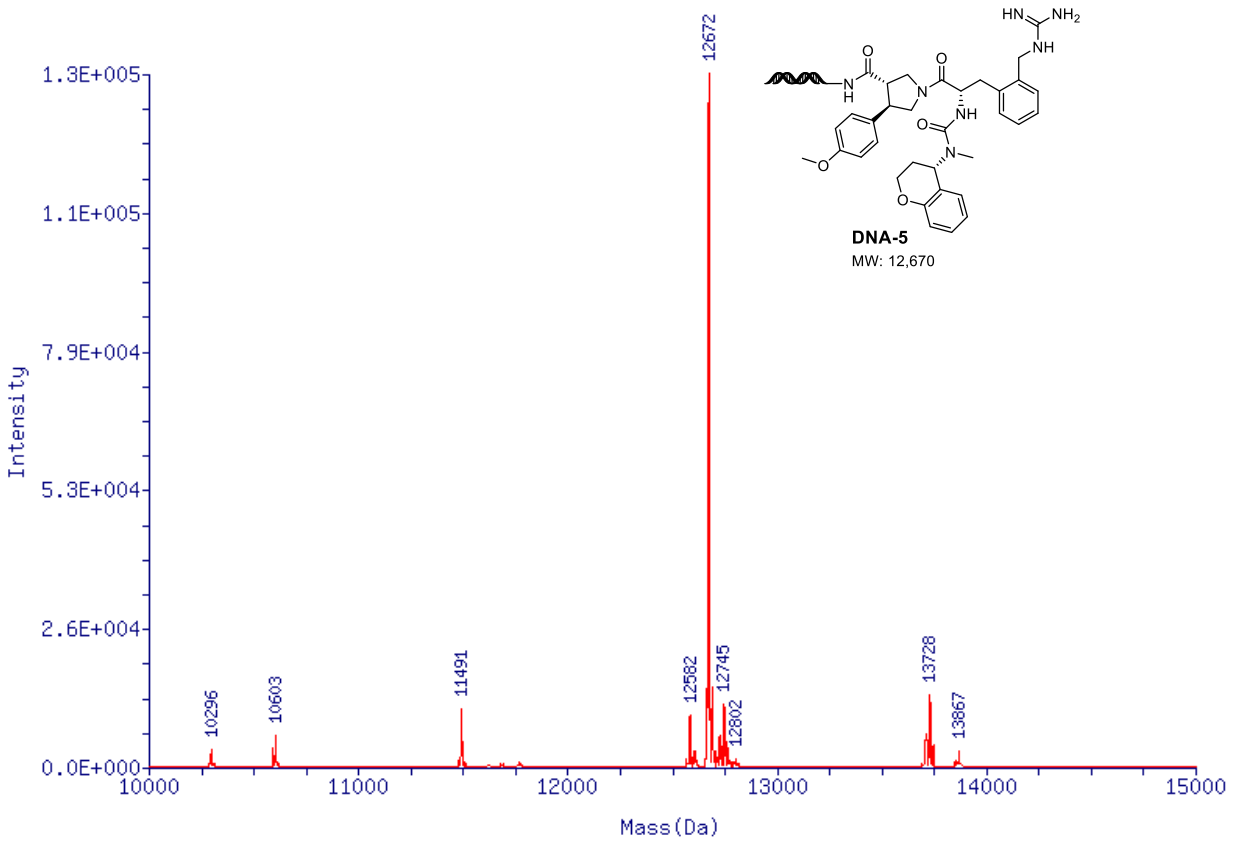

RT: 0.00 - 2.00 SM: 7B

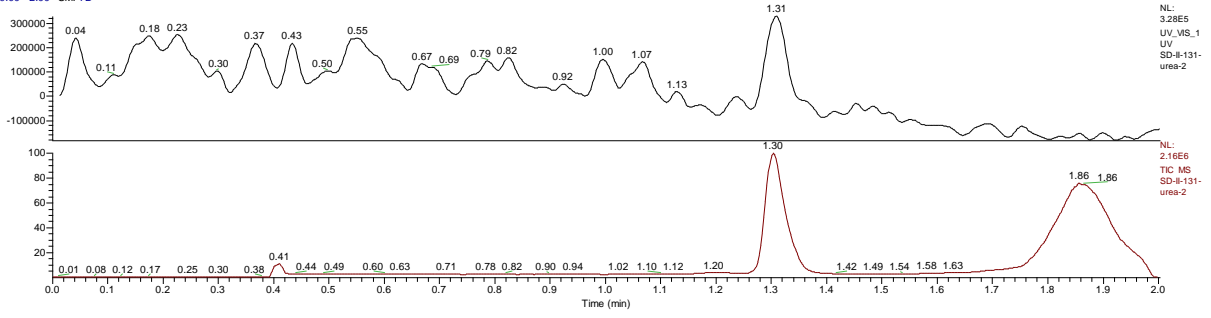

SD-II-131-urea-2 #446-489 RT: 1.26-1.38 AV: 44 NL: 8.91E4  
T: ITMS - c ESI Full ms [500.00-2000.00]

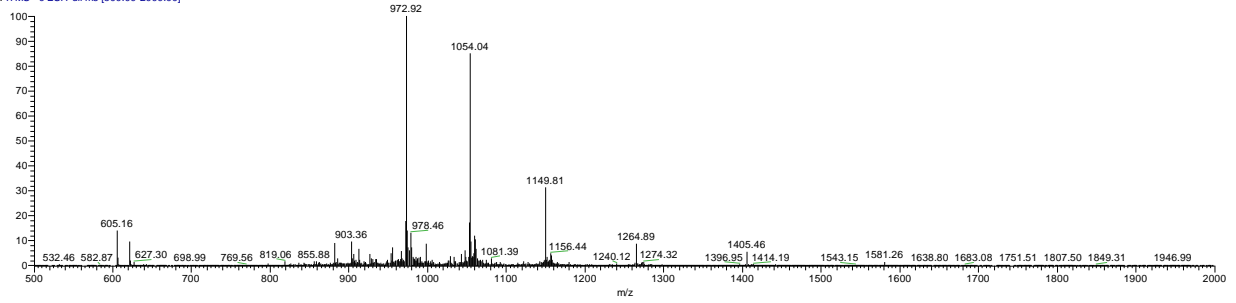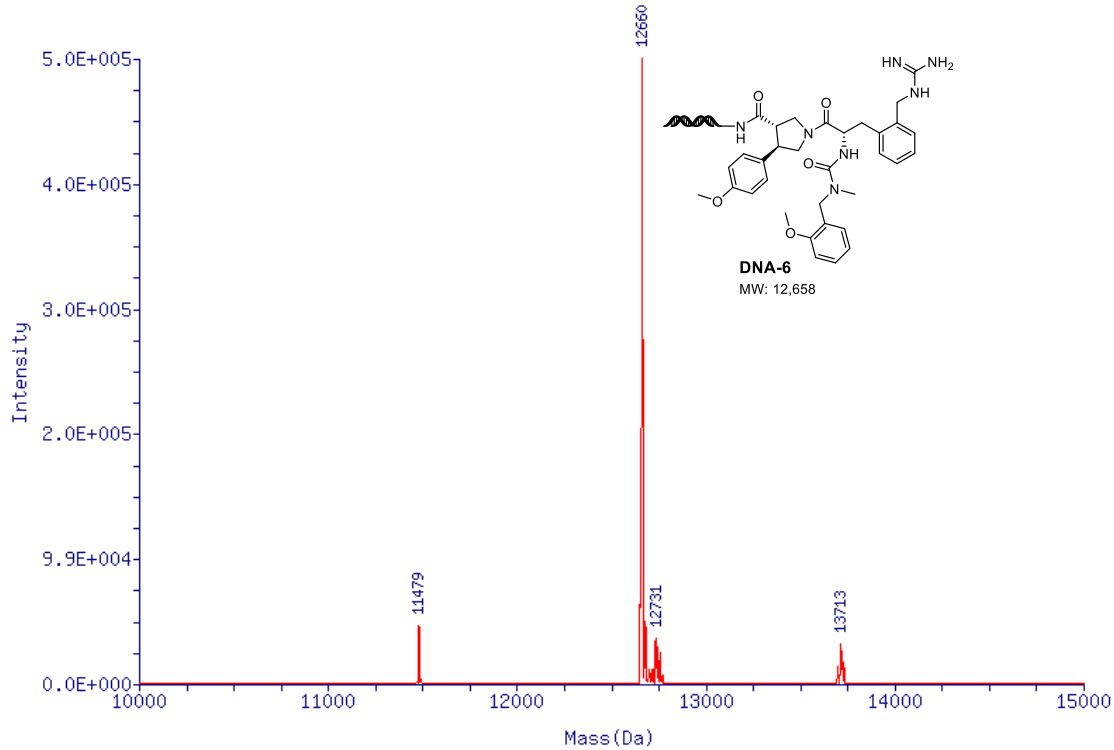

### 7f) <sup>1</sup>H and <sup>13</sup>C NMR spectra

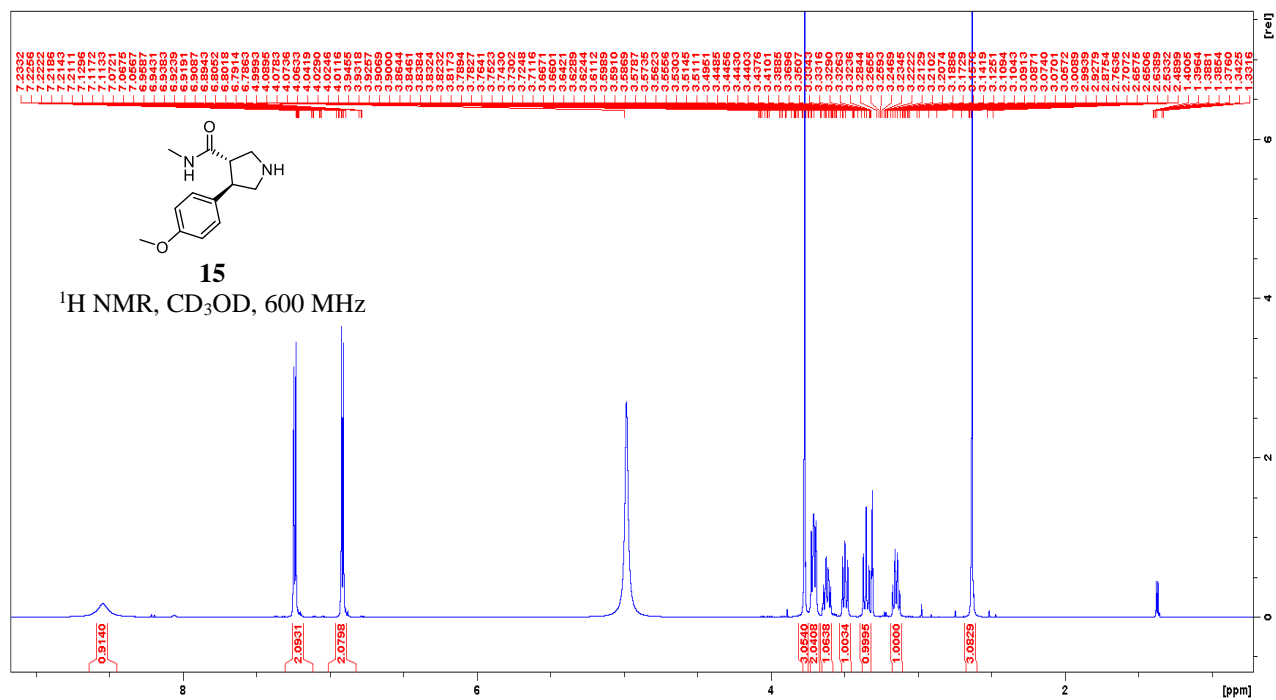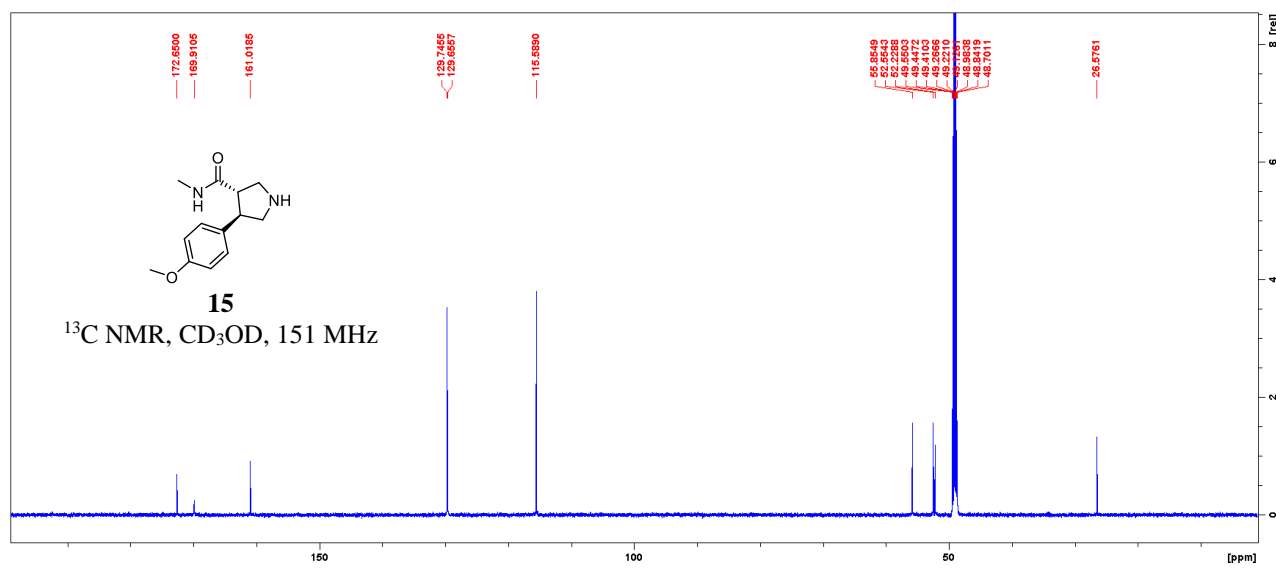

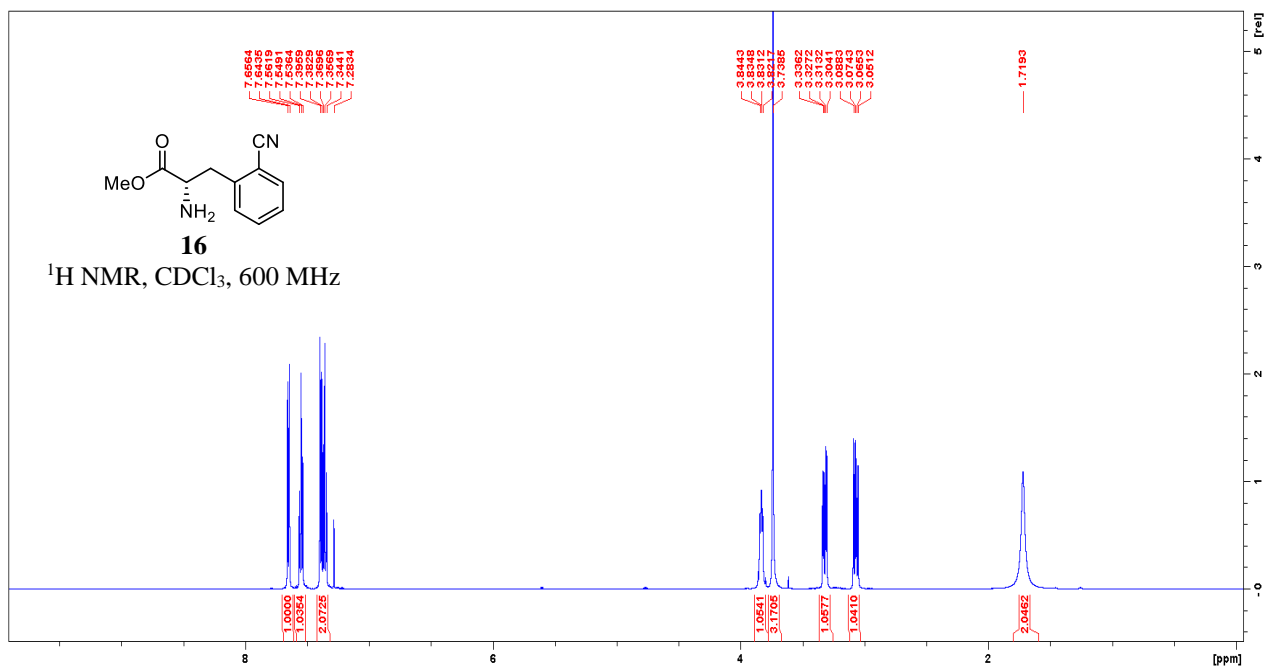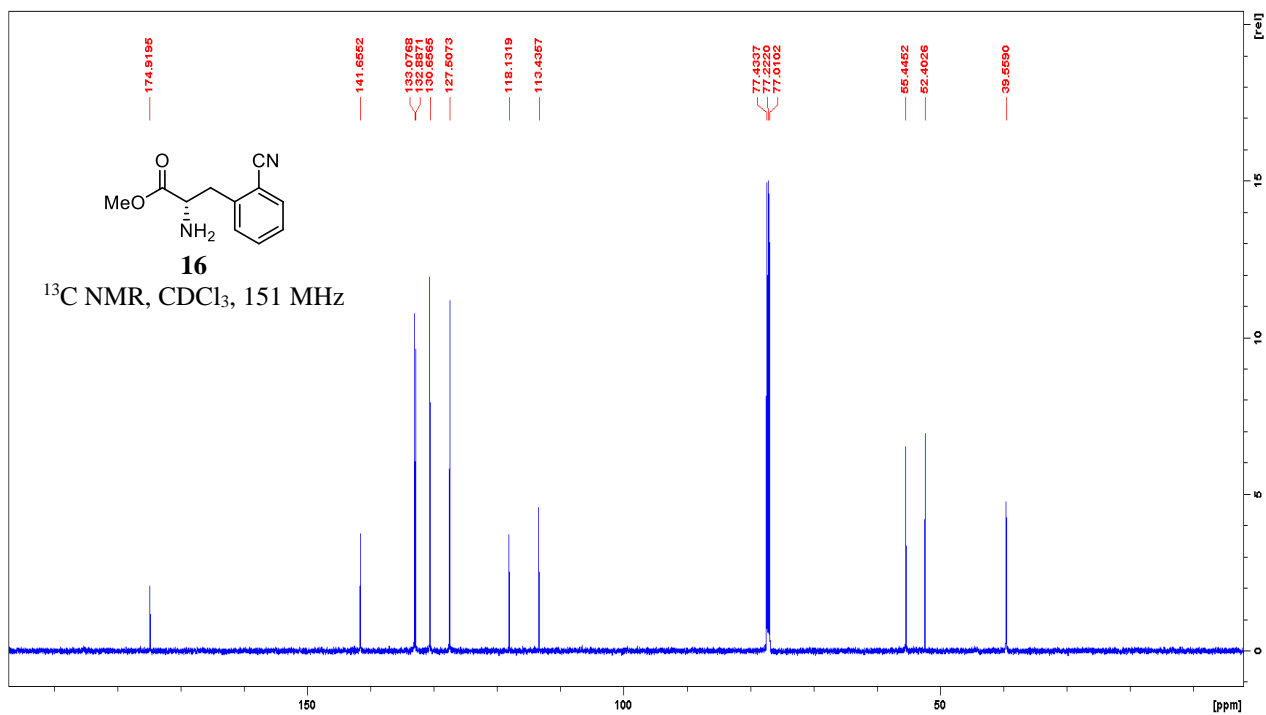



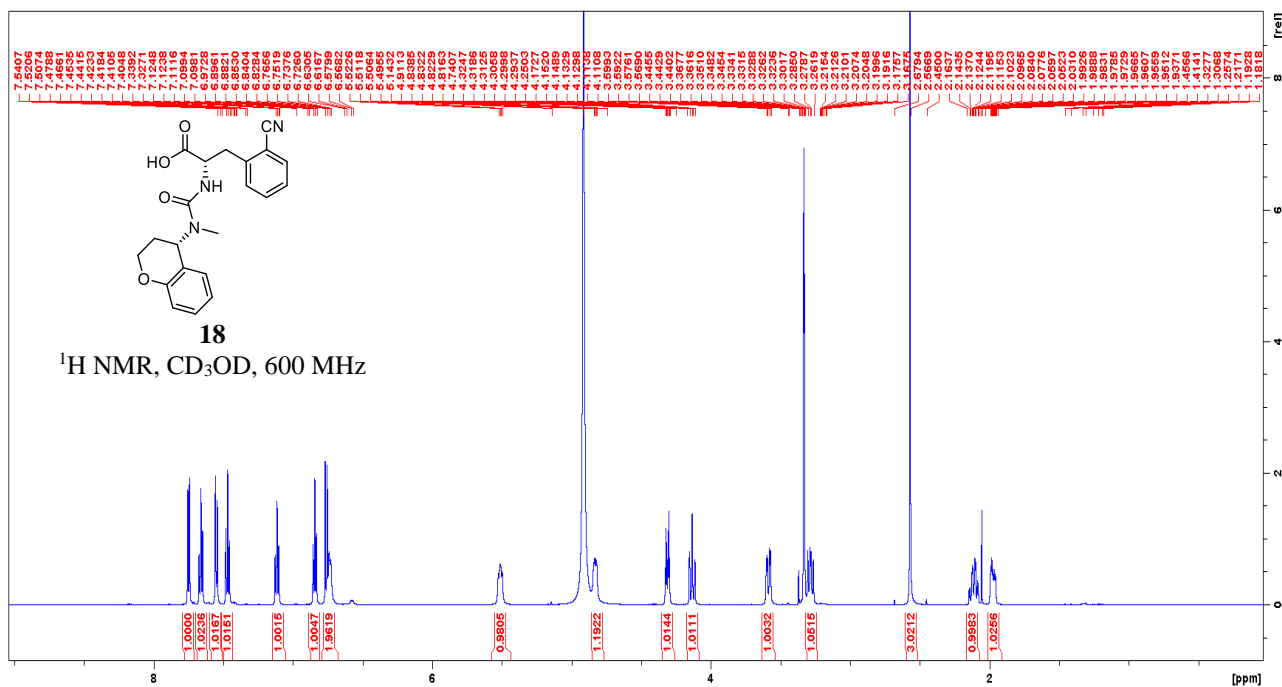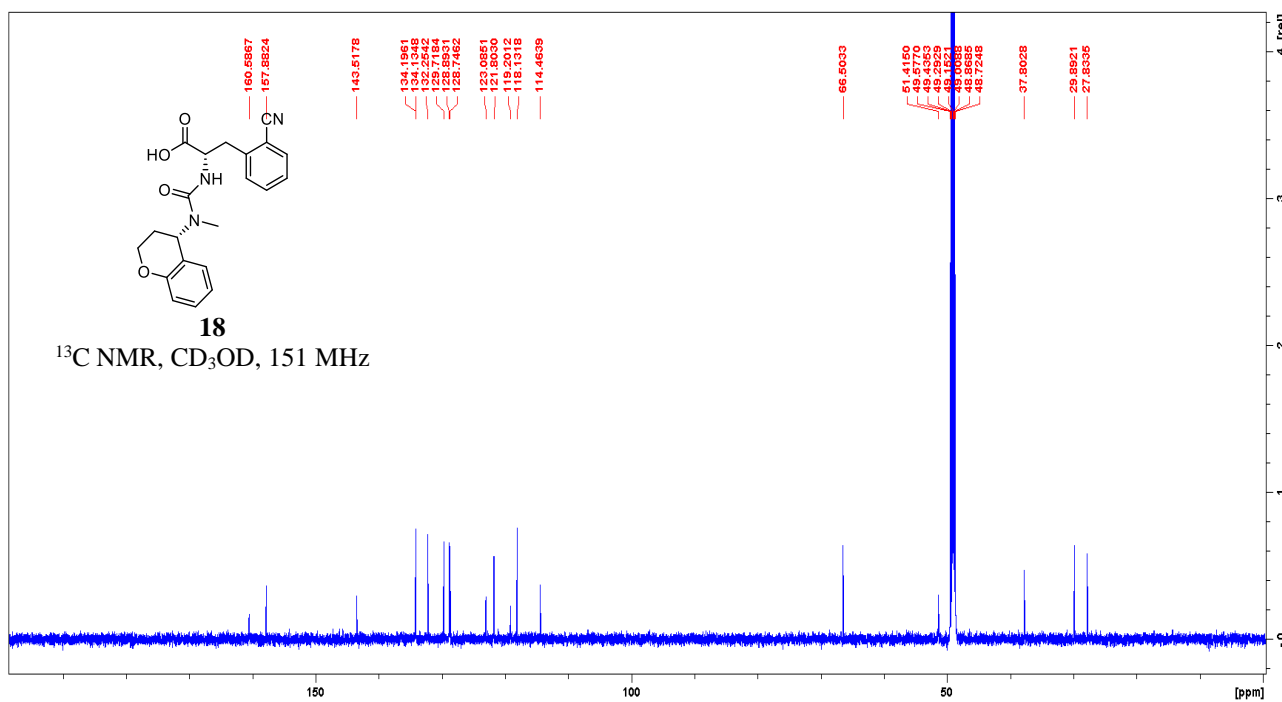

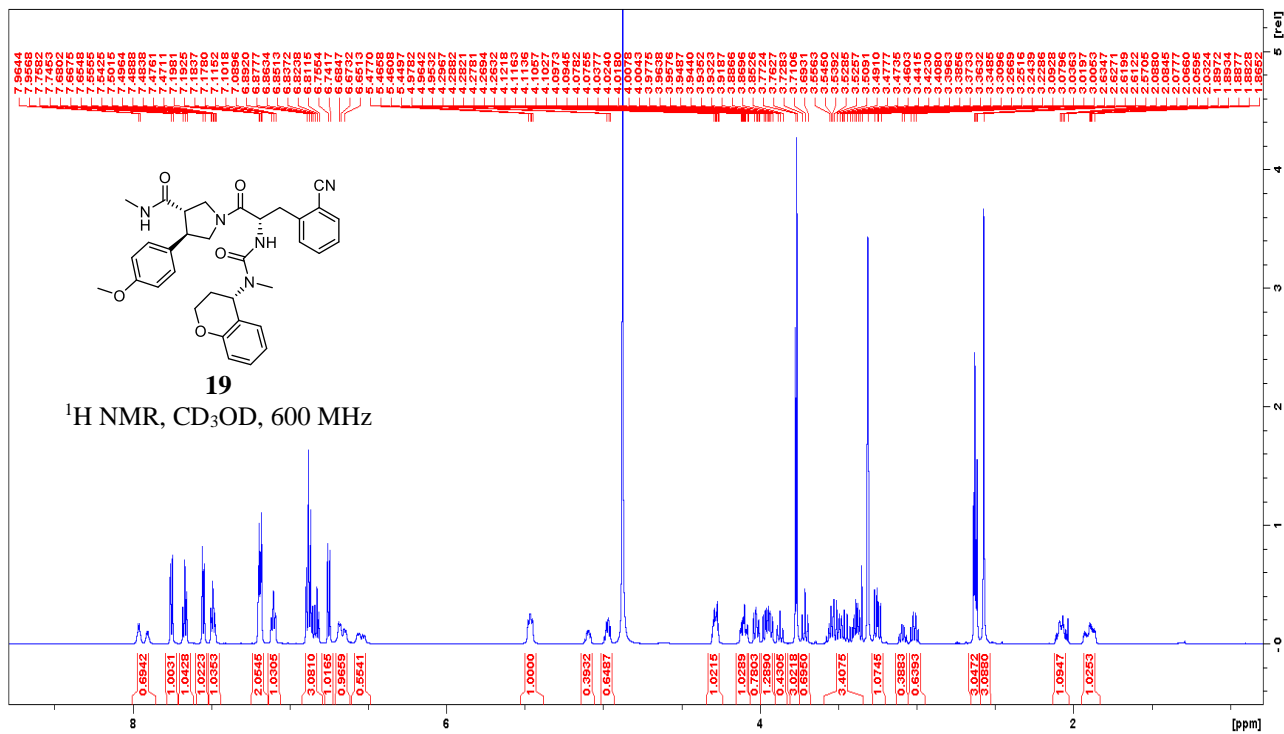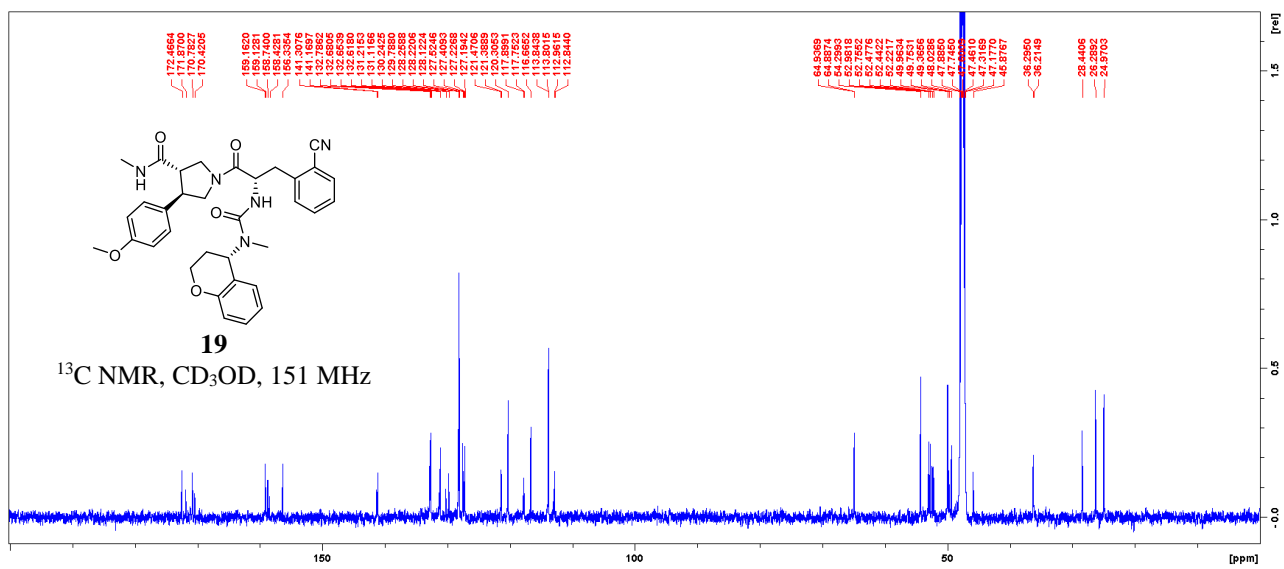

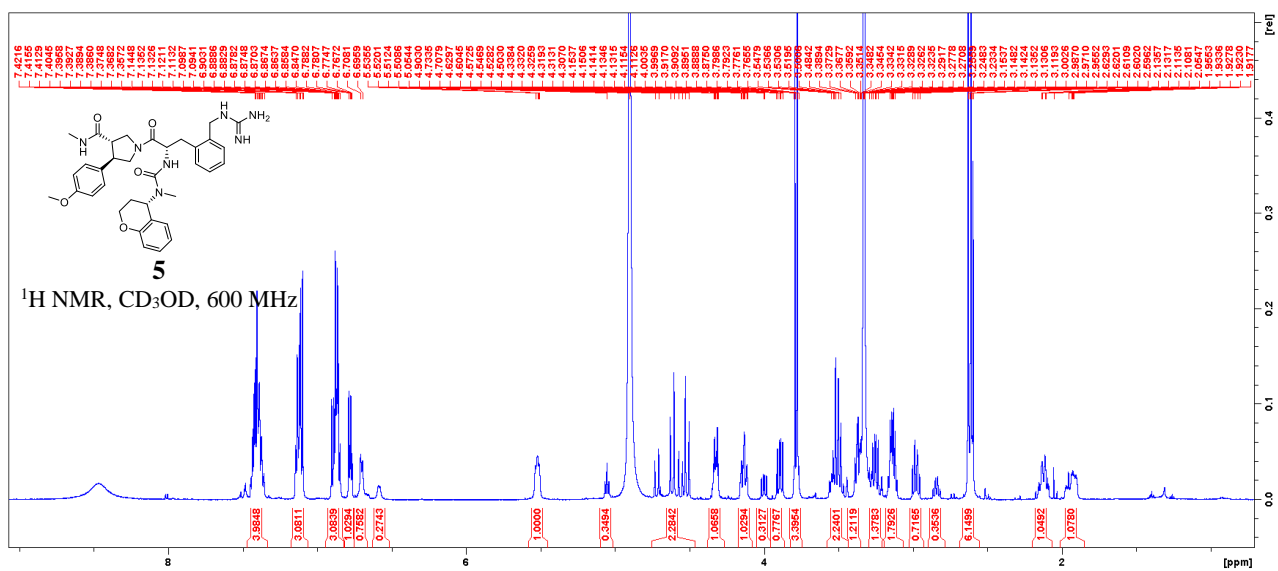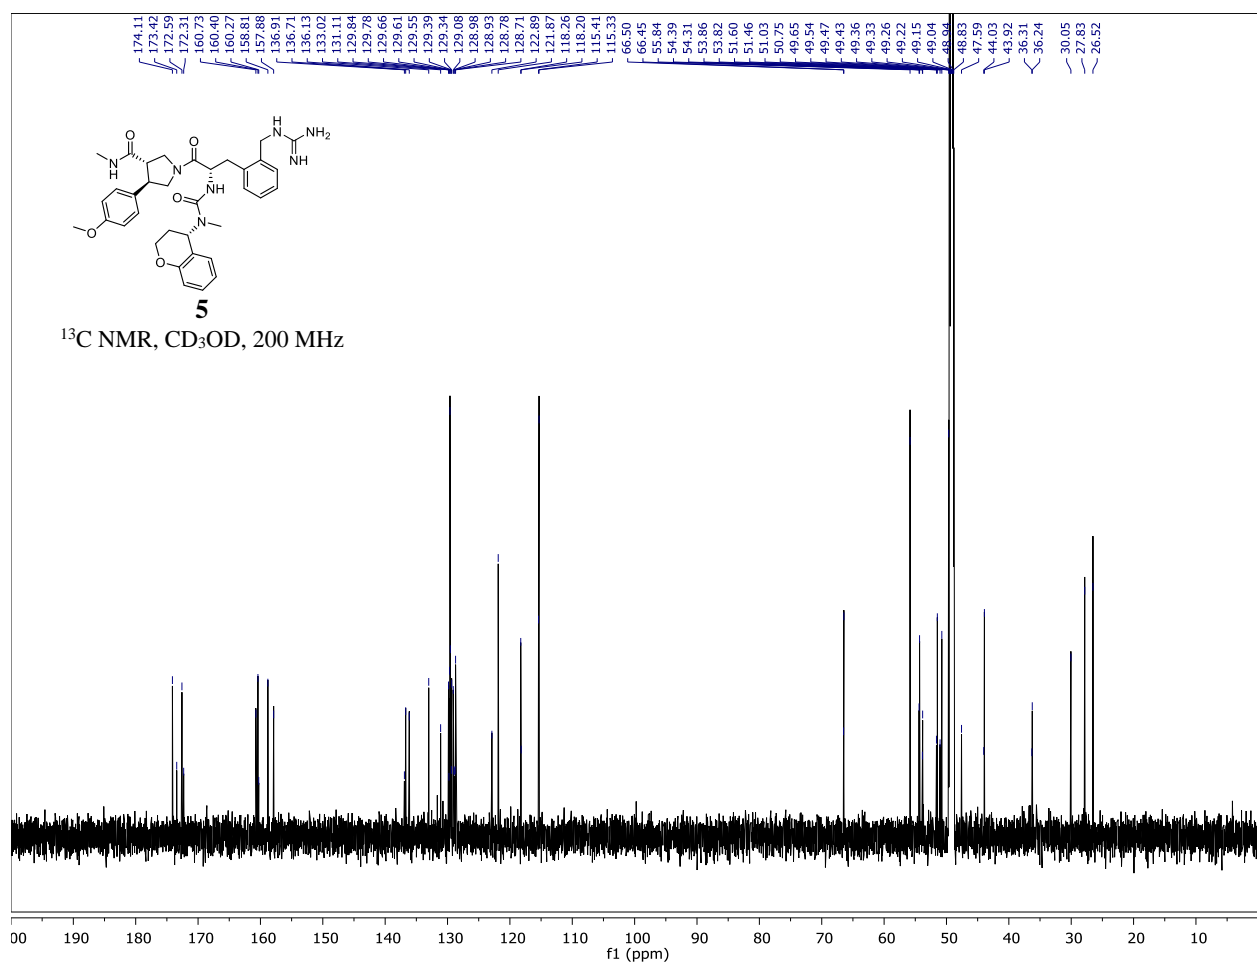

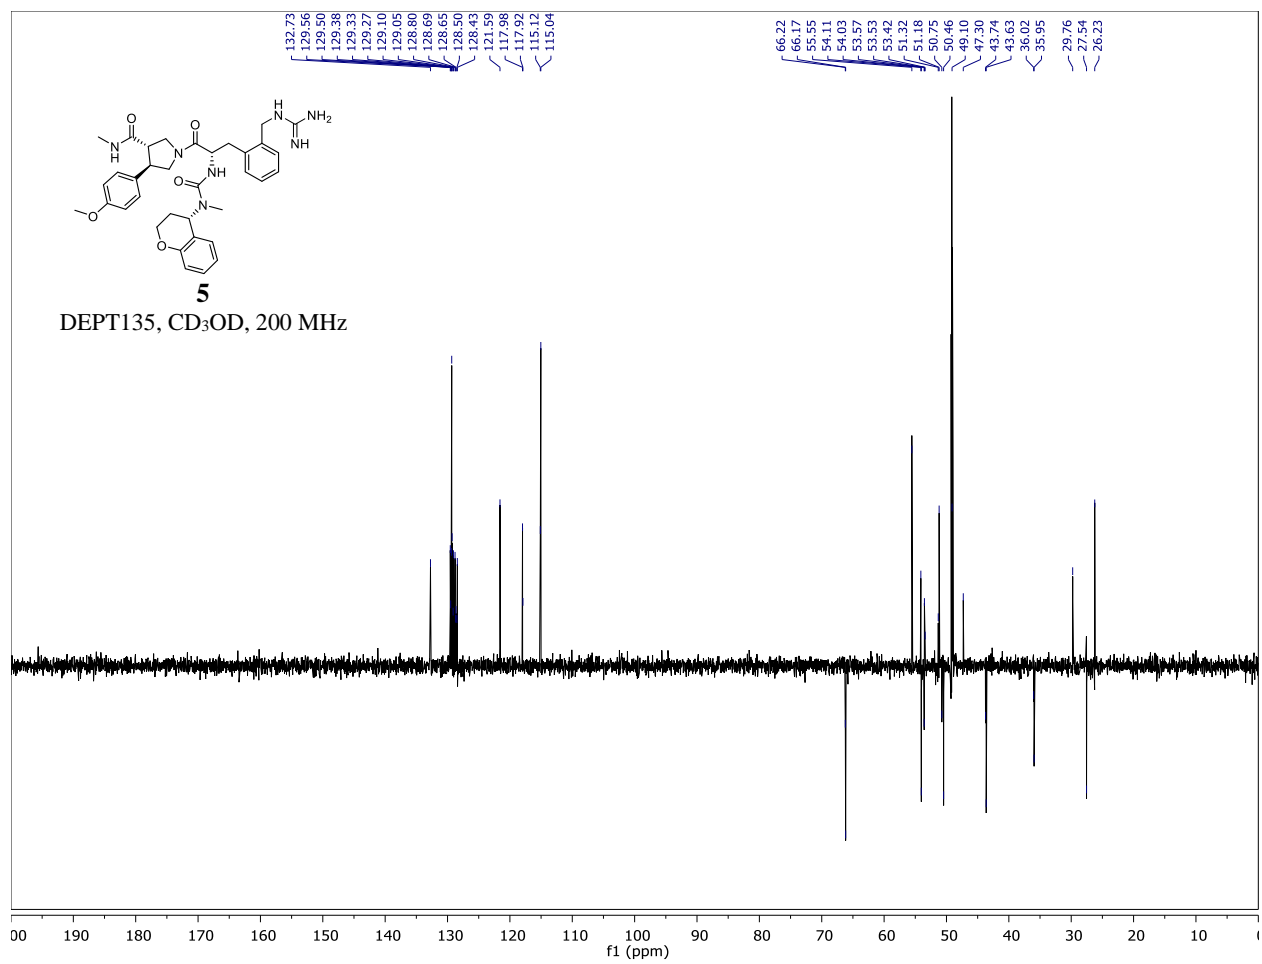

Supplement: pnas.2005447117.sapp.pdf [file pnas.2005447117.sapp.pdf]
